# Supplementary material for: Development of the RF-GSEA Method for Identifying Disulfidptosis-Related Genes and Application in Hepatocellular Carcinoma
Source: Curr Issues Mol Biol. 2023 Nov 24;45(12):9450–70. doi: 10.3390/cimb45120593 (PMC10741996; doi:10.3390/cimb45120593)
Supplement: Supplementary file 1 [file cimb-45-00593-s001.zip › Supplementary tables.xlsx]

## Sheet: Table S1
Disulfidptosis-related genes obtained from FerrDb database
Gene	Confidence
FLNA	Deduced
FLNB	Deduced
MYH9	Deduced
TLN1	Deduced
DBN1	Deduced
ACTA1	Deduced
ACTA2	Deduced
ACTB	Deduced
ACTBL2	Deduced
ACTC1	Deduced
ACTG1	Deduced
ACTG2	Deduced
MYH10	Deduced
TARDBP	Deduced
CHD4	Deduced
HNRNPU	Deduced
ATXN10	Deduced
GTF2I	Deduced
SART3	Deduced
CAPZB	Deduced
ARMC6	Deduced
CHCHD3	Deduced
NLN	Deduced
HNRNPH1	Deduced
MRPS17	Deduced
ANP32E	Deduced
PCBP2	Deduced
PDLIM1	Deduced
PRC1	Deduced
ACTN4	Deduced
IPO7	Deduced
RNH1	Deduced
RPA1	Deduced
PML	Deduced
IQGAP1	Deduced
HNRNPA3	Deduced
HNRNPM	Deduced
RRP1	Deduced
MYL6	Deduced
DSTN	Deduced
PRDX1	Deduced
DHX9	Deduced
NSUN2	Deduced
SQSTM1	Deduced
BOP1	Deduced
SAFB2	Deduced
TRIP6	Deduced
INF2	Deduced
SPART	Deduced
IPO4	Deduced
UBASH3B	Deduced
GCN1	Deduced
RUFY1	Deduced
TNKS1BP1	Deduced
AAAS	Deduced
FANCI	Deduced
SMPD4	Deduced
STRAP	Deduced
SAMM50	Deduced
CD2AP	Deduced
ZHX2	Deduced
SLC3A2	Screened
SLC7A11	Screened
GYS1	Screened
NDUFS1	Screened
OXSM	Screened
LRPPRC	Screened
NDUFA11	Screened
NUBPL	Screened
NDUFS2	Screened
CNOT1	Screened
NDUFC1	Screened
EPAS1	Screened
PPM1F	Screened
NDUFA10	Screened
NCKAP1	Validated
RPN1	Validated
WASF2	Validated
CYFIP1	Validated
ABI2	Validated
BRK1	Validated
RAC1	Validated
SLC2A1	Validated
SLC2A3	Validated

## Sheet: Table S2
%IncMSE_Negative (N=420)
Gene	enrichmentScore	NES	pvalue	rank	leading_edge	core_enrichment
AC004674.1	-0.999691	-1.19814	0.00299105	19	tags=2%, list=0%, signal=2%	AAAS/SMPD4
GML	-0.997693	-1.20564	0.0455275	84	tags=2%, list=0%, signal=2%	SLC2A3/SQSTM1
AC076968.1	-0.999255	-1.21747	0.0161437	43	tags=2%, list=0%, signal=2%	AAAS/NDUFA11
CLPS	-0.983504	-1.22388	0.0277463	367	tags=5%, list=1%, signal=5%	NDUFS1/RRP1/SLC2A1/CD2AP
LINC02114	-0.998946	-1.22675	0.0285252	61	tags=4%, list=0%, signal=4%	AAAS/NDUFA10/ABI2
FAM242A	-0.996515	-1.22882	0.0160342	31	tags=2%, list=0%, signal=2%	AAAS/CAPZB
ANAPC1P6	-0.998619	-1.23154	0.018903	78	tags=2%, list=0%, signal=2%	NDUFS2/BOP1
LINC02238	-0.999364	-1.24179	0.00679758	37	tags=2%, list=0%, signal=2%	AAAS/FLNA
MIR409	-0.999855	-1.24411	1e-10	10	tags=2%, list=0%, signal=2%	IPO4/DBN1
AP001005.2	-1	-1.24761	1e-10	2	tags=2%, list=0%, signal=2%	PRDX1/ATXN10
AC099786.3	-0.999527	-1.24966	0.00804302	28	tags=2%, list=0%, signal=2%	AAAS/ATXN10
AC092035.1	-0.999237	-1.25056	0.0102286	44	tags=2%, list=0%, signal=2%	AAAS/SLC2A3
AL359955.1	-0.992548	-1.25121	0.024287	412	tags=2%, list=1%, signal=2%	AAAS/FANCI
AC074290.1	-0.994988	-1.25514	0.0133806	21	tags=2%, list=0%, signal=2%	AAAS/TARDBP
VN1R9P	-0.999618	-1.25594	0.00659883	23	tags=2%, list=0%, signal=2%	RPN1/EPAS1
AGKP1	-0.998709	-1.25681	0.028881	73	tags=2%, list=0%, signal=2%	AAAS/CHCHD3
AL109610.1	-0.997946	-1.25821	0.0455912	115	tags=2%, list=0%, signal=2%	AAAS/SPART
KCNJ18	-0.993766	-1.26004	0.040259	347	tags=5%, list=1%, signal=5%	AAAS/PDLIM1/TLN1/MRPS17
FGF7P1	-0.999818	-1.26154	1e-10	12	tags=2%, list=0%, signal=2%	SLC3A2/CAPZB
MTHFD2P4	-0.999964	-1.26267	1e-10	4	tags=2%, list=0%, signal=2%	CD2AP/ANP32E
AL357054.5	-0.999927	-1.26379	0.000702176	6	tags=2%, list=0%, signal=2%	AAAS/HNRNPU
AC097484.2	-0.999582	-1.26647	0.00873326	25	tags=2%, list=0%, signal=2%	TRIP6/OXSM
AC016542.3	-0.998001	-1.26703	0.0199356	114	tags=5%, list=0%, signal=5%	RPN1/PRDX1/ABI2/MRPS17
AP001610.1	-0.999964	-1.2672	1e-10	4	tags=2%, list=0%, signal=2%	ACTN4/BOP1
RNU6-1267P	-0.998346	-1.26881	0.0162611	93	tags=2%, list=0%, signal=2%	AAAS/NLN
HNRNPCL3	-0.975525	-1.26958	0.0198421	853	tags=5%, list=2%, signal=5%	ACTB/ABI2/HNRNPH1/NDUFS1
DUXAP5	-0.999055	-1.27076	0.0143352	54	tags=2%, list=0%, signal=2%	AAAS/DBN1
TBC1D3C	-0.998291	-1.27088	0.0353949	96	tags=2%, list=0%, signal=2%	AAAS/DSTN
AL445528.1	-0.998582	-1.272	0.0224224	80	tags=2%, list=0%, signal=2%	AAAS/NLN
LINC02220	-0.988379	-1.27218	0.0289356	390	tags=6%, list=1%, signal=6%	ACTA2/LRPPRC/WASF2/NDUFA10/NUBPL
RNU6-1248P	-0.999818	-1.27532	0.00968349	12	tags=2%, list=0%, signal=2%	AAAS/SLC3A2
AC068112.1	-0.999582	-1.27756	0.0052836	25	tags=2%, list=0%, signal=2%	AAAS/PPM1F
RPL37P25	-0.99831	-1.27804	0.0495611	96	tags=4%, list=0%, signal=4%	RUFY1/EPAS1/CHD4
AC007450.1	-0.997819	-1.27894	0.0183228	122	tags=2%, list=0%, signal=2%	PCBP2/PRDX1
AC112225.1	-0.999255	-1.28073	0.00913533	43	tags=2%, list=0%, signal=2%	AAAS/ACTA2
RNU6-492P	-0.999945	-1.28312	1e-10	5	tags=2%, list=0%, signal=2%	AAAS/NSUN2
AL390038.1	-0.999818	-1.28314	0.00571722	12	tags=2%, list=0%, signal=2%	AAAS/NSUN2
OLIG2	-0.975188	-1.28459	0.0251326	830	tags=6%, list=2%, signal=6%	GYS1/ACTA1/CHCHD3/GCN1/FLNB
SNRPEP10	-0.999782	-1.28767	0.000398406	14	tags=2%, list=0%, signal=2%	AAAS/SQSTM1
AC009494.2	-0.999891	-1.28862	0.00260515	8	tags=2%, list=0%, signal=2%	AAAS/CAPZB
AK6P1	-0.999546	-1.29023	0.00707363	27	tags=2%, list=0%, signal=2%	OXSM/GCN1
AC242022.2	-0.9988	-1.29087	0.0207395	68	tags=2%, list=0%, signal=2%	AAAS/SAMM50
OR52Q1P	-0.999727	-1.29253	0.00313118	17	tags=2%, list=0%, signal=2%	AAAS/NSUN2
AP003357.1	-0.999582	-1.29791	0.00898094	25	tags=2%, list=0%, signal=2%	AAAS/CYFIP1
DUSP21	-0.99791	-1.29803	0.0480958	117	tags=2%, list=0%, signal=2%	AAAS/OXSM
RPS3AP33	-0.9992	-1.29924	0.00510366	46	tags=2%, list=0%, signal=2%	AAAS/FANCI
MTCO1P49	-0.997819	-1.30234	0.0201107	122	tags=2%, list=0%, signal=2%	AAAS/RNH1
SALL4P5	-0.994802	-1.30257	0.0298797	288	tags=2%, list=1%, signal=2%	AAAS/HNRNPA3
AC005906.1	-0.991693	-1.30263	0.0498455	460	tags=4%, list=1%, signal=4%	AAAS/WASF2/SLC7A11
MIR624	-0.996147	-1.30368	0.0294834	214	tags=2%, list=0%, signal=2%	AAAS/HNRNPH1
LINC01233	-0.975888	-1.30651	0.0429675	225	tags=4%, list=0%, signal=4%	RRP1/STRAP/SLC2A3
AC067942.4	-0.997764	-1.307	0.0268048	125	tags=2%, list=0%, signal=2%	AAAS/INF2
MIR4513	-0.998964	-1.30724	0.0115728	59	tags=2%, list=0%, signal=2%	AAAS/TRIP6
AC097375.5	-0.99562	-1.30927	0.0117682	243	tags=2%, list=0%, signal=2%	AAAS/SLC3A2
AC093838.1	-0.974271	-1.31059	0.0249347	841	tags=10%, list=2%, signal=9%	ACTBL2/SART3/OXSM/CNOT1/NDUFS2/WASF2/RPN1/BRK1
AC009878.2	-0.998219	-1.3125	0.0435122	100	tags=2%, list=0%, signal=2%	AAAS/NCKAP1
AL139294.1	-0.999727	-1.31452	0.006431	17	tags=2%, list=0%, signal=2%	AAAS/DHX9
AC091117.2	-0.73044	-1.31457	0.0434437	3619	tags=13%, list=7%, signal=12%	NUBPL/RUFY1/NLN/BOP1/CHD4/ACTG1/IQGAP1/MRPS17/ABI2/NDUFS1/OXSM
AP001330.2	-0.984187	-1.3147	0.0371917	876	tags=7%, list=2%, signal=7%	AAAS/NDUFS2/SLC7A11/HNRNPU/BOP1/SQSTM1
MIR5194	-0.992166	-1.31527	0.0420972	436	tags=6%, list=1%, signal=6%	AAAS/NDUFA11/SQSTM1/SLC7A11/ACTBL2
KRTAP19-8	-0.999636	-1.3157	0.0225989	22	tags=2%, list=0%, signal=2%	AAAS/NDUFS1
KRT31	-0.974729	-1.31665	0.0318532	52	tags=2%, list=0%, signal=2%	NDUFS2/CYFIP1
RPL17P19	-0.999836	-1.31696	1e-10	11	tags=2%, list=0%, signal=2%	AAAS/ACTC1
LINC01897	-0.979548	-1.31759	0.029217	264	tags=4%, list=0%, signal=4%	AAAS/NSUN2/ACTN4
RNU2-56P	-0.999727	-1.31825	1e-10	17	tags=2%, list=0%, signal=2%	CHD4/PPM1F
AC012445.1	-0.999873	-1.31958	0.0049949	9	tags=2%, list=0%, signal=2%	AAAS/SQSTM1
LINC02135	-0.999255	-1.32027	0.017819	43	tags=2%, list=0%, signal=2%	NLN/SLC2A1
AP002075.1	-0.999473	-1.32313	0.0397205	31	tags=2%, list=0%, signal=2%	AAAS/CAPZB
AL583824.1	-0.693465	-1.32409	0.0414618	4014	tags=32%, list=7%, signal=30%	SLC3A2/TNKS1BP1/FLNA/DHX9/CNOT1/NDUFA11/ABI2/WASF2/CYFIP1/HNRNPM/LRPPRC/STRAP/PDLIM1/PML/ARMC6/ACTG2/NCKAP1/PRC1/DSTN/IPO4/GTF2I/AAAS/TLN1/OXSM/TRIP6/ACTN4/ACTB
AC010157.2	-0.9992	-1.32499	0.0395651	46	tags=2%, list=0%, signal=2%	RAC1/MYL6
AC064862.3	-0.998746	-1.32565	0.0476391	71	tags=2%, list=0%, signal=2%	AAAS/RPN1
LINC00092	-0.765508	-1.32711	0.0479719	1316	tags=8%, list=2%, signal=8%	BOP1/ZHX2/UBASH3B/FLNA/ACTA1/MYH9/ANP32E
RNU6-1077P	-0.998564	-1.32712	0.00699924	81	tags=2%, list=0%, signal=2%	AAAS/SLC2A1
RN7SKP268	-0.999291	-1.32795	0.0202434	41	tags=2%, list=0%, signal=2%	AAAS/ACTA2
FCRL4	-0.9582	-1.32804	0.040828	1031	tags=12%, list=2%, signal=12%	NUBPL/DBN1/RNH1/NLN/MRPS17/SAMM50/ABI2/BRK1/TARDBP/ACTBL2
AP005901.4	-0.999982	-1.32864	1.35734e-05	3	tags=2%, list=0%, signal=2%	AAAS/PCBP2
AC027541.1	-0.999709	-1.32874	1e-10	18	tags=2%, list=0%, signal=2%	FLNB/MYH10
VPS37D	-0.637384	-1.32889	0.0346011	5950	tags=23%, list=11%, signal=20%	RPA1/NDUFA10/MYL6/MYH10/UBASH3B/SPART/CHD4/SMPD4/RPN1/ZHX2/MRPS17/BRK1/TNKS1BP1/AAAS/PDLIM1/SAFB2/SLC2A1/ACTA1/ACTA2
ASDURF	-0.999582	-1.32993	0.0095452	25	tags=2%, list=0%, signal=2%	AAAS/ACTA2
AL136114.1	-0.793449	-1.33091	0.037171	2624	tags=11%, list=5%, signal=10%	FLNB/SLC2A1/NDUFS2/ACTG2/PRDX1/MRPS17/IQGAP1/OXSM/TNKS1BP1
AC015943.1	-0.973419	-1.33234	0.0251497	545	tags=4%, list=1%, signal=4%	AAAS/RUFY1/PDLIM1
AC092590.1	-0.974727	-1.33536	0.0144855	1147	tags=5%, list=2%, signal=5%	PDLIM1/RRP1/ATXN10/NUBPL
AC007375.1	-0.999746	-1.33548	1e-10	16	tags=2%, list=0%, signal=2%	IPO7/CNOT1
GSTA9P	-0.976667	-1.33653	0.0146643	228	tags=6%, list=0%, signal=6%	SLC7A11/TRIP6/PRDX1/ACTG2/HNRNPU
RN7SL644P	-0.994056	-1.33697	0.0387643	329	tags=2%, list=1%, signal=2%	AAAS/TRIP6
CACNG6	-0.937529	-1.33787	0.0459273	18	tags=2%, list=0%, signal=2%	RPN1/ACTB
TBC1D3B	-0.739212	-1.33845	0.00310583	1643	tags=8%, list=3%, signal=8%	NDUFS1/ACTG2/SLC2A1/MYH9/UBASH3B/PML/ABI2
AC142086.6	-0.99651	-1.33935	0.0193355	194	tags=2%, list=0%, signal=2%	AAAS/STRAP
AC006511.4	-0.999509	-1.33955	0.0407038	29	tags=2%, list=0%, signal=2%	AAAS/WASF2
FAM138E	-0.974433	-1.34069	0.0430128	937	tags=7%, list=2%, signal=7%	TARDBP/CAPZB/NCKAP1/FANCI/SLC3A2/INF2
B4GALNT3	-0.739218	-1.34169	0.0377485	3268	tags=13%, list=6%, signal=12%	PRDX1/RRP1/ABI2/ACTA1/NDUFS2/SPART/ATXN10/OXSM/HNRNPU/UBASH3B/DBN1
AC093893.1	-0.988494	-1.3421	0.0471752	635	tags=2%, list=1%, signal=2%	AAAS/STRAP
RNU6-851P	-0.99422	-1.3427	0.0337505	321	tags=4%, list=1%, signal=4%	AAAS/SLC7A11/ACTA2
RNU6-293P	-0.999855	-1.34292	1e-10	10	tags=2%, list=0%, signal=2%	MYL6/OXSM
RNA5SP481	-0.999927	-1.34421	1e-10	6	tags=2%, list=0%, signal=2%	AAAS/UBASH3B
RN7SL625P	-0.999982	-1.34425	0.00478336	3	tags=2%, list=0%, signal=2%	AAAS/UBASH3B
AC120036.1	-0.994947	-1.34534	0.00036253	280	tags=2%, list=1%, signal=2%	RRP1/FLNB
LINC00462	-0.946294	-1.34674	0.0412788	106	tags=6%, list=0%, signal=6%	MRPS17/SLC2A1/NDUFS1/PDLIM1/ZHX2
AL450263.2	-0.998219	-1.34684	0.00270981	100	tags=2%, list=0%, signal=2%	AAAS/ACTB
FTHL18	-0.999437	-1.3482	0.0246043	33	tags=2%, list=0%, signal=2%	AAAS/CHCHD3
MIR1265	-0.999673	-1.34911	1e-10	20	tags=2%, list=0%, signal=2%	ABI2/ACTB
RN7SKP39	-0.969498	-1.35195	0.0177831	462	tags=4%, list=1%, signal=4%	HNRNPM/RPA1/SMPD4
MIR885	-0.767469	-1.35206	0.049361	4189	tags=19%, list=8%, signal=18%	SLC7A11/RNH1/DSTN/NUBPL/SQSTM1/SLC2A1/PDLIM1/BRK1/SLC2A3/HNRNPH1/LRPPRC/TLN1/MYL6/ACTG2/RRP1/TRIP6
RNU6-1311P	-0.98126	-1.35311	0.0494664	1036	tags=6%, list=2%, signal=6%	AAAS/SAMM50/MYL6/NSUN2/PML
SLC6A16	-0.637616	-1.35314	0.0446998	4694	tags=21%, list=9%, signal=20%	IPO4/SAMM50/TRIP6/BOP1/PRDX1/CYFIP1/ANP32E/ACTC1/DHX9/PDLIM1/NDUFS1/RAC1/BRK1/ACTA1/SLC3A2/ACTG1/MYL6/SPART
MYLPF	-0.693742	-1.35382	0.0434735	2103	tags=10%, list=4%, signal=9%	GCN1/LRPPRC/IPO4/BRK1/RPA1/CHCHD3/ACTA2/HNRNPH1
PGAM1P9	-0.999691	-1.35436	0.0151894	19	tags=2%, list=0%, signal=2%	AAAS/CYFIP1
AC103808.3	-0.76571	-1.35464	0.0468867	2884	tags=19%, list=5%, signal=18%	ZHX2/NSUN2/HNRNPU/RUFY1/LRPPRC/ACTG1/CHD4/BOP1/SLC7A11/NDUFS2/SAFB2/EPAS1/NDUFA10/PRC1/FANCI/SLC3A2
AL353803.2	-0.888517	-1.35619	0.0498728	1964	tags=11%, list=4%, signal=10%	NUBPL/TLN1/ACTA1/INF2/ATXN10/MYL6/NCKAP1/RNH1/PPM1F
GYG1P3	-0.98964	-1.35812	0.0183582	575	tags=6%, list=1%, signal=6%	AAAS/NDUFA11/IPO4/ACTG2/NDUFC1
KRT18P20	-0.737191	-1.35819	0.0330528	5234	tags=17%, list=9%, signal=15%	RUFY1/CHD4/MYL6/HNRNPH1/SPART/BRK1/STRAP/SAFB2/MYH9/SLC2A1/ACTA1/GCN1/PRC1/SLC3A2
AP002954.2	-0.947979	-1.35826	0.041874	1878	tags=8%, list=3%, signal=8%	RAC1/ACTN4/DBN1/CHD4/NDUFC1/SAMM50/ACTG1
AL355863.1	-1	-1.35877	0.00117213	2	tags=2%, list=0%, signal=2%	AAAS/NDUFA10
TRBV5-6	-0.769255	-1.35879	0.0378352	1920	tags=11%, list=3%, signal=10%	UBASH3B/CHD4/PML/PPM1F/SLC2A3/ARMC6/RNH1/SLC7A11/STRAP
DEFA4	-0.851636	-1.35991	0.0460517	2774	tags=8%, list=5%, signal=8%	LRPPRC/NDUFS2/ACTG2/CYFIP1/PCBP2/TRIP6/INF2
AC139493.2	-0.716949	-1.35992	0.0358012	1646	tags=14%, list=3%, signal=14%	DSTN/CAPZB/RPN1/SART3/NDUFC1/AAAS/HNRNPU/MYL6/HNRNPM/ZHX2/SAMM50/PRC1
IGLV3-15	-0.999382	-1.36004	0.0307088	36	tags=2%, list=0%, signal=2%	AAAS/SLC2A1
AC024940.4	-0.999927	-1.36023	1e-10	6	tags=2%, list=0%, signal=2%	RAC1/HNRNPH1
AC110800.1	-0.999873	-1.36082	1e-10	9	tags=2%, list=0%, signal=2%	RRP1/ATXN10
AC005230.1	-0.991239	-1.36086	0.0409302	485	tags=4%, list=1%, signal=4%	AAAS/SART3/NSUN2
NDUFA3P6	-0.995438	-1.36546	0.0154981	253	tags=2%, list=0%, signal=2%	AAAS/SAMM50
MAGEA10-MAGEA5	-0.875612	-1.36634	0.0469983	1114	tags=11%, list=2%, signal=11%	GTF2I/ANP32E/SPART/MYL6/WASF2/CD2AP/GYS1/NUBPL/GCN1
AP003108.3	-0.8001	-1.36662	0.0399961	2763	tags=19%, list=5%, signal=18%	SMPD4/DBN1/LRPPRC/SART3/STRAP/CAPZB/IPO4/CHCHD3/BRK1/OXSM/ARMC6/PML/ANP32E/SLC3A2/MYH9/HNRNPH1
TPT1P3	-0.779219	-1.36772	1e-10	3632	tags=12%, list=7%, signal=11%	CHD4/IPO4/ARMC6/DSTN/SLC3A2/ACTN4/SAFB2/TNKS1BP1/RRP1/FANCI
RNY4P18	-0.999909	-1.36772	1e-10	7	tags=2%, list=0%, signal=2%	ACTG1/RNH1
AC009312.1	-0.997612	-1.3693	0.0213987	22	tags=2%, list=0%, signal=2%	CYFIP1/ACTG1
AC010424.1	-0.975735	-1.36953	0.0474069	1340	tags=6%, list=2%, signal=6%	AAAS/SLC2A3/MYH10/ARMC6/ACTG1
AC253536.7	-0.948988	-1.37005	0.0216361	1695	tags=8%, list=3%, signal=8%	ACTA1/ATXN10/IPO4/ANP32E/NDUFS1/PPM1F/NDUFC1
AC093865.1	-0.989712	-1.37296	0.00301162	571	tags=6%, list=1%, signal=6%	AAAS/ANP32E/SLC2A1/ACTBL2/DBN1
GK2	-0.999273	-1.37422	0.0288596	42	tags=2%, list=0%, signal=2%	AAAS/SLC2A3
AC092757.1	-0.966628	-1.37444	0.0317543	1842	tags=7%, list=3%, signal=7%	AAAS/UBASH3B/NDUFA10/CNOT1/DSTN/MYL6
AC093414.1	-0.999218	-1.37553	0.0287314	45	tags=2%, list=0%, signal=2%	AAAS/RPN1
AC027119.1	-1	-1.376	1e-10	2	tags=2%, list=0%, signal=2%	AAAS/SLC2A3
RN7SL269P	-0.995492	-1.37611	0.0208341	251	tags=4%, list=0%, signal=4%	AAAS/PCBP2/RUFY1
LINC02555	-0.906317	-1.3764	0.0274921	796	tags=6%, list=1%, signal=6%	NDUFC1/IPO7/CHD4/ACTA1/RNH1
MIR4297	-0.753387	-1.3768	0.0449757	5534	tags=19%, list=10%, signal=17%	FANCI/NLN/ACTA1/SQSTM1/NDUFC1/BRK1/SLC2A3/OXSM/RPN1/PRDX1/SLC2A1/ACTB/ANP32E/TLN1/HNRNPA3/SPART
AC083836.1	-0.954678	-1.37685	0.0494118	4	tags=2%, list=0%, signal=2%	PRC1/RRP1
AC034154.1	-0.912902	-1.37963	0.0347304	2693	tags=8%, list=5%, signal=8%	AAAS/HNRNPA3/GTF2I/BRK1/NSUN2/EPAS1/PRC1
KRT12	-0.918235	-1.38021	0.044691	1143	tags=11%, list=2%, signal=11%	UBASH3B/ACTA1/TRIP6/NUBPL/CYFIP1/PCBP2/DSTN/ACTG2/PDLIM1
AC007336.2	-0.833854	-1.38172	0.03941	3132	tags=8%, list=6%, signal=8%	FANCI/SLC2A1/MRPS17/NDUFS2/CHD4/ACTG2/DBN1
LGALS9DP	-0.891991	-1.38274	0.0256203	2623	tags=14%, list=5%, signal=14%	NDUFS2/NDUFC1/ACTG1/SLC3A2/MYL6/GCN1/RAC1/MYH10/ACTN4/RPN1/PCBP2/RUFY1
CU104787.1	-0.876633	-1.38306	0.0363701	2754	tags=6%, list=5%, signal=6%	PDLIM1/CD2AP/CYFIP1/IPO4/BRK1
MIR5580	-0.999128	-1.38408	0.0444205	50	tags=2%, list=0%, signal=2%	AAAS/MYL6
AC105339.3	-0.770244	-1.38419	0.028467	4019	tags=19%, list=7%, signal=18%	RRP1/IQGAP1/OXSM/PRC1/GCN1/RPA1/SLC3A2/INF2/SPART/CYFIP1/NUBPL/CHCHD3/STRAP/BOP1/SLC2A3/ABI2
DPT	-0.733041	-1.38467	0.0319874	3289	tags=17%, list=6%, signal=16%	DHX9/NDUFS2/INF2/NSUN2/NDUFS1/PML/OXSM/ACTA2/NDUFA11/RUFY1/TNKS1BP1/RRP1/GCN1/STRAP
DSPP	-0.877784	-1.38485	0.0499572	2475	tags=12%, list=4%, signal=11%	AAAS/NDUFA10/PRC1/HNRNPA3/ACTA2/ACTG1/STRAP/INF2/TARDBP/CYFIP1
AL021328.1	-0.711633	-1.38495	0.0311685	2209	tags=13%, list=4%, signal=13%	RUFY1/SAFB2/UBASH3B/GCN1/ARMC6/SPART/TNKS1BP1/PRDX1/LRPPRC/NSUN2/HNRNPU
AC097713.2	-0.904155	-1.38577	0.0462334	2524	tags=15%, list=5%, signal=15%	CAPZB/RUFY1/ATXN10/FLNB/NUBPL/WASF2/ARMC6/BOP1/ACTB/SLC3A2/IQGAP1/MRPS17/SLC2A3
GAPDHP72	-0.733323	-1.38616	0.0475188	3639	tags=12%, list=7%, signal=11%	SLC7A11/HNRNPH1/GCN1/CYFIP1/EPAS1/NLN/ACTC1/ATXN10/SLC2A1/NDUFS2
RN7SL233P	-0.810898	-1.38644	0.0257858	2564	tags=10%, list=5%, signal=9%	PCBP2/SLC2A1/WASF2/MYH10/NDUFS1/SAMM50/IPO4/DHX9
AP000907.1	-0.833271	-1.3868	0.0460413	3265	tags=12%, list=6%, signal=11%	ABI2/SAMM50/NDUFC1/SQSTM1/CAPZB/TARDBP/IQGAP1/DBN1/NUBPL/OXSM
AL080313.2	-0.929836	-1.38831	0.0377179	1869	tags=8%, list=3%, signal=8%	NDUFS1/TRIP6/HNRNPM/NUBPL/SLC7A11/PDLIM1/SAMM50
AC125603.4	-0.858376	-1.39005	0.0371893	2735	tags=11%, list=5%, signal=10%	SAMM50/ACTG1/PCBP2/IPO7/STRAP/ACTG2/SLC7A11/TNKS1BP1/NDUFS2
OR5BR1P	-0.999828	-1.39022	0.00386498	2	tags=2%, list=0%, signal=2%	AAAS/NSUN2
AC008937.2	-0.864574	-1.39233	0.0444009	1159	tags=11%, list=2%, signal=11%	LRPPRC/RPA1/SLC7A11/TARDBP/SPART/STRAP/ACTA1/CHD4/UBASH3B
AC011626.1	-0.999364	-1.39323	0.0204032	37	tags=2%, list=0%, signal=2%	NDUFC1/MYL6
AL021331.1	-0.763577	-1.39352	0.0350849	2848	tags=20%, list=5%, signal=19%	CHD4/ACTG1/BRK1/ATXN10/RPN1/MYH10/NDUFS2/AAAS/ACTG2/ACTB/RAC1/ACTA2/HNRNPH1/OXSM/SLC3A2/FLNB/NDUFA10
RNU6-745P	-0.974372	-1.39442	0.0301685	1414	tags=5%, list=3%, signal=5%	AAAS/ACTA1/RRP1/MRPS17
AP001029.3	-0.862732	-1.39545	0.0270738	2001	tags=15%, list=4%, signal=15%	RAC1/GYS1/TLN1/NDUFS2/PCBP2/PDLIM1/FANCI/RRP1/CAPZB/ACTG1/HNRNPH1/RNH1/ACTA1
PRSS3P4	-0.976589	-1.3972	0.0292203	1292	tags=5%, list=2%, signal=5%	AAAS/PPM1F/BRK1/INF2
LINC01906	-0.967762	-1.39802	0.0409836	16	tags=2%, list=0%, signal=2%	ATXN10/CYFIP1
FARP1-AS1	-0.83329	-1.39811	0.0375102	1010	tags=6%, list=2%, signal=6%	MYH9/RPN1/NDUFS2/SLC7A11/ANP32E
AC005086.2	-0.816673	-1.39843	0.023658	3022	tags=15%, list=5%, signal=15%	LRPPRC/TARDBP/INF2/NDUFA10/EPAS1/SART3/NDUFS2/SQSTM1/HNRNPM/PCBP2/ACTB/ACTC1/GCN1
MIR4648	-0.999437	-1.40028	0.0218179	33	tags=2%, list=0%, signal=2%	AAAS/TRIP6
AC104687.1	-0.816975	-1.40154	0.0347967	2311	tags=14%, list=4%, signal=14%	ABI2/SPART/SQSTM1/ACTN4/MRPS17/ACTA2/ACTB/BOP1/RRP1/TLN1/CD2AP/SLC7A11
PCDHB1	-0.951885	-1.40267	0.0244687	27	tags=4%, list=0%, signal=4%	FLNB/TNKS1BP1/EPAS1
WASIR1	-0.972308	-1.4044	0.00596339	974	tags=4%, list=2%, signal=4%	ACTC1/NDUFC1/RPN1
MRPS35P2	-0.994779	-1.4052	0.00227428	6	tags=2%, list=0%, signal=2%	TRIP6/IPO7
AP001042.3	-0.921763	-1.40784	0.0188124	979	tags=8%, list=2%, signal=8%	SPART/ACTN4/ARMC6/AAAS/ACTG2/IPO7/PDLIM1
MIR5680	-0.999855	-1.40909	1e-10	10	tags=2%, list=0%, signal=2%	AAAS/RRP1
AC027796.3	-0.760904	-1.4097	0.0168472	3429	tags=18%, list=6%, signal=17%	ACTG1/FANCI/PCBP2/SMPD4/PRDX1/CAPZB/IPO4/ABI2/SLC2A3/RUFY1/TLN1/BOP1/MYH10/NDUFA10/CHCHD3
AC068707.1	-0.9094	-1.41021	0.0284652	1415	tags=6%, list=3%, signal=6%	TNKS1BP1/SLC7A11/NLN/PDLIM1/ABI2
AC016074.2	-0.748187	-1.41059	0.041155	1662	tags=20%, list=3%, signal=20%	MYH10/EPAS1/DSTN/CHD4/NDUFA11/SLC7A11/HNRNPA3/PDLIM1/NLN/CYFIP1/SLC2A1/CAPZB/SQSTM1/ACTG1/ARMC6/BOP1/SAMM50
AC027018.1	-0.831004	-1.41106	0.0276166	291	tags=5%, list=1%, signal=5%	STRAP/IPO4/SLC2A3/FANCI
LINC01448	-0.888517	-1.41165	0.0437133	1372	tags=7%, list=2%, signal=7%	MYH10/RUFY1/ATXN10/SAMM50/SLC7A11/SLC2A1
AF228727.1	-0.914681	-1.41216	0.0326227	2606	tags=11%, list=5%, signal=10%	AAAS/MRPS17/SLC2A1/ARMC6/ZHX2/PDLIM1/NDUFC1/SAMM50/ACTC1
VCX3A	-0.907743	-1.41219	0.0234858	1920	tags=13%, list=3%, signal=13%	OXSM/PPM1F/PRDX1/CHD4/WASF2/NDUFA10/GCN1/AAAS/TRIP6/SART3/RPN1
AC083864.5	-0.942457	-1.41323	0.0185484	411	tags=4%, list=1%, signal=4%	PRC1/NUBPL/ATXN10
AC004875.1	-0.999291	-1.41423	0.0222414	41	tags=2%, list=0%, signal=2%	AAAS/CAPZB
AC009754.2	-0.778947	-1.41501	0.0205914	4038	tags=13%, list=7%, signal=12%	TRIP6/CNOT1/UBASH3B/RAC1/RPA1/LRPPRC/GYS1/ARMC6/ACTBL2/ATXN10/TNKS1BP1
L3MBTL2-AS1	-0.748267	-1.41536	0.0133466	3061	tags=14%, list=6%, signal=14%	PCBP2/PML/BOP1/SLC7A11/EPAS1/SLC2A3/OXSM/PPM1F/MYH9/IQGAP1/ABI2/GTF2I
ARL5C	-0.800747	-1.41563	0.0292071	3150	tags=13%, list=6%, signal=12%	UBASH3B/PDLIM1/MRPS17/TLN1/EPAS1/PRDX1/MYH9/OXSM/SLC3A2/ACTG2/GYS1
AL358473.2	-0.887043	-1.41614	0.0296392	2377	tags=11%, list=4%, signal=10%	ACTG1/PDLIM1/ANP32E/OXSM/NDUFA10/SLC7A11/MYH9/ACTA2/NDUFS2
AC016743.1	-0.854689	-1.41645	0.0283882	3244	tags=12%, list=6%, signal=11%	PPM1F/DSTN/INF2/HNRNPA3/ACTA1/NDUFS2/FANCI/AAAS/SLC2A3/ANP32E
AC140125.3	-0.998909	-1.41843	0.0404916	62	tags=2%, list=0%, signal=2%	AAAS/SQSTM1
AC025614.2	-0.798843	-1.41867	0.0224608	3824	tags=14%, list=7%, signal=13%	FLNB/ACTG1/PRDX1/PML/CYFIP1/MYL6/OXSM/ACTA1/FANCI/MYH9/SART3/ACTA2
SNRPFP4	-0.978333	-1.4197	0.0175367	1097	tags=4%, list=2%, signal=4%	DBN1/NSUN2/IQGAP1
MAFA-AS1	-0.761057	-1.41988	0.0306955	4006	tags=11%, list=7%, signal=10%	RAC1/ACTBL2/SPART/NDUFA10/CD2AP/SART3/ACTC1/PCBP2/IPO4
OR2BH1P	-0.9998	-1.42073	1e-10	13	tags=2%, list=0%, signal=2%	EPAS1/OXSM
AL133297.2	-0.882147	-1.42081	0.0370434	2734	tags=11%, list=5%, signal=10%	SMPD4/NUBPL/RUFY1/GCN1/HNRNPA3/SAMM50/DSTN/PCBP2/IPO7
VWA3A	-0.965704	-1.42129	0.0218864	207	tags=4%, list=0%, signal=4%	WASF2/TRIP6/STRAP
ARSG	-0.686157	-1.42144	0.0187958	3681	tags=24%, list=7%, signal=22%	NDUFA11/AAAS/HNRNPM/FLNB/ARMC6/TNKS1BP1/INF2/SQSTM1/TARDBP/LRPPRC/NCKAP1/RUFY1/DHX9/HNRNPU/ATXN10/RAC1/FANCI/GTF2I/IQGAP1/CYFIP1
AC010511.1	-0.996232	-1.42152	0.0210297	9	tags=2%, list=0%, signal=2%	MYH10/NCKAP1
AC010723.1	-0.945635	-1.42411	0.0081777	2999	tags=10%, list=5%, signal=9%	AAAS/NLN/NDUFA11/TLN1/GYS1/IPO7/ACTG2/BOP1
AC018761.2	-0.910359	-1.4263	0.0411521	2189	tags=10%, list=4%, signal=9%	ABI2/AAAS/ANP32E/NLN/FANCI/ARMC6/NDUFS2/DSTN
AC114982.1	-0.999218	-1.42681	0.0297588	45	tags=2%, list=0%, signal=2%	AAAS/SLC2A3
AC004696.2	-0.92869	-1.43011	0.0112897	2293	tags=10%, list=4%, signal=9%	OXSM/RPN1/PCBP2/ACTG2/MYH10/SLC3A2/FLNA/IPO4
AC106872.12	-0.898593	-1.43025	0.0259671	2198	tags=6%, list=4%, signal=6%	AAAS/ACTC1/SLC3A2/NDUFS2/EPAS1
AC022966.2	-0.724412	-1.43142	0.0103456	5564	tags=26%, list=10%, signal=24%	UBASH3B/ACTA1/CNOT1/MYL6/FLNA/MYH10/MYH9/MRPS17/PML/PDLIM1/IPO4/SPART/SAFB2/SLC2A3/ACTN4/NDUFA10/RUFY1/NSUN2/PPM1F/LRPPRC/NDUFA11/WASF2
MTND2P29	-0.974114	-1.43152	0.0263897	997	tags=6%, list=2%, signal=6%	AAAS/SAMM50/MYL6/DSTN/RPA1
AC073264.3	-0.937124	-1.43174	0.0120029	2185	tags=10%, list=4%, signal=9%	ACTN4/SART3/GCN1/DHX9/SLC3A2/STRAP/PCBP2/TARDBP
MSTN	-0.820905	-1.43311	0.0436135	713	tags=4%, list=1%, signal=4%	MRPS17/OXSM/ACTA1
RN7SL563P	-0.999746	-1.4384	0.0137812	17	tags=4%, list=0%, signal=4%	AAAS/HNRNPM/INF2
ARMC4P1	-0.817623	-1.44055	0.0239938	1420	tags=5%, list=3%, signal=5%	ABI2/BOP1/DBN1/SQSTM1
LINC02060	-0.896887	-1.44292	0.0298792	3199	tags=13%, list=6%, signal=12%	NLN/TNKS1BP1/NDUFC1/IPO7/DHX9/DSTN/MRPS17/GTF2I/MYL6/ACTG2/STRAP
LINC02650	-0.999618	-1.44337	0.0118997	23	tags=2%, list=0%, signal=2%	AAAS/IQGAP1
BNIP3P18	-0.948243	-1.44423	0.0270014	343	tags=4%, list=1%, signal=4%	NDUFA10/UBASH3B/MYH9
MIR340	-0.999037	-1.44429	0.0400724	55	tags=2%, list=0%, signal=2%	PDLIM1/NSUN2
YBX2P1	-0.916182	-1.44658	0.0225288	3183	tags=12%, list=6%, signal=11%	ARMC6/NLN/NDUFS2/NDUFS1/NUBPL/BOP1/SMPD4/SLC2A1/PRDX1/NDUFC1
RN7SL66P	-0.999764	-1.44667	0.00353245	15	tags=2%, list=0%, signal=2%	AAAS/FLNB
RHOA-IT1	-0.728694	-1.44668	0.0159911	5004	tags=25%, list=9%, signal=23%	RRP1/CHCHD3/IPO7/MYL6/DBN1/GTF2I/SLC7A11/SLC2A1/FLNA/RUFY1/ACTBL2/CAPZB/PRDX1/WASF2/NCKAP1/SQSTM1/MYH10/DHX9/BRK1/STRAP/SAMM50
AC024592.2	-0.818842	-1.44675	0.0273964	1654	tags=11%, list=3%, signal=10%	NLN/NSUN2/OXSM/GTF2I/AAAS/HNRNPM/SLC3A2/CD2AP/TNKS1BP1
SMIM31	-0.819589	-1.44694	0.0324622	4456	tags=14%, list=8%, signal=13%	ABI2/STRAP/NDUFA10/BRK1/RUFY1/WASF2/ANP32E/TARDBP/NDUFC1/INF2/PCBP2/NDUFA11
GGTLC5P	-0.898419	-1.44818	0.0157704	2137	tags=15%, list=4%, signal=15%	PRC1/SLC2A3/ANP32E/SLC7A11/ZHX2/NDUFA11/NSUN2/DSTN/OXSM/PRDX1/ACTG2/PDLIM1/ATXN10
LRRC3C	-0.76517	-1.44826	0.0193722	1971	tags=12%, list=4%, signal=11%	INF2/ATXN10/ARMC6/RPA1/GCN1/LRPPRC/DSTN/NSUN2/MYL6/CYFIP1
AC011487.3	-0.858516	-1.44947	0.0292369	3528	tags=13%, list=6%, signal=12%	UBASH3B/TNKS1BP1/EPAS1/DHX9/SLC3A2/RRP1/LRPPRC/NDUFC1/OXSM/NSUN2/HNRNPM
AC015563.1	-0.797292	-1.44997	0.0133365	5054	tags=10%, list=9%, signal=9%	CAPZB/ACTA2/NLN/TARDBP/ACTC1/NDUFA10/SLC3A2/ACTG1
RBMY2HP	-0.999655	-1.45172	0.0281422	21	tags=2%, list=0%, signal=2%	AAAS/ACTB
Z99129.1	-0.792293	-1.45831	0.0228289	3238	tags=12%, list=6%, signal=11%	CYFIP1/NUBPL/RRP1/NDUFS2/ARMC6/ACTG2/IPO4/ACTA1/ATXN10/FLNA
AS3MT	-0.824623	-1.4606	0.0159295	3785	tags=23%, list=7%, signal=21%	MRPS17/HNRNPM/NDUFC1/RNH1/ACTN4/NDUFS1/ABI2/ACTBL2/MYH9/ACTB/SLC2A3/HNRNPU/OXSM/ACTA2/TRIP6/TARDBP/ACTC1/CHD4/BOP1
RN7SL510P	-0.960358	-1.46151	0.0149865	2188	tags=8%, list=4%, signal=8%	MYH10/ACTA1/HNRNPU/SLC3A2/DSTN/CAPZB/IQGAP1
RNA5SP491	-0.965883	-1.46523	0.0347006	1884	tags=8%, list=3%, signal=8%	AAAS/RAC1/MYL6/NDUFS1/BOP1/TRIP6/DBN1
AC123786.2	-0.999618	-1.46632	0.0317083	23	tags=2%, list=0%, signal=2%	AAAS/SLC2A3
PPM1K-DT	-0.877442	-1.47262	0.0112755	2303	tags=12%, list=4%, signal=11%	HNRNPU/TRIP6/UBASH3B/IQGAP1/NLN/CHD4/FANCI/MYH9/PRDX1/ACTC1
CICP11	-0.967701	-1.47302	0.0135876	1783	tags=7%, list=3%, signal=7%	RRP1/ARMC6/ATXN10/DBN1/HNRNPH1/SLC2A3
OR4F1P	-0.999636	-1.4745	0.0482625	22	tags=2%, list=0%, signal=2%	ARMC6/OXSM
AL137139.3	-0.924396	-1.47485	0.0214966	2	tags=4%, list=0%, signal=4%	NDUFC1/CNOT1/RUFY1
PSMD12P1	-0.948609	-1.47501	0.0328542	2110	tags=12%, list=4%, signal=11%	TARDBP/PCBP2/ACTA2/UBASH3B/SAMM50/BRK1/RRP1/CAPZB/ACTB/CHCHD3
NPAP1P6	-0.999909	-1.4762	0.00553071	7	tags=2%, list=0%, signal=2%	AAAS/ACTA2
COQ7	-0.689628	-1.48044	0.0136912	4895	tags=29%, list=9%, signal=26%	SLC3A2/SMPD4/ARMC6/MYL6/LRPPRC/CD2AP/ACTA1/SLC7A11/CAPZB/MRPS17/MYH9/CYFIP1/IPO7/PRC1/HNRNPU/PPM1F/NCKAP1/ACTB/GCN1/INF2/TARDBP/CHCHD3/DSTN/BOP1
RN7SL804P	-0.999764	-1.48996	0.0183609	15	tags=2%, list=0%, signal=2%	AAAS/IPO4
C9orf131	-0.801826	-1.49039	0.0087314	3582	tags=12%, list=7%, signal=11%	HNRNPA3/ARMC6/SLC2A3/MYH9/NUBPL/IPO4/IPO7/STRAP/NLN/PPM1F
LINC00331	-0.999437	-1.4907	0.0233443	33	tags=2%, list=0%, signal=2%	AAAS/MRPS17
TBC1D3P2	-0.945615	-1.49439	0.0203832	702	tags=11%, list=1%, signal=11%	CAPZB/MRPS17/SAMM50/SLC2A3/DBN1/NDUFS2/NDUFA11/SLC2A1/STRAP
CCR6	-0.852052	-1.49711	0.0217004	257	tags=6%, list=0%, signal=6%	IPO4/RNH1/FLNB/DHX9/UBASH3B
RNA5SP65	-0.999927	-1.49825	0.000244336	6	tags=2%, list=0%, signal=2%	AAAS/SQSTM1
RNF133	-0.793454	-1.50007	0.0172334	4200	tags=13%, list=8%, signal=12%	IPO4/INF2/PML/UBASH3B/NDUFA10/TLN1/SLC2A3/GCN1/PCBP2/PRDX1/NDUFC1
NEK4P2	-0.999255	-1.50057	0.0288379	43	tags=2%, list=0%, signal=2%	AAAS/NUBPL
RN7SKP168	-0.999818	-1.50289	0.00129141	12	tags=2%, list=0%, signal=2%	AAAS/SAMM50
RNU1-150P	-0.999945	-1.50671	1e-10	5	tags=2%, list=0%, signal=2%	IQGAP1/RPA1
AL034372.1	-0.999727	-1.50921	0.0296268	17	tags=2%, list=0%, signal=2%	NDUFS1/TRIP6
LINC02702	-0.830964	-1.50956	0.00885152	2548	tags=12%, list=5%, signal=11%	SAFB2/OXSM/ANP32E/TRIP6/ACTA2/RUFY1/GYS1/PDLIM1/RRP1/ACTG1
OVOL1	-0.91946	-1.51035	0.00122361	1717	tags=8%, list=3%, signal=8%	TLN1/ACTA1/ABI2/CD2AP/NSUN2/MRPS17/DBN1
HMGB3P18	-0.9998	-1.51062	0.0188196	13	tags=2%, list=0%, signal=2%	AAAS/SAFB2
AP005119.2	-0.848484	-1.5168	0.0113276	1565	tags=15%, list=3%, signal=15%	SAMM50/NSUN2/HNRNPA3/CHD4/RPN1/ACTA1/WASF2/CNOT1/PCBP2/RNH1/FANCI/GYS1/FLNB
ZNF736P4Y	-0.999582	-1.52252	0.0308855	25	tags=2%, list=0%, signal=2%	AAAS/FLNA
RNA5SP425	-0.942334	-1.52354	0.00418786	2448	tags=10%, list=4%, signal=9%	ANP32E/STRAP/ACTA2/SLC7A11/SART3/NDUFC1/RUFY1/FLNA
RPL7AP8	-0.80816	-1.52395	0.00421249	4413	tags=20%, list=8%, signal=19%	NSUN2/PDLIM1/AAAS/CHD4/CAPZB/DHX9/MYH9/DSTN/SPART/NDUFA10/SAFB2/PCBP2/ACTA1/BRK1/PPM1F/IQGAP1/HNRNPU
AC087203.3	-0.940535	-1.53212	0.0014614	226	tags=6%, list=0%, signal=6%	GYS1/NDUFS1/FLNA/TLN1/RAC1
SNORD91B	-0.834392	-1.53212	0.0103889	4135	tags=10%, list=8%, signal=9%	DBN1/TLN1/LRPPRC/TRIP6/RAC1/SLC3A2/SART3/IPO7
AC006974.1	-0.968358	-1.53757	0.00136462	675	tags=5%, list=1%, signal=5%	NUBPL/NDUFA11/SLC2A3/MRPS17
SIGLEC29P	-0.999364	-1.54969	0.0406979	37	tags=2%, list=0%, signal=2%	AAAS/GCN1
AL049748.1	-0.999909	-1.55031	0.000180625	7	tags=2%, list=0%, signal=2%	AAAS/ACTA1
AL357558.1	-0.999982	-1.55399	0.00504123	3	tags=2%, list=0%, signal=2%	AAAS/INF2
LCEP2	-0.9998	-1.55488	1e-10	13	tags=2%, list=0%, signal=2%	AAAS/WASF2
SNORD114-25	-0.999691	-1.56723	0.0115636	19	tags=2%, list=0%, signal=2%	AAAS/INF2
AC006335.2	-0.999909	-1.57677	1.73707e-06	7	tags=2%, list=0%, signal=2%	AAAS/SLC3A2
POM121L12	-0.999909	-1.58423	0.000228768	7	tags=2%, list=0%, signal=2%	DHX9/CD2AP
AC073263.3	-0.999527	-1.58688	0.0270176	28	tags=2%, list=0%, signal=2%	AAAS/FLNB
AL133372.1	-0.999764	-1.60878	0.0194234	15	tags=2%, list=0%, signal=2%	AAAS/NDUFC1
AC005344.1	-0.999746	-1.60965	0.0158116	16	tags=2%, list=0%, signal=2%	ABI2/SAFB2
AC126773.1	-0.9996	-1.62053	0.00461938	24	tags=2%, list=0%, signal=2%	AAAS/PRDX1
MIR548B	-0.999691	-1.62385	0.00943885	19	tags=2%, list=0%, signal=2%	AAAS/BOP1
AL353072.1	-0.999873	-1.63198	0.00818522	9	tags=2%, list=0%, signal=2%	AAAS/FLNB
SNORD114-22	-0.999927	-1.65765	1e-10	6	tags=2%, list=0%, signal=2%	AAAS/IQGAP1
AL450472.3	-0.999764	-1.66387	0.00707347	15	tags=2%, list=0%, signal=2%	AAAS/EPAS1
AL035258.1	-0.999855	-1.69901	0.00186665	10	tags=2%, list=0%, signal=2%	AAAS/RPN1
AC005841.1	-0.999818	-1.69928	0.0257758	12	tags=2%, list=0%, signal=2%	AAAS/SAFB2
ABHD15-AS1	-0.9994	-1.70486	0.0374345	35	tags=2%, list=0%, signal=2%	ACTG1/IPO7
AC007495.1	-0.999709	-1.71078	0.0419945	18	tags=2%, list=0%, signal=2%	AAAS/RAC1
AC026991.2	-0.999509	-1.71285	0.0227958	29	tags=2%, list=0%, signal=2%	AAAS/CYFIP1
AL360169.1	-0.999927	-1.72438	0.00235013	6	tags=2%, list=0%, signal=2%	AAAS/STRAP
LINC02283	-0.999455	-1.73039	0.0490196	32	tags=2%, list=0%, signal=2%	AAAS/CHCHD3
AL935212.2	-0.999818	-1.7458	0.0164962	12	tags=2%, list=0%, signal=2%	AAAS/SQSTM1
AC239585.1	-0.999564	-1.75979	0.0121675	26	tags=2%, list=0%, signal=2%	AAAS/BOP1
MIR603	-0.999636	-1.76402	0.05	22	tags=2%, list=0%, signal=2%	AAAS/HNRNPH1
NFU1P2	-0.999782	-1.77112	0.00222153	14	tags=2%, list=0%, signal=2%	ACTC1/RUFY1
OR5D15P	-0.999709	-1.77152	0.0492958	18	tags=2%, list=0%, signal=2%	AAAS/TNKS1BP1
LINC00297	-0.999891	-1.77203	0.000894305	8	tags=2%, list=0%, signal=2%	AAAS/PML
RNA5SP75	-0.999437	-1.7807	0.046285	33	tags=2%, list=0%, signal=2%	AAAS/SQSTM1
AP006587.5	-0.999655	-1.7968	0.00926917	21	tags=2%, list=0%, signal=2%	AAAS/BOP1
RNU6-1175P	-0.9994	-1.79898	0.048733	36	tags=4%, list=0%, signal=4%	AAAS/ACTN4/ACTA1
AL035411.2	-0.999818	-1.80302	0.00132064	12	tags=2%, list=0%, signal=2%	AAAS/NDUFC1
AL512605.1	-0.999546	-1.80664	0.0401528	28	tags=4%, list=0%, signal=4%	FANCI/NSUN2/STRAP
AL158825.1	-0.999891	-1.82006	0.00241076	8	tags=2%, list=0%, signal=2%	AAAS/RUFY1
RNU6-1228P	-0.9998	-1.82123	0.00687214	13	tags=2%, list=0%, signal=2%	AAAS/NDUFS1
SNORD115-30	-0.999836	-1.83198	3.92274e-05	11	tags=2%, list=0%, signal=2%	AAAS/SLC2A1
TMEM225	-0.999746	-1.85513	0.0132351	16	tags=2%, list=0%, signal=2%	GCN1/FANCI
AP005435.3	-0.999818	-1.86231	0.0101363	12	tags=2%, list=0%, signal=2%	SLC2A1/ABI2
RN7SL150P	-1	-1.86683	0.000121329	2	tags=2%, list=0%, signal=2%	AAAS/NLN
TRIM64DP	-0.999673	-1.88311	0.0335021	20	tags=2%, list=0%, signal=2%	AAAS/PCBP2
AC004147.5	-0.999855	-1.89144	0.0140956	10	tags=2%, list=0%, signal=2%	AAAS/WASF2
RNU6-714P	-0.999418	-1.89589	0.0218031	34	tags=2%, list=0%, signal=2%	AAAS/ARMC6
AL136372.1	-0.999891	-1.902	0.0218305	8	tags=2%, list=0%, signal=2%	ACTA1/ARMC6
SNORD114-2	-0.999673	-1.90767	0.0253343	20	tags=2%, list=0%, signal=2%	AAAS/MYL6
MTND3P2	-0.999873	-1.91002	0.00473529	9	tags=2%, list=0%, signal=2%	CYFIP1/ACTA1
RN7SKP209	-0.999945	-1.91012	0.000946898	5	tags=2%, list=0%, signal=2%	SMPD4/PRC1
RN7SKP260	-0.999655	-1.93261	0.0458111	21	tags=2%, list=0%, signal=2%	AAAS/NDUFC1
AC021755.1	-0.999873	-1.94348	0.00160228	9	tags=2%, list=0%, signal=2%	AAAS/ACTA2
AC010196.1	-0.9998	-1.9524	0.00959233	13	tags=2%, list=0%, signal=2%	AAAS/ZHX2
RPL31P45	-0.999655	-1.95942	0.0283795	21	tags=2%, list=0%, signal=2%	FANCI/OXSM
AL645465.1	-0.999782	-1.96016	0.00195494	14	tags=2%, list=0%, signal=2%	AAAS/NDUFS1
RNU6-316P	-0.999855	-2.01764	0.0138365	10	tags=2%, list=0%, signal=2%	AAAS/CYFIP1
Z99497.1	-0.999836	-2.03138	0.00690023	11	tags=2%, list=0%, signal=2%	RRP1/GYS1
UBE2V1P8	-1	-2.03165	1e-10	2	tags=2%, list=0%, signal=2%	PRC1/BRK1
AL158058.2	-0.999673	-2.03943	0.0295111	21	tags=4%, list=0%, signal=4%	AAAS/ACTA2/INF2
TRAJ55	-0.999945	-2.06209	0.00117058	5	tags=2%, list=0%, signal=2%	AAAS/SMPD4
PLSCR5-AS1	-0.999982	-2.07032	1e-10	3	tags=2%, list=0%, signal=2%	LRPPRC/CHD4
ZDHHC20P2	-0.999927	-2.08806	0.0294931	6	tags=2%, list=0%, signal=2%	FLNA/UBASH3B
UBE2V1P14	-0.999945	-2.09643	0.00144525	5	tags=2%, list=0%, signal=2%	IQGAP1/PML
AC010745.4	-0.999909	-2.10872	0.0127106	7	tags=2%, list=0%, signal=2%	AAAS/RNH1
AL035250.2	-0.9998	-2.19559	0.0234481	13	tags=2%, list=0%, signal=2%	AAAS/PRC1
MIR4439	-0.999927	-2.21371	0.00703394	6	tags=2%, list=0%, signal=2%	AAAS/RRP1
AC092567.1	-0.999836	-2.2201	0.0123322	11	tags=2%, list=0%, signal=2%	AAAS/ACTG2
AC011467.2	-0.9996	-2.22654	0.0213007	24	tags=2%, list=0%, signal=2%	AAAS/FANCI
AL606662.1	-0.999927	-2.22681	0.0164962	6	tags=2%, list=0%, signal=2%	AAAS/SART3
RNA5SP432	-0.999655	-2.27508	0.0345902	21	tags=2%, list=0%, signal=2%	AAAS/SPART
MIR516A2	-0.999673	-2.27749	0.0463458	20	tags=2%, list=0%, signal=2%	AAAS/OXSM
AC016907.1	-0.999655	-2.28862	0.0451925	21	tags=2%, list=0%, signal=2%	AAAS/MYL6
FAM30C	-0.999618	-2.2966	0.039888	23	tags=2%, list=0%, signal=2%	AAAS/RPN1
DUX4L17	-0.999673	-2.30557	0.0325861	20	tags=2%, list=0%, signal=2%	AAAS/DBN1
AL359396.2	-1	-2.3059	0.000247544	2	tags=2%, list=0%, signal=2%	AAAS/SLC2A1
OR5G4P	-0.999945	-2.30899	0.00191079	5	tags=2%, list=0%, signal=2%	AAAS/SLC7A11
RNU6-642P	-0.999873	-2.33248	0.0198724	9	tags=2%, list=0%, signal=2%	AAAS/ACTBL2
AC226119.3	-0.999673	-2.33337	0.0259298	20	tags=2%, list=0%, signal=2%	AAAS/MRPS17
LRRC7-AS1	-1	-2.34367	0.00398784	2	tags=2%, list=0%, signal=2%	AAAS/ACTG1
SNORA36B	-0.999927	-2.34373	0.00779888	6	tags=2%, list=0%, signal=2%	AAAS/ACTB
AC093525.5	-0.999927	-2.37066	0.00213429	6	tags=2%, list=0%, signal=2%	AAAS/PML
TTTY4B	-0.9998	-2.384	0.0257138	13	tags=2%, list=0%, signal=2%	AAAS/HNRNPH1
RPS24P1	-0.999709	-2.39644	0.00389645	18	tags=2%, list=0%, signal=2%	AAAS/CHD4
AP003063.1	-0.999909	-2.39787	0.0037109	7	tags=2%, list=0%, signal=2%	AAAS/RAC1
OR2M1P	-0.999982	-2.40132	0.000279551	3	tags=2%, list=0%, signal=2%	AAAS/RUFY1
UBQLN4P2	-0.999782	-2.40209	0.0294285	14	tags=2%, list=0%, signal=2%	AAAS/MRPS17
SSXP1	-0.999909	-2.46029	0.0168082	7	tags=2%, list=0%, signal=2%	AAAS/EPAS1
RN7SL422P	-0.999746	-2.46258	0.0450724	16	tags=2%, list=0%, signal=2%	AAAS/WASF2
HBG1	-0.999691	-2.46526	0.0151408	19	tags=2%, list=0%, signal=2%	AAAS/SAFB2
NUTF2P5	-0.999727	-2.46835	0.014175	17	tags=2%, list=0%, signal=2%	SLC3A2/FLNB
RNU6-1244P	-0.999746	-2.48053	0.00358982	16	tags=2%, list=0%, signal=2%	AAAS/STRAP
AC105362.1	-0.9996	-2.51748	0.0292355	24	tags=2%, list=0%, signal=2%	AAAS/SART3
OOSP4A	-0.999964	-2.52916	0.000725238	4	tags=2%, list=0%, signal=2%	AAAS/SPART
RNU6-259P	-0.999964	-2.54486	0.000885258	4	tags=2%, list=0%, signal=2%	AAAS/LRPPRC
RN7SKP18	-0.999891	-2.54896	0.0128037	8	tags=2%, list=0%, signal=2%	AAAS/ACTB
AL133270.1	-0.999582	-2.59276	0.0212241	25	tags=2%, list=0%, signal=2%	AAAS/RAC1
ACTR3BP4	-0.999764	-2.62881	0.00806666	15	tags=2%, list=0%, signal=2%	AAAS/PPM1F
AC098825.1	-0.999818	-2.63423	0.0178979	12	tags=2%, list=0%, signal=2%	AAAS/ANP32E
SNRPGP13	-0.999836	-2.65406	0.0048866	11	tags=2%, list=0%, signal=2%	AAAS/NDUFA11
MIR651	-0.999873	-2.66875	0.0085135	9	tags=2%, list=0%, signal=2%	AAAS/RPN1
RNU7-120P	-0.999855	-2.69122	0.0123816	10	tags=2%, list=0%, signal=2%	AAAS/FLNA
MIR4266	-0.999891	-2.70285	0.00755886	8	tags=2%, list=0%, signal=2%	AAAS/INF2
AF228730.6	-0.999636	-2.70707	1e-10	23	tags=4%, list=0%, signal=4%	AAAS/ACTG2/FLNA
AC027176.1	-0.999964	-2.76893	0.00741432	4	tags=2%, list=0%, signal=2%	AAAS/DSTN
RNU4ATAC3P	-0.9998	-2.78926	0.0451351	14	tags=4%, list=0%, signal=4%	AAAS/BRK1/CHCHD3
AL445989.2	-0.999891	-2.79731	0.00117213	8	tags=2%, list=0%, signal=2%	AAAS/TRIP6
AC009509.3	-0.999909	-2.81222	0.00957708	7	tags=2%, list=0%, signal=2%	AAAS/SLC3A2
AC233992.2	-0.999746	-2.84686	0.0261343	16	tags=2%, list=0%, signal=2%	AAAS/SLC7A11
AC055788.2	-0.999618	-2.84793	0.0432157	23	tags=2%, list=0%, signal=2%	AAAS/RRP1
RPS29P33	-0.999673	-2.85022	0.0498008	20	tags=2%, list=0%, signal=2%	AAAS/CYFIP1
AC080112.2	-0.999673	-2.87459	0.0478927	20	tags=2%, list=0%, signal=2%	AAAS/LRPPRC
RN7SKP211	-0.999891	-2.88666	0.0190228	8	tags=2%, list=0%, signal=2%	AAAS/ACTG2
AC011351.1	-0.999727	-2.93439	0.0231036	17	tags=2%, list=0%, signal=2%	AAAS/NUBPL
AC005909.1	-0.999945	-2.94296	0.015325	6	tags=4%, list=0%, signal=4%	AAAS/GYS1/DBN1
PSPC1P2	-0.999927	-2.95746	0.0115531	6	tags=2%, list=0%, signal=2%	AAAS/HNRNPH1
CICP6	-0.999982	-2.98378	0.000107279	3	tags=2%, list=0%, signal=2%	AAAS/MRPS17
SGO1P2	-0.999727	-3.02038	0.0468165	17	tags=2%, list=0%, signal=2%	AAAS/RAC1
AL021397.1	-0.999945	-3.02088	0.027187	5	tags=2%, list=0%, signal=2%	AAAS/SLC3A2
RN7SL656P	-0.999746	-3.0438	0.0486753	16	tags=2%, list=0%, signal=2%	AAAS/PRDX1
LINC00575	-1	-3.06849	2.69913e-05	2	tags=2%, list=0%, signal=2%	AAAS/ACTG2
MIR1238	-0.999782	-3.08865	0.00267785	14	tags=2%, list=0%, signal=2%	AAAS/FANCI
AC022447.3	-0.999709	-3.11804	0.0363442	18	tags=2%, list=0%, signal=2%	AAAS/TNKS1BP1
LINC02329	-0.999873	-3.12261	0.0175561	9	tags=2%, list=0%, signal=2%	AAAS/OXSM
AC245389.1	-0.999782	-3.13571	0.0168423	14	tags=2%, list=0%, signal=2%	AAAS/FLNA
RNU2-61P	-0.999818	-3.1459	0.0367515	12	tags=2%, list=0%, signal=2%	PRDX1/SAMM50
DNM1P49	-0.999891	-3.15935	0.0303096	8	tags=2%, list=0%, signal=2%	AAAS/LRPPRC
AC010625.1	-0.999909	-3.18748	0.0250866	7	tags=2%, list=0%, signal=2%	AAAS/SLC3A2
TSPY20P	-0.999836	-3.25722	0.0226055	11	tags=2%, list=0%, signal=2%	AAAS/ACTA1
AL583854.1	-0.999818	-3.29303	0.0262994	12	tags=2%, list=0%, signal=2%	AAAS/BOP1
TMEM256P2	-0.999855	-3.31351	0.0400348	10	tags=2%, list=0%, signal=2%	AAAS/FANCI
RN7SKP81	-0.999873	-3.33808	0.0376633	9	tags=2%, list=0%, signal=2%	AAAS/BOP1
MIR548AJ1	-0.999782	-3.34871	0.0483559	14	tags=2%, list=0%, signal=2%	AAAS/RPN1
RN7SL640P	-0.999818	-3.35177	0.0314878	12	tags=2%, list=0%, signal=2%	AAAS/IQGAP1
SNORA71	-0.999855	-3.39704	0.0208647	10	tags=2%, list=0%, signal=2%	AAAS/NDUFA11
AC079945.1	-0.999909	-3.40885	0.0303049	7	tags=2%, list=0%, signal=2%	AAAS/SLC2A3
AC009902.1	-0.999855	-3.41932	0.0156285	10	tags=2%, list=0%, signal=2%	AAAS/ARMC6
RNU6-1212P	-0.999782	-3.59265	0.00332646	14	tags=2%, list=0%, signal=2%	AAAS/PRDX1
AC105094.1	-0.999891	-3.67703	0.00306505	8	tags=2%, list=0%, signal=2%	AAAS/SAFB2
DUX4L8	-0.999891	-3.70994	0.0307258	8	tags=2%, list=0%, signal=2%	AAAS/NDUFS2
AP000722.1	-0.999927	-3.72423	0.00724289	6	tags=2%, list=0%, signal=2%	AAAS/DHX9
AL590644.2	-0.999873	-3.74219	0.0439116	9	tags=2%, list=0%, signal=2%	AAAS/PDLIM1
AL035417.1	-0.999982	-3.83515	0.0317017	3	tags=2%, list=0%, signal=2%	AAAS/PRDX1
RNU6-1040P	-0.999927	-3.86288	0.021786	6	tags=2%, list=0%, signal=2%	AAAS/PRC1
OR5M10	-0.999964	-3.87656	0.00023828	4	tags=2%, list=0%, signal=2%	AAAS/TRIP6
RNU11-5P	-0.999964	-3.88099	0.00512739	4	tags=2%, list=0%, signal=2%	AAAS/MRPS17
LINC02272	-0.999982	-3.88978	0.0151105	3	tags=2%, list=0%, signal=2%	AAAS/NDUFA10
FP671120.10	-0.999891	-3.92269	0.00256453	8	tags=2%, list=0%, signal=2%	AAAS/CD2AP
RPL35AP22	-0.999836	-3.95894	0.0485644	11	tags=2%, list=0%, signal=2%	AAAS/MYL6
MTCO1P5	-0.999836	-3.97209	0.0337142	11	tags=2%, list=0%, signal=2%	AAAS/PDLIM1
AC025588.3	-0.999982	-3.98368	0.00760944	3	tags=2%, list=0%, signal=2%	AAAS/PDLIM1
MIR4652	-0.9998	-4.01178	0.0391494	13	tags=2%, list=0%, signal=2%	AAAS/WASF2
AC024341.1	-0.999746	-4.02779	0.0469449	16	tags=2%, list=0%, signal=2%	AAAS/ACTG1
AL645937.2	-1	-4.03686	5.31316e-05	2	tags=2%, list=0%, signal=2%	AAAS/EPAS1
RNU6-225P	-0.999964	-4.11057	0.000706266	4	tags=2%, list=0%, signal=2%	AAAS/INF2
MIR4460	-0.999982	-4.11224	0.0265292	3	tags=2%, list=0%, signal=2%	AAAS/TRIP6
SMARCE1P7	-0.999964	-4.14983	0.00917403	4	tags=2%, list=0%, signal=2%	AAAS/GCN1
AL390254.1	-0.999873	-4.19659	0.0138686	9	tags=2%, list=0%, signal=2%	AAAS/RRP1
AC009237.10	-0.999982	-4.25645	0.00270045	3	tags=2%, list=0%, signal=2%	AAAS/ACTB
AC017007.5	-0.999855	-4.363	0.00876199	10	tags=2%, list=0%, signal=2%	AAAS/TARDBP
TRIM60P15	-0.999909	-4.37354	0.0472185	7	tags=2%, list=0%, signal=2%	AAAS/DHX9
AC103987.2	-0.999891	-4.41543	0.0221583	8	tags=2%, list=0%, signal=2%	AAAS/ACTA2
SSXP5	-0.999782	-4.6073	0.0300695	14	tags=2%, list=0%, signal=2%	AAAS/ACTG2
MIR4259	-0.999945	-4.62411	0.00574046	5	tags=2%, list=0%, signal=2%	AAAS/ACTA2
AL512357.1	-0.9998	-4.6583	0.031768	13	tags=2%, list=0%, signal=2%	AAAS/NCKAP1
AF212831.1	-0.999782	-4.73021	0.0163682	15	tags=4%, list=0%, signal=4%	AAAS/SLC2A1/PDLIM1
AC091912.1	-0.999909	-4.77309	0.0131489	7	tags=2%, list=0%, signal=2%	AAAS/GCN1
AC026468.1	-0.999945	-4.96501	0.0114349	5	tags=2%, list=0%, signal=2%	AAAS/BOP1
AC115286.1	-0.999927	-4.96646	0.0413007	6	tags=2%, list=0%, signal=2%	AAAS/MRPS17
AC148477.9	-0.999945	-4.97831	0.0230275	5	tags=2%, list=0%, signal=2%	AAAS/HNRNPH1
LINC02239	-0.999982	-5.09182	0.0233049	3	tags=2%, list=0%, signal=2%	AAAS/ARMC6
AC027369.2	-0.999691	-5.34423	0.0492424	19	tags=2%, list=0%, signal=2%	AAAS/ATXN10
AC084741.1	-0.999945	-6.15718	0.0150803	5	tags=2%, list=0%, signal=2%	AAAS/STRAP
RNU6-612P	-0.999982	-8.56608	0.0145854	3	tags=2%, list=0%, signal=2%	AAAS/SAFB2

## Sheet: Table S3
%IncMSE_Positive (N=3436)
Gene	enrichmentScore	NES	pvalue	rank	leading_edge	core_enrichment
MTND1P7	1	9.01817	0.00745846	1	tags=1%, list=0%, signal=1%	ANP32E
LINC01803	0.999982	8.6388	0.000964562	2	tags=1%, list=0%, signal=1%	RAC1
AC018846.1	0.999982	7.74865	0.00806666	2	tags=1%, list=0%, signal=1%	PPM1F
RN7SKP67	0.999909	7.59395	0.0119066	6	tags=1%, list=0%, signal=1%	SQSTM1
RPEP6	0.999964	6.8658	0.0252522	3	tags=1%, list=0%, signal=1%	MRPS17
OR51A1P	0.9998	6.62768	0.0489005	12	tags=1%, list=0%, signal=1%	ACTN4
TFAMP2	0.999909	6.41355	0.0413825	6	tags=1%, list=0%, signal=1%	RPN1
MIR6795	0.999982	6.25559	0.0147563	2	tags=1%, list=0%, signal=1%	ACTG1
RNU6-793P	0.999836	6.23999	0.0489005	10	tags=1%, list=0%, signal=1%	NLN
PHKG1P2	0.999982	6.23972	0.0081365	2	tags=1%, list=0%, signal=1%	HNRNPH1
AC104057.1	0.999964	5.45691	0.00506987	3	tags=1%, list=0%, signal=1%	RRP1
SPATA31E3P	0.999982	5.06672	0.0157401	2	tags=1%, list=0%, signal=1%	NDUFS1
RNU1-112P	0.999636	4.85377	0.049505	21	tags=1%, list=0%, signal=1%	RRP1
NAMPTP2	1	4.58541	0.00741432	1	tags=1%, list=0%, signal=1%	ARMC6
DEFB115	0.999964	4.5531	0.00796411	3	tags=1%, list=0%, signal=1%	FLNA
RNA5SP261	0.999873	4.54991	0.025126	8	tags=1%, list=0%, signal=1%	ACTBL2
MTND4P1	0.999873	4.54768	0.0458227	8	tags=1%, list=0%, signal=1%	NSUN2
RN7SKP291	0.9998	4.49252	0.029543	12	tags=1%, list=0%, signal=1%	NDUFS2
AC020549.1	1	4.44548	6.78546e-06	1	tags=1%, list=0%, signal=1%	MYL6
AC010202.1	0.999764	4.32641	0.0337088	14	tags=1%, list=0%, signal=1%	SLC2A1
MIR5705	0.999945	4.25368	0.0158591	4	tags=1%, list=0%, signal=1%	LRPPRC
AC113189.2	1	4.18227	0.000233904	1	tags=1%, list=0%, signal=1%	DHX9
AC140878.1	0.999873	4.15729	0.0315699	8	tags=1%, list=0%, signal=1%	CHCHD3
OR52S1P	0.999782	4.09496	0.0272973	13	tags=1%, list=0%, signal=1%	EPAS1
AC097494.1	0.999764	4.07366	0.0355552	14	tags=1%, list=0%, signal=1%	SQSTM1
ZNF519P3	0.999909	3.92845	0.0433514	6	tags=1%, list=0%, signal=1%	INF2
AC087518.1	0.999836	3.85335	0.0266843	10	tags=1%, list=0%, signal=1%	NLN
OR1L4	0.999909	3.85071	0.00535939	6	tags=1%, list=0%, signal=1%	NDUFC1
RNU6-1106P	1	3.84776	0.00047693	1	tags=1%, list=0%, signal=1%	MYL6
AC090985.1	0.999982	3.82055	0.0078151	2	tags=1%, list=0%, signal=1%	SAFB2
RPL36AP14	0.999891	3.80518	0.0154189	7	tags=1%, list=0%, signal=1%	BOP1
AC099654.12	0.999891	3.78304	0.00760944	7	tags=1%, list=0%, signal=1%	TLN1
Z99497.2	0.999891	3.783	0.0151408	7	tags=1%, list=0%, signal=1%	DSTN
AC090136.2	1	3.67349	0.000222549	1	tags=1%, list=0%, signal=1%	SART3
MTCO3P18	0.999873	3.60405	0.0154189	8	tags=1%, list=0%, signal=1%	RPA1
RN7SKP252	0.999782	3.60211	0.0466489	13	tags=1%, list=0%, signal=1%	IPO4
OR2X1P	0.999927	3.54586	0.0283834	5	tags=1%, list=0%, signal=1%	RUFY1
AC090457.1	0.999873	3.44631	0.0284899	8	tags=1%, list=0%, signal=1%	WASF2
AP003485.1	0.999945	3.39733	0.0409768	4	tags=1%, list=0%, signal=1%	PPM1F
RNU6-804P	0.999764	3.36665	0.0348963	14	tags=1%, list=0%, signal=1%	CHD4
AC107024.1	0.999636	3.32363	0.0475285	21	tags=1%, list=0%, signal=1%	NDUFA11
AL592161.1	0.999691	3.26648	0.0284899	18	tags=1%, list=0%, signal=1%	EPAS1
MIR6718	0.999891	3.25776	0.00385628	7	tags=1%, list=0%, signal=1%	UBASH3B
RN7SL713P	0.999855	3.24516	0.0273235	9	tags=1%, list=0%, signal=1%	HNRNPU
OR5M5P	0.999891	3.21522	0.00101964	7	tags=1%, list=0%, signal=1%	CNOT1
SNORD115-28	0.999927	3.17169	0.00754832	5	tags=1%, list=0%, signal=1%	RPN1
AC090312.2	0.999964	3.17131	0.0105165	3	tags=1%, list=0%, signal=1%	GCN1
AL355390.2	0.999818	3.11431	0.0454263	11	tags=1%, list=0%, signal=1%	WASF2
AC018448.2	0.999891	3.09618	0.014446	7	tags=1%, list=0%, signal=1%	HNRNPH1
AC093909.2	0.999964	3.07931	0.000518354	3	tags=1%, list=0%, signal=1%	ACTA2
SNORD63	0.999964	3.05831	0.00186858	3	tags=1%, list=0%, signal=1%	TRIP6
AC073336.1	0.999927	3.05621	0.0227234	5	tags=1%, list=0%, signal=1%	NCKAP1
AC091951.2	0.999782	3.04246	0.0378065	13	tags=1%, list=0%, signal=1%	HNRNPU
AC103810.6	0.999655	3.03867	0.0364569	20	tags=1%, list=0%, signal=1%	SLC2A3
AL133268.2	1	2.93896	5.69724e-05	1	tags=1%, list=0%, signal=1%	CD2AP
AC021979.1	0.999927	2.91758	0.00173611	5	tags=1%, list=0%, signal=1%	CNOT1
AC121334.2	0.999964	2.86023	1e-10	3	tags=1%, list=0%, signal=1%	DBN1
AC079298.2	0.999909	2.83467	0.00713294	6	tags=1%, list=0%, signal=1%	NDUFS2
RNU4-11P	0.999746	2.78955	0.0225532	15	tags=1%, list=0%, signal=1%	ACTB
RPS15AP32	0.999818	2.77085	0.0306152	11	tags=1%, list=0%, signal=1%	BOP1
H3P19	0.999818	2.75044	0.0117731	11	tags=1%, list=0%, signal=1%	RAC1
THOC3-AS1	0.999746	2.70236	0.0393166	15	tags=1%, list=0%, signal=1%	ACTC1
MIR3691	0.999818	2.66376	0.0464707	11	tags=1%, list=0%, signal=1%	INF2
LINC01100	0.999746	2.65524	0.0385429	15	tags=1%, list=0%, signal=1%	INF2
OR6X1	0.999927	2.65319	0.00346351	5	tags=1%, list=0%, signal=1%	ZHX2
AC019322.3	0.999945	2.64727	0.00760614	4	tags=1%, list=0%, signal=1%	ABI2
MTCO1P38	1	2.61546	0.00356247	1	tags=1%, list=0%, signal=1%	CHD4
LINC01377	0.999891	2.61079	0.0347839	7	tags=1%, list=0%, signal=1%	ATXN10
RN7SL466P	0.999964	2.58022	0.00387225	3	tags=1%, list=0%, signal=1%	ATXN10
AL592076.1	0.999982	2.55604	0.00650899	2	tags=1%, list=0%, signal=1%	HNRNPU
AC234771.2	0.999764	2.54823	0.0389237	14	tags=1%, list=0%, signal=1%	PRDX1
AP000532.2	0.999782	2.5059	0.0394588	13	tags=1%, list=0%, signal=1%	IPO4
RN7SKP246	0.999891	2.4666	0.00696123	7	tags=1%, list=0%, signal=1%	RUFY1
AL591222.2	0.999982	2.43911	0.000242824	2	tags=1%, list=0%, signal=1%	NDUFA10
MOB1AP1	0.9998	2.42166	0.0207475	12	tags=1%, list=0%, signal=1%	CHD4
AL137847.3	0.999873	2.40748	0.0229337	8	tags=1%, list=0%, signal=1%	RUFY1
SPECC1P2	0.999982	2.36149	1.683e-06	2	tags=1%, list=0%, signal=1%	HNRNPH1
AC124891.1	0.999782	2.3475	0.0344239	13	tags=1%, list=0%, signal=1%	GCN1
MIR4267	0.999855	2.3347	0.00334495	9	tags=1%, list=0%, signal=1%	HNRNPM
AP005436.3	0.999582	2.31687	0.0211022	24	tags=1%, list=0%, signal=1%	NDUFS1
AC089998.2	0.999836	2.30914	0.0200225	10	tags=1%, list=0%, signal=1%	ACTB
AC067969.2	0.999909	2.25877	0.0307391	6	tags=1%, list=0%, signal=1%	RUFY1
RNU6-23P	0.999727	2.25758	0.0412775	16	tags=1%, list=0%, signal=1%	GCN1
AC118653.1	0.999982	2.25164	0.000249158	2	tags=1%, list=0%, signal=1%	RRP1
RAD54L2P1	0.999909	2.23162	0.00692277	6	tags=1%, list=0%, signal=1%	PRC1
RN7SL41P	0.999655	2.20424	0.0485612	20	tags=1%, list=0%, signal=1%	MRPS17
AC016292.1	0.999982	2.19407	8.16275e-05	2	tags=1%, list=0%, signal=1%	MYH10
AC140658.1	0.999964	2.18877	0.00112574	3	tags=1%, list=0%, signal=1%	PRC1
Z85994.2	1	2.17561	3.17275e-06	1	tags=1%, list=0%, signal=1%	ABI2
EIF5P2	0.999746	2.16105	0.0313944	15	tags=1%, list=0%, signal=1%	TARDBP
RNU6-1227P	0.999855	2.1527	0.00575696	9	tags=1%, list=0%, signal=1%	SART3
MIR3688-1	0.999727	2.13547	0.01561	16	tags=1%, list=0%, signal=1%	NUBPL
AC019159.2	0.999673	2.10941	0.0287053	19	tags=1%, list=0%, signal=1%	NDUFA11
AL450469.2	0.999855	2.10866	0.0124292	9	tags=1%, list=0%, signal=1%	WASF2
RNU6-887P	0.999655	2.09739	0.0475201	20	tags=1%, list=0%, signal=1%	ACTA1
AC108515.1	0.999818	2.09711	0.0240339	11	tags=1%, list=0%, signal=1%	ACTBL2
AC010620.2	1	2.09563	5.87424e-06	2	tags=2%, list=0%, signal=2%	IPO7/ANP32E
AC091435.1	0.999764	2.08724	0.0144737	14	tags=1%, list=0%, signal=1%	SART3
AC217774.1	0.999727	2.08402	0.0233399	16	tags=1%, list=0%, signal=1%	AAAS
RNU6-266P	0.999636	2.07725	0.0390386	21	tags=1%, list=0%, signal=1%	SLC2A1
MIR1285-2	0.999818	2.06863	0.0219405	11	tags=1%, list=0%, signal=1%	PCBP2
AC084373.1	0.999927	2.0608	0.00108132	5	tags=1%, list=0%, signal=1%	PPM1F
DUXAP2	0.9996	2.05144	0.0489642	23	tags=1%, list=0%, signal=1%	WASF2
AC241377.1	0.999691	2.0204	0.0462369	18	tags=1%, list=0%, signal=1%	ACTB
OR2T1	1	2.0201	0.000106588	1	tags=1%, list=0%, signal=1%	OXSM
GAGE12H	0.999655	2.00744	0.0459559	21	tags=2%, list=0%, signal=2%	ACTG2/GYS1
ST13P14	0.999982	2.00374	0.0288075	2	tags=1%, list=0%, signal=1%	DBN1
AC079382.1	0.999964	2.00157	0.00378602	3	tags=1%, list=0%, signal=1%	IQGAP1
AC009835.1	0.999782	1.98625	0.0212769	13	tags=1%, list=0%, signal=1%	GCN1
CYP46A4P	0.999418	1.96351	0.0201609	33	tags=1%, list=0%, signal=1%	ACTC1
MIR412	0.999891	1.93968	1e-10	7	tags=1%, list=0%, signal=1%	NDUFS2
OR7E90P	0.999655	1.93626	0.020052	20	tags=1%, list=0%, signal=1%	GCN1
VDAC2P1	0.999582	1.90976	0.0448276	24	tags=1%, list=0%, signal=1%	PPM1F
RPLP1P10	0.999546	1.90289	0.0217219	26	tags=1%, list=0%, signal=1%	CD2AP
RN7SKP183	0.999509	1.88926	0.0193381	28	tags=1%, list=0%, signal=1%	ACTA1
KRTAP2-4	0.999964	1.86454	1e-10	3	tags=1%, list=0%, signal=1%	INF2
AC008572.1	0.999709	1.85429	0.0228932	17	tags=1%, list=0%, signal=1%	NDUFA10
RN7SL178P	0.999927	1.85199	0.0132085	5	tags=1%, list=0%, signal=1%	AAAS
AC005341.1	0.999764	1.84676	0.0145293	14	tags=1%, list=0%, signal=1%	ANP32E
SPACA5B	0.999855	1.82713	0.0010198	9	tags=1%, list=0%, signal=1%	MYH10
MIR1185-2	0.999836	1.81698	1e-10	10	tags=1%, list=0%, signal=1%	GTF2I
AC024132.2	0.999964	1.81445	0.0178786	3	tags=1%, list=0%, signal=1%	RRP1
H2BL1P	0.999655	1.81056	0.0480769	20	tags=1%, list=0%, signal=1%	NSUN2
AC021269.2	0.999855	1.77754	0.00796147	9	tags=1%, list=0%, signal=1%	SAMM50
OR5F2P	0.999746	1.7745	0.0416111	15	tags=1%, list=0%, signal=1%	IPO4
AC122688.2	0.999709	1.77069	0.0468196	17	tags=1%, list=0%, signal=1%	PML
OR51H2P	0.999927	1.76093	0.010768	5	tags=1%, list=0%, signal=1%	UBASH3B
MIR449C	0.999891	1.75205	0.000237786	7	tags=1%, list=0%, signal=1%	SPART
MIR522	0.999818	1.74082	0.00468852	11	tags=1%, list=0%, signal=1%	FLNB
CHEK2P3	0.9998	1.72065	0.0145014	12	tags=1%, list=0%, signal=1%	ANP32E
AC097491.1	0.999836	1.71894	0.01341	10	tags=1%, list=0%, signal=1%	RUFY1
MIR4436A	1	1.71843	0.000222118	1	tags=1%, list=0%, signal=1%	ABI2
LINC00333	0.999945	1.70656	0.0137798	4	tags=1%, list=0%, signal=1%	AAAS
AZU1P1	0.999873	1.70378	1e-10	8	tags=1%, list=0%, signal=1%	STRAP
KRTAP4-16	0.999891	1.69978	0.000322114	7	tags=1%, list=0%, signal=1%	GCN1
BSNDP4	0.999655	1.69731	0.0315543	20	tags=1%, list=0%, signal=1%	FANCI
RNU6-189P	0.999945	1.68806	0.0105647	4	tags=1%, list=0%, signal=1%	NLN
AC100868.1	0.999727	1.67723	0.0069871	16	tags=1%, list=0%, signal=1%	MRPS17
RNU6-967P	0.999855	1.66892	0.00126126	9	tags=1%, list=0%, signal=1%	SAMM50
AC123784.1	0.9998	1.66165	0.00903288	12	tags=1%, list=0%, signal=1%	AAAS
H2BP5	1	1.64188	1e-10	1	tags=1%, list=0%, signal=1%	RPN1
OR8B1P	0.999909	1.63841	0.00679758	6	tags=1%, list=0%, signal=1%	RRP1
LIMS4	0.999582	1.63792	0.0329565	24	tags=1%, list=0%, signal=1%	EPAS1
RNA5SP367	0.999709	1.63469	0.0176548	17	tags=1%, list=0%, signal=1%	HNRNPU
AC073614.1	0.999982	1.62543	5.10293e-05	2	tags=1%, list=0%, signal=1%	ZHX2
MIR5088	0.999855	1.61548	0.0191987	9	tags=1%, list=0%, signal=1%	SLC7A11
AC112702.1	0.999891	1.60535	0.0134915	7	tags=1%, list=0%, signal=1%	SMPD4
RN7SL357P	0.999636	1.60317	0.0324118	21	tags=1%, list=0%, signal=1%	SPART
TSPY16P	0.999891	1.58677	0.0108781	7	tags=1%, list=0%, signal=1%	RPN1
AC011516.1	0.999764	1.56519	1e-10	14	tags=1%, list=0%, signal=1%	IPO7
AC016383.1	0.9998	1.5602	0.0022421	12	tags=1%, list=0%, signal=1%	INF2
BSNDP1	0.999691	1.55794	0.00113198	18	tags=1%, list=0%, signal=1%	ACTB
BX510359.7	0.999909	1.55766	0.0455683	6	tags=1%, list=0%, signal=1%	NDUFA11
OR7E156P	0.9994	1.53738	0.0322553	34	tags=1%, list=0%, signal=1%	ACTA1
POMZP3	0.867069	1.5308	0.000856987	1843	tags=19%, list=3%, signal=18%	PRC1/ABI2/RAC1/CHD4/GYS1/MYL6/RRP1/ZHX2/NDUFC1/TRIP6/RUFY1/TARDBP/TNKS1BP1/CNOT1/ATXN10/RNH1
HNRNPA3P12	0.901977	1.52968	0.000411879	2169	tags=18%, list=4%, signal=17%	HNRNPA3/HNRNPH1/TARDBP/SART3/MYL6/DHX9/FANCI/HNRNPU/ACTG2/GTF2I/BRK1/CYFIP1/PDLIM1/IQGAP1/ACTN4
UGDH	0.879594	1.521	0.00500222	1107	tags=12%, list=2%, signal=12%	SQSTM1/NLN/PRDX1/GYS1/HNRNPU/NSUN2/GCN1/CYFIP1/WASF2/RUFY1
RPL23AP45	0.999818	1.51167	0.010138	11	tags=1%, list=0%, signal=1%	AAAS
EMC3	0.871888	1.50796	0.0011094	1095	tags=13%, list=2%, signal=13%	BRK1/SLC3A2/SQSTM1/OXSM/PRDX1/SLC7A11/CHCHD3/RNH1/RPN1/NDUFS2/NLN
FAM207BP	0.81934	1.50443	0.00709692	3186	tags=20%, list=6%, signal=19%	RRP1/ACTG1/PCBP2/HNRNPA3/BRK1/WASF2/CAPZB/GYS1/PML/PRDX1/HNRNPM/ATXN10/SLC2A1/RAC1/ACTB/IPO4/GCN1
CNN1	0.937668	1.50233	0.000557104	1249	tags=11%, list=2%, signal=10%	ACTA2/ACTG2/FLNA/ACTC1/NCKAP1/TRIP6/OXSM/CHCHD3/STRAP
IMP4	0.897709	1.49871	0.00212355	1306	tags=14%, list=2%, signal=14%	BOP1/NDUFA10/BRK1/RRP1/RAC1/NDUFS2/MYL6/PPM1F/MRPS17/RUFY1/OXSM/ABI2
ERH	0.916467	1.49869	0.000365245	1347	tags=20%, list=2%, signal=20%	HNRNPA3/TARDBP/BRK1/CHD4/AAAS/PCBP2/HNRNPM/DHX9/RPN1/ANP32E/HNRNPU/SART3/BOP1/FANCI/MYL6/ABI2/NLN
DEFB119	0.9998	1.49737	0.0227663	12	tags=1%, list=0%, signal=1%	NDUFA10
AC090525.3	1	1.49659	1e-10	1	tags=1%, list=0%, signal=1%	CD2AP
AL008718.3	0.864511	1.49626	0.00659235	1067	tags=12%, list=2%, signal=12%	HNRNPH1/DBN1/GCN1/NDUFA10/CNOT1/EPAS1/DHX9/CHD4/TARDBP/IPO4
IBA57	0.870737	1.49423	0.00201169	2388	tags=19%, list=4%, signal=18%	GCN1/NDUFS2/PPM1F/LRPPRC/OXSM/NDUFA10/INF2/SMPD4/WASF2/IPO7/BRK1/TRIP6/GYS1/RRP1/BOP1/RUFY1
POLR3G	0.875128	1.49409	0.000698785	1886	tags=12%, list=3%, signal=12%	SLC2A1/NLN/PRDX1/RRP1/NSUN2/RUFY1/SQSTM1/TRIP6/HNRNPA3/MYL6
TAF13P2	1	1.49009	0.00674876	1	tags=1%, list=0%, signal=1%	UBASH3B
COX5BP6	0.852998	1.49005	0.00448531	2805	tags=20%, list=5%, signal=19%	ABI2/HNRNPH1/GYS1/ACTA1/WASF2/UBASH3B/RPA1/HNRNPA3/CHD4/TLN1/DBN1/SART3/ACTC1/TNKS1BP1/FLNB/PCBP2/RNH1
AC006366.1	0.999855	1.48954	0.00172855	9	tags=1%, list=0%, signal=1%	INF2
AC106742.1	0.999455	1.4888	0.0479552	31	tags=1%, list=0%, signal=1%	SLC2A3
TRIM21	0.890946	1.48833	0.000971188	2384	tags=18%, list=4%, signal=17%	RNH1/PML/DHX9/CAPZB/TNKS1BP1/TLN1/WASF2/ARMC6/RPA1/HNRNPA3/IPO7/NDUFS2/CHD4/CD2AP/CYFIP1
DERA	0.846139	1.48792	0.00340633	2795	tags=17%, list=5%, signal=16%	STRAP/CHCHD3/MYH9/RPN1/BOP1/TRIP6/MYH10/SLC7A11/IPO7/ARMC6/ACTA2/ABI2/MYL6/PRC1
SEC13	0.916885	1.48717	0.000204048	1845	tags=24%, list=3%, signal=23%	BRK1/CAPZB/RPN1/PCBP2/HNRNPM/MYL6/OXSM/SAFB2/SLC7A11/PRDX1/GCN1/NDUFA10/FLNB/FANCI/TARDBP/HNRNPA3/RNH1/STRAP/SLC2A1/ZHX2
NKX2-6	0.999582	1.48544	0.0461538	24	tags=1%, list=0%, signal=1%	PPM1F
SNORA1B	0.9998	1.48213	0.00400096	12	tags=1%, list=0%, signal=1%	RPN1
RFXAP	0.947181	1.48175	1.92616e-05	763	tags=14%, list=1%, signal=14%	HNRNPU/HNRNPA3/DHX9/SART3/ABI2/HNRNPH1/FANCI/RPA1/HNRNPM/ANP32E/SAFB2/GYS1
AC026273.1	0.847645	1.47777	0.00146628	2692	tags=12%, list=5%, signal=11%	NLN/SQSTM1/PRDX1/RUFY1/BRK1/ACTB/SLC7A11/FANCI/CD2AP/SLC2A3
UBE2R2-AS1	0.91612	1.47774	0.00217683	1297	tags=15%, list=2%, signal=15%	HNRNPU/HNRNPH1/SART3/SAFB2/NUBPL/CHCHD3/GCN1/SMPD4/CNOT1/AAAS/GYS1/TARDBP/TNKS1BP1
ZNF277	0.846672	1.47714	0.0051811	2703	tags=24%, list=5%, signal=23%	IPO7/CYFIP1/CNOT1/ATXN10/CHCHD3/TRIP6/RNH1/MYH9/LRPPRC/CD2AP/SLC3A2/SQSTM1/ACTA1/ARMC6/AAAS/ACTA2/PDLIM1/DSTN/NUBPL/NLN
ACTR6	0.908292	1.4768	0.000998341	1567	tags=25%, list=3%, signal=24%	SART3/DHX9/NCKAP1/HNRNPU/GCN1/AAAS/CD2AP/LRPPRC/HNRNPA3/HNRNPM/CNOT1/CYFIP1/NDUFS1/TARDBP/RPA1/ARMC6/SQSTM1/NUBPL/NDUFA10/NDUFA11/STRAP
MIR3164	0.888945	1.47597	0.0026085	2756	tags=10%, list=5%, signal=9%	IPO7/NDUFS2/NLN/PDLIM1/ACTG2/ARMC6/SAMM50/RNH1
TMEM63B	0.893536	1.47539	0.00566752	3142	tags=30%, list=6%, signal=28%	CD2AP/CNOT1/CYFIP1/GTF2I/SAFB2/MYH9/INF2/HNRNPU/NDUFS2/SMPD4/ACTA1/LRPPRC/ATXN10/TNKS1BP1/HNRNPM/ACTC1/TRIP6/ACTG1/IPO7/PDLIM1/NDUFS1/AAAS/SART3/CHCHD3/MYH10
AKR1B15	0.882274	1.47536	0.00779667	1981	tags=13%, list=4%, signal=13%	NLN/PRDX1/SQSTM1/INF2/BOP1/PML/ZHX2/MYH10/CHD4/RRP1/TLN1
TTC1	0.889693	1.47309	0.0167741	2811	tags=29%, list=5%, signal=27%	RUFY1/PRDX1/BRK1/MYL6/SLC2A1/CAPZB/SQSTM1/NDUFA11/NLN/NSUN2/SAMM50/RNH1/RRP1/NDUFA10/PCBP2/NDUFS2/SLC7A11/GTF2I/MRPS17/TARDBP/AAAS/OXSM/STRAP/SAFB2
HADHB	0.852448	1.47286	0.00414209	1613	tags=14%, list=3%, signal=14%	NDUFS1/GTF2I/ATXN10/PRDX1/SAMM50/LRPPRC/NDUFA10/OXSM/TLN1/ACTG2/CHCHD3/MRPS17
DUX4L47	1	1.47213	1e-10	1	tags=1%, list=0%, signal=1%	HNRNPU
UNC119B	0.926129	1.47152	0.000883727	1129	tags=19%, list=2%, signal=19%	GCN1/HNRNPM/RPA1/SART3/PPM1F/ABI2/WASF2/DHX9/LRPPRC/SMPD4/CD2AP/MYH10/GYS1/STRAP/NLN/SPART
AL118506.1	0.857046	1.47087	0.00195499	3335	tags=19%, list=6%, signal=18%	GYS1/CNOT1/SART3/SMPD4/PRC1/CAPZB/GTF2I/ANP32E/OXSM/NDUFS1/PML/ARMC6/AAAS/BOP1/NUBPL/UBASH3B
RAB13	0.873129	1.47057	0.00379566	1606	tags=12%, list=3%, signal=12%	CHD4/NDUFA11/GTF2I/TARDBP/NDUFS1/FANCI/SLC7A11/ACTA1/SART3/SLC2A1
PPP2R3C	0.853835	1.46964	0.00254562	3249	tags=24%, list=6%, signal=22%	TARDBP/HNRNPM/BRK1/PCBP2/ATXN10/CAPZB/WASF2/RAC1/STRAP/ZHX2/CNOT1/SART3/GCN1/SPART/TLN1/NDUFA10/NDUFS1/PPM1F/SMPD4/RNH1
UCHL3	0.878567	1.46947	0.0024335	1757	tags=13%, list=3%, signal=13%	NDUFA11/CHD4/CNOT1/MYL6/BRK1/SLC7A11/GTF2I/GYS1/IPO4/RNH1/BOP1
TXNRD1	0.930805	1.46913	0.00422107	1726	tags=20%, list=3%, signal=20%	PRDX1/SQSTM1/NLN/SLC7A11/NSUN2/GCN1/BOP1/SLC2A1/ZHX2/WASF2/CNOT1/CHCHD3/NDUFS1/ACTA1/NDUFA11/RNH1/LRPPRC
AC138230.1	0.857435	1.46843	0.00293372	1711	tags=19%, list=3%, signal=18%	RRP1/NDUFA11/CHD4/BRK1/MYL6/TRIP6/PRC1/TLN1/MRPS17/GTF2I/EPAS1/ANP32E/NDUFS2/PRDX1/RUFY1/RPN1
ADCK5	0.88385	1.46778	0.0131023	2433	tags=14%, list=4%, signal=14%	BOP1/RRP1/IPO4/PRC1/PRDX1/IQGAP1/ZHX2/SAMM50/ATXN10/RNH1/NLN/RAC1
CBX4	0.848711	1.46736	0.00242818	2802	tags=20%, list=5%, signal=19%	SAFB2/FANCI/SMPD4/HNRNPH1/SART3/ANP32E/RUFY1/GCN1/IPO7/RNH1/ABI2/PCBP2/ACTG1/NUBPL/AAAS/IPO4/CAPZB
EXOSC8	0.911525	1.46696	0.000322505	1171	tags=18%, list=2%, signal=18%	HNRNPU/HNRNPA3/AAAS/HNRNPM/PCBP2/SART3/DHX9/ANP32E/SAFB2/SMPD4/HNRNPH1/BOP1/RPA1/SAMM50/PRC1
RN7SL716P	0.836905	1.46374	0.00805511	2358	tags=10%, list=4%, signal=9%	CNOT1/ABI2/DHX9/CYFIP1/SMPD4/NDUFC1/ARMC6/ZHX2
RNA5SP105	0.957595	1.46275	0.0252245	2339	tags=7%, list=4%, signal=7%	ACTA2/BRK1/HNRNPM/HNRNPH1/ACTN4/TNKS1BP1
MED25	0.934853	1.46241	0.000285095	1038	tags=13%, list=2%, signal=13%	SAFB2/GYS1/AAAS/SMPD4/RPA1/HNRNPM/ACTN4/SART3/NDUFA11/PML/NCKAP1
VDAC1P7	0.889408	1.46115	0.00224479	3151	tags=12%, list=6%, signal=11%	PCBP2/DSTN/DBN1/STRAP/TARDBP/RAC1/GYS1/NDUFA11/SLC3A2/EPAS1
MED6	0.899997	1.46106	0.000731948	1952	tags=20%, list=4%, signal=20%	SART3/PCBP2/AAAS/HNRNPM/HNRNPA3/TARDBP/SMPD4/DHX9/HNRNPH1/CHD4/BRK1/NCKAP1/RPN1/CAPZB/SQSTM1/RAC1/ACTG1
VPS33A	0.906853	1.46082	0.00054396	969	tags=14%, list=2%, signal=14%	HNRNPU/GCN1/RRP1/TARDBP/AAAS/BRK1/HNRNPM/ARMC6/SART3/LRPPRC/MRPS17/SLC7A11
RPL23AP82	0.892874	1.46034	0.00184703	789	tags=19%, list=1%, signal=19%	ATXN10/SLC3A2/ACTB/BRK1/PPM1F/SAMM50/NDUFS2/OXSM/RNH1/CAPZB/ZHX2/NDUFA10/DBN1/SQSTM1/NLN/RRP1
TAF15	0.925982	1.46012	0.000651141	1333	tags=18%, list=2%, signal=17%	DHX9/HNRNPM/HNRNPA3/SART3/FANCI/TARDBP/HNRNPU/HNRNPH1/SMPD4/SAFB2/NSUN2/CHD4/IPO7/RPA1/MYH9
SCAP	0.862633	1.45978	0.00315336	2413	tags=18%, list=4%, signal=17%	FLNB/SMPD4/LRPPRC/WASF2/GCN1/ACTN4/RPN1/ABI2/INF2/ACTA1/NDUFS2/MYH10/MRPS17/NLN/GYS1
ZFP41	0.887315	1.4597	0.0170637	978	tags=10%, list=2%, signal=9%	BOP1/FANCI/MRPS17/RUFY1/GCN1/TRIP6/SMPD4/WASF2
AC100757.3	0.999764	1.45956	0.0141748	14	tags=1%, list=0%, signal=1%	ACTG1
EIF2AK1	0.879569	1.45777	0.0115565	2697	tags=27%, list=5%, signal=26%	SMPD4/HNRNPU/CD2AP/MYH9/IPO7/SART3/WASF2/SAFB2/CHCHD3/RAC1/BRK1/RPA1/ACTB/GCN1/FLNB/LRPPRC/SAMM50/NSUN2/ACTA2/GYS1/ACTG2/CNOT1/SLC3A2
FAM98A	0.87668	1.45776	0.00311616	2005	tags=31%, list=4%, signal=30%	NLN/IPO7/BOP1/NCKAP1/GCN1/MYH9/CD2AP/PRDX1/STRAP/MYL6/HNRNPM/LRPPRC/ZHX2/CHCHD3/RPN1/ACTB/RNH1/OXSM/PML/PRC1/NDUFC1/PPM1F/SQSTM1/BRK1/ABI2/DSTN
PCBP2	0.924535	1.45703	0.000233328	1850	tags=28%, list=3%, signal=27%	TARDBP/HNRNPA3/AAAS/FANCI/SART3/RAC1/ABI2/HNRNPU/SMPD4/DHX9/HNRNPH1/MYL6/RRP1/CHD4/SAFB2/CHCHD3/SAMM50/CAPZB/GCN1/PRC1/TRIP6/HNRNPM/RUFY1
AC099811.3	0.796754	1.45664	0.00454403	6291	tags=23%, list=11%, signal=20%	SLC2A3/PRC1/NLN/TLN1/GYS1/FANCI/CHCHD3/ACTBL2/ARMC6/OXSM/ACTG1/MYH9/UBASH3B/PCBP2/DHX9/MRPS17/NDUFA10/SAFB2/NDUFS2
TAMM41	0.859572	1.45558	0.00266561	1372	tags=25%, list=2%, signal=24%	SMPD4/HNRNPH1/OXSM/SART3/BRK1/RPA1/DBN1/HNRNPM/PCBP2/ABI2/PML/GYS1/CHCHD3/CHD4/GCN1/TARDBP/ACTN4/DHX9/HNRNPA3/RRP1/MYH10
RCCD1	0.866437	1.45445	0.00174716	2487	tags=23%, list=5%, signal=22%	AAAS/FANCI/SMPD4/PRC1/SART3/NSUN2/NCKAP1/PML/ACTG1/MYL6/HNRNPA3/ACTN4/ANP32E/MRPS17/NDUFA10/BRK1/OXSM/TRIP6/ZHX2
KRT8	0.851982	1.45403	0.0105774	3821	tags=27%, list=7%, signal=26%	RAC1/UBASH3B/SLC3A2/INF2/ZHX2/ACTB/MYL6/TRIP6/ABI2/PPM1F/PML/DSTN/BOP1/SQSTM1/FLNB/MRPS17/BRK1/NDUFC1/RPN1/DHX9/PDLIM1/TLN1/DBN1
SYF2	0.866792	1.4536	0.0038092	2154	tags=17%, list=4%, signal=16%	CAPZB/TARDBP/PCBP2/WASF2/AAAS/BRK1/SART3/DSTN/SLC2A1/RNH1/SLC2A3/PDLIM1/NDUFS1/NUBPL
MGAT4B	0.842613	1.45333	0.00933922	3532	tags=20%, list=6%, signal=19%	SQSTM1/INF2/ACTA1/NLN/SMPD4/TRIP6/MYH9/IPO7/TLN1/AAAS/SAMM50/CD2AP/SART3/MYH10/NDUFA10/DSTN/SLC2A3
AC079414.3	0.841618	1.45233	0.00260186	2447	tags=14%, list=4%, signal=14%	SAFB2/AAAS/PCBP2/SART3/TARDBP/HNRNPU/RPA1/SLC2A1/PML/MYL6/LRPPRC/ACTN4
MIR513C	0.999855	1.45218	0.00886813	9	tags=1%, list=0%, signal=1%	ACTA1
SPAG16	0.862305	1.45207	0.00170074	2660	tags=15%, list=5%, signal=15%	SART3/TARDBP/SMPD4/PCBP2/FANCI/NDUFA10/NUBPL/CAPZB/ACTA1/CHD4/MRPS17/ACTC1/HNRNPM
STK25	0.937827	1.45115	0.000409364	1119	tags=17%, list=2%, signal=16%	HNRNPA3/HNRNPU/SMPD4/HNRNPM/PCBP2/TARDBP/AAAS/SAFB2/NDUFA10/SART3/ACTB/RUFY1/CHD4/FANCI
PDHA1	0.850845	1.44953	0.0110572	2136	tags=20%, list=4%, signal=19%	STRAP/CHCHD3/LRPPRC/NDUFS2/NDUFA11/CNOT1/CYFIP1/ACTN4/NSUN2/NDUFS1/DHX9/EPAS1/HNRNPA3/MYH10/RPA1/ANP32E/HNRNPU
AC017104.4	0.836301	1.44906	0.00770194	1684	tags=14%, list=3%, signal=14%	SMPD4/HNRNPU/DHX9/NLN/HNRNPM/ANP32E/INF2/SART3/LRPPRC/STRAP/GYS1/WASF2
RNF167	0.861604	1.44883	0.0299149	2270	tags=20%, list=4%, signal=19%	RPA1/HNRNPM/RNH1/AAAS/ACTB/BRK1/PPM1F/NDUFA10/SLC3A2/RAC1/ACTA2/MYL6/BOP1/MYH9/PDLIM1/MYH10/HNRNPH1
TMEM116	0.849833	1.44876	0.015409	3230	tags=21%, list=6%, signal=20%	SART3/GCN1/ANP32E/AAAS/RPA1/HNRNPH1/MYH10/OXSM/NLN/GTF2I/ATXN10/GYS1/FLNB/TNKS1BP1/ACTC1/ARMC6/RAC1/IPO7
APEH	0.831525	1.44841	0.0255705	3381	tags=25%, list=6%, signal=24%	BRK1/RNH1/RAC1/NDUFS2/CHCHD3/SQSTM1/MYL6/NUBPL/NLN/PRDX1/NDUFA10/CYFIP1/ACTN4/LRPPRC/FLNB/OXSM/NDUFS1/PDLIM1/ACTG2/MYH9/CAPZB
MRPL30	0.906136	1.4484	0.00307252	1752	tags=17%, list=3%, signal=16%	SMPD4/LRPPRC/HNRNPU/HNRNPM/NDUFA10/SART3/GCN1/ABI2/DHX9/HNRNPA3/PPM1F/NDUFS1/IPO7/BRK1
AC007952.5	0.999709	1.44819	0.0213095	17	tags=1%, list=0%, signal=1%	PML
ATPSCKMT	0.818909	1.44786	0.0152003	2083	tags=21%, list=4%, signal=21%	DSTN/NSUN2/TARDBP/ABI2/PRDX1/DHX9/HNRNPM/OXSM/HNRNPA3/SART3/ACTN4/RAC1/SAMM50/NDUFC1/NCKAP1/PPM1F/ATXN10/IPO7
PGAM5	0.878318	1.44736	0.00760022	732	tags=13%, list=1%, signal=13%	GCN1/SART3/HNRNPU/OXSM/ACTN4/SAFB2/WASF2/NLN/RRP1/MRPS17/ZHX2
SLC25A30-AS1	0.804393	1.44701	0.00472413	5897	tags=29%, list=11%, signal=26%	TRIP6/ACTA1/FLNA/ARMC6/TARDBP/EPAS1/SAFB2/CD2AP/IPO7/RAC1/NDUFS2/INF2/HNRNPU/RRP1/ACTC1/DHX9/IPO4/UBASH3B/RUFY1/SAMM50/PDLIM1/FLNB/ANP32E/ACTA2
FBXO4	0.868343	1.4464	0.00305378	1150	tags=11%, list=2%, signal=11%	DHX9/HNRNPA3/ANP32E/SMPD4/HNRNPM/PCBP2/RRP1/RPA1/FLNB
GPR89B	0.844978	1.44525	0.00447295	3840	tags=25%, list=7%, signal=23%	CHD4/TARDBP/HNRNPU/PCBP2/HNRNPA3/AAAS/FLNA/DHX9/HNRNPH1/FANCI/HNRNPM/MYH9/ANP32E/ZHX2/LRPPRC/ARMC6/SQSTM1/GYS1/ACTB/CAPZB/ABI2
PDXK	0.850206	1.44473	0.00681204	2123	tags=17%, list=4%, signal=16%	RRP1/PPM1F/WASF2/AAAS/ABI2/RNH1/CHD4/RAC1/RUFY1/CHCHD3/NDUFC1/FLNB/NDUFS1/SAMM50
SQOR	0.877441	1.44463	0.00220002	2998	tags=23%, list=5%, signal=21%	CHD4/TARDBP/RRP1/RAC1/MYL6/UBASH3B/BOP1/MRPS17/TLN1/PDLIM1/GTF2I/MYH9/RUFY1/PPM1F/PML/ACTN4/CAPZB/INF2/SART3
TMEM41A	0.818866	1.44449	0.00555137	4551	tags=25%, list=8%, signal=23%	GYS1/HNRNPU/RRP1/MRPS17/FLNB/MYL6/RPA1/CHCHD3/SART3/ACTB/NLN/NDUFS2/ZHX2/BOP1/ABI2/HNRNPM/RAC1/DHX9/ATXN10/SLC3A2/HNRNPH1
MIR4482	0.800518	1.44425	0.0103421	4121	tags=17%, list=7%, signal=15%	NDUFS1/CNOT1/RRP1/NLN/SLC7A11/PCBP2/GYS1/CHCHD3/PDLIM1/CYFIP1/ACTN4/DBN1/NDUFA11/WASF2
NUDT4	0.840817	1.44391	0.00458422	2444	tags=21%, list=4%, signal=21%	LRPPRC/ABI2/RPA1/CD2AP/SART3/HNRNPM/MRPS17/HNRNPA3/MYH10/TARDBP/AAAS/HNRNPU/EPAS1/TNKS1BP1/CHD4/RAC1/ACTG2/NCKAP1
AC011749.1	0.999927	1.44382	1e-10	5	tags=1%, list=0%, signal=1%	PRDX1
TRAPPC4	0.890727	1.44361	0.00237514	3288	tags=29%, list=6%, signal=27%	RAC1/UBASH3B/TARDBP/CD2AP/DBN1/DSTN/WASF2/ACTG1/GYS1/ZHX2/ATXN10/ABI2/NSUN2/SLC2A1/LRPPRC/RNH1/SPART/NDUFA10/SQSTM1/NDUFA11/BOP1/ACTC1/RPN1/ACTG2
ANO10	0.854305	1.44307	0.00261293	1172	tags=10%, list=2%, signal=9%	PRDX1/WASF2/CAPZB/PML/BRK1/ACTB/DBN1/PPM1F
TFAP4	0.899496	1.44295	0.000855075	1561	tags=24%, list=3%, signal=23%	SART3/SMPD4/HNRNPM/DHX9/TARDBP/HNRNPU/ZHX2/AAAS/CD2AP/RUFY1/HNRNPA3/GCN1/SQSTM1/ACTG1/HNRNPH1/BOP1/INF2/PCBP2/NUBPL/PPM1F
RNU5B-2P	0.816417	1.44269	0.0122555	2104	tags=11%, list=4%, signal=10%	CHD4/NLN/NDUFA11/SQSTM1/AAAS/BOP1/SLC7A11/STRAP/GTF2I
AC073136.1	0.883949	1.44245	0.00134337	2615	tags=18%, list=5%, signal=17%	LRPPRC/SART3/NCKAP1/GTF2I/CNOT1/IPO7/HNRNPA3/CYFIP1/STRAP/ANP32E/RNH1/NDUFS1/SLC7A11/BOP1/GYS1
CIR1	0.896442	1.44215	0.00168982	2645	tags=21%, list=5%, signal=20%	HNRNPU/NCKAP1/TARDBP/RPA1/DHX9/SMPD4/CD2AP/LRPPRC/RNH1/ABI2/AAAS/SAMM50/ANP32E/ACTA2/NDUFA10/ARMC6/IQGAP1/NDUFS2
AC026318.1	0.999891	1.44198	1e-10	7	tags=1%, list=0%, signal=1%	ACTG2
MYL12B	0.831196	1.4411	0.0109089	1250	tags=17%, list=2%, signal=16%	PDLIM1/BRK1/MYL6/TRIP6/CAPZB/NDUFS1/LRPPRC/ACTB/HNRNPM/PML/CHD4/RNH1/DSTN/ACTG2
ZC3HAV1	0.906458	1.4409	0.000735269	1011	tags=20%, list=2%, signal=20%	GCN1/WASF2/CNOT1/IPO7/NCKAP1/HNRNPM/GTF2I/HNRNPU/SART3/FLNB/PRDX1/RNH1/TLN1/CYFIP1/NLN/RPA1/SLC2A1
PMPCB	0.903701	1.44069	0.00316154	2170	tags=21%, list=4%, signal=21%	GTF2I/IPO7/LRPPRC/NDUFS1/HNRNPM/CNOT1/RPA1/NDUFS2/ZHX2/CHCHD3/STRAP/RNH1/PML/DHX9/ARMC6/ACTA2/RAC1/DBN1
GEMIN8P4	0.813382	1.4406	0.018627	3331	tags=26%, list=6%, signal=25%	RNH1/TARDBP/OXSM/HNRNPM/HNRNPA3/SART3/RRP1/AAAS/PPM1F/SLC3A2/PRDX1/IPO4/ACTN4/IQGAP1/ACTA1/GCN1/RPN1/WASF2/SMPD4/SQSTM1/ATXN10/NDUFC1
PACC1	0.893088	1.44053	0.00111519	1631	tags=21%, list=3%, signal=21%	HNRNPU/SART3/HNRNPA3/DHX9/ACTG1/ACTB/GYS1/SMPD4/CAPZB/SLC3A2/SAFB2/WASF2/RUFY1/FANCI/RNH1/ATXN10/STRAP/TLN1
FOXP1	0.823858	1.44027	0.00760022	2552	tags=15%, list=5%, signal=15%	CHD4/HNRNPU/GYS1/HNRNPM/RAC1/DSTN/PDLIM1/SLC2A3/TARDBP/NDUFA11/PCBP2/SAFB2/STRAP
RRS1	0.892361	1.43975	0.00916899	642	tags=5%, list=1%, signal=5%	BOP1/ZHX2/SLC3A2/IPO4
SOX6	0.816381	1.43968	0.00894937	3723	tags=26%, list=7%, signal=24%	IQGAP1/RUFY1/NCKAP1/DBN1/RRP1/HNRNPH1/UBASH3B/BRK1/ATXN10/RAC1/EPAS1/MRPS17/NDUFA11/GYS1/PRDX1/WASF2/NLN/SMPD4/PRC1/PDLIM1/GCN1/ACTG2
HBEGF	0.86573	1.43927	0.0103844	2885	tags=17%, list=5%, signal=16%	SLC2A3/IQGAP1/PML/UBASH3B/SPART/FLNA/ACTC1/PRC1/SLC7A11/STRAP/RUFY1/SMPD4/MYL6/PRDX1
TULP3	0.918239	1.43913	0.000373852	1878	tags=26%, list=3%, signal=25%	SART3/HNRNPU/RPA1/SMPD4/FANCI/DHX9/HNRNPA3/HNRNPH1/HNRNPM/FLNB/NDUFA10/STRAP/RPN1/ANP32E/ZHX2/CHD4/PCBP2/GCN1/PDLIM1/ACTN4/CD2AP/MYH9
HDLBP	0.865592	1.43902	0.0102636	2433	tags=26%, list=4%, signal=25%	NDUFA10/SMPD4/CYFIP1/GCN1/ATXN10/DHX9/ACTN4/HNRNPU/SART3/ZHX2/HNRNPM/MYH9/RNH1/RPN1/WASF2/CNOT1/NCKAP1/TLN1/PCBP2/NUBPL/GYS1/INF2
GTF2IP1	0.926109	1.43844	0.00012216	1848	tags=26%, list=3%, signal=25%	GTF2I/ACTN4/IPO7/DHX9/LRPPRC/FLNB/RAC1/ACTB/MYH9/CNOT1/ATXN10/NCKAP1/NDUFS1/SLC3A2/HNRNPU/NDUFS2/TNKS1BP1/RPA1/SLC2A1/STRAP/DSTN/MYH10
CYCS	0.857663	1.43799	0.00400557	1705	tags=14%, list=3%, signal=14%	CHCHD3/GYS1/RAC1/STRAP/ACTB/MYH9/FANCI/NDUFA11/NSUN2/NDUFS2/PDLIM1/SAMM50
ADCK1	0.816809	1.43799	0.0187009	3089	tags=24%, list=6%, signal=23%	ACTB/RPN1/RNH1/INF2/SAFB2/BOP1/ACTC1/NUBPL/ANP32E/HNRNPH1/SLC3A2/SPART/GTF2I/ATXN10/NCKAP1/DHX9/SQSTM1/HNRNPA3/SLC2A1/NSUN2
HNRNPKP2	0.867561	1.43757	0.00738987	1802	tags=14%, list=3%, signal=14%	RPA1/HNRNPU/DHX9/SLC2A1/HNRNPA3/SMPD4/IPO7/SART3/NUBPL/EPAS1/AAAS/OXSM
POU5F1B	0.84706	1.4375	0.0108439	3114	tags=14%, list=6%, signal=13%	UBASH3B/ACTG1/RUFY1/BOP1/NLN/FLNB/NCKAP1/PDLIM1/ACTG2/SLC2A3/NDUFA10/SLC2A1
INTS11	0.887953	1.43743	0.0107625	1140	tags=19%, list=2%, signal=19%	CAPZB/SAFB2/RUFY1/TARDBP/AAAS/DHX9/WASF2/ATXN10/RNH1/RRP1/FANCI/SART3/PCBP2/PRDX1/HNRNPU/ABI2
UBTFL6	0.879513	1.4372	0.00520364	4142	tags=20%, list=8%, signal=19%	SMPD4/TLN1/CYFIP1/ACTA1/NDUFA10/FLNA/EPAS1/CHD4/ACTG2/NCKAP1/ACTA2/CAPZB/NUBPL/NLN/SQSTM1/TARDBP/ACTG1
AC138894.4	0.999855	1.43691	1e-10	9	tags=1%, list=0%, signal=1%	MYL6
AP005136.3	0.843397	1.43664	0.0119726	1350	tags=12%, list=2%, signal=12%	HNRNPA3/HNRNPU/TARDBP/SART3/FANCI/ABI2/GYS1/ACTC1/ATXN10/NCKAP1
FH	0.835214	1.43616	0.00725663	490	tags=6%, list=1%, signal=6%	NDUFS2/SPART/ATXN10/HNRNPA3/AAAS
CKB	0.801639	1.43606	0.0113978	6457	tags=26%, list=12%, signal=23%	DBN1/ACTB/TRIP6/HNRNPA3/CD2AP/NLN/FLNB/HNRNPU/CYFIP1/PCBP2/ANP32E/ZHX2/ACTG2/INF2/NDUFS2/ACTG1/SLC3A2/PRC1/UBASH3B/SLC7A11/SAMM50/RRP1
TRNAU1AP	0.884965	1.43561	0.00504135	903	tags=14%, list=2%, signal=14%	TARDBP/WASF2/BRK1/CAPZB/PRDX1/RPA1/HNRNPM/RAC1/RRP1/MYL6/LRPPRC/ACTB
RTCB	0.895338	1.43546	0.00491891	1985	tags=23%, list=4%, signal=22%	ATXN10/HNRNPM/NDUFA10/CYFIP1/TNKS1BP1/NDUFS1/CHCHD3/STRAP/RNH1/NDUFS2/LRPPRC/RPN1/IPO7/ACTB/BRK1/AAAS/FLNA/DHX9/PDLIM1
MANF	0.839148	1.43515	0.0290337	2510	tags=18%, list=5%, signal=17%	RPN1/BOP1/BRK1/ACTB/MYL6/FANCI/ACTN4/HNRNPM/INF2/RAC1/CHCHD3/RUFY1/ACTG1/NUBPL/ABI2
MRPS6	0.806528	1.43503	0.0059492	3104	tags=17%, list=6%, signal=16%	PPM1F/RRP1/MYL6/HNRNPM/BRK1/DBN1/ABI2/TNKS1BP1/NDUFS1/RAC1/PRC1/NDUFA10/RPN1/CYFIP1
CAMTA1	0.836847	1.43493	0.0272163	2802	tags=17%, list=5%, signal=16%	CAPZB/TARDBP/PRDX1/NUBPL/SLC2A1/RAC1/NDUFC1/RPN1/RUFY1/STRAP/TLN1/CHD4/PCBP2/OXSM
PIAS4	0.927904	1.43478	0.000921952	1565	tags=20%, list=3%, signal=20%	HNRNPM/SAFB2/AAAS/HNRNPU/RPA1/DHX9/ANP32E/GCN1/GYS1/PCBP2/BRK1/CAPZB/RRP1/ABI2/RPN1/TNKS1BP1/NUBPL
PSMB2	0.894914	1.43466	0.00770762	1524	tags=12%, list=3%, signal=12%	PRDX1/WASF2/CAPZB/TARDBP/FANCI/HNRNPU/SQSTM1/BOP1/SLC7A11/ARMC6
SPIN2B	0.873957	1.43374	0.00104732	2935	tags=23%, list=5%, signal=21%	RPA1/AAAS/SMPD4/DHX9/CNOT1/NDUFS2/PPM1F/SAFB2/HNRNPM/GCN1/RPN1/ANP32E/GTF2I/GYS1/SLC2A1/ACTC1/MRPS17/NSUN2/IPO7
SAFB	0.947439	1.43374	0.0001916	536	tags=18%, list=1%, signal=18%	SAFB2/AAAS/DHX9/RPA1/HNRNPM/HNRNPA3/SMPD4/HNRNPH1/GYS1/HNRNPU/SART3/ACTN4/RNH1/FANCI/TARDBP
ERP29	0.828743	1.43356	0.0110855	3757	tags=26%, list=7%, signal=24%	BRK1/TARDBP/CHD4/PCBP2/MYL6/FANCI/NDUFA10/CAPZB/NDUFS2/TRIP6/ARMC6/WASF2/SQSTM1/SLC2A1/TNKS1BP1/PRDX1/ACTB/ACTG2/GYS1/EPAS1/SPART/RRP1
AC069234.5	0.843398	1.43297	0.0169731	1368	tags=13%, list=2%, signal=13%	HNRNPU/STRAP/GCN1/SQSTM1/AAAS/LRPPRC/BOP1/PCBP2/SMPD4/CD2AP/SLC2A3
PITPNA	0.87459	1.43275	0.00798804	1261	tags=18%, list=2%, signal=17%	RPA1/GTF2I/NDUFS1/FLNA/MYH10/CHCHD3/GYS1/PML/RNH1/CYFIP1/DSTN/PRDX1/PRC1/SPART/IQGAP1
AC087564.1	0.856411	1.4327	0.00649994	3444	tags=19%, list=6%, signal=18%	DBN1/CNOT1/ACTG1/ACTA1/RPN1/GTF2I/NDUFA11/ATXN10/CD2AP/GCN1/MRPS17/DHX9/SART3/IQGAP1/DSTN/EPAS1
CMAHP	0.814998	1.43247	0.0122782	4453	tags=25%, list=8%, signal=23%	TLN1/NDUFA10/PPM1F/MYH10/NSUN2/IPO7/ARMC6/IPO4/SAMM50/IQGAP1/SLC2A3/SPART/CAPZB/ATXN10/ACTA2/PML/NLN/DSTN/PDLIM1/PRDX1/TNKS1BP1
PIR	0.869187	1.43229	0.00682778	3098	tags=20%, list=6%, signal=19%	PRDX1/NLN/SQSTM1/SLC7A11/RNH1/BRK1/OXSM/SLC3A2/GCN1/CHCHD3/PPM1F/CAPZB/HNRNPA3/BOP1/ACTG1/STRAP/IPO7
PANX2	0.823186	1.43227	0.0156348	1361	tags=10%, list=2%, signal=9%	PRDX1/SLC7A11/SQSTM1/NLN/HNRNPH1/DBN1/NSUN2/NDUFA11
UMPS	0.890914	1.43212	0.0057745	3220	tags=30%, list=6%, signal=28%	HNRNPU/SART3/DHX9/SMPD4/GCN1/WASF2/BRK1/RPA1/LRPPRC/NDUFS2/HNRNPA3/ACTC1/HNRNPM/CHCHD3/OXSM/RUFY1/GYS1/RRP1/RNH1/MYL6/SQSTM1/MYH9/PRC1/ACTG2/DSTN
LTA4H	0.876144	1.43201	0.00496532	1635	tags=23%, list=3%, signal=22%	GCN1/HNRNPU/FANCI/HNRNPM/SMPD4/ABI2/LRPPRC/HNRNPH1/PRC1/DHX9/CAPZB/IPO7/SART3/AAAS/WASF2/RPA1/HNRNPA3/PCBP2/RRP1
DAP3	0.896367	1.43199	0.00940446	935	tags=14%, list=2%, signal=14%	NDUFS2/ATXN10/NSUN2/HNRNPU/RNH1/BOP1/PRDX1/RRP1/PPM1F/OXSM/SQSTM1/ACTN4
FAM236A	0.999927	1.43164	1e-10	5	tags=1%, list=0%, signal=1%	NDUFS1
TBP	0.927111	1.43156	0.0019456	785	tags=14%, list=1%, signal=14%	SART3/SMPD4/HNRNPA3/HNRNPH1/HNRNPU/DHX9/FANCI/HNRNPM/TARDBP/WASF2/NSUN2/TLN1
DDX58	0.838239	1.43143	0.0101842	2412	tags=14%, list=4%, signal=14%	TLN1/PML/DHX9/DSTN/WASF2/RPA1/UBASH3B/NUBPL/HNRNPM/PCBP2/STRAP/TNKS1BP1
USP11	0.873156	1.43084	0.00704241	1823	tags=23%, list=3%, signal=22%	DHX9/FANCI/SART3/HNRNPM/HNRNPA3/MYH10/TLN1/ACTN4/SMPD4/MYH9/WASF2/HNRNPH1/GCN1/DBN1/FLNB/RNH1/ACTA1/CYFIP1/NDUFA11
CNP	0.890566	1.43059	0.0024239	2265	tags=23%, list=4%, signal=22%	RPA1/ATXN10/HNRNPA3/DHX9/SMPD4/HNRNPM/LRPPRC/FANCI/SART3/MYH10/HNRNPU/AAAS/SAFB2/SAMM50/INF2/TARDBP/MRPS17/SLC2A3/CAPZB
CAMK1	0.881939	1.43052	0.000943453	1400	tags=24%, list=3%, signal=23%	GCN1/FLNB/RPA1/SMPD4/CHCHD3/SART3/LRPPRC/HNRNPM/GTF2I/SLC2A3/CNOT1/MYL6/BRK1/ZHX2/MYH10/IPO7/AAAS/RPN1/PCBP2/ACTN4
ERVK3-1	0.8704	1.43039	0.00542766	1608	tags=10%, list=3%, signal=9%	TARDBP/GYS1/SAFB2/SART3/ABI2/AAAS/UBASH3B/CHD4
MRPS35	0.849302	1.43038	0.010082	2244	tags=25%, list=4%, signal=24%	STRAP/LRPPRC/HNRNPU/ACTN4/GCN1/IPO7/SMPD4/RAC1/FLNB/ARMC6/INF2/DHX9/HNRNPH1/ATXN10/SAMM50/MRPS17/DSTN/NUBPL/NCKAP1/CAPZB/SART3
PCM1	0.891236	1.43013	0.0074956	2196	tags=18%, list=4%, signal=17%	IPO7/IQGAP1/LRPPRC/STRAP/FLNB/DHX9/TLN1/GTF2I/NSUN2/CNOT1/ACTG1/EPAS1/RAC1/NDUFC1/ACTG2
EIF3I	0.861544	1.43009	0.00889799	866	tags=11%, list=2%, signal=11%	CAPZB/PRDX1/BRK1/RNH1/HNRNPM/TARDBP/HNRNPU/NDUFC1/IPO7
TOM1	0.82696	1.4299	0.0207439	3448	tags=26%, list=6%, signal=25%	SAMM50/MYH9/RRP1/ATXN10/PPM1F/INF2/AAAS/RNH1/SMPD4/PDLIM1/TRIP6/SPART/SQSTM1/FANCI/ANP32E/SLC3A2/ACTA2/ACTA1/ARMC6/UBASH3B/GCN1/NDUFA10
GATC	0.868365	1.42987	0.00427652	1883	tags=18%, list=3%, signal=17%	SART3/GCN1/TARDBP/SMPD4/PCBP2/HNRNPA3/LRPPRC/RPA1/BRK1/HNRNPM/NDUFC1/CYFIP1/ABI2/HNRNPU/CHD4
COPS3	0.86255	1.42978	0.0139024	1653	tags=17%, list=3%, signal=16%	TARDBP/HNRNPM/HNRNPU/RPA1/ACTB/FANCI/HNRNPA3/PCBP2/OXSM/NDUFS2/RRP1/SLC7A11/LRPPRC/BRK1
MPZ	0.849983	1.42976	0.0355469	1904	tags=12%, list=3%, signal=12%	NLN/SQSTM1/PRDX1/PML/CHD4/TNKS1BP1/RNH1/SART3/NDUFS1/CAPZB
DDX43	0.864199	1.42961	0.0271928	3197	tags=15%, list=6%, signal=15%	UBASH3B/TARDBP/HNRNPH1/MYH10/HNRNPA3/INF2/NDUFS1/ACTC1/ACTA2/CHCHD3/PPM1F/ANP32E/FLNA
CCDC59	0.914696	1.42883	0.00129071	898	tags=13%, list=2%, signal=13%	PCBP2/HNRNPA3/SART3/HNRNPM/AAAS/DHX9/HNRNPU/RPA1/CHD4/NSUN2/ABI2
POLD4	0.787343	1.42883	0.0119892	4369	tags=23%, list=8%, signal=21%	SAFB2/NDUFS2/ACTN4/MYH9/SQSTM1/INF2/MYH10/RAC1/DHX9/CNOT1/HNRNPM/NDUFA10/RPA1/GTF2I/SAMM50/RUFY1/SLC3A2/SMPD4/BRK1
AC008507.1	0.858354	1.42864	0.00564658	2911	tags=17%, list=5%, signal=16%	HNRNPH1/HNRNPA3/SAFB2/PCBP2/CYFIP1/NCKAP1/SQSTM1/NDUFA11/HNRNPU/BRK1/CD2AP/DBN1/AAAS/SART3
HIP1R	0.862543	1.42833	0.00226616	3168	tags=31%, list=6%, signal=29%	SART3/AAAS/IQGAP1/GCN1/PML/CD2AP/DHX9/SMPD4/FLNB/NDUFS2/ACTN4/MYH9/TNKS1BP1/RPA1/RUFY1/ZHX2/NDUFA10/SAFB2/SLC7A11/DBN1/OXSM/ACTG1/NDUFA11/HNRNPH1/SQSTM1/EPAS1
STOML1	0.819874	1.42829	0.019479	2749	tags=17%, list=5%, signal=16%	PML/INF2/RRP1/RAC1/RNH1/PPM1F/IPO4/NDUFS2/SAMM50/NLN/PCBP2/ACTA1/CYFIP1/ACTG2
GPATCH1	0.91295	1.42785	0.00187678	2666	tags=25%, list=5%, signal=24%	DHX9/SMPD4/ACTN4/HNRNPH1/SAFB2/FANCI/AAAS/RPA1/HNRNPU/HNRNPA3/HNRNPM/ABI2/NDUFA10/CNOT1/GYS1/ANP32E/RUFY1/SART3/ZHX2/FLNA/ACTA1
LEO1	0.884663	1.42779	0.00380556	1791	tags=23%, list=3%, signal=22%	NCKAP1/IPO7/ACTN4/SART3/CHCHD3/SMPD4/ATXN10/FANCI/CYFIP1/ABI2/RPA1/DHX9/CD2AP/MYH9/LRPPRC/ACTA2/PML/TARDBP/TNKS1BP1
AC090950.2	0.871647	1.42747	0.00927299	1900	tags=7%, list=3%, signal=7%	RAC1/RRP1/NCKAP1/ACTG2/ACTA1/SAMM50
TKT	0.901769	1.42723	0.00884599	1014	tags=11%, list=2%, signal=11%	BOP1/SQSTM1/SLC7A11/NLN/PPM1F/RNH1/SLC3A2/PRDX1/ZHX2
YBEY	0.798134	1.42706	0.00924699	4546	tags=27%, list=8%, signal=25%	RRP1/NDUFS1/GTF2I/GCN1/CHD4/ARMC6/PPM1F/SAFB2/ACTA2/AAAS/ACTC1/MYL6/TARDBP/TLN1/SQSTM1/STRAP/SLC2A3/ACTA1/RPA1/SLC2A1/RNH1/CD2AP/ACTBL2
PSMA4	0.892081	1.42696	0.00249653	2127	tags=26%, list=4%, signal=25%	TARDBP/RPN1/PRC1/BRK1/FANCI/CHD4/NSUN2/RUFY1/PCBP2/MYL6/MYH9/PML/GCN1/PRDX1/RRP1/TRIP6/SART3/HNRNPA3/HNRNPU/BOP1/CYFIP1/SLC7A11
AC087500.2	0.779695	1.42666	0.0212936	5143	tags=19%, list=9%, signal=17%	HNRNPH1/NDUFA11/SART3/NDUFS1/LRPPRC/SQSTM1/TARDBP/NCKAP1/DHX9/SLC3A2/BRK1/GCN1/MYL6/ANP32E/FLNA/ZHX2
TES	0.853962	1.42664	0.00307154	2505	tags=25%, list=5%, signal=24%	ACTB/UBASH3B/DSTN/NCKAP1/IQGAP1/IPO7/NLN/GCN1/SART3/PPM1F/RAC1/ZHX2/SLC2A1/HNRNPU/INF2/WASF2/SLC3A2/CAPZB/PML/SMPD4/TLN1
GNG5	0.860616	1.42659	0.0046193	3193	tags=23%, list=6%, signal=21%	SAFB2/AAAS/SMPD4/HNRNPH1/CAPZB/TLN1/FANCI/TARDBP/PRDX1/HNRNPM/HNRNPU/TNKS1BP1/RPN1/ACTA2/RUFY1/NDUFC1/GTF2I/RAC1/IPO7
HEXB	0.837058	1.42657	0.015069	4067	tags=27%, list=7%, signal=25%	SQSTM1/NLN/RPN1/NSUN2/DHX9/CYFIP1/PRDX1/RUFY1/RNH1/CHCHD3/NCKAP1/CAPZB/SLC7A11/TRIP6/DBN1/CHD4/WASF2/PCBP2/GCN1/HNRNPA3/HNRNPM/ACTA2/BRK1
AC138392.1	0.903085	1.4265	0.00446822	1567	tags=14%, list=3%, signal=14%	CYFIP1/NCKAP1/CNOT1/GTF2I/TLN1/NDUFC1/OXSM/CAPZB/NDUFA11/DSTN/ACTB/SMPD4
AL590282.2	0.824872	1.4265	0.0200004	3633	tags=12%, list=7%, signal=11%	HNRNPH1/DHX9/MYH10/INF2/CD2AP/PDLIM1/BRK1/OXSM/NLN/ATXN10
RPSAP7	0.824223	1.4265	0.0108539	2737	tags=21%, list=5%, signal=20%	HNRNPU/ATXN10/ACTN4/PCBP2/WASF2/PRDX1/BRK1/DHX9/NUBPL/CNOT1/HNRNPH1/ARMC6/MYH10/MYL6/CD2AP/GCN1/MYH9/SQSTM1
DAP	0.823811	1.42639	0.0109813	2195	tags=26%, list=4%, signal=25%	NSUN2/ACTN4/DHX9/FANCI/CNOT1/CAPZB/TARDBP/LRPPRC/SLC7A11/AAAS/STRAP/HNRNPU/GTF2I/SAMM50/RPN1/IPO4/PRC1/IPO7/NDUFA10/HNRNPH1/ACTG2/SLC3A2
IFT122	0.871181	1.42633	0.00361688	1787	tags=21%, list=3%, signal=21%	ABI2/RPA1/SART3/DHX9/AAAS/ACTN4/MYH10/TNKS1BP1/HNRNPU/SMPD4/IPO4/CYFIP1/FANCI/HNRNPA3/LRPPRC/SLC3A2/TLN1/RPN1
RASAL2-AS1	0.861007	1.42592	0.00499606	3116	tags=26%, list=6%, signal=25%	SART3/SMPD4/RPA1/IPO7/SLC7A11/NUBPL/ACTN4/TARDBP/HNRNPU/ZHX2/PRC1/PDLIM1/ACTA1/AAAS/TNKS1BP1/ABI2/NDUFC1/ACTA2/ATXN10/PPM1F/STRAP/MYH9
AL021707.3	0.85719	1.42582	0.0172467	548	tags=6%, list=1%, signal=6%	IPO7/LRPPRC/HNRNPH1/GTF2I/CHCHD3
UFD1	0.856719	1.42577	0.0220158	1446	tags=17%, list=3%, signal=16%	ATXN10/SAMM50/ACTB/HNRNPA3/HNRNPM/RPN1/TARDBP/AAAS/DBN1/IPO7/MYL6/ACTA1/SAFB2/CAPZB
CTDP1	0.903392	1.42546	0.000349094	2468	tags=27%, list=4%, signal=26%	SART3/HNRNPM/ACTN4/SMPD4/AAAS/DHX9/SAFB2/RUFY1/HNRNPU/NCKAP1/PML/CAPZB/ABI2/INF2/RPN1/SQSTM1/CD2AP/NDUFC1/PCBP2/PDLIM1/TNKS1BP1/ATXN10/ACTG1
CCM2	0.793104	1.42518	0.0338295	2356	tags=18%, list=4%, signal=17%	TRIP6/RNH1/SAMM50/RPN1/RRP1/FLNB/MYH9/ARMC6/BRK1/NDUFA10/CAPZB/PRC1/CHCHD3/DSTN/MYL6
DNAAF5	0.903917	1.42504	0.00265135	2201	tags=23%, list=4%, signal=22%	SMPD4/IPO7/DHX9/SART3/ACTN4/HNRNPU/SQSTM1/RPA1/RNH1/LRPPRC/GYS1/ACTA2/CNOT1/ARMC6/NLN/ABI2/RUFY1/WASF2/MYH9
GCLM	0.888715	1.42457	0.0025318	1171	tags=12%, list=2%, signal=12%	NLN/SQSTM1/PRDX1/CYFIP1/SLC7A11/CNOT1/NCKAP1/NSUN2/NDUFS2/HNRNPH1
CYB5R3	0.85377	1.42451	0.00439956	2022	tags=15%, list=4%, signal=15%	ATXN10/INF2/ACTN4/RAC1/TRIP6/PPM1F/SAMM50/NDUFS1/NDUFS2/DSTN/HNRNPU/BRK1/NDUFC1
GSDMD	0.869671	1.42451	0.0385064	2033	tags=21%, list=4%, signal=21%	BOP1/RRP1/BRK1/TARDBP/RNH1/NDUFC1/CHD4/ZHX2/CHCHD3/SAFB2/MYL6/SLC3A2/PDLIM1/ABI2/RUFY1/FANCI/ATXN10/HNRNPH1
KIF1C	0.845424	1.42422	0.0385682	1719	tags=17%, list=3%, signal=16%	RPA1/PPM1F/GCN1/MYH10/TNKS1BP1/PML/NDUFS1/NDUFS2/LRPPRC/WASF2/MYL6/RAC1/NCKAP1/RNH1
RN7SL627P	0.999437	1.4242	0.02305	32	tags=1%, list=0%, signal=1%	PCBP2
LLPH	0.882914	1.4241	0.00416383	1367	tags=19%, list=2%, signal=19%	TARDBP/MYL6/HNRNPM/SART3/DBN1/AAAS/GYS1/RAC1/PCBP2/SLC2A3/GCN1/SQSTM1/BRK1/ACTB/PRC1/CHD4
RBMS3-AS1	0.999836	1.42405	0.0218513	10	tags=1%, list=0%, signal=1%	NSUN2
AL442128.2	0.889907	1.42402	0.00693417	2308	tags=10%, list=4%, signal=9%	HNRNPA3/HNRNPM/HNRNPH1/ABI2/TNKS1BP1/DSTN/SQSTM1/SAFB2
AC004069.1	0.826531	1.42361	0.00483792	3785	tags=23%, list=7%, signal=21%	AAAS/ZHX2/HNRNPM/CAPZB/TARDBP/RAC1/NDUFA10/DSTN/MYL6/ABI2/INF2/PDLIM1/CHD4/IPO7/GTF2I/SAFB2/GYS1/NUBPL/PCBP2
TMEM144	0.846483	1.42358	0.00677917	2790	tags=20%, list=5%, signal=19%	SLC2A1/SLC7A11/NCKAP1/SQSTM1/CAPZB/SLC3A2/NDUFS1/ACTG2/ANP32E/WASF2/TNKS1BP1/EPAS1/CHCHD3/SLC2A3/NUBPL/RPA1/ZHX2
PRPSAP2	0.822224	1.42344	0.0100324	3004	tags=24%, list=5%, signal=23%	HNRNPU/DHX9/SART3/HNRNPA3/ANP32E/MYL6/RRP1/RUFY1/SLC7A11/SAFB2/CNOT1/BRK1/HNRNPM/ACTA1/DSTN/MYH10/NLN/ARMC6/NDUFS2/PCBP2
PTDSS1	0.876793	1.42329	0.0120156	1227	tags=10%, list=2%, signal=9%	BOP1/ZHX2/SLC3A2/WASF2/RNH1/RAC1/ACTG1/FLNB
TOP1MT	0.884321	1.42328	0.0290705	834	tags=10%, list=2%, signal=9%	BOP1/ZHX2/RRP1/SLC3A2/INF2/PDLIM1/ATXN10/DHX9
HSP90B1	0.829607	1.42254	0.0188635	2114	tags=18%, list=4%, signal=17%	RPN1/HNRNPM/HNRNPA3/SART3/MYL6/HNRNPU/GYS1/INF2/BRK1/NUBPL/MYH10/TARDBP/FLNA/HNRNPH1/SPART
ZNF740	0.909533	1.42231	0.00180793	1802	tags=17%, list=3%, signal=16%	RPA1/AAAS/SART3/SMPD4/GCN1/DHX9/PPM1F/HNRNPH1/PCBP2/HNRNPU/ZHX2/ABI2/ACTN4/TLN1
UCKL1	0.906818	1.42225	0.00209828	2017	tags=21%, list=4%, signal=21%	HNRNPA3/HNRNPM/FANCI/PCBP2/HNRNPH1/GYS1/AAAS/HNRNPU/RPA1/SMPD4/RUFY1/DHX9/SAFB2/TARDBP/ACTN4/SLC3A2/INF2/IPO7
OGFOD2	0.905258	1.42211	0.00208834	2176	tags=17%, list=4%, signal=16%	DHX9/SART3/GCN1/SMPD4/RPA1/HNRNPU/NSUN2/LRPPRC/MYH10/CNOT1/GTF2I/ABI2/PPM1F/AAAS
CTDSPL	0.849708	1.42184	0.00621751	2396	tags=20%, list=4%, signal=19%	SMPD4/DBN1/UBASH3B/BRK1/HNRNPA3/RAC1/HNRNPM/FLNB/WASF2/GCN1/RRP1/PPM1F/RPA1/ABI2/CD2AP/ACTN4/DSTN
DEF8	0.862961	1.42173	0.00795257	2120	tags=15%, list=4%, signal=15%	GYS1/HNRNPH1/PPM1F/MYH9/CAPZB/SART3/CD2AP/MRPS17/DBN1/RUFY1/ACTB/WASF2/HNRNPU
AC087499.3	0.9998	1.4217	0.00535407	12	tags=1%, list=0%, signal=1%	ACTBL2
NAE1	0.887015	1.42165	0.00824717	1782	tags=24%, list=3%, signal=23%	HNRNPU/RPA1/ABI2/TARDBP/CAPZB/LRPPRC/HNRNPM/SART3/WASF2/DHX9/ACTB/PDLIM1/SAMM50/AAAS/ACTN4/OXSM/ATXN10/HNRNPH1/PCBP2/BOP1
AL590666.2	0.798067	1.42149	0.0208653	2768	tags=12%, list=5%, signal=11%	SQSTM1/NLN/PRDX1/ACTN4/ANP32E/RRP1/IQGAP1/CYFIP1/FLNB/SLC2A3
PLCD1	0.823036	1.42141	0.0129888	2494	tags=21%, list=5%, signal=20%	BRK1/HNRNPA3/SART3/SMPD4/OXSM/RPA1/ANP32E/FLNB/GCN1/CNOT1/WASF2/TNKS1BP1/NUBPL/HNRNPM/ZHX2/MYH9/RAC1/DHX9
DHX29	0.895552	1.42068	0.00429607	2403	tags=21%, list=4%, signal=21%	GTF2I/CNOT1/ACTN4/IPO7/NDUFS1/NSUN2/CYFIP1/CHCHD3/DHX9/NLN/CAPZB/ATXN10/SMPD4/SPART/MRPS17/MYH9/TRIP6/RNH1
TCF25	0.840876	1.42066	0.0323353	3549	tags=27%, list=6%, signal=26%	CNOT1/CYFIP1/MYH9/RNH1/SPART/HNRNPM/CD2AP/SLC3A2/CAPZB/RAC1/MYL6/NDUFC1/TLN1/ATXN10/TARDBP/SLC2A1/PPM1F/AAAS/SQSTM1/GCN1/SAMM50/GYS1/CHD4
GSTA11P	0.945475	1.42063	0.00697458	639	tags=5%, list=1%, signal=5%	EPAS1/CHD4/NDUFS1/MYL6
AL121790.1	0.843814	1.42055	0.0178332	2566	tags=13%, list=5%, signal=13%	MRPS17/ACTA2/RPN1/BOP1/HNRNPA3/ARMC6/IPO7/ACTA1/SPART/SAMM50/ACTB
IL1RN	0.794769	1.42038	0.00985275	2840	tags=21%, list=5%, signal=20%	SLC7A11/EPAS1/SLC3A2/ARMC6/PCBP2/SQSTM1/SLC2A3/CNOT1/TNKS1BP1/SLC2A1/ACTG1/GTF2I/ACTG2/CHCHD3/MYH9/IQGAP1/SAMM50/WASF2
STK16	0.846741	1.42028	0.0119504	4658	tags=24%, list=8%, signal=22%	NDUFA10/NUBPL/BRK1/NDUFS1/STRAP/INF2/TLN1/SLC2A1/ATXN10/TNKS1BP1/SAFB2/SAMM50/IPO4/SLC7A11/PRC1/CHCHD3/SMPD4/UBASH3B/LRPPRC/HNRNPM
NRADDP	0.870181	1.42001	0.0076986	1729	tags=7%, list=3%, signal=7%	GYS1/HNRNPH1/SART3/ZHX2/DSTN/MRPS17
PIDD1	0.916421	1.42001	0.000285739	1180	tags=13%, list=2%, signal=13%	AAAS/SAFB2/SART3/SMPD4/HNRNPM/HNRNPH1/FANCI/ACTN4/PRC1/HNRNPU/RNH1
AC026356.1	0.905381	1.41997	0.00163076	2067	tags=18%, list=4%, signal=17%	HNRNPA3/ABI2/TARDBP/SART3/IQGAP1/STRAP/ACTB/SMPD4/SLC2A1/HNRNPM/PPM1F/CHD4/DBN1/MRPS17/SAFB2
SOX2-OT	0.891388	1.41971	0.0211196	1808	tags=11%, list=3%, signal=10%	SMPD4/RRP1/ARMC6/RPA1/INF2/PRDX1/UBASH3B/NUBPL/DHX9
HSPA9	0.860587	1.41969	0.0130451	1207	tags=12%, list=2%, signal=12%	SQSTM1/NSUN2/NDUFS1/NLN/LRPPRC/CHCHD3/CYFIP1/ARMC6/ACTA2/OXSM
UBE2D2	0.90471	1.41959	0.00661932	3567	tags=31%, list=6%, signal=29%	HNRNPU/RUFY1/PCBP2/AAAS/HNRNPM/IQGAP1/CHCHD3/SART3/TARDBP/NSUN2/BRK1/DHX9/SAMM50/SLC3A2/NDUFA10/FANCI/PML/HNRNPA3/OXSM/ACTG2/IPO7/SPART/PRDX1/CYFIP1/FLNB/NDUFS2
RRBP1	0.824829	1.41929	0.0102048	2754	tags=20%, list=5%, signal=19%	CD2AP/MYH9/INF2/ATXN10/ANP32E/ACTN4/DSTN/ACTB/SMPD4/RPN1/SAFB2/AAAS/MYH10/SLC2A3/ACTG2/FANCI/ARMC6
SLC1A4	0.838508	1.41928	0.00473115	3030	tags=24%, list=5%, signal=23%	NCKAP1/SART3/HNRNPU/HNRNPA3/SLC3A2/RPA1/LRPPRC/HNRNPM/BOP1/SLC2A1/SLC2A3/MYH10/DHX9/ATXN10/ZHX2/SQSTM1/BRK1/PRC1/PDLIM1/CHD4
DFFA	0.892611	1.41926	0.00882572	1585	tags=19%, list=3%, signal=19%	CAPZB/WASF2/PRDX1/GCN1/SART3/RNH1/GYS1/TARDBP/TNKS1BP1/FANCI/RPN1/MYH10/HNRNPU/OXSM/ACTA2/ACTC1
BTF3L4	0.9124	1.41896	0.00146967	1605	tags=25%, list=3%, signal=24%	TARDBP/SLC2A1/HNRNPU/SART3/IPO7/DHX9/FANCI/HNRNPH1/SMPD4/PRC1/ABI2/BRK1/AAAS/RAC1/ACTG1/PRDX1/GYS1/DBN1/CHD4/NUBPL/PCBP2
C20orf96	0.894364	1.41888	0.000528732	1870	tags=23%, list=3%, signal=22%	AAAS/SMPD4/ABI2/PCBP2/HNRNPA3/FANCI/PRC1/DBN1/OXSM/IPO4/BRK1/RRP1/RUFY1/IQGAP1/MYL6/HNRNPH1/FLNB/GTF2I/CAPZB
HNRNPA0	0.945213	1.4188	0.000126225	244	tags=14%, list=0%, signal=14%	SART3/HNRNPM/HNRNPU/HNRNPA3/DHX9/SMPD4/AAAS/HNRNPH1/SAFB2/RPA1/ABI2/TARDBP
PHF23	0.88361	1.41875	0.0178746	1833	tags=21%, list=3%, signal=21%	RPA1/DHX9/HNRNPA3/MYL6/ATXN10/OXSM/RPN1/PML/NUBPL/CHD4/HNRNPM/PRC1/SLC7A11/GYS1/BRK1/PDLIM1/BOP1/TNKS1BP1
AC138696.2	0.837777	1.41865	0.0245572	4491	tags=27%, list=8%, signal=25%	BOP1/IPO4/EPAS1/NDUFA11/IQGAP1/CHD4/GTF2I/UBASH3B/GCN1/SPART/PRDX1/CYFIP1/TARDBP/NDUFC1/NDUFS2/SQSTM1/SLC2A3/MRPS17/NSUN2/IPO7/CNOT1/NLN/NDUFA10
GLRX2	0.830236	1.41859	0.0185793	916	tags=11%, list=2%, signal=11%	DHX9/NDUFS2/ANP32E/STRAP/DSTN/HNRNPU/RPA1/RUFY1/RPN1
AC009226.1	0.831424	1.41846	0.0230146	2916	tags=15%, list=5%, signal=15%	SMPD4/NCKAP1/NLN/RAC1/ATXN10/LRPPRC/SLC2A1/MYL6/ACTA2/DHX9/NSUN2/PDLIM1/NDUFS1
MIEF1	0.916856	1.41841	0.00330891	1206	tags=19%, list=2%, signal=19%	ATXN10/MYH9/GTF2I/SAMM50/SMPD4/DHX9/EPAS1/GCN1/PPM1F/LRPPRC/CYFIP1/HNRNPM/FLNB/NDUFS2/TARDBP/SART3
RPP40P1	0.980915	1.41802	0.0195221	1051	tags=1%, list=2%, signal=1%	TNKS1BP1
AL139005.1	0.850963	1.41799	0.019314	1852	tags=12%, list=3%, signal=12%	SLC2A3/PML/IQGAP1/CYFIP1/GCN1/TRIP6/IPO4/DSTN/NDUFA10/CAPZB
FAM215B	0.804866	1.41798	0.0104056	4340	tags=17%, list=8%, signal=15%	ABI2/SQSTM1/IPO4/NSUN2/CD2AP/NDUFA11/NDUFS1/SLC7A11/TARDBP/ATXN10/SAFB2/RNH1/ACTC1/TNKS1BP1
GNAI2	0.872046	1.41795	0.0031689	2579	tags=30%, list=5%, signal=28%	CAPZB/PCBP2/SART3/PML/FLNA/PRDX1/WASF2/SMPD4/IQGAP1/BRK1/RPA1/ANP32E/MYH10/CYFIP1/OXSM/ACTB/UBASH3B/SLC2A3/GTF2I/HNRNPA3/NUBPL/EPAS1/TLN1/ABI2/NCKAP1
AC009506.1	0.828923	1.41792	0.0064954	4409	tags=24%, list=8%, signal=22%	AAAS/TARDBP/ABI2/GYS1/CHD4/NDUFA10/HNRNPA3/CD2AP/FANCI/ZHX2/DBN1/ACTA2/TLN1/SPART/FLNB/SAFB2/IPO4/SAMM50/ACTBL2/NDUFS1
ATF6	0.891607	1.41779	0.00291831	1561	tags=11%, list=3%, signal=10%	NDUFS2/MYH9/NSUN2/DHX9/ACTN4/NDUFS1/IPO7/LRPPRC/ACTA2
PLEKHM2	0.918932	1.41772	0.00112208	1462	tags=19%, list=3%, signal=19%	CAPZB/SART3/WASF2/GCN1/PRDX1/CNOT1/TNKS1BP1/SMPD4/ACTN4/AAAS/RAC1/PPM1F/HNRNPM/FLNA/RNH1/ACTA2
RN7SKP113	0.999891	1.41766	1e-10	7	tags=1%, list=0%, signal=1%	RPN1
WDR4	0.876204	1.41732	0.00968256	2728	tags=19%, list=5%, signal=18%	RRP1/HNRNPM/BOP1/BRK1/PPM1F/PML/STRAP/ARMC6/NLN/FANCI/GCN1/ACTA2/SPART/WASF2/SLC7A11/HNRNPA3
THAP2	0.860631	1.41725	0.00564597	2966	tags=18%, list=5%, signal=17%	ABI2/SART3/RUFY1/DHX9/NCKAP1/TARDBP/HNRNPU/ACTN4/LRPPRC/HNRNPM/MYH10/NLN/TRIP6/TLN1/DBN1
RP9	0.883704	1.41709	0.00745243	1726	tags=12%, list=3%, signal=12%	RAC1/PCBP2/TARDBP/PRC1/IPO4/ACTB/NDUFA11/PPM1F/ACTA1/INF2
AP001330.4	0.810339	1.4167	0.00801833	2346	tags=11%, list=4%, signal=10%	TARDBP/IQGAP1/RAC1/CHCHD3/CHD4/MYL6/FLNA/NDUFC1/SLC3A2
VIRMA	0.923003	1.41664	0.00771645	2949	tags=31%, list=5%, signal=29%	NCKAP1/BOP1/ZHX2/SART3/HNRNPU/LRPPRC/IPO7/DHX9/RUFY1/HNRNPH1/RPA1/HNRNPM/SMPD4/GCN1/PPM1F/ACTG1/STRAP/RAC1/INF2/WASF2/NDUFS1/DBN1/TRIP6/ABI2/HNRNPA3/NLN
PDHB	0.849845	1.41656	0.011058	2424	tags=17%, list=4%, signal=16%	RPA1/LRPPRC/NDUFS1/ATXN10/MYH10/HNRNPH1/CHCHD3/OXSM/MYH9/ACTB/ABI2/NDUFA10/FANCI/PCBP2
SPATC1L	0.836323	1.41655	0.0110988	2662	tags=15%, list=5%, signal=15%	DBN1/RRP1/FANCI/RUFY1/PDLIM1/ACTG2/BRK1/NSUN2/ARMC6/GYS1/SLC2A1/RPA1/NDUFS2
FADS6	0.758767	1.41654	0.014706	3287	tags=24%, list=6%, signal=22%	NDUFS2/PML/GYS1/CYFIP1/NDUFA11/SQSTM1/CHCHD3/SLC2A1/NUBPL/BOP1/UBASH3B/LRPPRC/NDUFC1/RAC1/MYH10/SLC7A11/ACTA2/CAPZB/GTF2I/NDUFA10
GNB1	0.92786	1.41641	0.00164412	1916	tags=25%, list=3%, signal=24%	WASF2/CAPZB/CNOT1/MYH9/NCKAP1/CYFIP1/BRK1/GYS1/TARDBP/GTF2I/ACTB/ACTN4/RAC1/FLNA/NSUN2/AAAS/NDUFA10/SART3/HNRNPM/GCN1/CD2AP
TSEN34	0.880942	1.41627	0.0131514	2864	tags=25%, list=5%, signal=24%	TARDBP/SMPD4/RRP1/BRK1/PCBP2/HNRNPM/HNRNPU/GCN1/RPN1/HNRNPA3/ABI2/DBN1/ARMC6/CAPZB/RPA1/TNKS1BP1/WASF2/ACTB/ZHX2/TLN1/PRC1
TREML3P	0.928482	1.41593	0.00824076	1302	tags=11%, list=2%, signal=10%	SQSTM1/NLN/PRDX1/FANCI/BOP1/SLC7A11/RAC1/ZHX2/GCN1
PRELID2	0.865075	1.41587	0.00435301	3294	tags=19%, list=6%, signal=18%	ABI2/HNRNPH1/TARDBP/PRC1/HNRNPA3/SMPD4/ACTA1/NDUFC1/BRK1/NLN/MYL6/BOP1/UBASH3B/ACTA2/FLNB/CHCHD3
AC025280.1	0.933875	1.41586	0.0138656	3006	tags=14%, list=5%, signal=14%	ABI2/CNOT1/CD2AP/CHCHD3/GCN1/HNRNPH1/TARDBP/ARMC6/NUBPL/FANCI/ACTG2/HNRNPU
SLC9A8	0.837612	1.41585	0.0133673	3232	tags=19%, list=6%, signal=18%	CYFIP1/MYH9/GYS1/WASF2/GCN1/CAPZB/SMPD4/NSUN2/RAC1/ACTN4/SQSTM1/DHX9/PRDX1/NDUFC1/ACTG1/HNRNPH1
RRP12	0.870909	1.4158	0.00838283	2837	tags=18%, list=5%, signal=17%	BOP1/RRP1/ZHX2/SLC3A2/PPM1F/HNRNPU/MYH9/ACTB/UBASH3B/DHX9/TRIP6/SMPD4/PDLIM1/NUBPL/HNRNPM
DLD	0.861211	1.41572	0.0172908	3241	tags=15%, list=6%, signal=15%	CHCHD3/NDUFS1/IPO7/CNOT1/NDUFA10/NLN/EPAS1/NDUFS2/TNKS1BP1/GTF2I/SLC3A2/NDUFA11/NUBPL
AL023803.3	0.793566	1.41565	0.0123443	4832	tags=26%, list=9%, signal=24%	CHD4/NDUFA11/PRC1/SLC2A3/NDUFC1/FLNA/TRIP6/NLN/WASF2/GTF2I/SPART/GYS1/CYFIP1/LRPPRC/MYH9/PML/TLN1/RRP1/HNRNPA3/MYH10/DSTN/SAMM50
EIF2B1	0.918397	1.4155	0.000944677	1613	tags=26%, list=3%, signal=25%	SART3/FANCI/HNRNPU/HNRNPM/DHX9/HNRNPA3/AAAS/RPA1/TARDBP/WASF2/SMPD4/GCN1/LRPPRC/CHCHD3/ACTG1/NLN/SQSTM1/FLNB/IQGAP1/PCBP2/NSUN2/NDUFA10
MTERF3	0.891883	1.41537	0.0138031	1011	tags=8%, list=2%, signal=8%	BOP1/ZHX2/DHX9/SQSTM1/PRDX1/ACTB/RUFY1
FUS	0.89892	1.41535	0.00310033	1621	tags=21%, list=3%, signal=21%	DHX9/HNRNPM/SMPD4/SART3/HNRNPH1/RUFY1/HNRNPU/HNRNPA3/RPA1/SAFB2/ANP32E/PPM1F/AAAS/ABI2/TNKS1BP1/CHCHD3/ACTN4/GYS1
TXN2	0.853518	1.41504	0.0109846	2876	tags=19%, list=5%, signal=18%	ATXN10/SAMM50/PPM1F/NDUFA10/BRK1/TRIP6/MYH9/FLNB/NDUFA11/NDUFC1/ACTA2/MRPS17/RUFY1/ACTA1/GCN1/SAFB2
AC087294.1	0.854127	1.41499	0.0108309	2421	tags=18%, list=4%, signal=17%	PCBP2/AAAS/SMPD4/PRC1/HNRNPA3/HNRNPH1/ABI2/ACTG2/NDUFA10/RPA1/STRAP/SART3/ACTA1/TNKS1BP1/IPO4
DLAT	0.873914	1.41484	0.00592591	1803	tags=20%, list=3%, signal=20%	CNOT1/GTF2I/IPO7/LRPPRC/ACTN4/TLN1/MYH9/BOP1/NDUFS1/NCKAP1/NSUN2/SQSTM1/RAC1/NDUFS2/ACTG1/PRDX1/SPART
ADSL	0.901013	1.41483	0.002534	2111	tags=18%, list=4%, signal=17%	DHX9/SMPD4/GCN1/MYH9/HNRNPU/ATXN10/HNRNPA3/NSUN2/BOP1/IPO4/RRP1/FLNB/ACTB/ACTA2/LRPPRC
GARS1	0.875314	1.41481	0.00713238	2330	tags=20%, list=4%, signal=19%	RAC1/ACTB/DHX9/SLC3A2/CHCHD3/CD2AP/SART3/RNH1/IPO4/RRP1/BRK1/RUFY1/OXSM/ATXN10/BOP1/HNRNPM/MYL6
GTPBP1	0.908132	1.41407	0.00312635	2421	tags=25%, list=4%, signal=24%	RUFY1/AAAS/GCN1/LRPPRC/FLNB/ATXN10/WASF2/CD2AP/MYH9/SMPD4/SART3/PPM1F/ACTN4/ABI2/FLNA/RNH1/IQGAP1/ACTB/TLN1/PDLIM1/INF2
PRPF3	0.904602	1.41407	0.00413116	970	tags=14%, list=2%, signal=14%	TARDBP/HNRNPA3/HNRNPU/FANCI/ANP32E/SART3/DHX9/HNRNPM/CD2AP/PCBP2/PRC1/SMPD4
NME7	0.892669	1.41404	0.0032896	1035	tags=23%, list=2%, signal=22%	DHX9/HNRNPM/FANCI/HNRNPU/SART3/NCKAP1/HNRNPA3/ANP32E/ABI2/CNOT1/RNH1/OXSM/RAC1/TLN1/SLC2A1/NDUFS2/ACTN4/PCBP2/TARDBP
RNF8	0.912534	1.41395	0.00086424	1831	tags=25%, list=3%, signal=24%	HNRNPA3/HNRNPU/SART3/HNRNPM/DHX9/TARDBP/MYH10/LRPPRC/RPA1/PCBP2/AAAS/ANP32E/RAC1/CAPZB/RRP1/BRK1/ARMC6/ACTG2/IPO7/IQGAP1/ACTN4
MOCS3	0.887513	1.41392	0.00355218	2933	tags=24%, list=5%, signal=23%	AAAS/SMPD4/DHX9/NDUFA10/HNRNPM/LRPPRC/NDUFC1/CNOT1/SART3/RNH1/UBASH3B/HNRNPH1/CD2AP/ZHX2/GCN1/RPA1/BOP1/ACTB/ACTG1/NDUFS1
CD99	0.785024	1.41392	0.0202908	2565	tags=12%, list=5%, signal=11%	AAAS/HNRNPM/DHX9/NDUFA10/BRK1/PCBP2/MYL6/SAMM50/PRC1/SLC2A1
C1QL3	0.817419	1.41391	0.0192036	2069	tags=13%, list=4%, signal=13%	CNOT1/IQGAP1/NDUFA11/SQSTM1/TLN1/NDUFS1/GTF2I/NLN/EPAS1/RUFY1/RAC1
AL358075.2	0.793764	1.41381	0.0156013	5452	tags=29%, list=10%, signal=26%	NCKAP1/HNRNPM/MRPS17/ACTA1/SQSTM1/RRP1/INF2/ACTG1/SMPD4/PRC1/SLC2A1/ACTB/ACTC1/CHD4/NLN/DSTN/TRIP6/SPART/SAFB2/TARDBP/RPA1/NUBPL/CHCHD3/CYFIP1
LYSMD4	0.823062	1.41357	0.00944222	3069	tags=21%, list=6%, signal=20%	HNRNPA3/SMPD4/RRP1/ATXN10/GCN1/FANCI/DHX9/ABI2/CHD4/BOP1/INF2/ZHX2/SQSTM1/ACTBL2/FLNB/MRPS17/STRAP/ACTA1
BOD1	0.851961	1.41357	0.0146936	3796	tags=37%, list=7%, signal=34%	RUFY1/PCBP2/FANCI/ATXN10/SART3/IPO4/TARDBP/SLC3A2/RRP1/MYL6/DBN1/SAMM50/HNRNPU/SLC2A1/SAFB2/GYS1/HNRNPA3/NDUFA10/HNRNPM/PML/BRK1/ARMC6/CNOT1/OXSM/PPM1F/PRDX1/STRAP/HNRNPH1/NDUFS1/DSTN/SQSTM1
DES	0.907561	1.41347	0.00388153	1449	tags=7%, list=3%, signal=7%	ACTC1/ACTA2/ACTG2/FANCI/CHD4/WASF2
FLNB-AS1	0.867025	1.41343	0.0142906	536	tags=6%, list=1%, signal=6%	FLNB/STRAP/ANP32E/NDUFA11/IPO7
ZNF346	0.870088	1.41332	0.00519223	2505	tags=29%, list=5%, signal=27%	RUFY1/HNRNPH1/GCN1/ACTN4/SART3/TARDBP/HNRNPM/WASF2/HNRNPU/ARMC6/BRK1/CAPZB/SMPD4/AAAS/SAFB2/FANCI/NDUFC1/PRDX1/RPN1/SAMM50/DHX9/ATXN10/NDUFA10/CYFIP1
MZT1	0.874687	1.4133	0.00365701	1186	tags=20%, list=2%, signal=20%	TARDBP/HNRNPA3/FANCI/ANP32E/SART3/CD2AP/ACTG1/HNRNPU/HNRNPM/STRAP/RPN1/PRC1/GCN1/ACTB/PCBP2/AAAS/BOP1
NMRAL2P	0.859248	1.41319	0.0348385	278	tags=6%, list=1%, signal=6%	SQSTM1/NLN/PRDX1/BOP1/SLC7A11
AC019127.1	0.908981	1.4131	0.00600327	1657	tags=11%, list=3%, signal=10%	PRC1/ACTA2/PPM1F/ACTG1/FANCI/DHX9/TRIP6/ACTA1/LRPPRC
IRGQ	0.857628	1.41309	0.00521328	2304	tags=24%, list=4%, signal=23%	PPM1F/TRIP6/GCN1/ABI2/TARDBP/DBN1/FANCI/DSTN/GYS1/RRP1/CHD4/ARMC6/SART3/WASF2/PML/SLC2A3/ATXN10/SLC7A11/HNRNPU/SLC3A2
AL355388.2	0.841503	1.41282	0.011486	916	tags=11%, list=2%, signal=11%	GTF2I/GCN1/SMPD4/ZHX2/DSTN/OXSM/PPM1F/CNOT1/LRPPRC
NAB2	0.826298	1.41255	0.00787215	4419	tags=30%, list=8%, signal=27%	HNRNPU/UBASH3B/NCKAP1/SAFB2/MYH10/DHX9/INF2/TRIP6/GTF2I/IQGAP1/RRP1/ACTN4/SQSTM1/HNRNPM/PDLIM1/PPM1F/BRK1/SLC2A3/NSUN2/PRC1/FLNB/TARDBP/EPAS1/CD2AP/DSTN
AC106795.1	0.811255	1.41227	0.0361221	2904	tags=8%, list=5%, signal=8%	CHD4/GTF2I/FANCI/TLN1/NDUFA11/UBASH3B/SLC7A11
RSL24D1P6	0.80216	1.41217	0.0174253	4029	tags=24%, list=7%, signal=22%	HNRNPA3/ABI2/ACTG1/DSTN/CNOT1/TRIP6/SLC2A3/SMPD4/MYH9/ACTBL2/NUBPL/NDUFA11/GTF2I/ARMC6/INF2/CHCHD3/DHX9/RRP1/RPA1/SLC3A2
CD151	0.853511	1.41205	0.0119509	1213	tags=11%, list=2%, signal=10%	ACTB/INF2/RNH1/RAC1/MYH9/PML/MYH10/BRK1/CNOT1
AAAS	0.915357	1.41192	0.00054252	2793	tags=25%, list=5%, signal=24%	PCBP2/HNRNPU/FANCI/SAFB2/SART3/HNRNPA3/HNRNPM/DHX9/GYS1/RPA1/HNRNPH1/ANP32E/NDUFA10/NUBPL/RPN1/TARDBP/CD2AP/SMPD4/NDUFC1/NSUN2/PPM1F
MRPS14	0.872822	1.41185	0.0257686	1767	tags=17%, list=3%, signal=16%	NDUFS2/HNRNPM/HNRNPU/RPA1/NCKAP1/AAAS/RUFY1/PCBP2/SAMM50/GTF2I/TRIP6/ATXN10/MYH10/RNH1
LACTB2	0.830216	1.41174	0.0176381	1028	tags=11%, list=2%, signal=11%	BOP1/ZHX2/NLN/ABI2/SQSTM1/ARMC6/NUBPL/EPAS1/HNRNPA3
MIR1244-4	0.844023	1.41173	0.0173046	2113	tags=15%, list=4%, signal=15%	CHD4/TARDBP/MYL6/IPO4/NDUFA11/BRK1/SAFB2/NDUFS2/NCKAP1/BOP1/PRC1/SQSTM1/HNRNPM
ASCC1	0.846749	1.41173	0.0066351	3065	tags=25%, list=6%, signal=24%	MYH9/CYFIP1/ATXN10/EPAS1/GTF2I/BRK1/FLNA/NDUFA10/TLN1/ABI2/WASF2/HNRNPM/SAFB2/ACTB/NCKAP1/RNH1/STRAP/ACTA2/INF2/OXSM/SLC7A11
KRT8P39	0.854836	1.41168	0.0172088	2424	tags=14%, list=4%, signal=14%	HNRNPM/HNRNPH1/SART3/DHX9/ABI2/ACTN4/FANCI/NCKAP1/NUBPL/ACTBL2/MYL6/FLNB
RNU6-274P	0.999855	1.41168	1e-10	9	tags=1%, list=0%, signal=1%	ANP32E
ZNF599	0.87778	1.41151	0.00339633	2523	tags=18%, list=5%, signal=17%	PCBP2/ABI2/AAAS/SMPD4/HNRNPA3/SAFB2/SART3/RNH1/ARMC6/ACTA1/NLN/RAC1/MYL6/RRP1/NUBPL
RHOA	0.907758	1.41148	0.00278476	2553	tags=36%, list=5%, signal=34%	DHX9/HNRNPM/HNRNPA3/SART3/HNRNPU/AAAS/CD2AP/TLN1/FLNA/RPN1/PML/LRPPRC/BRK1/GCN1/SQSTM1/CYFIP1/RAC1/MYH9/WASF2/PPM1F/NCKAP1/STRAP/FLNB/FANCI/RNH1/DSTN/UBASH3B/ATXN10/CAPZB/TARDBP
TMEM39B	0.88244	1.41141	0.00703775	1676	tags=19%, list=3%, signal=18%	CAPZB/WASF2/TARDBP/BRK1/PCBP2/RPA1/RNH1/HNRNPU/AAAS/SART3/SQSTM1/INF2/LRPPRC/NDUFS1/RAC1/PRDX1
PARP10	0.864631	1.41135	0.0152566	4109	tags=25%, list=7%, signal=23%	RNH1/BOP1/SQSTM1/SLC3A2/PML/SAFB2/NLN/TLN1/RPN1/SPART/ZHX2/INF2/ACTA1/CAPZB/MYH9/ACTN4/PDLIM1/HNRNPM/GTF2I/SAMM50/SLC2A3
TAPBP	0.828699	1.41132	0.0263606	1947	tags=13%, list=4%, signal=13%	PML/CAPZB/RNH1/CD2AP/UBASH3B/MYL6/ACTB/HNRNPM/NDUFS2/RPN1/MYH9
AGO2	0.888142	1.41131	0.0183515	1609	tags=18%, list=3%, signal=17%	DHX9/IPO7/NCKAP1/ZHX2/HNRNPU/GCN1/HNRNPA3/PPM1F/HNRNPM/SMPD4/LRPPRC/IPO4/CD2AP/TRIP6/SAMM50
TMEM50A	0.886718	1.41109	0.00351813	2293	tags=25%, list=4%, signal=24%	CAPZB/WASF2/PRDX1/ACTN4/ANP32E/HNRNPM/SLC2A1/TARDBP/PML/IPO7/PPM1F/TRIP6/RNH1/ARMC6/NLN/ACTBL2/MYL6/DSTN/CHCHD3/MRPS17/IPO4
PPIAP71	0.862661	1.41096	0.0112559	2186	tags=10%, list=4%, signal=9%	WASF2/PRDX1/UBASH3B/DSTN/ABI2/IPO4/HNRNPM/BOP1
MCCC1	0.854641	1.41093	0.00818796	3319	tags=21%, list=6%, signal=20%	CNOT1/NDUFS1/CHCHD3/TLN1/NDUFS2/LRPPRC/NDUFA10/WASF2/BRK1/SAMM50/NDUFC1/CYFIP1/RUFY1/ACTB/CHD4/IPO4/IPO7/PDLIM1
C12orf43	0.866072	1.41087	0.0121136	1641	tags=20%, list=3%, signal=20%	SART3/PRC1/GCN1/HNRNPM/SMPD4/AAAS/HNRNPU/SLC7A11/PCBP2/ACTN4/MYL6/HNRNPA3/RRP1/NDUFA10/BRK1/SLC2A1/MYH9
COPG1	0.904483	1.41083	0.00235377	2577	tags=27%, list=5%, signal=26%	RPN1/DHX9/NCKAP1/TLN1/SMPD4/GCN1/IQGAP1/SART3/TARDBP/FANCI/CAPZB/RUFY1/DSTN/STRAP/NDUFA11/FLNB/CHCHD3/BRK1/SAFB2/RAC1/HNRNPA3/GYS1/PPM1F
AC009779.2	0.832553	1.41058	0.0070701	3414	tags=21%, list=6%, signal=20%	AAAS/TARDBP/HNRNPM/PRDX1/EPAS1/FANCI/TNKS1BP1/PRC1/CHCHD3/NUBPL/ACTB/NSUN2/SART3/SAMM50/NLN/DBN1/GCN1/ANP32E
NIPAL2	0.839396	1.41057	0.0210183	4462	tags=30%, list=8%, signal=27%	ZHX2/BOP1/SLC3A2/ACTB/ABI2/TARDBP/DBN1/TLN1/ARMC6/PDLIM1/TRIP6/SART3/MYH9/INF2/SLC2A1/NDUFS1/FLNA/ANP32E/ATXN10/CHD4/WASF2/SQSTM1/CYFIP1/NDUFS2/PRDX1
AP001505.1	0.873678	1.41049	0.0136879	1963	tags=13%, list=4%, signal=13%	RRP1/CHD4/NDUFA11/CHCHD3/SQSTM1/EPAS1/TARDBP/RNH1/PPM1F/ACTB/ANP32E
MAP4	0.899904	1.41043	0.00108932	3515	tags=33%, list=6%, signal=31%	NCKAP1/SART3/RPA1/DSTN/CD2AP/FLNB/GTF2I/WASF2/TNKS1BP1/RAC1/TLN1/CYFIP1/SLC3A2/FLNA/ZHX2/PCBP2/ACTB/GYS1/ANP32E/NLN/EPAS1/ACTN4/RRP1/BOP1/SLC7A11/NSUN2/MYH9/HNRNPM
AKR1B10P1	0.835002	1.40996	0.0485645	2834	tags=15%, list=5%, signal=15%	NLN/SQSTM1/PRDX1/PCBP2/RNH1/PPM1F/BOP1/MYH9/ARMC6/MYH10/BRK1/MYL6/ATXN10
RPS2P5	0.835908	1.40964	0.00928118	2892	tags=24%, list=5%, signal=23%	SMPD4/WASF2/DHX9/ATXN10/ACTG1/ACTN4/AAAS/PCBP2/RPA1/NDUFA10/PPM1F/RUFY1/BOP1/CNOT1/HNRNPM/ACTA2/MRPS17/SQSTM1/DBN1/NLN
METTL25	0.869187	1.4096	0.0017734	1501	tags=15%, list=3%, signal=15%	SART3/HNRNPM/HNRNPU/SMPD4/HNRNPA3/AAAS/RPA1/DHX9/FLNB/CD2AP/STRAP/LRPPRC/PCBP2
TTLL1	0.877525	1.40956	0.00287553	2161	tags=26%, list=4%, signal=25%	ATXN10/SAMM50/HNRNPU/SMPD4/DBN1/HNRNPM/AAAS/DSTN/ACTG1/ARMC6/ACTA2/GCN1/PPM1F/RUFY1/LRPPRC/DHX9/FLNB/MYL6/PDLIM1/ACTB/MYH9/BRK1
CCDC61	0.844403	1.40939	0.0208201	3167	tags=24%, list=6%, signal=22%	RRP1/BRK1/GYS1/RAC1/MRPS17/NDUFS1/PPM1F/AAAS/TRIP6/BOP1/ZHX2/IPO4/UBASH3B/ACTB/NUBPL/ACTA2/PRDX1/SLC3A2/MYH10/PDLIM1
AL355864.1	0.837213	1.40925	0.00910484	2865	tags=18%, list=5%, signal=17%	PRDX1/DBN1/WASF2/CD2AP/RUFY1/IPO7/NDUFS2/BOP1/ZHX2/UBASH3B/SLC2A3/TNKS1BP1/HNRNPH1/CNOT1/PDLIM1
MRPS16P1	0.999146	1.40922	0.0437828	48	tags=1%, list=0%, signal=1%	ABI2
SND1	0.877888	1.40917	0.00894112	2848	tags=31%, list=5%, signal=29%	CHCHD3/DHX9/HNRNPM/GCN1/LRPPRC/IPO7/SLC3A2/GTF2I/PRDX1/PPM1F/RPN1/SMPD4/SAFB2/TLN1/CYFIP1/TNKS1BP1/HNRNPU/IQGAP1/ACTB/BOP1/SART3/RUFY1/NDUFC1/SQSTM1/TARDBP/WASF2
PM20D2	0.874852	1.40908	0.00630887	3296	tags=23%, list=6%, signal=21%	ABI2/SMPD4/FANCI/HNRNPH1/HNRNPM/IPO7/LRPPRC/HNRNPA3/RPA1/HNRNPU/ACTG1/BOP1/TNKS1BP1/ZHX2/DHX9/MYH10/SLC3A2/SLC7A11/ACTN4
UBE2E4P	0.846432	1.40906	0.0119227	3289	tags=19%, list=6%, signal=18%	NCKAP1/DHX9/SMPD4/GTF2I/IPO7/HNRNPA3/NDUFS1/RNH1/HNRNPU/CHD4/HNRNPM/ACTN4/ATXN10/CNOT1/SAMM50/ACTG2
AMFR	0.846499	1.40904	0.0267166	3621	tags=23%, list=7%, signal=21%	CNOT1/NDUFA11/MYH9/CHD4/INF2/STRAP/NUBPL/ATXN10/CYFIP1/NDUFS1/DBN1/PPM1F/IQGAP1/ANP32E/DSTN/SLC2A3/SQSTM1/BRK1/MRPS17
FASTKD2	0.895537	1.40894	0.00349428	2518	tags=21%, list=5%, signal=20%	NDUFS1/NCKAP1/NDUFA10/LRPPRC/NUBPL/RPA1/OXSM/STRAP/DHX9/CNOT1/PPM1F/NDUFC1/ATXN10/CYFIP1/HNRNPH1/NLN/GCN1/HNRNPM
MAPK3	0.864116	1.4089	0.0110353	1926	tags=15%, list=3%, signal=15%	PML/WASF2/HNRNPM/ANP32E/SART3/SMPD4/SQSTM1/CAPZB/TLN1/HNRNPA3/RAC1/MYH10/FANCI
PHF14	0.864856	1.40888	0.00567663	2884	tags=31%, list=5%, signal=29%	LRPPRC/HNRNPM/IPO7/RAC1/HNRNPU/DHX9/ACTN4/GCN1/BRK1/ATXN10/RNH1/CHCHD3/NUBPL/CNOT1/SMPD4/ACTB/NDUFC1/SPART/NDUFS1/PRDX1/CD2AP/AAAS/RPN1/SLC2A1/ACTG2/SLC7A11
PTGES3	0.915314	1.40883	0.000647577	2593	tags=26%, list=5%, signal=25%	SART3/GCN1/HNRNPM/HNRNPU/HNRNPA3/TARDBP/DHX9/PCBP2/PRDX1/RPA1/LRPPRC/AAAS/RAC1/BOP1/IPO7/CD2AP/ACTG2/CYFIP1/PPM1F/SQSTM1/ABI2/WASF2
CAPN15	0.883709	1.40845	0.0170858	3214	tags=23%, list=6%, signal=21%	ACTN4/SMPD4/GCN1/RPA1/SART3/GYS1/HNRNPM/ACTA1/PML/PRC1/AAAS/DHX9/NDUFA10/FLNB/GTF2I/HNRNPA3/SPART/TARDBP/UBASH3B
BCDIN3D	0.796629	1.40826	0.0202429	3730	tags=26%, list=7%, signal=24%	TARDBP/PCBP2/ABI2/SMPD4/AAAS/MRPS17/NSUN2/ARMC6/PPM1F/HNRNPU/BRK1/PDLIM1/CHD4/TRIP6/TLN1/HNRNPA3/RPN1/ANP32E/MYL6/WASF2/RRP1/ACTA2
EIF2A	0.879091	1.40807	0.0081698	1664	tags=18%, list=3%, signal=17%	HNRNPU/LRPPRC/IPO7/DHX9/RPA1/SMPD4/GCN1/CYFIP1/HNRNPA3/ACTN4/PRDX1/ATXN10/WASF2/CD2AP/SAFB2
ATXN10	0.880328	1.40802	0.0146558	1734	tags=22%, list=3%, signal=21%	SAMM50/LRPPRC/HNRNPM/MYH9/DHX9/NDUFS2/CD2AP/AAAS/ACTN4/TARDBP/RRP1/ACTG1/RPA1/TRIP6/EPAS1/DBN1/HNRNPU/RPN1
SIGLEC5	0.894289	1.408	0.0111569	1736	tags=7%, list=3%, signal=7%	PML/ABI2/ACTB/ACTBL2/MYL6/SQSTM1
CHCHD2P2	0.8171	1.408	0.0238797	2563	tags=17%, list=5%, signal=16%	ACTN4/CHCHD3/CYFIP1/DHX9/MYH9/RNH1/INF2/TNKS1BP1/HNRNPM/NDUFC1/ACTA1/LRPPRC/NDUFA11/TRIP6
PDIA5	0.790902	1.40792	0.0172624	1281	tags=15%, list=2%, signal=15%	ATXN10/HNRNPM/RPA1/RPN1/DHX9/ACTN4/AAAS/LRPPRC/NDUFS1/MYH9/SLC7A11/RAC1/PPM1F
AC022726.2	0.967487	1.40789	0.0103742	1525	tags=10%, list=3%, signal=9%	RPN1/STRAP/CAPZB/SQSTM1/ACTA1/GTF2I/CHD4/UBASH3B
AC018690.1	0.866253	1.40777	0.00590149	2691	tags=19%, list=5%, signal=18%	HNRNPH1/HNRNPA3/SMPD4/HNRNPU/SLC7A11/TARDBP/HNRNPM/ABI2/SART3/RRP1/BOP1/SPART/OXSM/AAAS/NDUFS2/ACTG1
SF3A2	0.911916	1.40738	0.00331259	2398	tags=24%, list=4%, signal=23%	SAFB2/HNRNPA3/PCBP2/ANP32E/HNRNPU/ACTN4/HNRNPM/SMPD4/CHD4/ARMC6/AAAS/NDUFA11/MYH9/PML/CNOT1/ACTA2/SAMM50/PRC1/GYS1/SPART
AC026726.1	0.935041	1.4069	0.00509945	3346	tags=15%, list=6%, signal=15%	HNRNPM/OXSM/TRIP6/NDUFS1/CNOT1/PDLIM1/CHCHD3/RRP1/NDUFA10/UBASH3B/RNH1/ANP32E/RPA1
DYM	0.90679	1.40687	0.00166668	2012	tags=24%, list=4%, signal=23%	HNRNPU/RPA1/ABI2/LRPPRC/DHX9/HNRNPA3/ATXN10/IPO7/FANCI/SMPD4/HNRNPH1/HNRNPM/ACTG1/WASF2/SLC7A11/NCKAP1/BRK1/CHCHD3/PPM1F/ACTN4
WDR61	0.854364	1.40682	0.0193821	3824	tags=31%, list=7%, signal=29%	CYFIP1/ATXN10/PRC1/NSUN2/SMPD4/BRK1/HNRNPA3/RPA1/NDUFA10/LRPPRC/RPN1/PCBP2/STRAP/HNRNPM/HNRNPU/PRDX1/MYL6/PPM1F/CHCHD3/NDUFC1/GCN1/OXSM/RUFY1/PDLIM1/DBN1/SLC2A3
AC012645.2	0.826338	1.40679	0.0250579	854	tags=6%, list=2%, signal=6%	CYFIP1/NCKAP1/WASF2/NDUFS2/TARDBP
GOLGA3	0.911236	1.40663	0.00210146	1532	tags=14%, list=3%, signal=14%	GCN1/SMPD4/HNRNPU/SART3/HNRNPM/WASF2/AAAS/TARDBP/SAFB2/GYS1/IPO7/PPM1F
JUN	0.817037	1.4066	0.0169761	3505	tags=20%, list=6%, signal=19%	SLC2A3/ACTB/ZHX2/RAC1/NSUN2/MYH9/SQSTM1/SLC3A2/PML/GCN1/IPO4/BOP1/HNRNPA3/HNRNPH1/NDUFC1/ACTG2/DSTN
AL360091.3	0.901481	1.40649	0.0133165	3156	tags=10%, list=6%, signal=9%	GCN1/SQSTM1/SPART/PRDX1/HNRNPU/ARMC6/NLN/NDUFS1
WFDC3	0.887866	1.40633	0.0105546	911	tags=11%, list=2%, signal=11%	CAPZB/BRK1/HNRNPM/DBN1/MYL6/HNRNPU/PPM1F/RAC1/RPN1
DRG1	0.912534	1.40627	0.00643528	2531	tags=32%, list=5%, signal=31%	ATXN10/TARDBP/BRK1/AAAS/RAC1/PPM1F/RRP1/SAMM50/HNRNPM/HNRNPU/CAPZB/GCN1/BOP1/MYL6/RPN1/FLNB/FANCI/RNH1/NDUFA10/SLC2A1/NDUFC1/CD2AP/DHX9/RPA1/NDUFA11/PRC1/CHCHD3
LMF2	0.843577	1.40585	0.0363769	1200	tags=20%, list=2%, signal=20%	ATXN10/SAMM50/MYH9/GCN1/SMPD4/SAFB2/ACTN4/PRC1/DHX9/HNRNPA3/AAAS/HNRNPU/INF2/FLNA/ACTB/NDUFC1/RPN1
CHIC1	0.859989	1.40584	0.00634401	3074	tags=20%, list=6%, signal=19%	HNRNPU/GYS1/STRAP/MYH10/UBASH3B/RUFY1/NUBPL/SLC7A11/SPART/ACTA2/GTF2I/CNOT1/RPA1/SAMM50/FLNA/RAC1/PCBP2
AC104335.1	0.911988	1.40575	0.00213348	1915	tags=14%, list=3%, signal=14%	SAFB2/DHX9/CYFIP1/GCN1/TLN1/PRDX1/ACTBL2/INF2/ZHX2/FANCI/MYH9/NCKAP1
PTENP1	0.849406	1.40563	0.0191419	3086	tags=17%, list=6%, signal=16%	GTF2I/CNOT1/LRPPRC/IPO7/NCKAP1/CHD4/DBN1/FLNB/MYH9/GYS1/SQSTM1/MYH10/NDUFA10/NUBPL
CSK	0.886955	1.40552	0.00172813	1143	tags=18%, list=2%, signal=18%	PML/HNRNPM/AAAS/SAFB2/SART3/ACTB/CAPZB/PPM1F/ACTN4/HNRNPA3/IQGAP1/TARDBP/TLN1/RUFY1/TNKS1BP1
PDCD11	0.901805	1.40543	0.00278288	2188	tags=23%, list=4%, signal=22%	DHX9/IPO7/GCN1/PPM1F/HNRNPU/SMPD4/LRPPRC/SART3/HNRNPM/ZHX2/PDLIM1/NDUFS2/CD2AP/INF2/NSUN2/FLNB/ANP32E/MYH9/AAAS
MTSS2	0.805659	1.40543	0.030679	2143	tags=21%, list=4%, signal=21%	CNOT1/HNRNPU/GTF2I/SMPD4/SAMM50/NCKAP1/ACTN4/ATXN10/GCN1/LRPPRC/GYS1/NSUN2/ACTG2/DHX9/BRK1/SAFB2/NDUFA11/RPA1
AC004596.1	0.868918	1.40497	0.0049409	3271	tags=14%, list=6%, signal=13%	CYFIP1/NCKAP1/CNOT1/GTF2I/DHX9/MYH9/ZHX2/EPAS1/ACTA2/FLNB/NLN/STRAP
VPS29	0.849135	1.40496	0.0182616	2337	tags=17%, list=4%, signal=16%	FANCI/HNRNPA3/AAAS/PCBP2/SART3/TARDBP/HNRNPM/GCN1/ACTB/RUFY1/MYL6/SAMM50/IPO4/LRPPRC
HADHA	0.830748	1.40491	0.0148858	1885	tags=19%, list=3%, signal=18%	GTF2I/NDUFS1/LRPPRC/SART3/NDUFA10/CNOT1/ACTN4/EPAS1/BRK1/ATXN10/SMPD4/AAAS/HNRNPM/PCBP2/SAMM50/SLC2A3
MAP6D1	0.784348	1.40487	0.0225521	3783	tags=17%, list=7%, signal=16%	SART3/ACTN4/FLNB/HNRNPM/ACTB/SLC7A11/NDUFS1/OXSM/HNRNPU/MYL6/CNOT1/SAFB2/RPA1/IQGAP1
AKR1B10	0.850643	1.40471	0.0261714	2173	tags=11%, list=4%, signal=10%	SQSTM1/NLN/UBASH3B/OXSM/SLC7A11/GYS1/IPO4/PML/NDUFA10
CTR9	0.881869	1.40468	0.00835845	1573	tags=14%, list=3%, signal=14%	CNOT1/GTF2I/IPO7/LRPPRC/EPAS1/NUBPL/HNRNPM/DHX9/FLNB/RPN1/ATXN10/CHCHD3
SERPINF1	0.828471	1.40466	0.0167186	3775	tags=24%, list=7%, signal=22%	SLC2A1/UBASH3B/SLC7A11/RPA1/SPART/INF2/ACTB/GTF2I/ACTG2/NDUFS1/RRP1/IQGAP1/PRDX1/TNKS1BP1/MYL6/PDLIM1/CHCHD3/SQSTM1/NDUFS2/TRIP6
AL358779.1	0.9998	1.40454	0.00968787	12	tags=1%, list=0%, signal=1%	RRP1
TRAPPC12	0.850629	1.40448	0.00784237	2233	tags=20%, list=4%, signal=19%	SAFB2/GCN1/AAAS/MYL6/TARDBP/ACTG1/NDUFA11/SAMM50/SMPD4/DHX9/NCKAP1/CNOT1/DSTN/HNRNPU/WASF2/BRK1/HNRNPM
HNRNPD	0.919163	1.40438	0.00241359	1324	tags=20%, list=2%, signal=20%	DHX9/ABI2/TARDBP/HNRNPM/PCBP2/FANCI/SART3/HNRNPH1/GYS1/SAFB2/ANP32E/SMPD4/CD2AP/HNRNPU/AAAS/CHD4/ARMC6
NEDD8	0.906433	1.4043	0.00311062	1524	tags=12%, list=3%, signal=12%	CHD4/NDUFA11/MYL6/PRC1/CYFIP1/CHCHD3/IPO7/MYH10/HNRNPA3/BRK1
GORASP2	0.907602	1.40426	0.00140403	1092	tags=20%, list=2%, signal=20%	NCKAP1/HNRNPU/DHX9/HNRNPA3/CD2AP/ANP32E/SMPD4/SART3/HNRNPM/LRPPRC/RPA1/RPN1/GYS1/EPAS1/AAAS/NDUFA10/DSTN
PET100	0.875815	1.40408	0.00713346	1035	tags=6%, list=2%, signal=6%	NDUFA11/CHD4/CAPZB/IPO4/NDUFS1
AK6	0.828567	1.404	0.0252448	3926	tags=27%, list=7%, signal=25%	NLN/RRP1/BRK1/RUFY1/AAAS/EPAS1/RNH1/TNKS1BP1/ACTN4/BOP1/INF2/SAFB2/TARDBP/NDUFA10/DSTN/SQSTM1/ZHX2/SLC3A2/NDUFS2/ARMC6/STRAP/PCBP2/NUBPL
FBRSL1	0.852458	1.40387	0.0090482	2388	tags=17%, list=4%, signal=16%	SART3/SMPD4/AAAS/ACTN4/GCN1/INF2/SAFB2/ZHX2/HNRNPM/RRP1/ACTA1/NDUFS1/DSTN/PPM1F
XRCC6	0.930482	1.40373	0.00081191	1029	tags=21%, list=2%, signal=21%	ATXN10/HNRNPM/DHX9/AAAS/SAMM50/HNRNPU/TARDBP/PPM1F/RAC1/DBN1/CAPZB/ACTN4/RRP1/SMPD4/RNH1/PCBP2/SLC7A11/SART3
GRPEL2	0.858375	1.40365	0.00609496	2316	tags=24%, list=4%, signal=23%	SART3/FANCI/ABI2/RUFY1/IPO7/SLC7A11/HNRNPH1/GCN1/NSUN2/RAC1/CD2AP/PPM1F/NCKAP1/RPA1/ACTG1/PRDX1/TARDBP/UBASH3B/RPN1/SQSTM1
AC087071.2	0.835831	1.4036	0.0102048	4248	tags=23%, list=8%, signal=21%	NDUFS1/GTF2I/IPO4/CHCHD3/RPN1/CNOT1/CAPZB/NSUN2/STRAP/HNRNPA3/TLN1/LRPPRC/TARDBP/PML/ARMC6/MYH9/ATXN10/RNH1/ACTA2
GPBP1	0.898911	1.40337	0.00124669	1254	tags=20%, list=2%, signal=20%	HNRNPH1/DHX9/PCBP2/AAAS/HNRNPU/SMPD4/NCKAP1/RUFY1/ACTG2/IQGAP1/FLNB/CD2AP/HNRNPA3/ACTN4/DSTN/RPA1/NSUN2
PPP1CC	0.914718	1.40337	0.00765037	2746	tags=31%, list=5%, signal=29%	HNRNPU/SART3/FANCI/DHX9/GCN1/ACTN4/HNRNPA3/TARDBP/RUFY1/PCBP2/SMPD4/ATXN10/GTF2I/BOP1/NDUFA11/UBASH3B/LRPPRC/SAFB2/RPA1/MYL6/DBN1/AAAS/RPN1/ACTB/ACTG1/PPM1F
SNORD89	0.784965	1.40323	0.0279942	764	tags=7%, list=1%, signal=7%	HNRNPH1/NCKAP1/GTF2I/IPO7/SART3/ACTB
ZNF710-AS1	0.795699	1.40321	0.0390117	5337	tags=25%, list=10%, signal=23%	PPM1F/MYH9/CYFIP1/WASF2/ANP32E/ACTG1/PRDX1/ACTA1/BOP1/CHCHD3/SAFB2/UBASH3B/RRP1/SLC3A2/GCN1/MYH10/DHX9/INF2/RNH1/SLC7A11/MRPS17
TVP23C	0.857366	1.40317	0.00982477	1250	tags=11%, list=2%, signal=10%	ACTB/ACTG1/HNRNPA3/TARDBP/ACTA1/ABI2/CAPZB/AAAS/SART3
PARP1	0.908737	1.40316	0.00310014	1386	tags=20%, list=3%, signal=20%	DHX9/HNRNPU/AAAS/SART3/GCN1/RPA1/SMPD4/RUFY1/HNRNPM/MYH10/ACTN4/ANP32E/LRPPRC/CYFIP1/NDUFS2/MRPS17/GTF2I
OTULIN	0.844476	1.40313	0.0170559	2088	tags=19%, list=4%, signal=18%	NSUN2/SART3/FANCI/DHX9/NCKAP1/NDUFS1/PRC1/NUBPL/RUFY1/RPA1/ACTG2/PML/MYH10/ANP32E/ARMC6/DBN1
MRPL16	0.801716	1.40308	0.0267768	2901	tags=24%, list=5%, signal=23%	NDUFA10/ATXN10/CHCHD3/TNKS1BP1/NDUFS2/OXSM/GTF2I/PRC1/LRPPRC/GCN1/NDUFC1/NDUFA11/PCBP2/MRPS17/RNH1/UBASH3B/MYH9/NSUN2/ABI2/SLC2A3
NANP	0.868661	1.40305	0.0043049	2783	tags=24%, list=5%, signal=23%	SMPD4/DHX9/CD2AP/HNRNPM/HNRNPH1/SART3/HNRNPA3/PPM1F/GCN1/SLC3A2/RPA1/LRPPRC/FANCI/NDUFA11/RPN1/SQSTM1/TARDBP/ANP32E/ATXN10/RNH1
UBE2F	0.838634	1.40302	0.0123783	3685	tags=18%, list=7%, signal=17%	CHD4/RAC1/BRK1/TARDBP/NDUFA10/SLC2A3/RNH1/OXSM/NDUFS2/SLC3A2/MYL6/CAPZB/RUFY1/CHCHD3/HNRNPA3
AC016876.2	0.844023	1.40296	0.01361	3253	tags=19%, list=6%, signal=18%	CHD4/SLC7A11/PML/TLN1/SQSTM1/NDUFA11/ACTG1/ACTA1/CNOT1/FLNB/IPO7/MYH9/CYFIP1/ZHX2/MYH10/PRC1
PWP1	0.919761	1.40292	0.00673312	1725	tags=24%, list=3%, signal=23%	GCN1/HNRNPU/SART3/DHX9/LRPPRC/HNRNPM/SMPD4/PRC1/PCBP2/BRK1/NSUN2/HNRNPH1/RNH1/AAAS/RUFY1/PDLIM1/BOP1/SAFB2/PML/IPO7
ANG	0.840872	1.40289	0.00628978	3352	tags=24%, list=6%, signal=22%	NCKAP1/TLN1/DHX9/IPO7/FANCI/GCN1/GYS1/UBASH3B/LRPPRC/SLC2A1/RAC1/OXSM/DBN1/CYFIP1/BRK1/HNRNPM/HNRNPA3/ACTG2/SAMM50/ARMC6
DGKD	0.885287	1.40262	0.0101041	937	tags=14%, list=2%, signal=14%	ABI2/DHX9/SMPD4/HNRNPH1/WASF2/NCKAP1/SART3/HNRNPA3/CD2AP/MYH10/PPM1F/MYH9
CCDC34	0.892904	1.40243	0.00429607	3138	tags=21%, list=6%, signal=20%	TARDBP/SMPD4/RPA1/PCBP2/HNRNPA3/FANCI/AAAS/ANP32E/NDUFS1/DSTN/INF2/GTF2I/NDUFA10/NUBPL/CNOT1/CYFIP1/SPART/NDUFC1
SRI-AS1	0.90494	1.40243	0.0128131	683	tags=5%, list=1%, signal=5%	ANP32E/SPART/CYFIP1/SLC3A2
AL596275.1	0.819742	1.4024	0.0288584	3247	tags=13%, list=6%, signal=12%	CD2AP/BOP1/RRP1/BRK1/AAAS/SAMM50/NDUFS2/TRIP6/DHX9/ACTA2/HNRNPM
APOO	0.831361	1.40201	0.0128584	1026	tags=11%, list=2%, signal=11%	STRAP/CHCHD3/NDUFS2/CHD4/ZHX2/RUFY1/DSTN/GYS1/PRDX1
ALG8	0.848496	1.4019	0.0123361	2646	tags=21%, list=5%, signal=20%	DHX9/LRPPRC/RPN1/AAAS/SAMM50/HNRNPM/HNRNPU/ATXN10/OXSM/NUBPL/GCN1/UBASH3B/MYH9/ACTG2/CYFIP1/RNH1/SLC7A11/PML
TFDP2	0.866172	1.40185	0.00863214	767	tags=20%, list=1%, signal=20%	HNRNPU/GYS1/HNRNPM/DHX9/WASF2/SMPD4/PCBP2/CNOT1/HNRNPH1/ACTN4/CD2AP/SART3/BRK1/CAPZB/TARDBP/NCKAP1/RPA1
BTG3	0.854885	1.40159	0.00976083	3215	tags=21%, list=6%, signal=20%	HNRNPA3/FANCI/IPO7/HNRNPU/HNRNPM/MYH9/HNRNPH1/CAPZB/CHD4/CD2AP/RPA1/INF2/ANP32E/AAAS/MYH10/RRP1/RNH1/MRPS17
ENO1	0.895317	1.40139	0.00679446	2055	tags=19%, list=4%, signal=18%	WASF2/PRDX1/CAPZB/GCN1/RAC1/CHCHD3/TARDBP/NDUFS2/SLC2A1/RRP1/SQSTM1/ACTBL2/RNH1/DBN1/PCBP2/RUFY1
ITGB3BP	0.869037	1.4013	0.0163847	3766	tags=29%, list=7%, signal=27%	FANCI/HNRNPA3/SART3/TARDBP/PCBP2/BRK1/RAC1/PRC1/AAAS/ABI2/SLC7A11/CNOT1/GYS1/CAPZB/RUFY1/NDUFC1/EPAS1/CHD4/PRDX1/ACTBL2/HNRNPU/INF2/NDUFA10/SLC2A3
TRAF3IP2	0.821617	1.40127	0.0107243	2883	tags=24%, list=5%, signal=23%	MYH9/TNKS1BP1/ANP32E/INF2/TLN1/CD2AP/RRP1/ZHX2/PML/NDUFA10/ACTA1/DSTN/BRK1/PDLIM1/NSUN2/UBASH3B/PRDX1/RNH1/ACTC1/NDUFS1
IMPDH1P6	0.855561	1.40122	0.011715	1604	tags=5%, list=3%, signal=5%	HNRNPU/SMPD4/IPO4/ARMC6
WDCP	0.911952	1.40121	0.00222294	1325	tags=17%, list=2%, signal=16%	LRPPRC/HNRNPU/SMPD4/DHX9/SART3/GCN1/RPA1/AAAS/TARDBP/HNRNPA3/IPO7/PPM1F/HNRNPH1/MYH9
PPP1R9B	0.884848	1.401	0.00314529	1139	tags=17%, list=2%, signal=16%	PML/FLNA/IQGAP1/DBN1/IPO7/HNRNPM/UBASH3B/TLN1/CYFIP1/DSTN/WASF2/ZHX2/SAFB2/NLN
LENG9	0.802426	1.401	0.0190947	2236	tags=15%, list=4%, signal=15%	RNH1/TNKS1BP1/BOP1/PCBP2/SPART/SART3/PML/MRPS17/NSUN2/RUFY1/IPO4/INF2/ACTB
CDC42EP1	0.869436	1.40082	0.0057686	3323	tags=25%, list=6%, signal=24%	HNRNPM/DBN1/RRP1/INF2/TRIP6/ATXN10/ACTG1/RAC1/ACTB/ABI2/GCN1/MRPS17/SLC3A2/ARMC6/PML/ACTA2/PPM1F/CHD4/CYFIP1/NCKAP1/FANCI
STUB1	0.894928	1.40078	0.0131514	2337	tags=19%, list=4%, signal=18%	RNH1/CHCHD3/GCN1/MYH9/PRDX1/GTF2I/CAPZB/CNOT1/TNKS1BP1/IPO7/NDUFS1/RRP1/CD2AP/NDUFS2/NDUFA11/FLNB
SQSTM1	0.8774	1.40074	0.00759461	2846	tags=20%, list=5%, signal=19%	PRDX1/NLN/RUFY1/SLC7A11/SLC3A2/CNOT1/BOP1/OXSM/LRPPRC/BRK1/NDUFA11/ZHX2/RNH1/NSUN2/PRC1/RRP1/INF2
ALG1	0.880656	1.40066	0.0162235	2165	tags=20%, list=4%, signal=19%	ACTN4/SQSTM1/RNH1/CHCHD3/CNOT1/FLNA/MYH9/NLN/NSUN2/CYFIP1/SLC3A2/CAPZB/ACTB/TNKS1BP1/RUFY1/TLN1/FLNB
RRP7BP	0.893737	1.40066	0.00399523	2621	tags=26%, list=5%, signal=25%	DBN1/ATXN10/SMPD4/CD2AP/GCN1/ACTG1/HNRNPM/SAMM50/HNRNPA3/PPM1F/ACTN4/AAAS/LRPPRC/RRP1/TRIP6/ZHX2/IPO4/HNRNPU/RAC1/HNRNPH1/ACTB/CHCHD3
BEX5	0.74747	1.40052	0.0219121	2287	tags=13%, list=4%, signal=13%	MYL6/PRDX1/PRC1/MRPS17/AAAS/NDUFA10/NUBPL/ATXN10/STRAP/NDUFS2/INF2
TAF1B	0.926114	1.4004	0.000925909	1429	tags=18%, list=3%, signal=17%	HNRNPA3/DHX9/NCKAP1/HNRNPU/ABI2/IPO7/SMPD4/LRPPRC/CNOT1/SART3/MYH9/HNRNPH1/TNKS1BP1/GTF2I/FANCI
SUPT3H	0.858813	1.40029	0.0119026	2805	tags=19%, list=5%, signal=18%	CD2AP/HNRNPH1/TARDBP/HNRNPU/ABI2/HNRNPA3/PRC1/SART3/RNH1/CHD4/NLN/GYS1/UBASH3B/ACTA1/CHCHD3/SMPD4
CBX5	0.90547	1.40023	0.00341218	1474	tags=17%, list=3%, signal=16%	SART3/DHX9/RPA1/SMPD4/HNRNPM/ABI2/MYH10/HNRNPH1/TNKS1BP1/ACTN4/CYFIP1/CNOT1/NDUFA10/TLN1
NOL9	0.881526	1.40023	0.019944	1878	tags=23%, list=3%, signal=22%	SART3/TARDBP/GCN1/WASF2/CAPZB/SMPD4/FANCI/DHX9/HNRNPH1/BRK1/PML/HNRNPU/HNRNPM/IPO4/NUBPL/CNOT1/GYS1/CHCHD3/RRP1
AL512590.3	0.838526	1.40021	0.0186229	2554	tags=15%, list=5%, signal=15%	MYH10/RNH1/CHCHD3/LRPPRC/FLNB/GTF2I/DSTN/PRDX1/CD2AP/NLN/NDUFC1/FANCI/SAFB2
ANAPC5	0.921335	1.40021	0.00564036	1179	tags=18%, list=2%, signal=18%	GCN1/SART3/HNRNPU/AAAS/HNRNPM/HNRNPA3/FANCI/SMPD4/TARDBP/DHX9/HNRNPH1/PRC1/ABI2/UBASH3B/RPA1
TMED2	0.856756	1.40009	0.00718785	2564	tags=23%, list=5%, signal=22%	SART3/DHX9/CD2AP/GCN1/SMPD4/NCKAP1/ATXN10/CYFIP1/HNRNPU/FANCI/CNOT1/STRAP/WASF2/ACTG1/MYH9/NLN/DSTN/PRC1/OXSM
TMPO-AS1	0.898098	1.39992	0.0214291	2959	tags=15%, list=5%, signal=15%	FANCI/PRC1/SLC7A11/RPN1/GCN1/HNRNPM/UBASH3B/PCBP2/AAAS/TLN1/SART3/MYL6/ANP32E
KCTD15	0.830095	1.39992	0.0253927	2799	tags=17%, list=5%, signal=16%	DBN1/OXSM/SLC2A1/SPART/IQGAP1/SAMM50/ZHX2/ACTA2/NLN/ARMC6/UBASH3B/SLC3A2/ACTC1/NDUFS1
DROSHA	0.933905	1.39983	0.0022427	1836	tags=20%, list=3%, signal=20%	HNRNPU/DHX9/SART3/SMPD4/NSUN2/HNRNPM/IPO7/AAAS/LRPPRC/HNRNPA3/RPA1/ACTN4/TLN1/FANCI/RPN1/TARDBP/RUFY1
RPUSD3	0.86331	1.39977	0.0171406	1895	tags=15%, list=3%, signal=15%	BRK1/RRP1/AAAS/SQSTM1/HNRNPA3/BOP1/RNH1/ZHX2/PCBP2/NUBPL/OXSM/CNOT1/SAFB2
ABHD17A	0.898454	1.3996	0.0072264	1774	tags=14%, list=3%, signal=14%	SAFB2/ABI2/NDUFA11/GYS1/HNRNPM/TLN1/RPA1/RNH1/SMPD4/PPM1F/HNRNPA3/RRP1
LSM5	0.82586	1.39953	0.0342028	5081	tags=26%, list=9%, signal=24%	FANCI/MYL6/TARDBP/RAC1/PRC1/PCBP2/NDUFA10/NLN/AAAS/NDUFS1/CHCHD3/SLC2A3/ARMC6/SAMM50/SQSTM1/MRPS17/PRDX1/RRP1/FLNA/RUFY1/SLC3A2/DBN1
RNU6-1125P	0.989076	1.3995	0.0062268	603	tags=2%, list=1%, signal=2%	WASF2/EPAS1
FAM160A1	0.891605	1.39949	0.00543042	2275	tags=18%, list=4%, signal=17%	FLNA/IQGAP1/HNRNPM/GYS1/SAFB2/PML/ABI2/UBASH3B/DHX9/ACTBL2/RUFY1/TNKS1BP1/BOP1/DSTN/SART3
CENPJ	0.912584	1.39947	0.00512613	1644	tags=17%, list=3%, signal=16%	HNRNPA3/FANCI/HNRNPU/PRC1/NLN/SLC2A1/TARDBP/RNH1/GCN1/PRDX1/RAC1/FLNB/AAAS/PML
ZC3H7B	0.912125	1.39939	0.00364453	1531	tags=20%, list=3%, signal=20%	SMPD4/MYH9/GTF2I/ATXN10/CNOT1/IPO7/NCKAP1/ACTN4/FLNB/GCN1/PPM1F/RUFY1/NSUN2/PCBP2/CYFIP1/ACTA2/AAAS
MARCHF4	0.893699	1.39935	0.00994145	1541	tags=17%, list=3%, signal=16%	IQGAP1/CAPZB/MYH9/TARDBP/ACTG1/DBN1/FLNA/RPA1/NCKAP1/MYL6/NDUFA10/ATXN10/NDUFS2/PML
DDX11	0.892926	1.39895	0.014481	728	tags=12%, list=1%, signal=12%	HNRNPA3/FANCI/HNRNPM/SART3/SMPD4/ABI2/DHX9/PRC1/TARDBP/ACTG1
EIF4A3	0.926147	1.39884	0.00163131	1636	tags=26%, list=3%, signal=25%	DHX9/HNRNPA3/SART3/HNRNPU/HNRNPM/IPO7/PCBP2/AAAS/RNH1/PRC1/NSUN2/RPA1/CHCHD3/FANCI/ZHX2/SMPD4/LRPPRC/BRK1/ACTB/SLC3A2/SAFB2/STRAP
DLL4	0.873065	1.39881	0.0210486	2576	tags=18%, list=5%, signal=17%	SLC2A3/SPART/SMPD4/FLNA/ACTA2/TLN1/EPAS1/UBASH3B/INF2/SLC3A2/SQSTM1/ACTN4/NCKAP1/RRP1/ACTG2
CDK5RAP2	0.858853	1.39878	0.00906981	2657	tags=19%, list=5%, signal=18%	GCN1/DHX9/HNRNPA3/AAAS/SART3/ACTN4/PRDX1/WASF2/SMPD4/CNOT1/CAPZB/RPA1/NDUFS2/BRK1/NLN/CHCHD3
ATP5F1B	0.864704	1.39875	0.0179132	1787	tags=20%, list=3%, signal=20%	CHCHD3/NDUFS1/STRAP/LRPPRC/NDUFS2/GCN1/PCBP2/NDUFA10/OXSM/GYS1/DHX9/HNRNPM/ACTC1/SLC7A11/WASF2/DBN1/NSUN2
RPS15AP36	0.785953	1.39874	0.0282292	841	tags=4%, list=2%, signal=4%	DHX9/ACTN4/CHD4
MEMO1P1	0.918063	1.39869	0.00234323	1228	tags=15%, list=2%, signal=15%	CNOT1/NCKAP1/GTF2I/NDUFS1/ACTN4/TLN1/MYH9/LRPPRC/HNRNPH1/DHX9/WASF2/RAC1/ABI2
MYC	0.860745	1.39865	0.00495947	3463	tags=17%, list=6%, signal=16%	BOP1/ZHX2/NLN/SLC3A2/PRDX1/SAMM50/GYS1/RRP1/IPO4/CYFIP1/FLNA/MYL6/PPM1F/BRK1
SLC38A6	0.827613	1.39862	0.0316037	3328	tags=24%, list=6%, signal=22%	SLC7A11/SQSTM1/BRK1/PCBP2/AAAS/SART3/CAPZB/NLN/PRDX1/HNRNPU/SLC3A2/DBN1/FLNB/NUBPL/ACTB/NCKAP1/SLC2A1/NDUFS1/MRPS17/RAC1
CHKA	0.85637	1.39852	0.00703434	1284	tags=15%, list=2%, signal=15%	PCBP2/ACTN4/HNRNPU/SMPD4/LRPPRC/AAAS/SAFB2/SART3/DHX9/HNRNPM/TNKS1BP1/ACTG2/RPA1
SRRD	0.92364	1.39849	0.00454481	1844	tags=18%, list=3%, signal=17%	ATXN10/MYH9/DHX9/IPO7/SMPD4/HNRNPU/LRPPRC/SAMM50/SLC3A2/FLNA/HNRNPM/CNOT1/GTF2I/NLN/ACTN4
FAM207A	0.847303	1.3984	0.0180067	441	tags=5%, list=1%, signal=5%	RRP1/BRK1/CHD4/AAAS
C1orf146	0.833038	1.39826	0.0182685	1538	tags=8%, list=3%, signal=8%	CHD4/SMPD4/IPO4/MYL6/UBASH3B/GTF2I/ACTB
ZNF354A	0.824421	1.39809	0.00822667	3381	tags=20%, list=6%, signal=19%	HNRNPH1/CD2AP/HNRNPU/RUFY1/GTF2I/SMPD4/NSUN2/ARMC6/SAFB2/CYFIP1/ACTC1/SLC2A1/PPM1F/MYL6/TARDBP/IPO7/ANP32E
HMGN2P5	0.83502	1.39807	0.013253	5110	tags=39%, list=9%, signal=36%	FANCI/CAPZB/SAFB2/HNRNPM/PRDX1/PRC1/TLN1/MYH10/SART3/ACTN4/NDUFA10/LRPPRC/MYL6/AAAS/RPA1/TNKS1BP1/SMPD4/STRAP/SAMM50/TARDBP/NDUFA11/PPM1F/NCKAP1/PCBP2/HNRNPA3/ACTC1/FLNB/NDUFS1/OXSM/DBN1/HNRNPU/NSUN2/INF2
SMN1	0.86105	1.39794	0.010118	1821	tags=12%, list=3%, signal=12%	HNRNPU/HNRNPA3/CD2AP/FANCI/PCBP2/DHX9/DBN1/BOP1/NLN/PRC1
CENPN	0.878035	1.39788	0.003678	3621	tags=31%, list=7%, signal=29%	CNOT1/HNRNPA3/GTF2I/TARDBP/HNRNPM/PRDX1/DHX9/TLN1/HNRNPU/SART3/CHCHD3/SMPD4/STRAP/SQSTM1/RNH1/FANCI/NSUN2/ATXN10/BOP1/NDUFS1/ACTC1/ACTBL2/FLNB/CAPZB/ACTB/NUBPL
TTLL12	0.84492	1.39781	0.0362757	1952	tags=17%, list=4%, signal=16%	ATXN10/GCN1/SAMM50/GTF2I/SLC3A2/CD2AP/TRIP6/LRPPRC/MYH9/RNH1/CHCHD3/NDUFA10/PRDX1/INF2
SDHA	0.815511	1.39778	0.0323506	4358	tags=21%, list=8%, signal=20%	CNOT1/NDUFA11/NSUN2/IPO7/SPART/IPO4/BOP1/EPAS1/NDUFA10/DBN1/SQSTM1/MYL6/TRIP6/SLC2A3/STRAP/PCBP2/DHX9/MYH9
RPL19P1	0.999909	1.39755	1e-10	6	tags=1%, list=0%, signal=1%	TLN1
ZSCAN31	0.801961	1.39754	0.0114271	3491	tags=20%, list=6%, signal=19%	NLN/RUFY1/SQSTM1/SLC7A11/SAFB2/CD2AP/PRDX1/SAMM50/MYH10/RAC1/NUBPL/INF2/ARMC6/OXSM/RRP1/ANP32E/HNRNPH1
SLC12A2	0.8527	1.3975	0.00935053	2533	tags=12%, list=5%, signal=11%	ACTG1/UBASH3B/ABI2/IQGAP1/INF2/SLC3A2/DBN1/NUBPL/CYFIP1/TLN1
UBA1	0.875326	1.39735	0.00286334	3011	tags=30%, list=5%, signal=28%	ACTN4/DHX9/GCN1/HNRNPU/MYH9/INF2/HNRNPM/IQGAP1/TNKS1BP1/TLN1/SMPD4/GYS1/IPO7/NCKAP1/CAPZB/RNH1/ATXN10/ACTG2/CHCHD3/SART3/DSTN/SPART/TARDBP/ACTG1/RRP1
ZNF629	0.849362	1.39725	0.0128211	2371	tags=24%, list=4%, signal=23%	FANCI/ABI2/TARDBP/SART3/RPN1/CHD4/HNRNPU/GYS1/AAAS/MYH10/DBN1/MYL6/SAFB2/SMPD4/GTF2I/ACTN4/HNRNPM/DHX9/TLN1/BOP1
CHCHD3P3	0.874377	1.39724	0.00561538	1152	tags=17%, list=2%, signal=16%	CHCHD3/CNOT1/STRAP/DHX9/IPO7/ACTN4/GCN1/CYFIP1/AAAS/RPN1/BRK1/DSTN/MYH10/OXSM
NCOA4P3	0.884456	1.39722	0.00846101	2462	tags=14%, list=4%, signal=14%	GTF2I/CNOT1/NSUN2/CHD4/NUBPL/TRIP6/HNRNPM/PRDX1/MYH9/TLN1/CD2AP/NCKAP1
UBE2E3	0.877319	1.39711	0.00293495	2732	tags=24%, list=5%, signal=23%	ABI2/SMPD4/HNRNPA3/DHX9/HNRNPU/SART3/CAPZB/AAAS/INF2/HNRNPM/RPA1/BRK1/MYH9/SAMM50/ATXN10/ACTG1/RRP1/ACTG2/NCKAP1/NDUFA10
RAB38	0.877908	1.39697	0.00793171	3315	tags=15%, list=6%, signal=15%	SLC2A1/GYS1/IQGAP1/TARDBP/SPART/ACTA2/ACTBL2/SQSTM1/UBASH3B/CAPZB/NDUFA10/RRP1/MYH9
LMX1A-AS2	0.999473	1.39687	0.00530504	30	tags=1%, list=0%, signal=1%	SMPD4
ACP1	0.88265	1.39685	0.0124532	1334	tags=18%, list=2%, signal=17%	LRPPRC/SMPD4/NCKAP1/HNRNPU/ATXN10/GCN1/SART3/DHX9/PML/ABI2/CD2AP/CYFIP1/STRAP/ZHX2/CHCHD3
AC063949.1	0.976389	1.39682	0.00399062	1301	tags=2%, list=2%, signal=2%	CAPZB/ABI2
NUP35	0.87715	1.39677	0.0142523	2250	tags=23%, list=4%, signal=22%	HNRNPU/HNRNPA3/SMPD4/DHX9/AAAS/LRPPRC/NCKAP1/ABI2/HNRNPH1/CD2AP/RPA1/GTF2I/ZHX2/PRC1/RPN1/NLN/MYH10/MYH9/TARDBP
PITPNB	0.840394	1.39663	0.0310123	3824	tags=25%, list=7%, signal=23%	ATXN10/SAMM50/MYH9/DHX9/CD2AP/PPM1F/SMPD4/GTF2I/DSTN/NCKAP1/IPO7/ACTB/UBASH3B/RPN1/OXSM/PDLIM1/ACTA2/PRC1/WASF2/FLNB/RUFY1
EIF1B	0.858101	1.3966	0.00865231	1281	tags=18%, list=2%, signal=17%	SART3/BRK1/HNRNPM/PCBP2/AAAS/RPN1/RPA1/SMPD4/DHX9/OXSM/TARDBP/HNRNPU/SPART/GYS1/RAC1
RPL21P30	0.851397	1.39638	0.0206239	4107	tags=14%, list=7%, signal=13%	HNRNPH1/LRPPRC/RPN1/NDUFA10/UBASH3B/AAAS/PCBP2/PPM1F/ATXN10/RRP1/SQSTM1/ACTA1
RSL24D1	0.871943	1.39631	0.00665051	3209	tags=26%, list=6%, signal=25%	HNRNPM/DHX9/HNRNPA3/HNRNPH1/PCBP2/TARDBP/CD2AP/IPO7/SART3/GYS1/FANCI/HNRNPU/SMPD4/ACTG1/TRIP6/PRDX1/RRP1/NDUFA10/OXSM/ATXN10/DBN1/IPO4
COG1	0.902855	1.39625	0.00854666	2743	tags=30%, list=5%, signal=28%	DHX9/SMPD4/SART3/SAFB2/LRPPRC/IPO7/ANP32E/NSUN2/HNRNPU/HNRNPA3/NCKAP1/RUFY1/TARDBP/RRP1/CNOT1/FANCI/ATXN10/HNRNPM/ZHX2/CHCHD3/CD2AP/MYH9/CAPZB/DBN1/PCBP2
SRI	0.806313	1.39624	0.0195862	3909	tags=25%, list=7%, signal=23%	RAC1/UBASH3B/ACTN4/STRAP/GYS1/DBN1/RRP1/BOP1/NUBPL/HNRNPU/TARDBP/IPO4/NDUFA11/TRIP6/ARMC6/SLC7A11/ACTG1/ACTB/MYL6/HNRNPM/NDUFA10
MAP3K7CL	0.845144	1.39617	0.0112828	3264	tags=19%, list=6%, signal=18%	FLNA/ACTA2/MYH9/SPART/IPO7/WASF2/NUBPL/MRPS17/NDUFA11/CAPZB/SLC2A1/ACTG2/RPN1/DBN1/SLC2A3/SQSTM1
CBX3	0.9344	1.39615	0.000627084	1299	tags=24%, list=2%, signal=23%	RAC1/HNRNPU/TARDBP/HNRNPM/ABI2/CD2AP/SMPD4/AAAS/RPA1/RUFY1/ATXN10/LRPPRC/DHX9/DSTN/STRAP/SART3/CHCHD3/SLC2A1/SLC3A2/ACTG1
LSM6	0.82632	1.39595	0.0185166	2955	tags=23%, list=5%, signal=21%	NDUFC1/HNRNPA3/HNRNPM/ABI2/HNRNPU/SART3/SQSTM1/ACTB/ACTA2/PCBP2/NDUFS2/DSTN/UBASH3B/FLNA/TARDBP/CAPZB/CYFIP1/CHCHD3/SAMM50
CORO1C	0.92354	1.39589	0.00124346	1534	tags=24%, list=3%, signal=23%	SART3/NCKAP1/DHX9/SMPD4/RPA1/FANCI/HNRNPU/WASF2/GCN1/ABI2/TARDBP/RUFY1/ACTB/ACTG1/TLN1/ACTN4/IPO7/FLNA/ZHX2/UBASH3B
CDC34	0.848144	1.39571	0.0384168	5031	tags=29%, list=9%, signal=26%	SAFB2/BRK1/MYL6/RRP1/INF2/ACTB/ATXN10/PDLIM1/IQGAP1/NDUFA11/ACTG1/RAC1/ACTA1/RPN1/DBN1/TARDBP/ACTA2/SLC2A1/ACTG2/CHD4/GYS1/STRAP/ANP32E/ZHX2
NDUFA13	0.870131	1.39569	0.00310386	1183	tags=12%, list=2%, signal=12%	SMPD4/HNRNPH1/SAFB2/SART3/GCN1/ACTB/ANP32E/IPO4/GYS1/ACTG1
ZNF438	0.870561	1.39566	0.00516687	2201	tags=11%, list=4%, signal=10%	IQGAP1/PML/INF2/CYFIP1/UBASH3B/ABI2/SMPD4/DSTN/RAC1
PPP1R35	0.846783	1.39554	0.0244508	3039	tags=18%, list=6%, signal=17%	BOP1/RRP1/RAC1/SAFB2/TRIP6/CYFIP1/NDUFA11/CHCHD3/ANP32E/SLC7A11/SLC2A1/NDUFA10/FLNA/HNRNPA3/EPAS1
LRRC34	0.891707	1.39554	0.00400823	2736	tags=19%, list=5%, signal=18%	EPAS1/CHD4/ACTN4/DSTN/GTF2I/DHX9/CD2AP/HNRNPA3/PPM1F/TNKS1BP1/FLNA/CHCHD3/MYL6/NSUN2/MYH10/ACTA1
GPI	0.810191	1.39554	0.0200336	2995	tags=23%, list=5%, signal=21%	INF2/TRIP6/CHCHD3/DBN1/NCKAP1/SLC2A1/ACTA2/AAAS/NDUFS2/GYS1/IPO7/FLNB/SLC7A11/RAC1/HNRNPA3/STRAP/NDUFA10/PRDX1/ACTA1
RRP7A	0.806116	1.39553	0.0438217	2263	tags=18%, list=4%, signal=17%	BOP1/ATXN10/ZHX2/RRP1/PPM1F/BRK1/DBN1/MYH9/ACTB/TRIP6/RUFY1/LRPPRC/PML/MRPS17/NLN
GRINA	0.846392	1.39553	0.0325301	2590	tags=15%, list=5%, signal=15%	PRDX1/BOP1/SQSTM1/ZHX2/MYH9/NLN/RNH1/NDUFA10/FLNB/MYH10/GYS1/LRPPRC/CHCHD3
DTNBP1	0.870991	1.3955	0.00315422	3408	tags=31%, list=6%, signal=29%	MYL6/TARDBP/HNRNPA3/RAC1/PML/ACTB/CD2AP/RNH1/HNRNPM/RPA1/HNRNPH1/DSTN/BOP1/ABI2/CHD4/RRP1/ACTG1/MRPS17/ANP32E/SAFB2/FANCI/PDLIM1/MYH10/NUBPL/BRK1/CAPZB
AL356432.2	0.999782	1.39545	0.0385296	14	tags=2%, list=0%, signal=2%	CD2AP/HNRNPU
TDP1	0.894415	1.39544	0.00344853	2072	tags=24%, list=4%, signal=23%	HNRNPM/DHX9/SART3/RPA1/SMPD4/PCBP2/HNRNPA3/HNRNPU/FANCI/IPO7/NSUN2/ZHX2/CAPZB/AAAS/CHD4/GCN1/RPN1/ANP32E/FLNA/PDLIM1
PPARD	0.860976	1.39528	0.0179858	1644	tags=20%, list=3%, signal=20%	GCN1/SART3/PML/TLN1/CD2AP/SAFB2/ACTN4/HNRNPU/ACTA1/IQGAP1/HNRNPA3/FANCI/DBN1/DSTN/HNRNPH1/AAAS/CYFIP1
MTMR14	0.852753	1.3952	0.0163686	3873	tags=29%, list=7%, signal=27%	BRK1/AAAS/SMPD4/CAPZB/RRP1/SAFB2/DHX9/HNRNPM/OXSM/PRDX1/ATXN10/HNRNPA3/RUFY1/TARDBP/FANCI/LRPPRC/NCKAP1/RPN1/NDUFA11/ACTA1/NLN/PDLIM1/ACTB/DBN1
HS6ST1P1	0.868381	1.39518	0.00639143	1875	tags=17%, list=3%, signal=16%	GTF2I/CNOT1/ACTN4/FLNB/CYFIP1/CHD4/DBN1/MRPS17/IQGAP1/NUBPL/GCN1/SAMM50/SMPD4/CHCHD3
PXN	0.885509	1.39513	0.00330891	1772	tags=17%, list=3%, signal=16%	GCN1/SMPD4/SART3/ACTN4/SAFB2/TARDBP/HNRNPH1/RPA1/ABI2/PML/GYS1/PPM1F/AAAS/TRIP6
KIF9	0.832903	1.39511	0.0135748	2055	tags=17%, list=4%, signal=16%	BRK1/OXSM/RNH1/CAPZB/MYL6/LRPPRC/SART3/NDUFA10/STRAP/RPN1/CHD4/AAAS/PML/ZHX2
CCDC51	0.829146	1.39501	0.0215558	4729	tags=27%, list=9%, signal=25%	PRDX1/OXSM/BRK1/RNH1/LRPPRC/SQSTM1/BOP1/SMPD4/NDUFS2/CHCHD3/STRAP/NDUFS1/GCN1/ZHX2/ACTN4/NSUN2/SAMM50/RRP1/ACTG2/WASF2/SLC3A2/TARDBP/CAPZB
CEP41	0.856425	1.395	0.0126064	2790	tags=25%, list=5%, signal=24%	IPO7/DHX9/ACTB/HNRNPM/RNH1/ACTN4/WASF2/ABI2/CHCHD3/CD2AP/DBN1/UBASH3B/GYS1/ACTG1/RAC1/SQSTM1/TRIP6/BRK1/PML/NCKAP1/SLC2A1
BTRC	0.914713	1.39446	0.00759132	1716	tags=13%, list=3%, signal=13%	RPA1/DHX9/IPO7/SMPD4/CYFIP1/SART3/HNRNPM/GCN1/TNKS1BP1/SLC3A2/ABI2
STK11IP	0.893275	1.39441	0.00779075	2624	tags=25%, list=5%, signal=24%	SART3/HNRNPU/HNRNPA3/ACTG1/AAAS/DBN1/ABI2/GCN1/HNRNPM/SMPD4/LRPPRC/SAFB2/CYFIP1/TARDBP/INF2/WASF2/CNOT1/ATXN10/SPART/ACTB/RRP1
PRPF8	0.899352	1.39438	0.00835845	2508	tags=20%, list=5%, signal=19%	DHX9/RPA1/CYFIP1/MYH10/SART3/GCN1/CNOT1/BOP1/AAAS/IPO7/OXSM/TNKS1BP1/CD2AP/MYH9/EPAS1/NLN/SLC3A2
RFX8	0.911284	1.39425	0.00348708	670	tags=6%, list=1%, signal=6%	RNH1/CAPZB/PPM1F/NLN/AAAS
AC012005.1	0.933197	1.39424	0.033649	2951	tags=10%, list=5%, signal=9%	IPO7/OXSM/PPM1F/FANCI/NDUFA11/GCN1/PDLIM1/PML
UGT1A6	0.852972	1.39404	0.0491918	2625	tags=17%, list=5%, signal=16%	SQSTM1/NLN/CHD4/MYL6/NDUFA11/ZHX2/NDUFS1/ATXN10/SAFB2/NCKAP1/GCN1/OXSM/GTF2I/WASF2
PROCA1	0.858446	1.39404	0.0111469	2424	tags=13%, list=4%, signal=13%	SART3/AAAS/PCBP2/BRK1/FANCI/SMPD4/HNRNPU/HNRNPM/ANP32E/ABI2/NDUFA11
COQ10B	0.827825	1.39401	0.0214011	2760	tags=12%, list=5%, signal=11%	SART3/NDUFS1/NCKAP1/WASF2/GTF2I/ACTN4/NDUFS2/PRDX1/NUBPL/MYH10
LSM11	0.894517	1.39398	0.00206005	1553	tags=21%, list=3%, signal=21%	HNRNPH1/RUFY1/HNRNPA3/RPA1/IPO7/LRPPRC/HNRNPU/AAAS/CD2AP/MYH10/SART3/SLC7A11/DBN1/GTF2I/DHX9/NCKAP1/SMPD4/ACTB
SRC	0.883087	1.39395	0.003538	1985	tags=19%, list=4%, signal=18%	SMPD4/LRPPRC/DHX9/BOP1/SART3/SAFB2/SLC7A11/DBN1/BRK1/TARDBP/AAAS/CHD4/ACTG1/CD2AP/NCKAP1/MYH9
SKA2	0.854729	1.39391	0.0157998	4342	tags=23%, list=8%, signal=21%	DHX9/HNRNPA3/FANCI/AAAS/GYS1/PCBP2/SMPD4/ABI2/ACTB/RPN1/SLC7A11/BOP1/CNOT1/SART3/ACTBL2/HNRNPM/ACTG1/PRC1/ACTA2
ACOX3	0.77721	1.39389	0.0227499	3427	tags=18%, list=6%, signal=17%	ACTN4/TLN1/PPM1F/MYH9/CHCHD3/CNOT1/TARDBP/PML/NDUFS1/CHD4/ACTA1/STRAP/SMPD4/NDUFA11/DSTN
PPIC	0.815098	1.39383	0.0183137	889	tags=13%, list=2%, signal=13%	ABI2/DBN1/RAC1/RPN1/DSTN/TRIP6/NDUFA11/MYL6/NDUFC1/ATXN10/RUFY1
PUDP	0.84745	1.39383	0.0168683	2712	tags=23%, list=5%, signal=22%	GYS1/HNRNPU/HNRNPH1/DHX9/CYFIP1/DSTN/RPA1/WASF2/PCBP2/LRPPRC/HNRNPM/CHCHD3/OXSM/RAC1/TRIP6/TNKS1BP1/PRDX1/TLN1/EPAS1
SCYL1	0.851759	1.39378	0.0180217	1200	tags=17%, list=2%, signal=16%	TNKS1BP1/ACTN4/SMPD4/MYH9/SAFB2/SART3/CYFIP1/GCN1/FLNA/RNH1/TLN1/OXSM/RUFY1/WASF2
CARD10	0.852163	1.39377	0.012816	2216	tags=21%, list=4%, signal=21%	ATXN10/MYH9/INF2/HNRNPA3/HNRNPM/TNKS1BP1/HNRNPU/SAMM50/DBN1/FLNB/ACTA2/PPM1F/ACTB/NSUN2/OXSM/NLN/WASF2/RAC1
HDGF	0.882089	1.3937	0.00559957	3108	tags=23%, list=6%, signal=21%	DHX9/HNRNPU/ATXN10/TARDBP/HNRNPA3/ANP32E/SMPD4/NDUFS2/ACTG1/SART3/RNH1/RAC1/BOP1/GCN1/IPO4/PRDX1/SAMM50/TRIP6/MYL6
SNRNP70	0.899154	1.39353	0.00196619	3049	tags=19%, list=6%, signal=18%	SAFB2/TARDBP/RRP1/GYS1/AAAS/ABI2/HNRNPH1/IPO4/CHD4/PCBP2/NDUFA11/ACTG1/HNRNPM/NUBPL/SMPD4/ANP32E
AP001970.1	0.999382	1.39345	0.0247377	35	tags=1%, list=0%, signal=1%	CHD4
C1orf174	0.897251	1.39345	0.00537041	2038	tags=24%, list=4%, signal=23%	CAPZB/SMPD4/SART3/WASF2/TARDBP/HNRNPU/DHX9/SAFB2/MYH9/HNRNPM/RUFY1/ANP32E/RAC1/IQGAP1/CNOT1/GCN1/NCKAP1/PRDX1/RPN1/NLN
FRG1	0.809277	1.39345	0.0234084	2730	tags=19%, list=5%, signal=18%	BRK1/NDUFC1/NDUFA10/RAC1/MYL6/TARDBP/CNOT1/CHD4/ACTG2/IPO4/RNH1/PDLIM1/PCBP2/OXSM/NDUFA11/NUBPL
WDR12	0.891866	1.39344	0.0104858	2994	tags=26%, list=5%, signal=25%	NCKAP1/SMPD4/DHX9/LRPPRC/CD2AP/HNRNPU/IPO7/ANP32E/ZHX2/SAFB2/NLN/HNRNPA3/PRDX1/RNH1/BOP1/SART3/TARDBP/HNRNPH1/NDUFA11/NDUFA10/GCN1/RPA1
PSME4	0.859586	1.39341	0.0170428	3396	tags=29%, list=6%, signal=27%	GCN1/CNOT1/DHX9/IPO7/NCKAP1/CAPZB/CD2AP/RPN1/ABI2/SLC7A11/SPART/TRIP6/ZHX2/LRPPRC/HNRNPA3/MYH9/STRAP/MYL6/TNKS1BP1/HNRNPU/SART3/BOP1/FANCI/ACTG1
AL592295.4	0.869515	1.39335	0.0148406	2646	tags=24%, list=5%, signal=23%	TLN1/CYFIP1/ACTA2/ACTN4/GTF2I/DHX9/MYH9/RUFY1/SMPD4/HNRNPM/IQGAP1/NUBPL/WASF2/CNOT1/HNRNPU/NDUFS2/OXSM/CD2AP/ABI2/NSUN2
FAM177A1	0.783833	1.39334	0.0208383	5206	tags=21%, list=9%, signal=19%	SQSTM1/NUBPL/NLN/SLC3A2/ANP32E/AAAS/DSTN/CD2AP/ACTB/CYFIP1/SLC2A3/RUFY1/TNKS1BP1/ABI2/NDUFS2/PRC1/DHX9/CHCHD3
SMU1	0.917187	1.39324	0.00243162	2021	tags=20%, list=4%, signal=20%	SART3/SMPD4/HNRNPU/DHX9/HNRNPM/TLN1/RPA1/PCBP2/GYS1/ACTN4/GCN1/RUFY1/ACTB/NDUFA10/ABI2/BRK1/NDUFS2
AC092354.2	0.788296	1.39322	0.0269654	2350	tags=15%, list=4%, signal=15%	HNRNPM/CHD4/BRK1/TARDBP/HNRNPA3/MYL6/NDUFA10/SQSTM1/OXSM/SAFB2/FLNA/RRP1/FANCI
GEMIN4	0.880521	1.39318	0.0265815	2124	tags=17%, list=4%, signal=16%	RPA1/HNRNPU/GCN1/SART3/DHX9/RRP1/BOP1/INF2/MYL6/TARDBP/RNH1/GYS1/DBN1/HNRNPM
NF2	0.861852	1.39318	0.0121429	2594	tags=24%, list=5%, signal=23%	PPM1F/WASF2/HNRNPU/RAC1/ATXN10/SMPD4/SART3/INF2/GYS1/SLC7A11/NDUFA11/STRAP/GCN1/CHD4/CD2AP/SAMM50/ACTA1/AAAS/CHCHD3/ACTG1
RABL2B	0.892709	1.39302	0.00423795	376	tags=7%, list=1%, signal=7%	SMPD4/SART3/ATXN10/ABI2/SAMM50/DBN1
PKNOX1	0.891781	1.39299	0.00313753	1976	tags=29%, list=4%, signal=28%	DHX9/TARDBP/HNRNPU/HNRNPM/SMPD4/ANP32E/SART3/WASF2/HNRNPH1/GCN1/PML/HNRNPA3/ABI2/PPM1F/PCBP2/MRPS17/PRC1/PRDX1/NCKAP1/GYS1/CD2AP/BOP1/ACTN4/CHD4
SRPK1	0.890321	1.39272	0.00926553	3032	tags=29%, list=6%, signal=27%	CD2AP/DHX9/HNRNPU/LRPPRC/GCN1/SMPD4/IPO7/HNRNPA3/SART3/WASF2/HNRNPM/RPA1/CHD4/CNOT1/ANP32E/FANCI/NLN/PPM1F/TLN1/DBN1/STRAP/IPO4/FLNB/CHCHD3
LLGL1	0.901057	1.39251	0.00276842	2839	tags=30%, list=5%, signal=28%	SMPD4/SART3/RPA1/CYFIP1/TLN1/ACTN4/HNRNPM/HNRNPU/ABI2/IQGAP1/FANCI/DHX9/PPM1F/CHCHD3/NUBPL/LRPPRC/NCKAP1/RAC1/WASF2/TNKS1BP1/ACTB/STRAP/RRP1/SLC2A1/SPART
ULK1	0.832767	1.39229	0.0162538	2981	tags=14%, list=5%, signal=14%	SART3/DHX9/GCN1/ACTA1/MYL6/OXSM/TARDBP/BRK1/GYS1/CHD4/ACTN4/ABI2
TPD52L1	0.790688	1.39225	0.020209	3888	tags=15%, list=7%, signal=14%	SLC7A11/PRDX1/CAPZB/TRIP6/NDUFS2/HNRNPA3/PRC1/SLC3A2/ARMC6/BOP1/PML/RPA1/SAMM50
AC016405.3	0.838667	1.39224	0.0121533	2362	tags=17%, list=4%, signal=16%	BOP1/ZHX2/ATXN10/RRP1/SLC3A2/BRK1/ANP32E/NDUFC1/EPAS1/NDUFA11/NDUFS2/INF2/MYL6/UBASH3B
SDHC	0.879521	1.39215	0.0220801	2624	tags=17%, list=5%, signal=16%	NDUFS2/DHX9/MYH9/GTF2I/CYFIP1/NDUFA10/ATXN10/ACTA2/ACTA1/RUFY1/MRPS17/SMPD4/NDUFS1/DBN1
INTS13	0.901964	1.39215	0.00307252	2638	tags=27%, list=5%, signal=26%	STRAP/IPO7/HNRNPU/LRPPRC/SMPD4/DHX9/HNRNPA3/CYFIP1/AAAS/RPA1/ACTG1/SLC7A11/IQGAP1/FANCI/SPART/PDLIM1/SLC3A2/NCKAP1/PRDX1/CHCHD3/TRIP6/NDUFA10/BOP1
MEST	0.845591	1.39214	0.00915788	2884	tags=24%, list=5%, signal=23%	ABI2/HNRNPH1/SMPD4/SART3/ACTG1/MYH9/SLC7A11/MYL6/LRPPRC/BOP1/NDUFA10/ANP32E/HNRNPA3/ATXN10/MYH10/EPAS1/CD2AP/DBN1/DHX9/PRDX1
TARS2	0.840731	1.39202	0.0161809	1461	tags=12%, list=3%, signal=12%	NDUFS2/ANP32E/SQSTM1/ATXN10/RUFY1/NSUN2/PRDX1/NLN/OXSM/NUBPL
BCL2L13	0.885787	1.39201	0.0151985	1311	tags=15%, list=2%, signal=15%	ATXN10/MYH9/CYFIP1/CNOT1/DHX9/GTF2I/PPM1F/IPO7/SAMM50/FLNB/PDLIM1/NDUFA10/LRPPRC
INTS3	0.879707	1.39184	0.0217013	2918	tags=25%, list=5%, signal=24%	HNRNPU/SAFB2/DHX9/SART3/HNRNPM/RPA1/SMPD4/HNRNPH1/CD2AP/PPM1F/GYS1/TARDBP/ANP32E/ACTN4/TLN1/ATXN10/CHD4/FLNB/NSUN2/GCN1/MYL6
WDFY3-AS2	0.91252	1.39179	0.0034885	800	tags=10%, list=1%, signal=9%	NCKAP1/IQGAP1/ABI2/UBASH3B/FLNA/ACTG2/RPA1/DHX9
AKR1C2	0.851598	1.39176	0.0197389	2357	tags=12%, list=4%, signal=11%	NLN/SQSTM1/PRDX1/SLC7A11/BOP1/IQGAP1/TRIP6/AAAS/ARMC6/OXSM
MRPL19	0.868981	1.39164	0.00651106	2382	tags=14%, list=4%, signal=14%	NDUFS1/LRPPRC/DHX9/STRAP/NDUFS2/NCKAP1/HNRNPU/SAFB2/IPO7/GTF2I/CHCHD3/PCBP2
LINC00639	0.863956	1.39162	0.0248919	3705	tags=20%, list=7%, signal=19%	IQGAP1/ACTA1/ACTA2/TRIP6/SART3/NSUN2/FLNA/PRDX1/MYH10/PCBP2/NDUFA11/SPART/MYL6/EPAS1/PML/RAC1/ACTC1
RHOQP3	0.836863	1.39105	0.0163997	1815	tags=14%, list=3%, signal=14%	NCKAP1/TLN1/PML/FLNA/NSUN2/IQGAP1/PCBP2/MYH10/SART3/MYL6/ACTA2/IPO4
PLEKHG3	0.83993	1.391	0.0126315	3597	tags=25%, list=7%, signal=23%	INF2/CYFIP1/MYH9/ACTB/TNKS1BP1/RPN1/FLNB/FLNA/GCN1/RRP1/NCKAP1/GTF2I/ABI2/PPM1F/IQGAP1/CAPZB/ATXN10/IPO4/MYL6/EPAS1/MRPS17
CD302	0.889725	1.39098	0.00322498	2115	tags=14%, list=4%, signal=14%	CNOT1/EPAS1/GTF2I/MYL6/MYH10/NDUFS1/CHD4/RRP1/NDUFC1/RNH1/CD2AP/CYFIP1
RN7SKP80	0.837495	1.39095	0.0162168	2806	tags=13%, list=5%, signal=12%	HNRNPA3/SMPD4/DHX9/OXSM/ACTA1/SAMM50/ACTB/STRAP/SLC7A11/ACTN4/IPO7
SUPT5H	0.909141	1.39092	0.00190656	985	tags=17%, list=2%, signal=16%	HNRNPM/ACTN4/HNRNPU/SART3/GCN1/SMPD4/TARDBP/GYS1/PRC1/PCBP2/SAFB2/HNRNPA3/WASF2/RRP1
GART	0.907007	1.39081	0.00216074	956	tags=20%, list=2%, signal=20%	LRPPRC/IPO7/GCN1/HNRNPU/DHX9/SART3/FLNB/SMPD4/ACTN4/GTF2I/ATXN10/HNRNPM/IQGAP1/CYFIP1/RPA1/STRAP/HNRNPA3
SSTR1	0.82076	1.39069	0.032491	3386	tags=12%, list=6%, signal=11%	NUBPL/PRDX1/PPM1F/PDLIM1/RRP1/BOP1/MYL6/NDUFA10/MYH10/ARMC6
DSP	0.879466	1.39051	0.00996811	2727	tags=25%, list=5%, signal=24%	GTF2I/DHX9/LRPPRC/CD2AP/SMPD4/ZHX2/HNRNPU/IPO7/FLNB/NUBPL/RUFY1/NDUFS2/NSUN2/OXSM/HNRNPM/SLC3A2/CYFIP1/PPM1F/NCKAP1/EPAS1/ACTG1
QRSL1	0.857743	1.39038	0.0365998	1566	tags=21%, list=3%, signal=21%	HNRNPA3/CHCHD3/HNRNPM/FANCI/LRPPRC/ATXN10/DHX9/TLN1/GCN1/CD2AP/HNRNPU/RNH1/RPN1/SLC7A11/FLNB/ACTN4/SART3/PRC1
DHX37	0.90999	1.39035	0.00208144	2189	tags=25%, list=4%, signal=24%	GCN1/SART3/HNRNPU/SMPD4/RUFY1/FANCI/BOP1/STRAP/WASF2/HNRNPA3/LRPPRC/ZHX2/RAC1/AAAS/SAFB2/SQSTM1/RPA1/DHX9/PRC1/TARDBP/RNH1
AC073082.1	0.967097	1.39034	0.0279656	1518	tags=7%, list=3%, signal=7%	SQSTM1/NDUFC1/HNRNPA3/PML/DBN1/ACTC1
SVIP	0.814334	1.39034	0.0186769	2774	tags=17%, list=5%, signal=16%	HNRNPA3/FANCI/HNRNPH1/ANP32E/SART3/NCKAP1/CD2AP/CYFIP1/MRPS17/STRAP/CHCHD3/CHD4/NDUFC1/NDUFS1
PAK1IP1	0.900721	1.39026	0.0070514	2558	tags=23%, list=5%, signal=22%	CD2AP/DHX9/LRPPRC/GCN1/RUFY1/NSUN2/CHCHD3/ACTB/IPO7/BOP1/MYH10/NLN/CYFIP1/GTF2I/RAC1/HNRNPM/NDUFS2/ATXN10/HNRNPA3
CALR3	0.837714	1.39015	0.0444811	3539	tags=23%, list=6%, signal=21%	HNRNPU/LRPPRC/SAMM50/ZHX2/SQSTM1/PRC1/GCN1/CHD4/ACTG2/FLNA/RRP1/MRPS17/AAAS/ARMC6/RNH1/SLC3A2/HNRNPM/NLN/CD2AP
HIRA	0.820883	1.3901	0.0311249	3553	tags=17%, list=6%, signal=16%	SAMM50/PPM1F/RRP1/SLC7A11/SLC2A3/ACTB/CHD4/FLNB/SAFB2/DHX9/GYS1/MRPS17/FANCI/HNRNPU
MNAT1	0.853481	1.38996	0.0197966	3847	tags=25%, list=7%, signal=23%	HNRNPH1/PCBP2/SART3/DHX9/EPAS1/ATXN10/HNRNPM/BOP1/RPA1/TRIP6/AAAS/NDUFC1/CAPZB/NDUFS1/SLC3A2/ANP32E/DSTN/ZHX2/ACTC1/HNRNPU/RUFY1
AC019077.1	0.807531	1.38983	0.0192262	4108	tags=24%, list=7%, signal=22%	BRK1/NDUFC1/NCKAP1/TARDBP/IPO4/ARMC6/TLN1/HNRNPM/SLC2A1/MYL6/HNRNPA3/TNKS1BP1/ACTA1/FLNB/PCBP2/CD2AP/DSTN/ACTA2/SLC2A3/ACTC1
AC091167.1	0.872119	1.38967	0.0101475	1138	tags=15%, list=2%, signal=15%	GTF2I/CNOT1/MYH9/NCKAP1/ZHX2/CYFIP1/ACTN4/MYH10/IPO7/SLC3A2/FLNB/PRC1/LRPPRC
TSPAN4	0.799751	1.38952	0.0117077	1313	tags=10%, list=2%, signal=9%	RNH1/UBASH3B/FLNA/RRP1/ABI2/HNRNPM/CHD4/PML
EXOC3	0.851771	1.38949	0.0164035	2608	tags=23%, list=5%, signal=22%	NSUN2/AAAS/ACTN4/SART3/HNRNPU/RUFY1/RPA1/GCN1/SAMM50/RNH1/SAFB2/PRDX1/ARMC6/NDUFS2/SMPD4/BOP1/RAC1/MYH10/ABI2
AC090907.1	0.847824	1.38949	0.0127391	1875	tags=14%, list=3%, signal=14%	ACTG1/PRC1/HNRNPH1/CHD4/ACTG2/DBN1/GTF2I/CYFIP1/NLN/NDUFA11/TLN1/FLNB
SLC25A17	0.832318	1.38941	0.0245793	3359	tags=25%, list=6%, signal=24%	MYH9/ATXN10/FANCI/IPO7/GTF2I/NCKAP1/SAMM50/AAAS/DHX9/CHCHD3/HNRNPA3/PML/ACTA1/SMPD4/PCBP2/NDUFS2/BRK1/LRPPRC/ACTG1/RRP1/IPO4
VN1R69P	1	1.3894	1e-10	1	tags=1%, list=0%, signal=1%	PRDX1
DSTN	0.847724	1.38934	0.00617424	3136	tags=19%, list=6%, signal=18%	RAC1/CD2AP/RNH1/IQGAP1/NCKAP1/FLNA/NLN/MYH9/STRAP/EPAS1/NSUN2/UBASH3B/SLC2A1/AAAS/ACTN4/SLC3A2
TSPAN17	0.832466	1.38931	0.0214258	3230	tags=26%, list=6%, signal=25%	PPM1F/RUFY1/SQSTM1/PML/NLN/ABI2/TNKS1BP1/BOP1/BRK1/RPN1/DBN1/ACTG2/ARMC6/NDUFA10/MYH10/MYL6/UBASH3B/RNH1/SLC2A3/IPO7/SLC3A2/MRPS17
GGA2	0.891955	1.3893	0.00385182	2362	tags=24%, list=4%, signal=23%	RPA1/ACTN4/GTF2I/SART3/CD2AP/HNRNPU/IPO7/NCKAP1/SMPD4/DHX9/IQGAP1/HNRNPH1/WASF2/TARDBP/CYFIP1/GYS1/SPART/AAAS/CNOT1/NDUFS2
MED8	0.870566	1.38924	0.0127672	3159	tags=19%, list=6%, signal=18%	TARDBP/BRK1/PRDX1/FANCI/WASF2/CAPZB/PRC1/ACTB/IPO4/SAFB2/RAC1/BOP1/MYH10/MYL6/RPN1/ACTG2
MTATP8P2	0.790552	1.38923	0.0385675	4551	tags=17%, list=8%, signal=15%	MYL6/BRK1/CHCHD3/NSUN2/GYS1/RRP1/NUBPL/ACTB/RPA1/SAMM50/ACTG2/MYH9/IPO4/IQGAP1
DLST	0.85537	1.38917	0.0145475	2446	tags=19%, list=4%, signal=18%	CNOT1/GTF2I/CYFIP1/TLN1/SQSTM1/STRAP/EPAS1/NDUFA11/SPART/SART3/ACTA2/TRIP6/RNH1/INF2/NLN/MYH9
MAGIX	0.786527	1.38916	0.0165064	3264	tags=25%, list=6%, signal=24%	TARDBP/BOP1/NDUFS1/AAAS/TLN1/IPO4/NDUFA10/RPN1/PML/ABI2/NDUFA11/SLC2A3/SQSTM1/ANP32E/DBN1/NDUFS2/EPAS1/FLNB/GCN1/ATXN10/ACTG2
MPP6	0.8635	1.38913	0.00872431	1965	tags=26%, list=4%, signal=25%	CHCHD3/LRPPRC/IPO7/SART3/GCN1/DSTN/CD2AP/BOP1/NLN/STRAP/GTF2I/HNRNPU/ZHX2/GYS1/CYFIP1/IPO4/HNRNPA3/RUFY1/PRDX1/ANP32E/TARDBP/TNKS1BP1
AC018926.2	0.767789	1.38912	0.0235276	5804	tags=26%, list=11%, signal=23%	PRC1/CHD4/NDUFS1/TNKS1BP1/ACTA1/NDUFA11/FANCI/PML/HNRNPA3/MYL6/FLNB/ACTG1/PPM1F/MRPS17/NUBPL/TARDBP/SART3/SLC2A1/IQGAP1/IPO4/MYH10/RNH1
EPB41L1	0.875129	1.38909	0.00620302	967	tags=12%, list=2%, signal=12%	STRAP/FANCI/RPA1/HNRNPH1/DBN1/TRIP6/NSUN2/GCN1/GYS1/ARMC6
ATP5F1A	0.867302	1.38892	0.00556978	1999	tags=27%, list=4%, signal=26%	NDUFS1/STRAP/CHCHD3/NDUFA10/TRIP6/NDUFS2/NUBPL/ACTN4/DBN1/CNOT1/GYS1/NSUN2/CYFIP1/PDLIM1/WASF2/NDUFC1/MRPS17/SAMM50/OXSM/ACTB/HNRNPM/SMPD4/ZHX2
AC009961.1	0.827796	1.38876	0.00823408	3166	tags=17%, list=6%, signal=16%	PCBP2/SMPD4/HNRNPU/MYH9/FANCI/NDUFA11/HNRNPA3/AAAS/LRPPRC/IPO7/ACTG2/ATXN10/ANP32E/PRC1
TM9SF1	0.856227	1.38857	0.0156399	2614	tags=25%, list=5%, signal=24%	ACTN4/SART3/RPN1/HNRNPM/CD2AP/GCN1/HNRNPA3/DHX9/SAFB2/RPA1/FLNA/DSTN/IPO4/ACTG1/INF2/TRIP6/SMPD4/SLC2A1/GYS1/RAC1/CAPZB
ZBTB17	0.903766	1.38851	0.00352037	2259	tags=23%, list=4%, signal=22%	CAPZB/SAFB2/TARDBP/WASF2/RNH1/AAAS/HNRNPU/BRK1/SART3/SMPD4/PML/GYS1/TNKS1BP1/ANP32E/PCBP2/RUFY1/PRC1/RAC1/GTF2I
GATA1	0.874808	1.38847	0.0484115	1681	tags=6%, list=3%, signal=6%	ZHX2/RAC1/GTF2I/SLC7A11/MYH10
RBM26	0.872587	1.38845	0.0105033	2709	tags=20%, list=5%, signal=19%	SART3/SMPD4/CD2AP/DHX9/HNRNPU/HNRNPH1/HNRNPA3/ABI2/NCKAP1/ACTG2/HNRNPM/GYS1/IPO7/TNKS1BP1/ATXN10/PPM1F/RRP1
ZNF749	0.893643	1.38831	0.00763553	2564	tags=20%, list=5%, signal=19%	DHX9/IPO7/SART3/HNRNPM/LRPPRC/GCN1/HNRNPU/SMPD4/MYH9/STRAP/SAMM50/ACTN4/ACTA1/HNRNPH1/DBN1/CHD4/PRC1
AKR1C1	0.833909	1.38815	0.0332103	3575	tags=15%, list=6%, signal=14%	SQSTM1/NLN/SLC7A11/PRDX1/RNH1/BOP1/SLC3A2/IQGAP1/LRPPRC/CAPZB/OXSM/WASF2/SLC2A3
RBM10	0.912652	1.388	0.000765671	1504	tags=23%, list=3%, signal=22%	AAAS/TARDBP/FANCI/HNRNPM/SAFB2/HNRNPU/PCBP2/GYS1/RPA1/DHX9/GCN1/ACTN4/SART3/LRPPRC/RNH1/CHD4/SMPD4/RPN1/MYL6
COMMD5	0.895939	1.38797	0.0338983	1478	tags=13%, list=3%, signal=13%	BOP1/IPO4/ZHX2/HNRNPH1/PDLIM1/ACTB/AAAS/NDUFA11/MYL6/RRP1/MYH9
EXOC2	0.893679	1.38788	0.0138802	2371	tags=21%, list=4%, signal=21%	DHX9/NCKAP1/CD2AP/IPO7/CNOT1/ACTG1/NDUFS2/HNRNPU/RPA1/STRAP/GTF2I/GCN1/ZHX2/ANP32E/NSUN2/PML/MYH9/SLC3A2
IWS1	0.90638	1.38784	0.00186037	2653	tags=25%, list=5%, signal=24%	SART3/SMPD4/DHX9/HNRNPU/ATXN10/CD2AP/ABI2/HNRNPA3/RPA1/IQGAP1/CYFIP1/NDUFA10/RPN1/NSUN2/RUFY1/ARMC6/NLN/TARDBP/WASF2/NCKAP1/GYS1
PSMD7	0.890991	1.38774	0.0211399	1943	tags=23%, list=4%, signal=22%	CNOT1/CYFIP1/DHX9/MYH9/NDUFS1/CHCHD3/GTF2I/RNH1/SART3/FLNA/NDUFA11/IQGAP1/NSUN2/GYS1/STRAP/NDUFA10/TLN1/SQSTM1/ACTG1
MICOS10	0.843928	1.38773	0.00822759	4608	tags=24%, list=8%, signal=22%	TARDBP/CAPZB/WASF2/RAC1/GYS1/AAAS/FLNB/MYL6/PRC1/BOP1/RPN1/NDUFS2/SLC2A1/PRDX1/FANCI/PPM1F/DBN1/NCKAP1/ACTB/SLC2A3
KRT8P33	0.790012	1.38771	0.0356688	3884	tags=21%, list=7%, signal=20%	ACTN4/RNH1/SMPD4/MYH9/PCBP2/ACTG1/TNKS1BP1/CNOT1/RPN1/MRPS17/TARDBP/NLN/FLNB/RPA1/TLN1/NSUN2/NUBPL/TRIP6
LAMB2	0.815346	1.38769	0.0256419	3310	tags=23%, list=6%, signal=21%	TLN1/NUBPL/FLNB/FLNA/NCKAP1/ACTN4/MYH9/SLC3A2/HNRNPM/CYFIP1/NDUFC1/HNRNPA3/MYL6/BRK1/PDLIM1/CNOT1/ACTB/ACTA2/SQSTM1
GTF3C1	0.911794	1.38768	0.00575372	1385	tags=24%, list=3%, signal=23%	SART3/ACTN4/CNOT1/HNRNPM/SMPD4/FANCI/WASF2/FLNB/IQGAP1/NCKAP1/MYH9/RNH1/CHD4/GCN1/CAPZB/TARDBP/GYS1/ARMC6/ATXN10/DHX9
SURF4	0.846146	1.38767	0.0185237	3861	tags=25%, list=7%, signal=23%	RPN1/SART3/BRK1/TLN1/CNOT1/STRAP/ACTC1/ACTA2/NDUFA11/GYS1/SAFB2/IPO7/EPAS1/IQGAP1/MYH10/ARMC6/HNRNPM/GCN1/RAC1/ACTG1/MYL6
RNVU1-8	0.81936	1.38763	0.0173731	3062	tags=17%, list=6%, signal=16%	ANP32E/TARDBP/LRPPRC/RNH1/NDUFA11/GTF2I/SAFB2/PRC1/HNRNPM/MYH9/RPA1/NSUN2/TNKS1BP1/SLC3A2
PLIN5	0.831763	1.38756	0.0150336	3390	tags=20%, list=6%, signal=19%	BRK1/STRAP/GCN1/RAC1/ACTG1/CAPZB/DBN1/LRPPRC/HNRNPA3/ACTN4/NDUFA11/HNRNPM/AAAS/IQGAP1/SPART/UBASH3B/ACTA1
TAF12	0.842032	1.38755	0.0345622	3212	tags=20%, list=6%, signal=19%	PRDX1/CAPZB/WASF2/OXSM/TARDBP/RPN1/HNRNPU/SQSTM1/MYL6/RUFY1/ACTG2/NSUN2/PCBP2/SAFB2/FANCI/PDLIM1/AAAS
DDX56	0.859792	1.38754	0.0292882	1606	tags=19%, list=3%, signal=19%	RAC1/RRP1/GCN1/HNRNPM/TARDBP/PCBP2/NDUFS2/PML/IPO4/NDUFA10/BRK1/DSTN/FLNB/HNRNPU/AAAS/SLC7A11
HSBP1	0.863886	1.38754	0.0279116	1434	tags=18%, list=3%, signal=17%	CAPZB/TARDBP/RAC1/GYS1/HNRNPA3/MYL6/BRK1/ZHX2/NDUFA10/HNRNPM/SPART/NDUFC1/CHCHD3/ACTG1/SLC2A1
RETREG2	0.862447	1.38749	0.00774306	3173	tags=30%, list=6%, signal=28%	NDUFA10/LRPPRC/DHX9/SMPD4/MYH9/BRK1/AAAS/NCKAP1/NDUFS1/RPA1/ZHX2/HNRNPM/HNRNPH1/STRAP/FLNB/ACTA2/NDUFS2/HNRNPA3/SART3/TRIP6/ATXN10/SQSTM1/CAPZB/FANCI/PML
TRIT1	0.881137	1.38748	0.0105417	1831	tags=17%, list=3%, signal=16%	SART3/SLC2A1/HNRNPH1/CAPZB/HNRNPU/HNRNPA3/TARDBP/AAAS/MYH10/PCBP2/ACTG1/PRDX1/PPM1F/IPO7
AL035456.1	0.862795	1.3874	0.0112521	1282	tags=14%, list=2%, signal=14%	DHX9/HNRNPM/HNRNPA3/IPO7/GCN1/SMPD4/CD2AP/HNRNPU/PRC1/IPO4/LRPPRC/GYS1
BX537318.1	0.823371	1.38726	0.01029	2438	tags=13%, list=4%, signal=13%	AAAS/SAMM50/MYH9/PDLIM1/ATXN10/DSTN/SLC3A2/ZHX2/RNH1/SLC7A11/INF2
RNU6-608P	0.999891	1.38724	0.0198399	7	tags=1%, list=0%, signal=1%	RPA1
CASC16	0.889541	1.38721	0.0345503	3648	tags=15%, list=7%, signal=14%	BOP1/SLC7A11/EPAS1/GTF2I/RAC1/SAMM50/NDUFA11/SQSTM1/RPA1/TNKS1BP1/FANCI/RPN1/MYH10
IPO9-AS1	0.819614	1.38717	0.0260705	3152	tags=15%, list=6%, signal=15%	SAFB2/PRC1/NDUFA11/SLC2A1/HNRNPA3/MYH10/TARDBP/PCBP2/RAC1/BRK1/SQSTM1/NDUFC1/SMPD4
DDX1	0.911439	1.38715	0.00181773	1739	tags=26%, list=3%, signal=25%	LRPPRC/HNRNPU/DHX9/STRAP/RPA1/NCKAP1/SART3/NDUFS1/IPO4/CAPZB/BRK1/PRDX1/SMPD4/UBASH3B/GYS1/FANCI/NUBPL/HNRNPM/AAAS/IPO7/ACTN4/HNRNPA3
AL021997.1	0.851955	1.38697	0.0382881	1342	tags=11%, list=2%, signal=10%	LRPPRC/GCN1/CNOT1/HNRNPH1/NDUFC1/NDUFS1/IPO7/WASF2/NCKAP1
MAPKAPK5	0.933409	1.38693	0.000187515	1672	tags=30%, list=3%, signal=29%	SART3/HNRNPM/HNRNPU/FANCI/HNRNPH1/TARDBP/GCN1/RPA1/DHX9/HNRNPA3/ANP32E/SMPD4/LRPPRC/AAAS/CD2AP/ARMC6/PCBP2/IPO7/NUBPL/SAFB2/RAC1/ABI2/GTF2I/ACTB/RUFY1
HAT1	0.912537	1.38692	0.00268577	2336	tags=24%, list=4%, signal=23%	DHX9/RPA1/HNRNPM/HNRNPA3/FANCI/HNRNPU/ANP32E/NCKAP1/SMPD4/LRPPRC/ABI2/AAAS/IPO7/ATXN10/EPAS1/DBN1/CD2AP/GTF2I/HNRNPH1/MYL6
AC015802.5	0.837184	1.38685	0.0216996	1042	tags=7%, list=2%, signal=7%	NDUFA11/SMPD4/PRDX1/EPAS1/SLC2A1/PRC1
AGPS	0.917487	1.38664	0.000865922	1424	tags=25%, list=3%, signal=24%	LRPPRC/NCKAP1/HNRNPA3/CD2AP/MYH9/SART3/HNRNPU/DHX9/IPO7/SLC7A11/SMPD4/SQSTM1/ZHX2/GCN1/CNOT1/CAPZB/ATXN10/BOP1/SLC2A1/WASF2/ABI2
MRPL44	0.881136	1.38661	0.0128796	3151	tags=30%, list=6%, signal=28%	NDUFA10/RPA1/GTF2I/ATXN10/SAMM50/SMPD4/CNOT1/MYH10/OXSM/HNRNPM/NDUFS1/SART3/RUFY1/DHX9/LRPPRC/ANP32E/MYL6/ZHX2/NUBPL/NDUFS2/RNH1/PPM1F/BRK1/IPO7/RRP1
LINC00618	0.87705	1.3866	0.0150204	2409	tags=11%, list=4%, signal=10%	DSTN/SLC2A3/SAFB2/HNRNPA3/ACTA1/ATXN10/OXSM/NLN/TRIP6
SRXN1	0.909236	1.38644	0.00880156	1903	tags=12%, list=3%, signal=12%	PRDX1/NLN/GCN1/SQSTM1/IPO7/NDUFA11/NCKAP1/ARMC6/IPO4/SLC7A11
ITGAV	0.914067	1.38638	0.000831221	1634	tags=17%, list=3%, signal=16%	NCKAP1/IQGAP1/UBASH3B/FLNA/WASF2/DSTN/SLC7A11/NLN/NDUFA11/SQSTM1/ACTB/SLC2A3/ZHX2/SLC2A1
UNC45A	0.863013	1.38638	0.00950031	2822	tags=24%, list=5%, signal=23%	FANCI/RNH1/CHCHD3/RUFY1/CAPZB/AAAS/HNRNPM/PRC1/FLNA/GYS1/EPAS1/CYFIP1/WASF2/SART3/IPO7/NDUFA11/NLN/BRK1/SLC2A3/ATXN10
LINC02336	0.853182	1.38636	0.0382586	1296	tags=7%, list=2%, signal=7%	NLN/SQSTM1/SPART/SMPD4/CHCHD3/BOP1
CLUHP5	0.999873	1.38623	0.00975234	8	tags=1%, list=0%, signal=1%	TLN1
TRIAP1	0.805598	1.38622	0.0350444	2312	tags=15%, list=4%, signal=15%	PCBP2/GCN1/SART3/RRP1/SMPD4/AAAS/HNRNPU/INF2/MYL6/PPM1F/RUFY1/UBASH3B/OXSM
ACTG1P24	0.829121	1.38618	0.01611	2823	tags=15%, list=5%, signal=15%	SMPD4/HNRNPU/SART3/GCN1/AAAS/NCKAP1/ANP32E/NSUN2/HNRNPA3/ACTA2/DBN1/TARDBP/TRIP6
SRSF12	0.861855	1.38613	0.0113502	709	tags=12%, list=1%, signal=12%	TARDBP/ABI2/HNRNPU/HNRNPM/HNRNPA3/HNRNPH1/SART3/PCBP2/ACTB/PRC1
SMIM7	0.830222	1.38594	0.0173572	4715	tags=31%, list=9%, signal=28%	NDUFA11/CHD4/BRK1/CNOT1/STRAP/NDUFS2/RRP1/TLN1/RPA1/PPM1F/PCBP2/SLC7A11/SAMM50/MRPS17/INF2/ACTB/ABI2/IPO4/TNKS1BP1/GYS1/IPO7/NDUFS1/CYFIP1/EPAS1/RPN1/GCN1
IQCB1	0.917295	1.38588	0.00243082	1418	tags=18%, list=3%, signal=17%	HNRNPH1/HNRNPA3/DHX9/HNRNPU/SART3/FANCI/HNRNPM/ABI2/TARDBP/IQGAP1/SLC2A1/CD2AP/ANP32E/SMPD4/STRAP
MVP	0.859331	1.38581	0.00951119	1822	tags=15%, list=3%, signal=15%	SQSTM1/DSTN/UBASH3B/RNH1/FLNA/INF2/PRDX1/TNKS1BP1/PML/SLC2A1/ACTB/ACTG1/OXSM
CSNK1D	0.922511	1.3858	0.00253528	1311	tags=26%, list=2%, signal=26%	SART3/SMPD4/HNRNPM/HNRNPU/SAFB2/FANCI/GYS1/TARDBP/HNRNPA3/GCN1/AAAS/RPA1/ACTN4/HNRNPH1/ATXN10/DHX9/PCBP2/PRC1/ACTG1/ANP32E/RUFY1/ARMC6
SZRD1	0.887491	1.38577	0.00498802	1094	tags=14%, list=2%, signal=14%	WASF2/CAPZB/RNH1/SLC2A1/FANCI/AAAS/TARDBP/CHCHD3/SART3/PCBP2/MYH9/PRDX1
ACAD10	0.766996	1.38573	0.035889	2411	tags=17%, list=4%, signal=16%	LRPPRC/SART3/GCN1/NDUFS2/ACTN4/NUBPL/NSUN2/MYL6/NDUFS1/TNKS1BP1/ACTBL2/NDUFC1/NDUFA11/GTF2I
SEPHS1	0.87428	1.38571	0.00901358	2503	tags=21%, list=5%, signal=20%	SMPD4/RPA1/HNRNPU/HNRNPM/ABI2/SART3/HNRNPH1/ATXN10/DHX9/HNRNPA3/TARDBP/WASF2/AAAS/FANCI/OXSM/NDUFS1/PDLIM1/ACTA1
ILDR2	0.819652	1.38569	0.0232634	2699	tags=11%, list=5%, signal=10%	PRDX1/RPN1/HNRNPU/RUFY1/CNOT1/SQSTM1/MRPS17/PML/SLC7A11
FBXW8	0.884967	1.38568	0.00835073	2797	tags=29%, list=5%, signal=27%	SART3/DHX9/HNRNPU/SMPD4/HNRNPH1/IPO7/FANCI/HNRNPA3/FLNB/GCN1/SQSTM1/HNRNPM/ABI2/ACTG1/ACTN4/NUBPL/CAPZB/NSUN2/SLC3A2/RPA1/ATXN10/TARDBP/NLN/BOP1
CAHM	0.846533	1.38566	0.0219525	4428	tags=25%, list=8%, signal=23%	CHD4/TARDBP/RRP1/MYL6/BRK1/PCBP2/AAAS/NDUFA11/NUBPL/NSUN2/DBN1/ACTA2/EPAS1/NDUFS1/DHX9/SART3/IPO4/RUFY1/OXSM/ACTG1/ATXN10
SMYD4	0.903881	1.38559	0.0146658	2449	tags=25%, list=4%, signal=24%	RPA1/HNRNPA3/HNRNPU/MYH10/ABI2/ACTN4/DHX9/CD2AP/CHCHD3/GTF2I/FLNB/PRC1/PCBP2/GYS1/TNKS1BP1/SLC2A1/AAAS/MYH9/NCKAP1/LRPPRC/SPART
ARMCX5-GPRASP2	0.840076	1.3854	0.0118066	2345	tags=21%, list=4%, signal=21%	HNRNPU/TARDBP/RPA1/SAFB2/HNRNPH1/HNRNPM/DSTN/RAC1/SMPD4/GYS1/NDUFC1/PCBP2/DHX9/ANP32E/ZHX2/ABI2/OXSM/MRPS17
PYM1	0.869676	1.3854	0.00404286	3258	tags=21%, list=6%, signal=20%	MYL6/PCBP2/AAAS/CHD4/RRP1/HNRNPM/TARDBP/BRK1/SAFB2/ACTB/MRPS17/EPAS1/HNRNPU/GCN1/PML/SART3/TNKS1BP1/GYS1
OFD1P12Y	0.999909	1.38533	1e-10	6	tags=1%, list=0%, signal=1%	ANP32E
AL033397.1	0.853415	1.38531	0.0397112	1212	tags=8%, list=2%, signal=8%	NLN/SQSTM1/PRDX1/SLC2A1/UBASH3B/AAAS/NDUFA11
SLC25A26	0.796812	1.38531	0.0276344	2909	tags=20%, list=5%, signal=19%	BRK1/CHD4/NDUFA10/TRIP6/ARMC6/RNH1/PCBP2/AAAS/STRAP/RPN1/GCN1/OXSM/LRPPRC/CYFIP1/RUFY1/CAPZB/CD2AP
ATG101	0.90819	1.38531	0.00432772	2700	tags=29%, list=5%, signal=27%	FLNA/SART3/RNH1/CHCHD3/RPN1/HNRNPM/DHX9/FANCI/CAPZB/MYL6/RPA1/AAAS/NDUFA10/PML/ATXN10/IQGAP1/PRDX1/IPO7/ACTA1/DSTN/CYFIP1/ABI2/SAFB2/NSUN2
ZCCHC9	0.820665	1.38522	0.0303532	1652	tags=15%, list=3%, signal=15%	AAAS/SMPD4/DHX9/CYFIP1/HNRNPU/HNRNPH1/RUFY1/IPO7/NSUN2/PRC1/BOP1/NLN/OXSM
SMOC1	0.80096	1.38498	0.0116591	3316	tags=15%, list=6%, signal=15%	GYS1/ACTG1/SLC7A11/RUFY1/SQSTM1/SAFB2/INF2/UBASH3B/MYH10/DHX9/WASF2/ACTA2/STRAP
SUB1	0.850441	1.38477	0.00907521	844	tags=18%, list=2%, signal=18%	DHX9/HNRNPM/HNRNPA3/TARDBP/BRK1/FANCI/RAC1/CD2AP/MYL6/HNRNPH1/ATXN10/BOP1/SQSTM1/SART3/PDLIM1
HDAC1	0.881962	1.38476	0.00839472	2473	tags=30%, list=4%, signal=28%	TARDBP/HNRNPU/HNRNPM/ABI2/PRDX1/WASF2/SAFB2/DHX9/PCBP2/IQGAP1/GYS1/RPA1/HNRNPA3/TLN1/HNRNPH1/RUFY1/RAC1/CAPZB/BRK1/DBN1/NDUFA11/LRPPRC/FANCI/SART3/NDUFC1
ST6GALNAC4P1	0.775082	1.38467	0.0236619	2311	tags=12%, list=4%, signal=11%	AAAS/SAFB2/HNRNPH1/HNRNPA3/RNH1/ACTC1/SMPD4/ACTB/MYH10/MRPS17
ST3GAL1	0.759395	1.38462	0.0233873	4183	tags=29%, list=8%, signal=26%	NDUFS1/HNRNPU/INF2/ACTN4/CHD4/NUBPL/PRDX1/FLNB/IPO7/PDLIM1/WASF2/NCKAP1/RAC1/TNKS1BP1/RUFY1/SLC3A2/MYH10/SART3/SQSTM1/SMPD4/UBASH3B/NDUFC1/OXSM/TRIP6
BFSP1	0.838749	1.38456	0.012831	2894	tags=20%, list=5%, signal=19%	ABI2/HNRNPM/ACTN4/SART3/RRP1/SAFB2/RPA1/SMPD4/BRK1/PCBP2/SLC3A2/PML/PDLIM1/PRC1/TARDBP/ACTA1/HNRNPU
ATP9A	0.85453	1.38452	0.00673228	2669	tags=18%, list=5%, signal=17%	NCKAP1/FLNB/LRPPRC/IPO7/ACTN4/SMPD4/MYH9/NDUFS2/ABI2/RUFY1/DHX9/GCN1/INF2/FLNA/ACTG2
SFSWAP	0.945342	1.38452	0.000201051	749	tags=19%, list=1%, signal=19%	SMPD4/HNRNPA3/SART3/FANCI/AAAS/ABI2/RPA1/SAFB2/HNRNPH1/HNRNPM/HNRNPU/ACTN4/PRC1/PCBP2/DHX9/TARDBP
DARS1	0.892038	1.38452	0.010291	2875	tags=33%, list=5%, signal=32%	SMPD4/IPO7/HNRNPU/DHX9/HNRNPA3/TARDBP/CD2AP/NCKAP1/SLC2A1/RPA1/IQGAP1/ANP32E/FANCI/NLN/RUFY1/SLC2A3/PCBP2/SART3/SPART/MYH10/NSUN2/SQSTM1/HNRNPM/MYL6/ABI2/LRPPRC/DBN1/OXSM
NSL1	0.882868	1.38429	0.0156017	1474	tags=12%, list=3%, signal=12%	DHX9/HNRNPU/SART3/AAAS/RPA1/ANP32E/IPO7/HNRNPA3/ATXN10/IPO4
PRRT2	0.868498	1.38425	0.0146158	2176	tags=12%, list=4%, signal=11%	SMPD4/FANCI/HNRNPH1/SART3/PRC1/ABI2/AAAS/NDUFA11/FLNA/INF2
HNRNPA2B1	0.93738	1.38425	0.000625991	1612	tags=23%, list=3%, signal=22%	DHX9/HNRNPA3/HNRNPU/SART3/HNRNPM/HNRNPH1/FANCI/SMPD4/TARDBP/GCN1/ABI2/SAFB2/AAAS/RAC1/RPA1/ANP32E/CHD4/CD2AP/CAPZB
TM6SF2	0.83824	1.38422	0.00999127	2962	tags=24%, list=5%, signal=23%	IQGAP1/HNRNPA3/SAFB2/GYS1/DHX9/PML/HNRNPM/DSTN/HNRNPU/SART3/WASF2/PPM1F/NLN/SLC2A1/SAMM50/GCN1/SQSTM1/IPO7/ARMC6/SLC2A3
OSBP2	0.861474	1.38419	0.00852631	3312	tags=21%, list=6%, signal=20%	HNRNPU/SMPD4/DHX9/DSTN/ACTG1/ABI2/ACTN4/SAFB2/RRP1/HNRNPA3/HNRNPM/ACTA1/RPA1/WASF2/SART3/MRPS17/SLC7A11/BOP1
TRMT61A	0.854241	1.38413	0.0172961	1049	tags=15%, list=2%, signal=15%	BOP1/MYL6/RRP1/ACTB/RPN1/ZHX2/SLC3A2/AAAS/CHD4/CAPZB/SLC7A11/SMPD4/IPO4
NCL	0.930564	1.38409	0.00331748	1769	tags=26%, list=3%, signal=25%	DHX9/HNRNPA3/HNRNPU/SART3/HNRNPM/LRPPRC/ZHX2/SMPD4/ABI2/RPA1/GCN1/NSUN2/TARDBP/ATXN10/INF2/IPO7/TLN1/SLC3A2/STRAP/AAAS/FLNA/SAFB2
PPIAP89	0.903766	1.38393	0.0184114	3134	tags=15%, list=6%, signal=15%	SLC2A1/AAAS/TARDBP/ANP32E/RAC1/FLNB/ABI2/WASF2/DSTN/STRAP/SPART/SLC7A11/PML
ZC3H3	0.850064	1.38392	0.0321429	3247	tags=21%, list=6%, signal=20%	BOP1/ZHX2/AAAS/HNRNPH1/ACTN4/RPA1/RAC1/ANP32E/RUFY1/PCBP2/DSTN/PRC1/LRPPRC/ARMC6/FLNB/CD2AP/ATXN10/CAPZB
SYNCRIP	0.900965	1.38383	0.0192324	1443	tags=18%, list=3%, signal=17%	HNRNPU/HNRNPA3/IPO7/SART3/HNRNPH1/DHX9/SMPD4/GCN1/HNRNPM/IQGAP1/FLNA/NCKAP1/PCBP2/MYH9/TARDBP
PGAP2	0.866827	1.38383	0.00823846	1968	tags=20%, list=4%, signal=20%	SMPD4/IPO7/ATXN10/LRPPRC/AAAS/RRP1/CD2AP/HNRNPU/PCBP2/ABI2/SAMM50/MRPS17/NSUN2/HNRNPH1/ACTN4/RPN1/DHX9
RPS6KA4	0.894797	1.38379	0.00553075	2718	tags=26%, list=5%, signal=25%	PPM1F/GCN1/ABI2/SART3/WASF2/PML/ACTB/SLC3A2/SMPD4/GYS1/ATXN10/RAC1/CYFIP1/IQGAP1/UBASH3B/TARDBP/TNKS1BP1/DSTN/STRAP/SQSTM1/IPO7/SAFB2
POLD2	0.818786	1.38378	0.0333495	4096	tags=23%, list=7%, signal=21%	AAAS/FANCI/RPN1/NDUFA10/TRIP6/PCBP2/MYL6/PRC1/SAFB2/RAC1/HNRNPM/ARMC6/MRPS17/INF2/WASF2/EPAS1/SLC2A1/TARDBP/ACTB
ACTG2	0.751253	1.38375	0.0346953	2634	tags=17%, list=5%, signal=16%	ACTA2/ACTC1/ACTG1/NDUFA11/DBN1/CAPZB/CHCHD3/SLC3A2/SART3/CD2AP/ABI2/HNRNPM/RUFY1/BOP1
COPS7A	0.828664	1.38373	0.030295	3051	tags=23%, list=6%, signal=21%	STRAP/ATXN10/RPA1/SAMM50/SART3/ZHX2/ACTN4/PPM1F/TLN1/HNRNPA3/MYH9/FLNA/SLC7A11/INF2/TRIP6/MYH10/RUFY1/NDUFA10/ACTBL2
DKC1	0.905615	1.38373	0.0155021	949	tags=17%, list=2%, signal=16%	SART3/HNRNPU/HNRNPM/DHX9/RPA1/HNRNPA3/LRPPRC/GCN1/ZHX2/SLC2A1/PCBP2/TARDBP/ACTB/SMPD4
TCAF1	0.821631	1.3837	0.0373108	2951	tags=23%, list=5%, signal=21%	ACTN4/MYH10/IPO7/NDUFS1/CHCHD3/DBN1/LRPPRC/HNRNPM/PPM1F/ATXN10/GTF2I/TLN1/RNH1/RPA1/NDUFA11/ACTB/OXSM/HNRNPU/SLC7A11
AC145098.1	0.896051	1.38359	0.00727604	1837	tags=14%, list=3%, signal=14%	IQGAP1/FLNA/ACTB/CHCHD3/SMPD4/HNRNPU/NSUN2/MYH10/GTF2I/TLN1/SLC2A1/RAC1
CYP51A1	0.90171	1.38351	0.0177776	1392	tags=11%, list=3%, signal=10%	GTF2I/CNOT1/DHX9/CHD4/CYFIP1/NDUFS1/ABI2/INF2/TLN1
ZNF429	0.825413	1.38345	0.0196497	4993	tags=15%, list=9%, signal=14%	GTF2I/TNKS1BP1/HNRNPH1/FLNB/DSTN/DBN1/CNOT1/HNRNPU/ACTN4/BOP1/ACTG2/ACTB/OXSM
AL139260.1	0.827255	1.38338	0.0329531	2672	tags=18%, list=5%, signal=17%	RNH1/SQSTM1/CAPZB/WASF2/PRDX1/FLNA/CNOT1/CD2AP/UBASH3B/NUBPL/CHCHD3/NDUFA11/CYFIP1/GYS1/SLC3A2
RUVBL1	0.908782	1.38334	0.00401214	1234	tags=18%, list=2%, signal=17%	HNRNPM/TARDBP/SMPD4/BRK1/DHX9/DBN1/RNH1/CAPZB/BOP1/PRDX1/WASF2/AAAS/SQSTM1/CHCHD3/ZHX2
JAGN1	0.830919	1.38326	0.0333495	3970	tags=27%, list=7%, signal=25%	BRK1/CHD4/RRP1/TARDBP/LRPPRC/RPN1/PCBP2/GTF2I/TNKS1BP1/AAAS/SAMM50/FLNB/ABI2/HNRNPA3/ANP32E/ACTB/DSTN/FLNA/PML/NUBPL/NDUFS1/PPM1F/MYL6
AC078942.1	0.872924	1.38322	0.0124868	1421	tags=8%, list=3%, signal=8%	GTF2I/CNOT1/INF2/BOP1/MYH10/ATXN10/PRDX1
TAF9	0.833353	1.38315	0.0311751	2499	tags=18%, list=5%, signal=17%	PCBP2/BRK1/HNRNPA3/HNRNPU/LRPPRC/CAPZB/RUFY1/FLNA/ACTG1/GCN1/SQSTM1/RAC1/OXSM/PML/MRPS17
BAG6	0.914235	1.38308	0.0167995	2081	tags=23%, list=4%, signal=22%	CD2AP/AAAS/DHX9/ATXN10/RPA1/HNRNPU/HNRNPA3/SAFB2/GCN1/HNRNPM/ACTB/BRK1/INF2/FANCI/CNOT1/BOP1/CHCHD3/SPART/FLNB
KRT8P36	0.844507	1.38301	0.02881	2368	tags=21%, list=4%, signal=21%	FLNA/GYS1/MYL6/UBASH3B/ACTB/HNRNPU/NCKAP1/ACTN4/TLN1/SLC7A11/RAC1/RPN1/TRIP6/HNRNPM/SPART/CD2AP/ARMC6/MYH9
SSR1	0.881193	1.383	0.0102046	2282	tags=19%, list=4%, signal=18%	CD2AP/HNRNPA3/HNRNPH1/SMPD4/ANP32E/DHX9/DSTN/HNRNPU/SART3/LRPPRC/SQSTM1/EPAS1/GCN1/SLC7A11/NLN/UBASH3B
LONP1	0.817558	1.3829	0.0368957	3246	tags=26%, list=6%, signal=25%	HNRNPM/MYL6/RNH1/RPN1/SLC3A2/TNKS1BP1/NDUFS2/GCN1/NDUFA11/SQSTM1/GTF2I/ACTBL2/CHCHD3/BRK1/ATXN10/NDUFS1/FLNB/PML/ACTA2/RRP1/GYS1/PDLIM1
SLC10A3	0.890536	1.38281	0.00528068	2395	tags=21%, list=4%, signal=21%	GYS1/RAC1/SART3/HNRNPM/FLNA/DHX9/TLN1/HNRNPU/HNRNPH1/WASF2/SMPD4/IPO4/INF2/DSTN/RPA1/RUFY1/HNRNPA3/TNKS1BP1
SPART-AS1	0.927866	1.3828	0.00355097	1297	tags=10%, list=2%, signal=9%	SPART/SAFB2/GCN1/SLC7A11/CYFIP1/IPO7/ACTA2/TARDBP
AL353751.1	0.922576	1.38279	0.0178585	1806	tags=8%, list=3%, signal=8%	CHD4/PML/NDUFA11/FANCI/TARDBP/DSTN/IPO4
USP4	0.814779	1.38279	0.0245351	3300	tags=31%, list=6%, signal=29%	CNOT1/NCKAP1/FANCI/NDUFS1/UBASH3B/SMPD4/HNRNPU/CYFIP1/LRPPRC/IPO7/MYH10/NLN/SART3/RAC1/GCN1/ARMC6/BRK1/TLN1/SLC2A3/GYS1/MRPS17/ABI2/BOP1/HNRNPM/FLNB/RRP1
B4GALT4	0.882282	1.38277	0.00518071	1231	tags=14%, list=2%, signal=14%	ABI2/HNRNPA3/FANCI/SART3/HNRNPH1/PCBP2/NCKAP1/ACTG1/EPAS1/TNKS1BP1/MYH9/RPA1
STOML2	0.857623	1.38273	0.0236361	2290	tags=21%, list=4%, signal=21%	HNRNPM/BRK1/PCBP2/TLN1/RNH1/FANCI/TARDBP/SLC7A11/ACTG2/MYH9/RRP1/NDUFC1/PPM1F/GYS1/STRAP/RAC1/IPO4/NDUFA10
CSTF3	0.874469	1.38271	0.0124395	1695	tags=24%, list=3%, signal=23%	HNRNPA3/HNRNPH1/HNRNPM/ANP32E/SMPD4/FANCI/GCN1/HNRNPU/ACTN4/NSUN2/SART3/ABI2/IPO7/DHX9/RNH1/TARDBP/RUFY1/CHCHD3/PRC1/AAAS
ANAPC1P2	0.828682	1.38264	0.018996	3809	tags=12%, list=7%, signal=11%	EPAS1/FLNB/GTF2I/TNKS1BP1/CNOT1/ACTN4/SAFB2/UBASH3B/RPN1/RPA1
THBS1	0.837105	1.38263	0.0167839	3092	tags=26%, list=6%, signal=25%	EPAS1/SPART/ZHX2/IQGAP1/FLNA/NLN/FANCI/DBN1/MYH9/NDUFC1/ACTA2/CHD4/ACTB/RUFY1/UBASH3B/SLC7A11/IPO4/AAAS/IPO7/INF2/NCKAP1/SAMM50
INO80C	0.830473	1.38257	0.0164777	2085	tags=13%, list=4%, signal=13%	FANCI/CHD4/TARDBP/AAAS/CYFIP1/SLC3A2/RAC1/FLNA/SLC7A11/ACTG2/BOP1
HPF1	0.841518	1.38255	0.0181258	2862	tags=17%, list=5%, signal=16%	PRDX1/NDUFC1/TARDBP/CAPZB/ANP32E/RNH1/SLC2A1/BRK1/HNRNPM/SART3/DSTN/NDUFS1/PDLIM1/ACTBL2
TSEN2	0.884922	1.38254	0.00483512	2083	tags=26%, list=4%, signal=25%	DHX9/TARDBP/AAAS/GCN1/HNRNPU/SLC7A11/CD2AP/LRPPRC/UBASH3B/NUBPL/OXSM/BRK1/SART3/SLC3A2/ZHX2/ARMC6/HNRNPH1/PML/HNRNPA3/CAPZB/NSUN2/PDLIM1
ITPRIP	0.867494	1.3825	0.0278107	2442	tags=13%, list=4%, signal=13%	SLC2A3/IQGAP1/SPART/ACTA2/PRDX1/RRP1/HNRNPU/CHCHD3/NDUFA11/SLC2A1/ACTBL2
BRD9	0.887977	1.38249	0.00317979	2257	tags=23%, list=4%, signal=22%	SMPD4/SART3/HNRNPH1/AAAS/GCN1/NSUN2/HNRNPM/DHX9/TARDBP/FANCI/SLC7A11/HNRNPU/IQGAP1/BOP1/RNH1/HNRNPA3/ATXN10/SLC3A2/RRP1
ZSCAN2	0.842354	1.38244	0.0134508	2199	tags=20%, list=4%, signal=19%	BRK1/SART3/GCN1/HNRNPU/HNRNPM/SAMM50/MRPS17/IPO4/PPM1F/ZHX2/RAC1/TARDBP/CHD4/PCBP2/SLC3A2/SPART/UBASH3B
SUMO2	0.902999	1.3824	0.00540986	826	tags=13%, list=1%, signal=13%	HNRNPA3/PCBP2/HNRNPU/SMPD4/DHX9/TARDBP/HNRNPM/FANCI/ACTG1/SART3/ANP32E
AL023806.3	0.798531	1.38229	0.02698	2040	tags=13%, list=4%, signal=13%	SQSTM1/NLN/PRDX1/CHD4/DHX9/TARDBP/NSUN2/SLC7A11/TLN1/NDUFA11/BOP1
NOC2L	0.88439	1.38207	0.0180006	2626	tags=24%, list=5%, signal=23%	CAPZB/PRDX1/WASF2/SQSTM1/CNOT1/RNH1/CHCHD3/SLC2A1/CYFIP1/RRP1/SLC7A11/GTF2I/GCN1/RAC1/ABI2/NDUFA10/SART3/FANCI/SLC3A2/NSUN2
PITRM1	0.837447	1.38204	0.0122439	4767	tags=31%, list=9%, signal=28%	DSTN/NCKAP1/DHX9/CNOT1/ACTN4/GTF2I/HNRNPU/NDUFA10/NDUFS2/LRPPRC/IQGAP1/PRDX1/IPO7/OXSM/EPAS1/CHCHD3/STRAP/ACTA1/RRP1/BOP1/AAAS/GYS1/RUFY1/RNH1/MYH10/NDUFC1
TOE1	0.878764	1.38195	0.0180698	2082	tags=17%, list=4%, signal=16%	SART3/HNRNPH1/HNRNPM/TARDBP/DHX9/PRC1/HNRNPA3/PRDX1/RNH1/ABI2/ARMC6/EPAS1/OXSM/ACTA2
FOXK2	0.873437	1.38195	0.0228788	1517	tags=23%, list=3%, signal=22%	FANCI/HNRNPA3/HNRNPH1/ANP32E/NSUN2/HNRNPM/SMPD4/ZHX2/TARDBP/SART3/RUFY1/PDLIM1/TNKS1BP1/DHX9/AAAS/GCN1/ARMC6/TLN1/PCBP2
GFM2	0.927294	1.38193	0.00211344	1827	tags=19%, list=3%, signal=18%	CNOT1/GTF2I/NDUFS1/DHX9/IPO7/MYH9/TNKS1BP1/LRPPRC/CYFIP1/CHD4/NLN/PRDX1/NCKAP1/SMPD4/NDUFS2/OXSM
EIF3C	0.892518	1.3819	0.0123116	2515	tags=20%, list=5%, signal=19%	CNOT1/ACTN4/NCKAP1/MYH9/CYFIP1/DHX9/GTF2I/IPO7/NLN/SQSTM1/NDUFS1/NSUN2/LRPPRC/PRDX1/SART3/RUFY1/TLN1
ISCU	0.807061	1.38181	0.0163864	5473	tags=30%, list=10%, signal=27%	RPA1/SART3/UBASH3B/GYS1/AAAS/NDUFC1/PRDX1/CAPZB/PDLIM1/OXSM/RUFY1/DSTN/RPN1/MRPS17/CHCHD3/BRK1/ACTA2/HNRNPH1/HNRNPM/SLC2A1/NDUFS2/TLN1/DHX9/ACTG2/PCBP2
HSPA14	0.891056	1.38175	0.0114135	1733	tags=15%, list=3%, signal=15%	FANCI/PCBP2/SMPD4/HNRNPA3/TARDBP/DHX9/HNRNPU/HNRNPM/BRK1/STRAP/PRC1/ANP32E/ATXN10
PSMA5	0.854286	1.38172	0.0164375	2677	tags=20%, list=5%, signal=19%	PRDX1/TARDBP/CAPZB/RAC1/BRK1/RNH1/SQSTM1/SLC3A2/OXSM/WASF2/UBASH3B/NDUFC1/NDUFA11/SPART/NDUFS2/NSUN2/NLN
PARD6B	0.870973	1.38155	0.00549915	1964	tags=17%, list=4%, signal=16%	SART3/CD2AP/SMPD4/LRPPRC/RAC1/HNRNPH1/INF2/HNRNPU/NCKAP1/TLN1/DSTN/HNRNPA3/IPO7/TARDBP
FLII	0.86443	1.38152	0.00771068	1681	tags=21%, list=3%, signal=21%	SART3/MYH9/DHX9/NCKAP1/CYFIP1/RPA1/ACTB/TLN1/PML/FLNA/GCN1/LRPPRC/ATXN10/GYS1/HNRNPU/NDUFS1/DSTN/PRDX1
WDFY2	0.835897	1.38122	0.0203952	3152	tags=20%, list=6%, signal=19%	HNRNPA3/IPO7/TLN1/GCN1/RNH1/DHX9/UBASH3B/IQGAP1/NDUFS1/SART3/HNRNPM/SMPD4/NDUFS2/RPA1/SLC7A11/SLC2A3/SPART
RN7SL40P	0.768706	1.38115	0.0131723	743	tags=8%, list=1%, signal=8%	FLNA/IPO7/RPN1/MYL6/MRPS17/CHCHD3/SLC2A1
LINC02828	0.835853	1.38108	0.0193378	1920	tags=13%, list=3%, signal=13%	ACTB/CYFIP1/TARDBP/CHCHD3/PPM1F/OXSM/ACTA1/NDUFA11/CHD4/ACTA2/NDUFA10
SUPV3L1	0.831948	1.38108	0.0316995	2884	tags=18%, list=5%, signal=17%	GCN1/SART3/HNRNPU/RPA1/TARDBP/PCBP2/BRK1/DHX9/ACTB/PDLIM1/PPM1F/EPAS1/CHD4/NDUFS2/RPN1
JPT2	0.841039	1.38106	0.0183047	2984	tags=24%, list=5%, signal=23%	WASF2/SMPD4/HNRNPM/TARDBP/GCN1/MYH9/FANCI/DBN1/HNRNPU/IQGAP1/MYL6/RNH1/CAPZB/RPA1/RRP1/SART3/CHCHD3/ACTN4/STRAP/NLN
RBM27	0.881828	1.38105	0.0224372	2027	tags=19%, list=4%, signal=18%	HNRNPH1/IPO7/SART3/HNRNPU/ANP32E/HNRNPM/DHX9/CD2AP/ACTN4/PCBP2/NCKAP1/HNRNPA3/GTF2I/PPM1F/MYH10/ARMC6
NGDN	0.876433	1.38104	0.0206705	2871	tags=20%, list=5%, signal=19%	DHX9/AAAS/HNRNPA3/PCBP2/HNRNPM/SMPD4/HNRNPU/IPO4/BRK1/RNH1/ZHX2/EPAS1/ANP32E/TARDBP/SAFB2/NDUFA10/HNRNPH1
DDOST	0.873295	1.381	0.0124956	1789	tags=23%, list=3%, signal=22%	CAPZB/SART3/HNRNPA3/PRDX1/RPN1/BRK1/WASF2/SAFB2/FANCI/MYH9/NLN/RNH1/PPM1F/INF2/RUFY1/HNRNPM/SLC2A1/SQSTM1/DHX9
DHFR2	0.851801	1.38099	0.0152247	3669	tags=27%, list=7%, signal=26%	CNOT1/NCKAP1/CYFIP1/MYH9/GTF2I/GYS1/ATXN10/SAFB2/TNKS1BP1/IPO4/EPAS1/HNRNPH1/PCBP2/NLN/HNRNPM/TLN1/DSTN/ACTN4/MRPS17/ACTA2/RAC1/PPM1F/NUBPL
SPOP	0.889168	1.38099	0.00685377	2095	tags=21%, list=4%, signal=21%	SART3/DHX9/SMPD4/TARDBP/FANCI/AAAS/ABI2/RPA1/ATXN10/ACTN4/NCKAP1/PCBP2/SAFB2/HNRNPH1/BRK1/GYS1/TLN1/CYFIP1
TMCO1	0.870792	1.38094	0.0223764	1837	tags=12%, list=3%, signal=12%	ANP32E/NDUFS2/DHX9/CD2AP/RPN1/MYH10/SMPD4/ATXN10/NCKAP1/MRPS17
NARS2	0.850287	1.38084	0.0171196	3216	tags=24%, list=6%, signal=22%	GTF2I/IPO7/ZHX2/NUBPL/DHX9/LRPPRC/NCKAP1/OXSM/SAMM50/GYS1/STRAP/CHCHD3/RPA1/NDUFA11/RNH1/NSUN2/NDUFC1/MRPS17/PCBP2/SPART
AC073320.1	0.826495	1.38077	0.0166347	4270	tags=24%, list=8%, signal=22%	SAFB2/ABI2/HNRNPA3/HNRNPU/FANCI/SART3/CHCHD3/RAC1/NDUFA11/CD2AP/CNOT1/TNKS1BP1/IQGAP1/NLN/SLC2A3/STRAP/UBASH3B/MYH9/ANP32E/MYH10
DCLRE1C	0.898694	1.38075	0.00186864	2404	tags=19%, list=4%, signal=18%	HNRNPA3/HNRNPU/SMPD4/FANCI/ABI2/RPA1/PRC1/TRIP6/SART3/LRPPRC/ACTBL2/ACTB/ATXN10/BRK1/NDUFA11/TARDBP
VSIG10L	0.809694	1.38073	0.0384123	4050	tags=24%, list=7%, signal=22%	SQSTM1/NLN/BOP1/INF2/NUBPL/SLC7A11/ACTG1/MRPS17/PDLIM1/UBASH3B/PPM1F/MYL6/HNRNPM/ACTG2/FANCI/MYH10/GTF2I/IPO4/ZHX2/SLC2A1
UNG	0.882808	1.38068	0.0100471	1754	tags=17%, list=3%, signal=16%	SART3/SMPD4/DHX9/AAAS/GCN1/HNRNPM/SAFB2/FANCI/RPA1/RRP1/PCBP2/SLC7A11/STRAP/HNRNPU
AKR1E2	0.86343	1.38034	0.0223123	2428	tags=15%, list=4%, signal=15%	IQGAP1/PCBP2/PRDX1/GYS1/MRPS17/ACTA2/FLNA/SPART/DSTN/ACTN4/FLNB/WASF2/HNRNPU
ATP5MGP6	0.968937	1.38023	0.0144579	1714	tags=6%, list=3%, signal=6%	CD2AP/ACTN4/NDUFA10/MYH10/ACTA1
AC002398.1	0.832587	1.3802	0.0208713	3129	tags=19%, list=6%, signal=18%	TARDBP/ABI2/PCBP2/DBN1/ANP32E/CHD4/AAAS/INF2/RAC1/RRP1/ATXN10/MYH9/RPN1/MYL6/RUFY1/LRPPRC
UBE2R2	0.887592	1.38017	0.0102275	1212	tags=21%, list=2%, signal=21%	HNRNPM/SART3/TARDBP/RPA1/TLN1/SAFB2/PCBP2/DHX9/RPN1/GCN1/BRK1/RAC1/SQSTM1/AAAS/CYFIP1/HNRNPU/NDUFS1/PRC1
AC138701.1	0.923348	1.38015	0.00698616	2886	tags=15%, list=5%, signal=15%	ACTG2/PCBP2/TNKS1BP1/TLN1/PRDX1/ATXN10/SLC3A2/RAC1/STRAP/IQGAP1/LRPPRC/NDUFS1/NDUFA11
PUS7	0.904485	1.38015	0.0161001	1625	tags=19%, list=3%, signal=19%	IPO7/DHX9/LRPPRC/GCN1/BOP1/NCKAP1/GTF2I/HNRNPM/TARDBP/SMPD4/IPO4/ATXN10/MRPS17/ZHX2/MYH9/SPART
MARCHF9	0.78828	1.38012	0.0247382	2525	tags=20%, list=5%, signal=19%	ABI2/MYL6/HNRNPM/AAAS/ATXN10/CNOT1/BRK1/RPA1/PCBP2/NDUFS2/NDUFC1/HNRNPH1/HNRNPU/TRIP6/TLN1/DBN1/RRP1
RNU6-501P	0.999364	1.38008	0.0229192	37	tags=2%, list=0%, signal=2%	ACTBL2/RPA1
SEPTIN11	0.864957	1.38006	0.0126945	2154	tags=17%, list=4%, signal=16%	NCKAP1/GTF2I/CNOT1/ABI2/TLN1/IQGAP1/ACTC1/AAAS/ACTA1/ACTN4/FLNB/FLNA/PML/CYFIP1
HSF2BP	0.870144	1.38004	0.00476833	3559	tags=30%, list=6%, signal=28%	ABI2/HNRNPA3/HNRNPU/CD2AP/RPA1/SMPD4/LRPPRC/FANCI/ACTG1/IPO7/IQGAP1/PRC1/SART3/ACTB/ATXN10/RAC1/ACTA1/NCKAP1/HNRNPM/PRDX1/NLN/ACTBL2/TARDBP/ACTN4/IPO4
BABAM1	0.888868	1.37986	0.0218111	445	tags=8%, list=1%, signal=8%	MYL6/CHD4/NDUFA11/RRP1/BRK1/PPM1F/NDUFC1
PDE4D	0.885	1.37984	0.015069	3326	tags=19%, list=6%, signal=18%	IQGAP1/SLC2A3/UBASH3B/EPAS1/NLN/ACTN4/CHD4/SLC7A11/WASF2/BRK1/ACTG1/TARDBP/TLN1/SLC2A1/MYL6/STRAP
HAUS8	0.889677	1.37984	0.00618898	1351	tags=18%, list=2%, signal=17%	FANCI/SAFB2/HNRNPA3/AAAS/CAPZB/HNRNPM/RPA1/CHD4/PML/RAC1/MYL6/HNRNPU/PRC1/ACTG1/NUBPL
COPS7B	0.917263	1.37983	0.00186714	1826	tags=21%, list=3%, signal=21%	HNRNPA3/SAFB2/HNRNPU/GYS1/PCBP2/SMPD4/NDUFA10/SART3/RAC1/AAAS/ABI2/GCN1/RPA1/PML/ZHX2/PPM1F/HNRNPM/MRPS17
AL683842.1	0.831714	1.37979	0.0153082	1315	tags=8%, list=2%, signal=8%	GTF2I/IPO7/CNOT1/SPART/MYH10/SLC2A3/PDLIM1
AL109618.1	0.895077	1.37978	0.0170053	2006	tags=18%, list=4%, signal=17%	CAPZB/DHX9/WASF2/HNRNPM/HNRNPA3/ANP32E/MYH9/TARDBP/GTF2I/ACTN4/CYFIP1/FANCI/FLNB/HNRNPH1/PRDX1
YWHAE	0.8612	1.37976	0.0349243	2215	tags=18%, list=4%, signal=17%	TARDBP/AAAS/RPA1/ACTG1/DHX9/STRAP/PCBP2/OXSM/SART3/ABI2/HNRNPM/NDUFA10/GYS1/ACTC1/MYL6
RNF115	0.859019	1.37972	0.0114751	2143	tags=25%, list=4%, signal=24%	NCKAP1/RPA1/ANP32E/DHX9/FANCI/DSTN/ACTB/HNRNPA3/SAFB2/MYH10/SART3/FLNA/ACTN4/CHD4/PCBP2/RAC1/NUBPL/IQGAP1/RUFY1/TRIP6/GCN1
PRMT3	0.922321	1.37969	0.00205089	2069	tags=18%, list=4%, signal=17%	DHX9/NCKAP1/HNRNPA3/SART3/IPO7/SMPD4/HNRNPU/MYH9/GCN1/FANCI/ACTN4/CD2AP/SQSTM1/ACTG2/ANP32E
CAPN2	0.831264	1.37965	0.0277425	2145	tags=20%, list=4%, signal=19%	IQGAP1/CYFIP1/INF2/HNRNPM/UBASH3B/MYH9/NDUFS2/HNRNPU/PRDX1/SQSTM1/DSTN/BOP1/FLNA/NCKAP1/PDLIM1/SPART/ACTB
KMT5A	0.89727	1.37964	0.0060387	4182	tags=36%, list=8%, signal=33%	SART3/GCN1/TARDBP/FANCI/HNRNPM/HNRNPU/SLC3A2/SLC7A11/TLN1/UBASH3B/AAAS/NCKAP1/SMPD4/MYH10/NSUN2/TNKS1BP1/OXSM/CHD4/RAC1/EPAS1/CNOT1/SQSTM1/WASF2/INF2/GYS1/NUBPL/RPA1/TRIP6/NDUFS1/MRPS17
AC083799.1	0.821426	1.37962	0.0129817	3428	tags=19%, list=6%, signal=18%	HNRNPU/HNRNPA3/TARDBP/PCBP2/HNRNPM/ACTB/NDUFS2/NUBPL/ANP32E/NSUN2/RRP1/FANCI/MYH9/SAFB2/IPO4/NCKAP1
LINC01902	0.857347	1.37955	0.0169865	2776	tags=13%, list=5%, signal=12%	CHD4/STRAP/PCBP2/NDUFC1/MRPS17/ACTG1/FANCI/HNRNPM/ARMC6/NDUFS2/RPN1
PDCD6-AHRR	0.9992	1.3795	0.0453721	45	tags=1%, list=0%, signal=1%	ACTN4
ZCRB1	0.87099	1.37932	0.00526872	3375	tags=31%, list=6%, signal=29%	HNRNPU/HNRNPA3/AAAS/TARDBP/FANCI/HNRNPM/NCKAP1/PCBP2/SART3/EPAS1/CAPZB/RNH1/NDUFS2/ANP32E/NUBPL/NLN/ACTA1/CYFIP1/ZHX2/SLC2A1/ACTA2/DSTN/RUFY1/CHCHD3/CD2AP/ACTB
MXRA7P1	0.814559	1.37922	0.0396611	2572	tags=15%, list=5%, signal=15%	IPO7/GTF2I/CYFIP1/DHX9/NCKAP1/STRAP/IQGAP1/MYH9/WASF2/SART3/ACTN4/ANP32E/CHCHD3
RARA	0.812847	1.37913	0.04358	2873	tags=17%, list=5%, signal=16%	SART3/SAFB2/HNRNPU/BOP1/ACTN4/HNRNPM/MYH10/PCBP2/SMPD4/ARMC6/MRPS17/ATXN10/FLNB/PML
AL022097.1	0.942865	1.37881	0.0484429	62	tags=2%, list=0%, signal=2%	AAAS/ARMC6
HSP90AB2P	0.828076	1.37873	0.034009	3960	tags=25%, list=7%, signal=23%	DHX9/FLNB/CNOT1/GTF2I/RPA1/CYFIP1/IPO7/HNRNPU/SAMM50/RUFY1/TLN1/STRAP/MYH9/GYS1/ACTA2/RNH1/SQSTM1/NCKAP1/RAC1/PRDX1/NSUN2
LNCSRLR	0.791311	1.37869	0.027546	5232	tags=26%, list=9%, signal=24%	WASF2/RPN1/FLNB/MRPS17/SQSTM1/UBASH3B/TRIP6/SLC2A1/TARDBP/RNH1/BOP1/TNKS1BP1/CD2AP/ACTG1/HNRNPU/RRP1/MYL6/ACTC1/NDUFS2/MYH9/SLC2A3/GTF2I
JARID2	0.911728	1.37863	0.00255487	1265	tags=15%, list=2%, signal=15%	HNRNPA3/DHX9/SART3/SMPD4/HNRNPU/CD2AP/RPA1/ABI2/HNRNPM/ANP32E/IPO7/TLN1/GYS1
AC092687.3	0.7725	1.37862	0.0393185	3545	tags=18%, list=6%, signal=17%	MYL6/SAFB2/SART3/TNKS1BP1/NDUFA11/HNRNPM/BOP1/ACTG1/SLC3A2/ARMC6/SQSTM1/TRIP6/GYS1/RPN1/ACTB
WBP1LP2	0.778849	1.37859	0.0354707	3708	tags=15%, list=7%, signal=14%	RAC1/RNH1/TLN1/CHD4/RUFY1/TRIP6/PPM1F/CAPZB/AAAS/IPO7/SAFB2/NCKAP1/OXSM
NECAP2	0.897326	1.37855	0.00961171	1707	tags=18%, list=3%, signal=17%	CAPZB/WASF2/TARDBP/PML/RNH1/RPA1/ACTN4/ACTG1/INF2/SLC2A1/GYS1/HNRNPM/CNOT1/CD2AP/PRDX1
HCN2	0.79359	1.37854	0.037196	3599	tags=15%, list=7%, signal=14%	BRK1/GTF2I/RRP1/SPART/ABI2/PCBP2/GYS1/BOP1/SLC2A1/SQSTM1/ZHX2/NDUFA11/IPO4
PIAS2	0.874928	1.37851	0.0103209	2344	tags=20%, list=4%, signal=19%	ABI2/HNRNPU/HNRNPH1/GCN1/PCBP2/SART3/TRIP6/TARDBP/STRAP/ANP32E/CYFIP1/DHX9/ACTA1/DBN1/BRK1/GYS1/MYL6
ZNF664	0.917881	1.37851	0.00243435	1690	tags=20%, list=3%, signal=20%	SART3/HNRNPU/NCKAP1/GCN1/SMPD4/ABI2/ANP32E/PRC1/ACTN4/EPAS1/ACTG1/LRPPRC/DHX9/RPA1/CNOT1/TLN1/CHCHD3
RPP38	0.844546	1.37843	0.0138622	3382	tags=36%, list=6%, signal=34%	MYL6/BRK1/RAC1/MRPS17/IPO4/PCBP2/ABI2/RRP1/TARDBP/NDUFA10/AAAS/STRAP/ACTG2/NDUFA11/SLC2A3/CAPZB/HNRNPA3/SQSTM1/PRDX1/GTF2I/NSUN2/SLC3A2/NDUFS2/FANCI/DHX9/MYH10/OXSM/PDLIM1/SLC7A11/ATXN10
SNRNP48	0.885267	1.37834	0.00990177	2166	tags=20%, list=4%, signal=19%	DHX9/CD2AP/HNRNPU/NCKAP1/ANP32E/SART3/PRDX1/CHCHD3/TLN1/IPO7/SLC3A2/NDUFS2/NDUFA10/FLNA/RPA1/FLNB/NUBPL
BUD13	0.910155	1.37833	0.00240831	3093	tags=30%, list=6%, signal=28%	HNRNPM/DHX9/SMPD4/AAAS/MYL6/ABI2/HNRNPU/FANCI/ANP32E/HNRNPA3/SART3/RPA1/ACTN4/PCBP2/IPO7/RUFY1/PRC1/GCN1/SPART/RAC1/TARDBP/ARMC6/BRK1/PDLIM1/OXSM
SNX5	0.882284	1.37824	0.0147277	1497	tags=15%, list=3%, signal=15%	HNRNPA3/SMPD4/SART3/ABI2/DHX9/LRPPRC/HNRNPM/RUFY1/TARDBP/RAC1/FANCI/PCBP2/INF2
NT5C3A	0.845668	1.3782	0.0172153	2571	tags=21%, list=5%, signal=20%	GYS1/SLC2A1/HNRNPU/IQGAP1/DSTN/RPA1/HNRNPA3/RUFY1/HNRNPM/CHCHD3/ACTA1/ACTN4/SMPD4/ABI2/ANP32E/SAFB2/FANCI/IPO7
AC060780.1	0.914867	1.37814	0.00260017	1931	tags=12%, list=4%, signal=12%	SMPD4/HNRNPH1/DHX9/PCBP2/NCKAP1/SAFB2/FLNB/CAPZB/IPO7/LRPPRC
ACACA	0.822581	1.37806	0.0258188	1974	tags=15%, list=4%, signal=15%	SMPD4/GCN1/HNRNPU/IPO7/CD2AP/LRPPRC/SART3/DHX9/FLNB/NLN/RPA1/OXSM/GYS1
PDIA3	0.806228	1.37804	0.0469886	4098	tags=26%, list=7%, signal=24%	RPN1/FANCI/ABI2/IQGAP1/CYFIP1/PRC1/FLNB/ACTB/MYH10/SAFB2/STRAP/PML/RNH1/ACTG2/NCKAP1/UBASH3B/ZHX2/HNRNPU/PDLIM1/HNRNPM/EPAS1/ATXN10
NFYC	0.879085	1.37804	0.0158649	2418	tags=24%, list=4%, signal=23%	HNRNPU/CAPZB/SART3/ANP32E/RUFY1/PRDX1/TARDBP/NSUN2/HNRNPA3/NDUFS2/DHX9/GCN1/RAC1/NLN/HNRNPH1/NDUFA11/RNH1/WASF2/CHD4/PML
AL137786.1	0.848511	1.37795	0.0127843	2049	tags=11%, list=4%, signal=10%	FLNA/IQGAP1/SART3/DSTN/RUFY1/SPART/STRAP/CHD4/NDUFC1
PSMD14	0.867754	1.37794	0.00684031	2449	tags=25%, list=4%, signal=24%	CHCHD3/NCKAP1/PRDX1/DHX9/STRAP/HNRNPU/ACTG1/SQSTM1/SLC7A11/ACTB/WASF2/SLC2A1/UBASH3B/NUBPL/NDUFC1/RNH1/NDUFS1/ACTA1/NDUFS2/ACTG2/HNRNPH1
TBC1D22B	0.908291	1.37794	0.00244879	1686	tags=15%, list=3%, signal=15%	CD2AP/SMPD4/HNRNPA3/HNRNPU/ANP32E/SAFB2/SART3/DSTN/RAC1/GYS1/RUFY1/RPA1/FANCI
BCCIP	0.841426	1.37793	0.0291036	2187	tags=20%, list=4%, signal=19%	HNRNPU/ATXN10/PCBP2/AAAS/DHX9/SMPD4/CD2AP/HNRNPA3/HNRNPM/SAMM50/LRPPRC/MYH9/ACTG1/ARMC6/HNRNPH1/DSTN/MYH10
DALRD3	0.865708	1.3778	0.00346417	4139	tags=37%, list=8%, signal=34%	CAPZB/HNRNPM/HNRNPU/DHX9/CNOT1/SART3/CYFIP1/SLC2A1/GTF2I/WASF2/RNH1/AAAS/SQSTM1/IPO7/SMPD4/PPM1F/FLNB/CHCHD3/SAMM50/NLN/ATXN10/RPA1/PCBP2/NDUFS1/EPAS1/INF2/LRPPRC/RPN1/NDUFA10/MYH10/PDLIM1
E2F4	0.91152	1.37778	0.00113505	3051	tags=29%, list=6%, signal=27%	SMPD4/GYS1/HNRNPU/HNRNPA3/SART3/HNRNPM/PCBP2/UBASH3B/CAPZB/AAAS/RAC1/NCKAP1/CHCHD3/TRIP6/DHX9/ABI2/LRPPRC/NDUFS2/STRAP/NDUFS1/CHD4/SLC2A1/FLNA/TARDBP
ATPAF1	0.810777	1.37778	0.0229467	3070	tags=21%, list=6%, signal=20%	PRDX1/NDUFS1/NUBPL/OXSM/TARDBP/HNRNPA3/SQSTM1/TRIP6/ATXN10/ZHX2/ACTN4/HNRNPU/SPART/RPN1/WASF2/CAPZB/LRPPRC/IPO4
TCOF1	0.903497	1.3777	0.00409014	2163	tags=29%, list=4%, signal=27%	SMPD4/AAAS/FANCI/DHX9/HNRNPU/IPO7/LRPPRC/ZHX2/HNRNPA3/HNRNPM/GCN1/PCBP2/PRC1/IPO4/BOP1/RPA1/NLN/RUFY1/SAFB2/WASF2/DBN1/SART3/TARDBP/CNOT1
AC087821.1	0.839482	1.37768	0.04368	1753	tags=8%, list=3%, signal=8%	FLNA/SQSTM1/ARMC6/SMPD4/CAPZB/BOP1/NDUFA11
ZC3HAV1L	0.897809	1.37759	0.00273141	2213	tags=19%, list=4%, signal=18%	GYS1/ABI2/ACTG1/DBN1/DHX9/FLNA/EPAS1/HNRNPA3/LRPPRC/GCN1/IQGAP1/IPO7/HNRNPU/PRDX1/RPA1/CD2AP
NDUFA9	0.873275	1.37757	0.0222282	888	tags=8%, list=2%, signal=8%	CHD4/MYL6/CNOT1/NDUFA11/RRP1/RPA1/EPAS1
HIKESHI	0.826934	1.37746	0.0178061	4009	tags=18%, list=7%, signal=17%	BRK1/ATXN10/CAPZB/HNRNPM/PRC1/NDUFC1/NDUFA10/CHD4/NDUFS2/SPART/RUFY1/ABI2/NCKAP1/TNKS1BP1/TRIP6
SNW1	0.915665	1.37739	0.00148535	1676	tags=30%, list=3%, signal=29%	DHX9/PCBP2/ATXN10/SART3/HNRNPH1/HNRNPA3/ANP32E/AAAS/HNRNPU/RNH1/SAFB2/MYH9/ACTA2/IPO7/RPN1/ARMC6/FANCI/RUFY1/RPA1/LRPPRC/HNRNPM/SLC7A11/STRAP/CYFIP1/IPO4
UBE2J2	0.88227	1.37736	0.0221297	2386	tags=25%, list=4%, signal=24%	TARDBP/AAAS/GYS1/RPN1/CAPZB/RNH1/SART3/RAC1/ANP32E/HNRNPM/FANCI/CHD4/CNOT1/TNKS1BP1/BRK1/ABI2/RUFY1/INF2/WASF2/NDUFA10/ARMC6
SUFU	0.876532	1.37725	0.0237124	1344	tags=15%, list=2%, signal=15%	RPA1/SART3/TNKS1BP1/ACTN4/DHX9/NCKAP1/MYH9/PPM1F/CYFIP1/HNRNPU/PDLIM1/ATXN10/HNRNPM
SLC39A14	0.841959	1.37724	0.031472	3960	tags=27%, list=7%, signal=25%	GTF2I/EPAS1/NDUFS1/NDUFA11/CHD4/ACTG1/NDUFS2/IPO4/MYH10/SAFB2/GYS1/RPA1/MYL6/CNOT1/RAC1/FLNB/PML/BOP1/AAAS/SLC2A1/DSTN/PCBP2/ATXN10
ENDOD1	0.878801	1.37722	0.0109735	2687	tags=18%, list=5%, signal=17%	FLNA/UBASH3B/IQGAP1/INF2/DSTN/ACTA2/SPART/DBN1/PRDX1/CD2AP/SART3/CYFIP1/SLC2A3/NDUFA10/ACTG2
AKR7A2	0.832116	1.37709	0.044159	2647	tags=19%, list=5%, signal=18%	RNH1/DBN1/CAPZB/FLNA/CHD4/NDUFS2/BRK1/SLC7A11/NUBPL/PRDX1/RAC1/AAAS/CHCHD3/RPN1/SQSTM1/IQGAP1
PA2G4P1	0.846987	1.37707	0.0462687	2767	tags=13%, list=5%, signal=12%	EPAS1/WASF2/HNRNPM/NDUFS1/SPART/RPN1/NSUN2/TARDBP/ATXN10/CD2AP/MYH10
GYG1	0.901611	1.37701	0.00153388	2470	tags=26%, list=4%, signal=25%	TARDBP/DBN1/ACTB/ACTG1/UBASH3B/HNRNPM/WASF2/IQGAP1/RAC1/BOP1/RNH1/PRDX1/CYFIP1/RPA1/SART3/CAPZB/ACTN4/CHD4/ABI2/IPO7/RPN1/DHX9
RNF114	0.849383	1.37698	0.0184355	2936	tags=20%, list=5%, signal=19%	SMPD4/HNRNPU/SART3/GYS1/ANP32E/HNRNPH1/GCN1/TARDBP/ACTN4/HNRNPA3/HNRNPM/CHD4/MYL6/PPM1F/TRIP6/RNH1/FLNB
GTF2F1	0.879875	1.37693	0.0311121	2448	tags=20%, list=4%, signal=19%	SAFB2/RPA1/DHX9/SMPD4/HNRNPM/RUFY1/NDUFA11/HNRNPU/GYS1/AAAS/PCBP2/RRP1/RNH1/FLNA/INF2/ABI2/BRK1
RALGPS2	0.859754	1.37689	0.0177576	2797	tags=20%, list=5%, signal=19%	DHX9/HNRNPU/GTF2I/SART3/CD2AP/NDUFC1/HNRNPA3/ZHX2/MYH10/ACTN4/RNH1/FLNB/SMPD4/INF2/PDLIM1/ATXN10/LRPPRC
LINC01948	0.855712	1.37682	0.0216734	2228	tags=13%, list=4%, signal=13%	UBASH3B/SQSTM1/RRP1/CAPZB/RPN1/PPM1F/STRAP/MYH10/DSTN/NDUFA10/BOP1
AL158167.1	0.805288	1.37674	0.0456531	2258	tags=14%, list=4%, signal=14%	FANCI/AAAS/DHX9/SLC2A1/STRAP/RAC1/TARDBP/ACTN4/MRPS17/PDLIM1/CAPZB/DSTN
FTLP5	0.785512	1.37667	0.0469897	1658	tags=11%, list=3%, signal=10%	PRDX1/NLN/BOP1/SLC7A11/CAPZB/SLC2A3/ZHX2/SPART/PPM1F
FBXL12	0.891256	1.37664	0.0104627	2654	tags=23%, list=5%, signal=22%	SMPD4/SART3/HNRNPM/DHX9/MYH9/GCN1/HNRNPA3/RPA1/SAFB2/AAAS/PCBP2/DBN1/ACTA1/RPN1/NDUFS2/MRPS17/GYS1/ANP32E/PML
GATD3B	0.726322	1.37661	0.0349266	5859	tags=24%, list=11%, signal=21%	CYFIP1/SLC7A11/UBASH3B/PPM1F/ZHX2/SAMM50/IPO4/NDUFS2/NCKAP1/IPO7/LRPPRC/ACTA1/RPN1/PCBP2/WASF2/DHX9/RRP1/FLNB/BOP1/NUBPL
ZNF266	0.849847	1.37659	0.0185979	2510	tags=18%, list=5%, signal=17%	HNRNPH1/ABI2/HNRNPA3/SAFB2/GYS1/AAAS/HNRNPM/PML/DSTN/PDLIM1/ACTN4/SLC3A2/SMPD4/NDUFS1/IPO7
COMMD1	0.816513	1.37657	0.0410448	2026	tags=13%, list=4%, signal=13%	MYL6/BRK1/NDUFA10/RAC1/RNH1/FANCI/TRIP6/RPA1/CAPZB/SAMM50/DHX9
MOV10	0.815452	1.37648	0.0226268	2500	tags=21%, list=5%, signal=20%	GCN1/SMPD4/TARDBP/RRP1/DHX9/WASF2/HNRNPU/HNRNPA3/GYS1/STRAP/NDUFA10/HNRNPM/FLNA/ARMC6/AAAS/RPA1/FANCI/ABI2
POLR2D	0.905932	1.37641	0.00700141	1688	tags=14%, list=3%, signal=14%	SMPD4/HNRNPA3/FANCI/DHX9/HNRNPU/GCN1/LRPPRC/SART3/TARDBP/PRDX1/AAAS/HNRNPM
LARS1	0.878387	1.37636	0.00453781	2320	tags=27%, list=4%, signal=26%	HNRNPU/DHX9/LRPPRC/IPO7/CD2AP/HNRNPH1/CYFIP1/SART3/NLN/WASF2/HNRNPM/NDUFS2/RUFY1/MYH10/SQSTM1/ACTB/GCN1/NDUFC1/ARMC6/ATXN10/HNRNPA3/PDLIM1/CHCHD3
AC084824.1	0.869355	1.37635	0.00659924	3058	tags=24%, list=6%, signal=23%	HNRNPH1/HNRNPU/HNRNPM/SART3/SAFB2/RPA1/FANCI/GYS1/PRDX1/SMPD4/GCN1/ABI2/ACTN4/DHX9/NDUFC1/IPO7/MRPS17/HNRNPA3/ACTB/PRC1
ACYP1	0.867329	1.37625	0.0106739	2487	tags=19%, list=5%, signal=18%	FANCI/ABI2/HNRNPM/TARDBP/AAAS/UBASH3B/PRC1/CHD4/HNRNPA3/FLNA/DSTN/HNRNPU/DBN1/SAFB2/OXSM/INF2
ILF2	0.927758	1.37618	0.00251955	2116	tags=29%, list=4%, signal=28%	HNRNPU/DHX9/HNRNPM/SART3/ATXN10/HNRNPA3/AAAS/RRP1/BRK1/FANCI/NDUFS2/RPA1/RUFY1/ACTN4/LRPPRC/SPART/ABI2/CHD4/STRAP/PDLIM1/PRDX1/TARDBP/DBN1/ANP32E
DNAJB11	0.818334	1.37611	0.0230615	2254	tags=17%, list=4%, signal=16%	RPN1/HNRNPA3/RUFY1/WASF2/HNRNPM/ACTG1/SAFB2/CHCHD3/GCN1/SLC2A3/CHD4/INF2/IPO4/FANCI
SF3B3	0.902505	1.3761	0.014072	1256	tags=20%, list=2%, signal=20%	CNOT1/HNRNPM/DHX9/ACTN4/SART3/SMPD4/CYFIP1/HNRNPU/RPA1/WASF2/MYH10/BRK1/CAPZB/ATXN10/SQSTM1/PRDX1/ACTG1
CIZ1	0.906941	1.37594	0.0106168	2075	tags=26%, list=4%, signal=25%	DHX9/HNRNPU/SART3/RPA1/ANP32E/TARDBP/AAAS/SAFB2/CAPZB/WASF2/HNRNPM/SMPD4/HNRNPA3/FANCI/GCN1/PPM1F/LRPPRC/IPO7/SLC2A3/NSUN2/SAMM50/RUFY1
PYCR3	0.832927	1.37575	0.0479798	3327	tags=14%, list=6%, signal=13%	BOP1/PPM1F/OXSM/ACTN4/SPART/DHX9/IPO4/NDUFA11/NDUFS2/ACTB/NLN/NDUFS1
U2AF1L4	0.849664	1.37573	0.0297905	3343	tags=24%, list=6%, signal=22%	CHD4/GYS1/TARDBP/SAFB2/NDUFA11/GTF2I/DBN1/RUFY1/MYL6/MRPS17/NLN/ACTC1/NDUFS1/NUBPL/SLC7A11/ARMC6/PDLIM1/ACTG2/IPO4/HNRNPM
PRKCA	0.854922	1.37573	0.0182601	2473	tags=19%, list=4%, signal=18%	DHX9/HNRNPU/GTF2I/NUBPL/ANP32E/NCKAP1/AAAS/SMPD4/RPA1/SPART/IPO7/MYH10/FANCI/CHCHD3/CNOT1/PRDX1
PRKAB1	0.808921	1.37572	0.0145891	2743	tags=19%, list=5%, signal=18%	SART3/AAAS/GCN1/HNRNPU/NDUFS2/LRPPRC/RRP1/SMPD4/SLC3A2/TARDBP/BOP1/CNOT1/ABI2/SPART/PML/CHCHD3
PANK4	0.845114	1.37565	0.0338539	2625	tags=21%, list=5%, signal=20%	SART3/SMPD4/CAPZB/DHX9/GYS1/FLNA/ACTN4/PRDX1/GCN1/GTF2I/NCKAP1/TLN1/DBN1/RNH1/INF2/EPAS1/SQSTM1/ZHX2
GCA	0.854534	1.3756	0.0081568	3048	tags=20%, list=6%, signal=19%	CAPZB/IQGAP1/GYS1/PCBP2/ABI2/SMPD4/LRPPRC/DHX9/RUFY1/SART3/FLNA/HNRNPA3/ACTG1/MYL6/STRAP/ANP32E/NUBPL
MAPKAPK3	0.826434	1.37531	0.0177578	3371	tags=23%, list=6%, signal=21%	FANCI/WASF2/GCN1/MRPS17/BRK1/CHCHD3/DBN1/SART3/CAPZB/HNRNPA3/RUFY1/CNOT1/SMPD4/NSUN2/SLC7A11/SPART/ZHX2/HNRNPU/ACTG1
COPZ1	0.886673	1.3753	0.00574782	1858	tags=20%, list=3%, signal=20%	PCBP2/TARDBP/FANCI/SART3/SMPD4/RAC1/HNRNPA3/HNRNPU/AAAS/HNRNPM/GYS1/TNKS1BP1/PRC1/ANP32E/BRK1/RPA1/SLC2A3
ZNF711	0.88239	1.37528	0.00998013	2548	tags=21%, list=5%, signal=20%	ABI2/SMPD4/ACTG1/HNRNPU/MYH9/HNRNPM/TARDBP/FANCI/AAAS/ACTA1/SPART/WASF2/SLC2A1/PCBP2/CHCHD3/ACTG2/SAFB2/BOP1
CCDC125	0.77649	1.37517	0.0313546	5014	tags=33%, list=9%, signal=30%	CD2AP/NLN/HNRNPU/GTF2I/RUFY1/NDUFS2/BOP1/CYFIP1/ANP32E/SLC2A3/NDUFA10/NDUFA11/ACTA1/TNKS1BP1/SLC2A1/ACTN4/MYH9/SART3/FANCI/EPAS1/PRC1/MYL6/FLNA/ACTB/MRPS17/ACTG1/MYH10/RNH1
OIP5	0.917415	1.37513	0.0368171	584	tags=7%, list=1%, signal=7%	FANCI/PRC1/DHX9/HNRNPM/SAFB2/GCN1
HRCT1	0.774972	1.37511	0.0460358	5843	tags=30%, list=11%, signal=27%	BOP1/RRP1/DBN1/PRDX1/IQGAP1/NLN/MRPS17/FLNB/SLC2A3/ACTG2/NDUFS1/IPO4/PDLIM1/HNRNPM/MYL6/ACTA1/PML/HNRNPH1/DHX9/PPM1F/GCN1/NUBPL/NDUFC1/NDUFS2/INF2
AC008770.3	0.86129	1.37505	0.0179706	2573	tags=18%, list=5%, signal=17%	GTF2I/EPAS1/SQSTM1/ACTB/TNKS1BP1/SAFB2/MYL6/SPART/CAPZB/SMPD4/TRIP6/RAC1/RPN1/ACTA1/ARMC6
SLC12A9	0.849638	1.37505	0.00888513	3262	tags=25%, list=6%, signal=24%	ATXN10/HNRNPU/TRIP6/ABI2/LRPPRC/FANCI/GCN1/MYL6/SMPD4/RNH1/DBN1/SPART/RPA1/INF2/NDUFA10/TARDBP/GYS1/CYFIP1/ZHX2/TNKS1BP1/MYH9
RPL41	0.86172	1.37502	0.03298	2363	tags=20%, list=4%, signal=19%	BRK1/HNRNPM/PCBP2/MYL6/SART3/AAAS/NDUFA10/HNRNPU/DHX9/FLNA/RPA1/SLC3A2/ACTA1/EPAS1/IPO4/TARDBP/SLC2A3
RPL41P1	0.816655	1.375	0.0399501	1995	tags=17%, list=4%, signal=16%	RNH1/BRK1/HNRNPM/CNOT1/PCBP2/HNRNPH1/DBN1/FLNA/ACTG1/MRPS17/CHD4/ACTG2/RPA1/RPN1
HNRNPA1	0.9218	1.37499	0.00240831	2116	tags=26%, list=4%, signal=25%	HNRNPH1/DHX9/HNRNPM/PCBP2/AAAS/RPA1/SAFB2/HNRNPU/HNRNPA3/TARDBP/ABI2/RUFY1/DSTN/GCN1/IPO7/ACTG2/ACTG1/RPN1/MYH10/SAMM50/LRPPRC/CD2AP
AC137630.1	0.872833	1.37491	0.010768	2031	tags=13%, list=4%, signal=13%	ABI2/HNRNPM/ACTG1/AAAS/IPO4/MYH9/PPM1F/ANP32E/SMPD4/HNRNPH1/TLN1
VRK1	0.901385	1.37486	0.00900344	1176	tags=15%, list=2%, signal=15%	FANCI/HNRNPM/RPN1/TARDBP/HNRNPA3/AAAS/SLC2A1/ABI2/PRC1/PCBP2/CD2AP/HNRNPH1/RAC1
ZNF234	0.90597	1.37479	0.0134563	1507	tags=14%, list=3%, signal=14%	IPO7/DHX9/HNRNPU/SART3/HNRNPH1/ACTG1/SAFB2/CD2AP/NUBPL/GYS1/ANP32E/TARDBP
ZSCAN5A	0.853884	1.37477	0.0127907	2860	tags=18%, list=5%, signal=17%	GYS1/GCN1/HNRNPM/SART3/DBN1/ABI2/HNRNPU/PPM1F/ACTG1/NDUFC1/TNKS1BP1/CHCHD3/FANCI/PCBP2/BOP1
AC254633.1	0.834712	1.37475	0.0213245	1484	tags=10%, list=3%, signal=9%	GTF2I/CNOT1/TNKS1BP1/ACTN4/ARMC6/FLNB/PRDX1/SLC3A2
SEPTIN7P1	0.862607	1.37472	0.040267	2614	tags=7%, list=5%, signal=7%	STRAP/GTF2I/SLC2A3/ANP32E/IPO7/SLC7A11
RANGAP1	0.896059	1.3747	0.00734512	2345	tags=24%, list=4%, signal=23%	ATXN10/RRP1/RPN1/DBN1/HNRNPA3/ACTB/TRIP6/MYH9/SMPD4/INF2/PPM1F/RNH1/ACTG1/RAC1/BOP1/SAMM50/MRPS17/RUFY1/TARDBP/ZHX2
PLCE1-AS1	0.895818	1.37466	0.0436242	2022	tags=13%, list=4%, signal=13%	RUFY1/RNH1/FLNA/CD2AP/IQGAP1/ACTG1/SLC7A11/ACTA2/PPM1F/CAPZB/ABI2
VPS54	0.917607	1.37466	0.00114157	760	tags=14%, list=1%, signal=14%	DHX9/HNRNPU/LRPPRC/SMPD4/NCKAP1/SART3/IPO7/HNRNPA3/ABI2/HNRNPM/RPA1/CD2AP
WBP11	0.915119	1.37457	0.00121705	2472	tags=32%, list=4%, signal=31%	STRAP/SMPD4/DHX9/HNRNPU/IPO7/ACTN4/SART3/GTF2I/DSTN/CNOT1/FANCI/FLNB/NDUFS1/DBN1/ABI2/ATXN10/ACTC1/BRK1/RPA1/MYH9/INF2/PRC1/HNRNPM/SQSTM1/TRIP6/HNRNPH1/MRPS17
SNN	0.864123	1.37446	0.0123414	3793	tags=30%, list=7%, signal=28%	PML/ATXN10/CYFIP1/FLNA/TLN1/GYS1/NCKAP1/ACTA2/WASF2/MYH9/DHX9/ACTN4/IQGAP1/NDUFS1/SLC7A11/NDUFS2/SQSTM1/BRK1/SLC2A3/CD2AP/RAC1/FLNB/DSTN/ACTG1/CHCHD3
SPPL3	0.901324	1.3744	0.0101814	1121	tags=15%, list=2%, signal=15%	TARDBP/HNRNPA3/GCN1/HNRNPU/DHX9/MYL6/SART3/PML/RRP1/FANCI/ABI2/GYS1/SQSTM1
IP6K1	0.875067	1.37439	0.0189824	3305	tags=25%, list=6%, signal=24%	WASF2/HNRNPU/SMPD4/RPA1/SART3/HNRNPM/NCKAP1/ZHX2/IPO4/NLN/IPO7/HNRNPA3/ATXN10/DHX9/RAC1/OXSM/DSTN/MYH9/FLNB/ACTB/CD2AP
PPP4C	0.852752	1.37435	0.0458695	4015	tags=25%, list=7%, signal=23%	BRK1/MYL6/AAAS/CAPZB/RNH1/SAFB2/RUFY1/NDUFC1/FANCI/MYH9/HNRNPM/CHD4/NDUFS1/RRP1/STRAP/TARDBP/WASF2/IQGAP1/NLN/RPN1/TNKS1BP1
ZNF589	0.866885	1.37435	0.00965486	3721	tags=27%, list=7%, signal=26%	SMPD4/ABI2/SART3/HNRNPH1/TARDBP/BRK1/AAAS/FANCI/ACTB/PRC1/LRPPRC/RRP1/MYH10/PPM1F/ACTA1/HNRNPM/WASF2/IQGAP1/GCN1/MYL6/SQSTM1/OXSM/DBN1
MGME1	0.901665	1.3743	0.00602997	1977	tags=20%, list=4%, signal=20%	FANCI/HNRNPU/HNRNPA3/AAAS/ABI2/SMPD4/CD2AP/DHX9/RPA1/SART3/ACTN4/TARDBP/BRK1/GCN1/NSUN2/PRC1/NLN
C15orf40	0.831494	1.37427	0.0206836	2565	tags=20%, list=5%, signal=19%	TARDBP/PCBP2/AAAS/DHX9/CAPZB/HNRNPU/ATXN10/CHCHD3/CHD4/FANCI/GCN1/RPN1/MRPS17/SMPD4/BRK1/PDLIM1/SAFB2
ARF3	0.91123	1.37421	0.00113319	2865	tags=32%, list=5%, signal=31%	SART3/DHX9/ABI2/IQGAP1/TARDBP/GCN1/HNRNPA3/HNRNPM/SMPD4/GYS1/MYH10/FANCI/WASF2/PPM1F/ACTN4/PML/FLNA/AAAS/SLC2A1/TNKS1BP1/ATXN10/DSTN/MYH9/TLN1/CD2AP/RUFY1/NDUFA10
HES5	0.77784	1.37415	0.0473934	4808	tags=17%, list=9%, signal=15%	ACTA2/ACTG2/MRPS17/SLC2A1/NDUFC1/NDUFS1/DSTN/ACTB/PDLIM1/NDUFS2/SAMM50/NLN/AAAS/SLC7A11
UBQLN4P1	0.861257	1.37402	0.0221214	2956	tags=23%, list=5%, signal=21%	GTF2I/CNOT1/IPO7/LRPPRC/RPN1/DHX9/RPA1/FANCI/NCKAP1/NDUFS1/ATXN10/OXSM/CYFIP1/SAMM50/NUBPL/PDLIM1/PML/WASF2/NDUFA11
AC126474.1	0.809991	1.37402	0.0181721	1758	tags=8%, list=3%, signal=8%	PRDX1/WASF2/RUFY1/SLC2A1/CAPZB/STRAP/PCBP2
OLA1P1	0.871083	1.37402	0.0119179	1009	tags=15%, list=2%, signal=15%	DHX9/HNRNPU/GCN1/IPO7/CNOT1/ABI2/SLC2A1/HNRNPH1/ACTN4/SMPD4/WASF2/NCKAP1/RAC1
LIN9	0.938837	1.37396	0.000699428	2009	tags=17%, list=4%, signal=16%	DHX9/HNRNPU/HNRNPA3/SMPD4/FANCI/PCBP2/AAAS/ANP32E/SART3/CD2AP/WASF2/ACTA2/MYH9/RPA1
ADIPOR2	0.821336	1.37388	0.0130292	3308	tags=20%, list=6%, signal=19%	GTF2I/NCKAP1/SART3/SMPD4/STRAP/SAMM50/SLC2A3/SPART/NDUFS1/CNOT1/SLC3A2/LRPPRC/BOP1/MYH10/NDUFA10/MYL6/ACTB
DIS3L2	0.832186	1.37388	0.0253832	3651	tags=27%, list=7%, signal=26%	SMPD4/SART3/NDUFA10/HNRNPA3/RPA1/TNKS1BP1/NCKAP1/ACTB/ABI2/WASF2/NDUFS1/DHX9/NSUN2/HNRNPU/CD2AP/CYFIP1/PPM1F/ARMC6/DSTN/GCN1/CHCHD3/MYH9/ACTA2
RBM14	0.940458	1.37386	0.000750112	986	tags=23%, list=2%, signal=22%	DHX9/TARDBP/HNRNPU/SART3/HNRNPM/HNRNPA3/GCN1/HNRNPH1/RPA1/AAAS/FANCI/SAFB2/BRK1/GYS1/PML/RAC1/PCBP2/ANP32E/ACTA1
PRKDC	0.881724	1.37384	0.0201026	1948	tags=26%, list=4%, signal=25%	DHX9/IPO7/HNRNPU/GCN1/LRPPRC/SMPD4/HNRNPA3/NCKAP1/HNRNPM/BOP1/RPA1/FANCI/PPM1F/WASF2/NSUN2/CYFIP1/RAC1/PRDX1/CD2AP/ATXN10/FLNB/ANP32E
EBNA1BP2	0.859043	1.37384	0.0205327	2268	tags=13%, list=4%, signal=13%	PRDX1/TARDBP/RNH1/CHCHD3/BRK1/MYH10/BOP1/AAAS/HNRNPH1/WASF2/NDUFS2
TMPPE	0.880385	1.3738	0.0102739	2475	tags=18%, list=4%, signal=17%	HNRNPU/DHX9/HNRNPA3/CNOT1/SART3/WASF2/EPAS1/TLN1/PRC1/NCKAP1/MYH9/ACTN4/GTF2I/HNRNPM/NDUFS1
AC008758.2	0.803905	1.3737	0.0393487	4237	tags=15%, list=8%, signal=14%	SAMM50/ZHX2/TARDBP/ARMC6/SAFB2/EPAS1/CD2AP/SLC2A1/PRDX1/CHD4/ACTG1/RNH1/SLC3A2
SNAP23	0.880742	1.37368	0.0176577	2116	tags=15%, list=4%, signal=15%	CYFIP1/CNOT1/GTF2I/MYL6/WASF2/DHX9/IPO7/RAC1/EPAS1/TLN1/NCKAP1/NDUFC1/NDUFA10
AACS	0.860028	1.37359	0.0165399	2077	tags=20%, list=4%, signal=20%	FANCI/DBN1/GCN1/GYS1/ABI2/RPA1/WASF2/TARDBP/HNRNPU/SART3/SMPD4/HNRNPM/NDUFC1/DSTN/NSUN2/AAAS/SLC7A11
CNIH2	0.905923	1.3735	0.00452354	1621	tags=20%, list=3%, signal=20%	AAAS/TARDBP/PRC1/SAFB2/HNRNPM/SLC2A3/ACTA1/GTF2I/PCBP2/NLN/PPM1F/RPA1/GYS1/SLC7A11/ZHX2/PDLIM1/ACTN4
OR4A49P	0.999945	1.37344	0.0102209	4	tags=1%, list=0%, signal=1%	NDUFS1
FHL3	0.870527	1.37337	0.0216671	3306	tags=24%, list=6%, signal=22%	DBN1/RAC1/TARDBP/ACTB/PCBP2/ACTG1/UBASH3B/BRK1/ACTA2/FLNA/RNH1/PPM1F/ACTG2/ARMC6/ACTA1/BOP1/ACTN4/PDLIM1/FANCI/ATXN10
PANK2	0.891972	1.37332	0.0086218	1783	tags=23%, list=3%, signal=22%	HNRNPU/HNRNPM/AAAS/DHX9/SART3/RPA1/CD2AP/SMPD4/SAFB2/GTF2I/ACTN4/IPO7/ZHX2/STRAP/CAPZB/SPART/NDUFA10/MYH9/PCBP2
CDH24	0.870135	1.37332	0.0197031	2429	tags=17%, list=4%, signal=16%	HNRNPM/FANCI/RPA1/HNRNPH1/SAFB2/GYS1/ARMC6/SART3/PML/PDLIM1/DBN1/CHCHD3/ANP32E/RPN1
ING5	0.883557	1.37331	0.00585034	2528	tags=19%, list=5%, signal=18%	SMPD4/HNRNPA3/AAAS/NDUFA10/PCBP2/HNRNPU/SAFB2/CD2AP/BOP1/ACTC1/RRP1/SAMM50/RPA1/RUFY1/MYH10/ABI2
C10orf88	0.882363	1.37329	0.016993	1180	tags=10%, list=2%, signal=9%	CD2AP/DHX9/SMPD4/HNRNPU/ABI2/RPA1/AAAS/SART3
ZNF286A	0.888037	1.37328	0.00466279	1313	tags=12%, list=2%, signal=12%	DHX9/HNRNPU/SMPD4/RPA1/SART3/ABI2/HNRNPA3/ACTN4/ATXN10/STRAP
MTCO1P14	0.979687	1.37328	0.0393701	4	tags=1%, list=0%, signal=1%	RPN1
ITGA7	0.767944	1.37318	0.0284329	3622	tags=18%, list=7%, signal=17%	ACTA2/FLNA/SQSTM1/TNKS1BP1/PML/DSTN/NDUFC1/PCBP2/IPO7/GYS1/RUFY1/RPN1/CYFIP1/PPM1F/ACTN4
HAUS5	0.905535	1.37318	0.00569749	727	tags=13%, list=1%, signal=13%	AAAS/SMPD4/SART3/FANCI/HNRNPH1/HNRNPA3/HNRNPM/SAFB2/DHX9/RRP1/HNRNPU
AC113208.3	0.922213	1.37314	0.00417897	2507	tags=12%, list=5%, signal=11%	DBN1/ABI2/IPO7/FANCI/RPA1/CD2AP/OXSM/NDUFS1/DHX9/ATXN10
ZNF133	0.882288	1.37307	0.0163162	2868	tags=24%, list=5%, signal=23%	AAAS/SMPD4/SAFB2/FANCI/HNRNPA3/HNRNPH1/GYS1/DHX9/NDUFA11/CD2AP/IPO4/TARDBP/GCN1/HNRNPU/EPAS1/SPART/SART3/PCBP2/MYL6/NDUFA10
PARS2	0.830607	1.37302	0.0348558	2427	tags=29%, list=4%, signal=27%	GCN1/OXSM/SART3/DHX9/HNRNPM/RPA1/CHCHD3/CAPZB/WASF2/LRPPRC/NDUFA10/NDUFS2/NSUN2/RNH1/PRDX1/TRIP6/FLNB/NUBPL/EPAS1/MRPS17/HNRNPU/AAAS/TLN1/TNKS1BP1
CAD	0.904861	1.37299	0.00219424	2666	tags=33%, list=5%, signal=32%	DHX9/HNRNPU/LRPPRC/SART3/RPA1/SMPD4/HNRNPM/CD2AP/IPO7/AAAS/ANP32E/GYS1/GCN1/SAFB2/WASF2/FLNA/ACTB/ABI2/STRAP/ACTN4/TNKS1BP1/CAPZB/CYFIP1/SAMM50/TLN1/NDUFA10/BOP1/RNH1
ZBTB22	0.86528	1.37293	0.0284738	2337	tags=17%, list=4%, signal=16%	CD2AP/AAAS/DHX9/PDLIM1/RPA1/RNH1/PML/SLC2A3/ANP32E/STRAP/GTF2I/GYS1/IPO4/PRC1
WAC-AS1	0.858555	1.3729	0.0113339	2919	tags=20%, list=5%, signal=19%	SMPD4/HNRNPU/AAAS/RPA1/CAPZB/SART3/HNRNPA3/CD2AP/ARMC6/HNRNPH1/CHD4/SLC7A11/ACTBL2/OXSM/NLN/MYL6/ANP32E
KIAA1586	0.880107	1.37285	0.0132853	1132	tags=15%, list=2%, signal=15%	DHX9/CD2AP/HNRNPH1/ANP32E/HNRNPA3/IPO7/AAAS/SMPD4/ATXN10/IQGAP1/SART3/SQSTM1/HNRNPU
SLC25A14	0.872581	1.37284	0.0362812	2615	tags=25%, list=5%, signal=24%	RPA1/AAAS/SMPD4/FANCI/DHX9/SLC2A1/SART3/ACTB/PCBP2/GYS1/SAMM50/TARDBP/ARMC6/SLC7A11/ACTN4/ABI2/DBN1/RPN1/SAFB2/TRIP6/HNRNPA3
PRAF2	0.851513	1.37283	0.0136693	2166	tags=13%, list=4%, signal=13%	CHD4/MYL6/NDUFA11/RAC1/CNOT1/DHX9/RRP1/BOP1/BRK1/ARMC6/ACTB
GAD1	0.927826	1.37282	0.0013378	1763	tags=17%, list=3%, signal=16%	SLC2A1/GYS1/RUFY1/PCBP2/ACTBL2/ARMC6/RNH1/TLN1/NCKAP1/OXSM/CHD4/ACTG2/SLC7A11/PPM1F
CLDND2	0.817008	1.3728	0.0378973	2178	tags=15%, list=4%, signal=15%	EPAS1/SART3/CHD4/SLC7A11/FANCI/SLC2A3/ZHX2/GTF2I/HNRNPM/NDUFA11/TARDBP/RRP1/NUBPL
GTPBP3	0.860507	1.3728	0.0134978	2695	tags=23%, list=5%, signal=22%	HNRNPU/SART3/AAAS/SMPD4/FANCI/ANP32E/SAFB2/PCBP2/CYFIP1/HNRNPH1/RPA1/DHX9/GTF2I/MRPS17/ARMC6/BRK1/RAC1/NDUFS1/NDUFS2
ANP32A	0.867597	1.37277	0.00907981	1795	tags=23%, list=3%, signal=22%	TARDBP/RUFY1/HNRNPU/BRK1/ATXN10/ABI2/AAAS/HNRNPA3/SAMM50/PRC1/PML/HNRNPM/PCBP2/CYFIP1/MYL6/ACTN4/ACTB/SART3/SAFB2
EIF4BP7	0.837761	1.37276	0.0312876	3166	tags=29%, list=6%, signal=27%	LRPPRC/TARDBP/GCN1/PCBP2/IPO7/GTF2I/SART3/BRK1/ATXN10/HNRNPM/SQSTM1/HNRNPA3/CYFIP1/AAAS/DHX9/TLN1/HNRNPU/RPN1/ZHX2/ACTB/NDUFS2/CNOT1/SLC2A1/SAMM50
PBX2P1	0.866343	1.37272	0.0173634	2608	tags=23%, list=5%, signal=22%	GTF2I/HNRNPA3/IPO7/SMPD4/CYFIP1/DHX9/RPA1/CD2AP/TARDBP/EPAS1/LRPPRC/FLNA/SPART/TRIP6/NDUFA10/MYH10/PRC1/HNRNPM/ACTA2
POLR1B	0.898153	1.37258	0.00347833	1509	tags=17%, list=3%, signal=16%	NCKAP1/IPO7/GTF2I/DHX9/LRPPRC/CNOT1/HNRNPU/SMPD4/NDUFA11/NSUN2/ZHX2/ANP32E/NUBPL/CHD4
NCOA4	0.885854	1.37253	0.0147606	1058	tags=12%, list=2%, signal=12%	GTF2I/CNOT1/MYH10/NUBPL/IPO7/DHX9/ATXN10/NDUFS1/FLNB/RUFY1
SCAMP1	0.866986	1.37252	0.0248861	1621	tags=15%, list=3%, signal=15%	IPO7/CD2AP/NCKAP1/HNRNPH1/DHX9/NLN/DSTN/CYFIP1/WASF2/OXSM/NSUN2/STRAP/CNOT1
IGFBPL1	0.817585	1.37251	0.0271711	3968	tags=11%, list=7%, signal=10%	PCBP2/ACTN4/ARMC6/SLC7A11/TLN1/RPN1/CHD4/OXSM/PML
USP21	0.92756	1.37245	0.0037563	1529	tags=19%, list=3%, signal=19%	HNRNPU/DHX9/ANP32E/SMPD4/SART3/RPA1/HNRNPM/SAFB2/CD2AP/RUFY1/GCN1/AAAS/HNRNPH1/HNRNPA3/PRDX1/ATXN10
KDM1A	0.917796	1.37243	0.00226373	1884	tags=27%, list=3%, signal=26%	CAPZB/TARDBP/SART3/HNRNPM/SMPD4/DHX9/HNRNPH1/AAAS/RNH1/WASF2/PCBP2/RRP1/SAFB2/PRDX1/MYL6/FANCI/HNRNPA3/HNRNPU/BRK1/ZHX2/CHD4/DSTN/OXSM
DUSP8	0.772331	1.37225	0.0367647	2276	tags=19%, list=4%, signal=18%	ACTB/MYH9/TRIP6/NDUFC1/ZHX2/CD2AP/RAC1/CAPZB/PDLIM1/INF2/ABI2/SQSTM1/PPM1F/PRC1/PRDX1/MRPS17
POU2F1	0.926091	1.37223	0.00162949	1047	tags=13%, list=2%, signal=13%	HNRNPU/SMPD4/CD2AP/DHX9/SART3/RPA1/HNRNPA3/NCKAP1/WASF2/HNRNPM/CYFIP1
TRIP10	0.850535	1.37213	0.0172951	2634	tags=24%, list=5%, signal=23%	HNRNPU/HNRNPA3/TARDBP/DBN1/MYH9/ACTG1/ACTB/SMPD4/SAFB2/ACTG2/PML/FLNA/SQSTM1/ACTN4/BRK1/HNRNPM/GYS1/CD2AP/WASF2/CHCHD3
SUCLA2	0.876333	1.37194	0.0200577	2806	tags=24%, list=5%, signal=23%	CNOT1/DHX9/NCKAP1/NDUFS1/TLN1/RPA1/SPART/NDUFS2/CYFIP1/CHCHD3/LRPPRC/GTF2I/SMPD4/MYH10/ACTN4/PRDX1/ACTA1/RRP1/ARMC6/SART3
AC009806.1	0.893152	1.37193	0.0103214	1106	tags=5%, list=2%, signal=5%	TARDBP/HNRNPM/ACTB/NDUFS2
SAR1A	0.849977	1.37184	0.036215	3390	tags=24%, list=6%, signal=22%	SMPD4/TARDBP/CD2AP/HNRNPM/DHX9/SART3/IPO7/ABI2/RPA1/STRAP/INF2/BRK1/CNOT1/SLC7A11/CAPZB/ANP32E/BOP1/RPN1/ACTB/HNRNPA3
NCEH1	0.934606	1.37179	0.00163364	1680	tags=20%, list=3%, signal=20%	IQGAP1/UBASH3B/ABI2/DSTN/RAC1/IPO7/NCKAP1/DBN1/PML/WASF2/SART3/CD2AP/ACTB/MYH9/FLNA/INF2/ACTBL2
DYNC2LI1	0.857317	1.37176	0.0281532	1570	tags=18%, list=3%, signal=17%	HNRNPU/HNRNPA3/DHX9/ABI2/SMPD4/SART3/AAAS/RPA1/TARDBP/RPN1/DBN1/IPO7/NDUFA11/TNKS1BP1/FANCI
SEPTIN9	0.859425	1.37168	0.0151279	2048	tags=20%, list=4%, signal=20%	DHX9/SART3/RPA1/HNRNPM/ACTG1/HNRNPU/RAC1/INF2/ABI2/ACTN4/HNRNPA3/TLN1/FLNA/CAPZB/FLNB/FANCI/GCN1
SIRPA	0.815704	1.37167	0.0281675	5440	tags=29%, list=10%, signal=26%	PML/INF2/DSTN/UBASH3B/ACTB/FLNB/TNKS1BP1/ARMC6/NLN/SPART/ABI2/NDUFA11/MYH10/SAFB2/MRPS17/NCKAP1/RAC1/CD2AP/DBN1/SMPD4/ATXN10/NDUFS2/ACTN4/OXSM
MARS1	0.868307	1.37165	0.00686261	3040	tags=31%, list=6%, signal=29%	SART3/GCN1/FANCI/HNRNPM/CD2AP/TARDBP/IPO7/ZHX2/NSUN2/ATXN10/IPO4/WASF2/AAAS/BOP1/CYFIP1/SLC3A2/CAPZB/SLC2A1/ACTG1/SAFB2/NDUFC1/FLNA/PRDX1/SLC2A3/MYL6/SLC7A11
ILKAP	0.890527	1.37165	0.00777125	2007	tags=21%, list=4%, signal=21%	TARDBP/HNRNPM/BRK1/HNRNPA3/NDUFA10/AAAS/MYL6/SART3/BOP1/ATXN10/RNH1/PCBP2/SAFB2/NSUN2/HNRNPU/OXSM/UBASH3B/ACTA1
BUD23	0.838201	1.3716	0.0292056	2804	tags=19%, list=5%, signal=18%	RAC1/PCBP2/TARDBP/RNH1/BRK1/SLC2A1/BOP1/RRP1/TRIP6/SLC7A11/IPO4/SLC3A2/CHD4/ACTA2/CHCHD3/ACTB
NUFIP1	0.843868	1.37154	0.0330579	3055	tags=21%, list=6%, signal=20%	DHX9/HNRNPM/HNRNPU/ACTG1/BOP1/SMPD4/PDLIM1/ZHX2/SQSTM1/PML/RPA1/IPO4/CD2AP/GYS1/RUFY1/RAC1/HNRNPA3/ACTN4
DGUOK	0.877175	1.37146	0.00475039	1684	tags=17%, list=3%, signal=16%	CHD4/PCBP2/BRK1/MYL6/TARDBP/HNRNPA3/RAC1/NUBPL/ABI2/UBASH3B/DBN1/ZHX2/BOP1/NDUFA10
WWP2	0.879727	1.37139	0.0376429	2325	tags=20%, list=4%, signal=19%	ACTN4/CNOT1/SART3/RNH1/TNKS1BP1/MYH9/SPART/TLN1/WASF2/FLNA/ACTA1/ACTA2/NCKAP1/HNRNPU/INF2/SLC2A3/ARMC6
LINC01675	0.883262	1.37135	0.00931797	1276	tags=7%, list=2%, signal=7%	SLC7A11/PRDX1/NUBPL/NLN/NSUN2/ACTC1
KLHL22	0.836213	1.37133	0.0229523	2697	tags=20%, list=5%, signal=19%	ATXN10/GCN1/PPM1F/SAMM50/ACTN4/RPA1/SMPD4/SLC7A11/HNRNPU/CHCHD3/DBN1/MYH9/SPART/MYL6/CYFIP1/FANCI/SLC2A3
EIF2S3	0.887333	1.37129	0.0116829	2091	tags=20%, list=4%, signal=19%	HNRNPU/SMPD4/FANCI/IPO7/LRPPRC/DHX9/STRAP/HNRNPM/CD2AP/GYS1/TARDBP/PCBP2/HNRNPA3/MYH9/GCN1/MYL6/RUFY1
SELENOI	0.823655	1.37126	0.0357143	1491	tags=15%, list=3%, signal=15%	LRPPRC/CNOT1/NDUFS1/IPO7/NCKAP1/CD2AP/NSUN2/SLC7A11/TNKS1BP1/CHD4/SMPD4/WASF2/HNRNPU
ELAVL1	0.899627	1.37125	0.00906971	1860	tags=19%, list=3%, signal=18%	DHX9/HNRNPM/SAFB2/HNRNPU/SMPD4/SART3/HNRNPH1/FANCI/IPO7/ABI2/HNRNPA3/ZHX2/GYS1/CHD4/RPN1/ACTG1
LINC02225	0.840449	1.37124	0.0419682	4374	tags=20%, list=8%, signal=19%	ATXN10/ZHX2/RPA1/SAMM50/WASF2/HNRNPA3/EPAS1/ARMC6/ANP32E/RAC1/NDUFA10/ABI2/PML/ACTB/MYL6/RPN1/PDLIM1
PIN1	0.853854	1.37118	0.0465116	2390	tags=18%, list=4%, signal=17%	NDUFA11/MYL6/GYS1/SAFB2/BRK1/ACTG2/TARDBP/SAMM50/ANP32E/MYH10/MYH9/INF2/GTF2I/GCN1/ZHX2
PTOV1	0.871175	1.37114	0.0193941	2202	tags=18%, list=4%, signal=17%	SAFB2/HNRNPM/SMPD4/NDUFA11/HNRNPA3/IPO4/GYS1/MYH10/AAAS/CHD4/SART3/MYL6/SLC2A1/HNRNPU/ARMC6
SLFN12	0.876226	1.3711	0.0261394	1145	tags=11%, list=2%, signal=11%	IQGAP1/FLNA/HNRNPH1/SPART/UBASH3B/ACTC1/RPA1/RAC1/CYFIP1
DESI2	0.897338	1.37087	0.0119193	2806	tags=18%, list=5%, signal=17%	HNRNPU/DHX9/TLN1/WASF2/ANP32E/NDUFA10/CAPZB/DSTN/NCKAP1/RAC1/AAAS/GYS1/ABI2/SMPD4/NDUFS1
HNRNPDL	0.912702	1.37086	0.00273375	1481	tags=20%, list=3%, signal=20%	HNRNPU/DHX9/HNRNPM/RPA1/HNRNPH1/ABI2/HNRNPA3/PCBP2/SMPD4/SART3/TARDBP/TLN1/TNKS1BP1/CYFIP1/NDUFC1/SAFB2/GYS1
FASTKD5	0.858012	1.37084	0.0327873	1829	tags=20%, list=3%, signal=20%	IPO7/TLN1/SMPD4/GCN1/HNRNPU/GTF2I/LRPPRC/DHX9/SART3/NSUN2/HNRNPA3/ATXN10/DSTN/NLN/NDUFS1/CNOT1/NDUFA10
CEP68	0.893368	1.37077	0.00986883	2356	tags=27%, list=4%, signal=26%	DHX9/RPA1/NCKAP1/FLNA/HNRNPU/LRPPRC/IPO7/HNRNPA3/SART3/HNRNPM/PCBP2/IQGAP1/DSTN/STRAP/ABI2/SLC2A3/FLNB/BOP1/UBASH3B/ATXN10/MYH9/SAMM50/SPART
CALR	0.809038	1.37076	0.0322981	3594	tags=18%, list=7%, signal=17%	RPN1/HNRNPA3/ACTN4/TLN1/NDUFC1/ATXN10/PRDX1/TRIP6/STRAP/NDUFS1/PDLIM1/IPO7/LRPPRC/IPO4/NDUFA11
DDX28	0.807162	1.37059	0.0453461	3324	tags=18%, list=6%, signal=17%	NDUFA10/NUBPL/NDUFC1/SLC2A1/MYL6/SAMM50/OXSM/INF2/PDLIM1/RUFY1/CAPZB/RPN1/SLC3A2/GTF2I/HNRNPH1
AL139156.2	0.739582	1.37057	0.0367799	5054	tags=31%, list=9%, signal=28%	TARDBP/NDUFC1/SLC2A1/GCN1/HNRNPA3/ACTN4/RPN1/SLC7A11/CHCHD3/IPO4/TNKS1BP1/ACTC1/MYH10/PML/BOP1/FLNB/NDUFA10/UBASH3B/PRDX1/CD2AP/ACTA2/ACTG1/PCBP2/ACTB/HNRNPH1/ACTA1
C1orf131	0.89125	1.37054	0.0226274	1286	tags=10%, list=2%, signal=9%	HNRNPU/SMPD4/HNRNPA3/DHX9/ANP32E/PDLIM1/NCKAP1/SART3
VWA7	0.813892	1.37052	0.0236361	3702	tags=18%, list=7%, signal=17%	MYH9/NSUN2/CNOT1/NLN/CYFIP1/NDUFS2/ACTN4/ATXN10/RNH1/PRDX1/FLNB/IPO7/AAAS/TLN1/SLC2A3
CHD7	0.85143	1.37048	0.0203541	3482	tags=20%, list=6%, signal=19%	ZHX2/LRPPRC/SMPD4/MYH9/IPO7/GTF2I/GCN1/HNRNPH1/BOP1/IQGAP1/UBASH3B/ACTG1/DSTN/FLNA/TARDBP/HNRNPA3/TRIP6
ADCY9	0.839406	1.37043	0.0183564	1880	tags=13%, list=3%, signal=13%	MYH9/ACTN4/FLNB/NDUFA11/GTF2I/CNOT1/TLN1/EPAS1/WASF2/PCBP2/SMPD4
ANKZF1	0.873794	1.37029	0.0105298	941	tags=14%, list=2%, signal=14%	HNRNPU/AAAS/SMPD4/TARDBP/HNRNPA3/HNRNPH1/SART3/NDUFA10/PPM1F/CD2AP/ANP32E/DHX9
MRPS28	0.820649	1.37029	0.0466321	3495	tags=15%, list=6%, signal=15%	BOP1/SQSTM1/IPO4/RNH1/PRDX1/SLC3A2/CHD4/CHCHD3/GYS1/IQGAP1/ACTG2/NDUFA10/ZHX2
VPS45	0.896356	1.3701	0.0153083	1579	tags=17%, list=3%, signal=16%	ANP32E/HNRNPU/DHX9/RPA1/RUFY1/NDUFS2/SAFB2/SART3/SMPD4/GYS1/HNRNPH1/HNRNPM/IPO4/TRIP6
SHISA5	0.796799	1.36999	0.036855	2814	tags=25%, list=5%, signal=24%	PML/BRK1/CAPZB/GCN1/INF2/PCBP2/CHD4/ATXN10/TARDBP/HNRNPM/TRIP6/SLC3A2/RPA1/ACTB/OXSM/SQSTM1/RRP1/WASF2/MYH9/NUBPL/DHX9
RNA5SP477	0.843177	1.36993	0.0360372	1654	tags=11%, list=3%, signal=10%	GCN1/MYH10/CAPZB/BRK1/CYFIP1/PDLIM1/LRPPRC/HNRNPM/SART3
SLC26A1	0.815822	1.36973	0.0307125	5337	tags=27%, list=10%, signal=25%	GTF2I/CNOT1/MYL6/CHD4/RUFY1/IQGAP1/PRC1/ACTB/LRPPRC/UBASH3B/ANP32E/PRDX1/OXSM/RNH1/GCN1/DBN1/WASF2/MYH10/GYS1/SQSTM1/BOP1/FANCI/HNRNPM
AC092614.1	0.854481	1.36969	0.0129164	1763	tags=12%, list=3%, signal=12%	NCKAP1/IPO7/DHX9/CD2AP/MYH9/ABI2/ACTN4/WASF2/UBASH3B/HNRNPU
DENR	0.918511	1.36966	0.00383752	1660	tags=21%, list=3%, signal=21%	TARDBP/GCN1/HNRNPU/HNRNPM/SMPD4/SART3/DHX9/NCKAP1/ATXN10/RPA1/AAAS/DBN1/HNRNPA3/CD2AP/FANCI/GYS1/TRIP6/OXSM
ZNF451-AS1	0.827856	1.36962	0.0222268	4420	tags=18%, list=8%, signal=16%	CD2AP/HNRNPU/IPO4/NDUFA10/DSTN/MYL6/ZHX2/ACTG2/NSUN2/SAFB2/RPA1/GYS1/SAMM50/MYH10/LRPPRC
ST3GAL2	0.870787	1.36956	0.0117034	2106	tags=26%, list=4%, signal=25%	CNOT1/SART3/ACTN4/NCKAP1/AAAS/SMPD4/ANP32E/PML/PPM1F/DHX9/CHD4/ACTB/MYH9/HNRNPA3/RNH1/GTF2I/TNKS1BP1/GYS1/NDUFS1/PCBP2/CAPZB/HNRNPM
AC096887.1	0.756705	1.36953	0.0344828	3945	tags=25%, list=7%, signal=23%	AAAS/DBN1/GCN1/WASF2/FANCI/NDUFS1/ACTG2/EPAS1/ACTG1/MYH10/SAFB2/INF2/ABI2/TRIP6/SLC3A2/PML/ACTB/DHX9/UBASH3B/FLNB/STRAP
PPA2	0.817214	1.3695	0.0316995	3273	tags=18%, list=6%, signal=17%	OXSM/GYS1/NDUFS2/NDUFA10/ANP32E/NDUFC1/SPART/PML/FANCI/CAPZB/PCBP2/NDUFA11/DSTN/HNRNPM/ACTN4
CNOT10	0.895456	1.36948	0.00429764	1292	tags=18%, list=2%, signal=17%	TARDBP/BRK1/DHX9/HNRNPA3/OXSM/PCBP2/HNRNPM/HNRNPU/RPA1/GCN1/FANCI/PRDX1/ZHX2/SART3/RPN1
CACYBP	0.88382	1.36934	0.0121327	1583	tags=17%, list=3%, signal=16%	HNRNPU/DHX9/HNRNPA3/RPA1/HNRNPM/SART3/DSTN/PCBP2/TARDBP/NDUFA11/GCN1/FANCI/PPM1F/RRP1
TMPO	0.920427	1.36928	0.00122248	957	tags=18%, list=2%, signal=18%	SART3/SMPD4/FANCI/HNRNPU/DHX9/NCKAP1/HNRNPA3/CYFIP1/IPO7/PRC1/CD2AP/ANP32E/PCBP2/RAC1/HNRNPH1
THADA	0.869457	1.36919	0.0077812	2901	tags=31%, list=5%, signal=29%	RPA1/DHX9/HNRNPU/PCBP2/ZHX2/TARDBP/CAPZB/GYS1/ABI2/HNRNPA3/BRK1/IPO4/MYL6/ATXN10/HNRNPM/PDLIM1/CNOT1/ACTB/STRAP/LRPPRC/SLC3A2/EPAS1/BOP1/SAFB2/FANCI/NLN
C12orf76	0.856049	1.36908	0.0190832	3351	tags=14%, list=6%, signal=13%	HNRNPA3/SART3/ABI2/DHX9/MYH9/LRPPRC/RPN1/MRPS17/HNRNPH1/CYFIP1/DBN1/ACTG1
CDYL	0.911452	1.36904	0.00429134	1231	tags=23%, list=2%, signal=22%	NCKAP1/DHX9/CD2AP/GTF2I/SMPD4/HNRNPU/HNRNPM/CYFIP1/IPO7/ACTN4/RPA1/PML/SLC3A2/DBN1/GCN1/SLC2A1/ATXN10/MYH9/LRPPRC
PIEZO1	0.836996	1.369	0.0235803	2667	tags=23%, list=5%, signal=22%	MYH9/CNOT1/NCKAP1/DSTN/CYFIP1/FLNA/CAPZB/ACTN4/PPM1F/WASF2/SART3/INF2/PML/DHX9/ARMC6/ANP32E/ACTBL2/SLC3A2/ACTC1
PLA2G15	0.813408	1.36897	0.0316857	3826	tags=21%, list=7%, signal=20%	CAPZB/PML/RAC1/FLNA/GYS1/UBASH3B/IQGAP1/SMPD4/BRK1/SAMM50/SLC3A2/NDUFS2/ACTG2/ACTB/NDUFS1/DSTN/NSUN2/SLC2A3
BMS1	0.919647	1.36884	0.000925809	1897	tags=25%, list=3%, signal=24%	HNRNPM/DHX9/SART3/IPO7/GCN1/HNRNPU/RPA1/SMPD4/LRPPRC/HNRNPA3/CD2AP/RUFY1/DBN1/ABI2/FANCI/PPM1F/TLN1/ATXN10/HNRNPH1/AAAS/MYH10
FAM86EP	0.79516	1.36883	0.0398406	2698	tags=20%, list=5%, signal=19%	SART3/GCN1/HNRNPU/MRPS17/CHCHD3/DHX9/NCKAP1/NSUN2/NDUFS1/PPM1F/RNH1/SAMM50/SLC3A2/NDUFS2/BOP1/RUFY1/AAAS
GEMIN7	0.839394	1.36881	0.0244968	2048	tags=17%, list=4%, signal=16%	HNRNPU/GCN1/CD2AP/DHX9/HNRNPH1/SMPD4/BOP1/NCKAP1/NDUFS1/ABI2/HNRNPA3/PPM1F/IPO4/SAFB2
BORA	0.930629	1.36876	0.00056789	855	tags=15%, list=2%, signal=15%	SART3/HNRNPA3/SMPD4/HNRNPH1/HNRNPU/DHX9/ACTN4/GCN1/FANCI/GTF2I/CHCHD3/ARMC6/ANP32E
ROBO1	0.77891	1.36875	0.0343075	3283	tags=19%, list=6%, signal=18%	SMPD4/ZHX2/IPO7/GCN1/HNRNPU/NCKAP1/PDLIM1/HNRNPH1/BOP1/ACTG2/SAMM50/LRPPRC/FLNA/ACTN4/RPA1/TRIP6
HNRNPA3P5	0.820454	1.36871	0.0252448	3014	tags=18%, list=5%, signal=17%	HNRNPA3/FANCI/HNRNPM/SAFB2/RPA1/RNH1/ANP32E/TARDBP/LRPPRC/IPO7/SART3/GTF2I/IQGAP1/STRAP/WASF2
ETF1	0.860943	1.36869	0.0212772	2335	tags=20%, list=4%, signal=19%	IPO7/DHX9/SART3/SLC3A2/HNRNPH1/HNRNPM/STRAP/NSUN2/CNOT1/PRDX1/CHCHD3/WASF2/NCKAP1/NLN/PML/OXSM/SQSTM1
PSMC3	0.849977	1.36867	0.0270623	3934	tags=26%, list=7%, signal=24%	RNH1/MYL6/RPN1/HNRNPU/CYFIP1/MRPS17/BRK1/CAPZB/RRP1/SLC3A2/CHD4/WASF2/NDUFA11/FANCI/NSUN2/AAAS/ACTG2/GTF2I/SLC2A1/TLN1/STRAP/CD2AP
RRP1B	0.861576	1.36867	0.0224423	2243	tags=19%, list=4%, signal=18%	DHX9/SART3/RRP1/SMPD4/GCN1/HNRNPH1/HNRNPU/RPA1/IPO7/ACTN4/FLNB/NDUFC1/SLC7A11/LRPPRC/SAFB2/ARMC6
CDC14B	0.875618	1.36865	0.0129987	2542	tags=11%, list=5%, signal=10%	NUBPL/CNOT1/GTF2I/AAAS/NDUFA11/NLN/TARDBP/TRIP6/RRP1
SMTN	0.86034	1.36862	0.0190291	2484	tags=25%, list=5%, signal=24%	SMPD4/DBN1/SLC2A3/MYH9/PRDX1/HNRNPM/RPA1/ACTB/PPM1F/FLNA/PCBP2/GYS1/HNRNPU/ACTA2/ACTG1/SART3/CAPZB/IQGAP1/ABI2/IPO4/MYL6
AL031985.4	0.801675	1.36862	0.0396341	5161	tags=18%, list=9%, signal=16%	NSUN2/PRDX1/HNRNPH1/BRK1/SLC2A3/ARMC6/UBASH3B/ACTG1/RPN1/ACTBL2/NDUFA10/FANCI/NDUFC1/DSTN/INF2
AL157789.1	0.95436	1.36861	0.0157287	2518	tags=8%, list=5%, signal=8%	HNRNPM/INF2/NSUN2/ARMC6/WASF2/SLC2A3/SPART
PEX1	0.881047	1.36856	0.019372	443	tags=6%, list=1%, signal=6%	GTF2I/CNOT1/IPO7/NDUFS1/DHX9
ZYX	0.837739	1.36855	0.0303854	1443	tags=15%, list=3%, signal=15%	ACTB/TRIP6/RAC1/PML/RPN1/INF2/ACTN4/TLN1/FLNA/MYH9/ACTG1/RNH1/TARDBP
AC087164.1	0.763262	1.36852	0.0340611	4167	tags=18%, list=8%, signal=17%	SAFB2/RPN1/NDUFS1/CAPZB/NDUFA11/AAAS/NUBPL/RUFY1/SLC2A3/MYH10/ACTG2/STRAP/PCBP2/TRIP6/ACTC1
TMEM123	0.819957	1.36851	0.0400778	3593	tags=20%, list=7%, signal=19%	EPAS1/TLN1/IPO7/GTF2I/CYFIP1/ATXN10/NCKAP1/SPART/CNOT1/SLC7A11/LRPPRC/ZHX2/SLC2A1/SLC2A3/WASF2/PCBP2/PRC1
KPNA5	0.856857	1.36845	0.0138622	1666	tags=13%, list=3%, signal=13%	HNRNPA3/ABI2/SART3/CHD4/LRPPRC/DBN1/TNKS1BP1/SMPD4/MYH10/OXSM/FANCI
TMLHE	0.843263	1.36845	0.0345622	4304	tags=31%, list=8%, signal=29%	NDUFS1/IPO7/CNOT1/GTF2I/TLN1/SLC2A3/ACTN4/HNRNPM/NDUFS2/GYS1/EPAS1/NDUFA11/DHX9/IPO4/RPA1/PRC1/SMPD4/UBASH3B/NUBPL/INF2/NDUFC1/ACTA1/CHCHD3/PCBP2/PRDX1/PDLIM1
ARL5A	0.900528	1.36833	0.0069137	1635	tags=18%, list=3%, signal=17%	DHX9/IPO7/SART3/HNRNPA3/NCKAP1/LRPPRC/CD2AP/ABI2/NDUFS1/SMPD4/FLNB/PRDX1/AAAS/SLC7A11/DBN1
TIMP4	0.819575	1.36827	0.0171531	2051	tags=12%, list=4%, signal=11%	ACTB/BRK1/SLC2A1/IPO4/SLC2A3/NDUFA11/SLC7A11/HNRNPM/RUFY1/SPART
VOPP1	0.871476	1.36822	0.0122284	2432	tags=25%, list=4%, signal=24%	RAC1/TARDBP/BRK1/ACTB/IQGAP1/MYL6/TLN1/RNH1/PCBP2/GCN1/RUFY1/PPM1F/NDUFA10/PML/TRIP6/WASF2/ABI2/GYS1/PDLIM1/STRAP/CAPZB
QARS1	0.862181	1.36815	0.0254676	2852	tags=24%, list=5%, signal=23%	BRK1/RRP1/SMPD4/RPA1/FLNB/SAFB2/TARDBP/IPO4/LRPPRC/AAAS/PPM1F/HNRNPU/GCN1/FANCI/ARMC6/PCBP2/SLC3A2/RPN1/ACTC1/ACTA2
WRAP73	0.859192	1.36812	0.0281532	1389	tags=14%, list=3%, signal=14%	CAPZB/AAAS/TARDBP/SART3/FANCI/CHCHD3/WASF2/TLN1/NDUFC1/OXSM/PRDX1/SLC2A1
TARBP2	0.846684	1.36807	0.0233267	3272	tags=26%, list=6%, signal=25%	AAAS/PCBP2/TARDBP/ABI2/DBN1/RRP1/RUFY1/SART3/HNRNPM/PML/RPA1/GCN1/RPN1/OXSM/HNRNPA3/ATXN10/PDLIM1/SLC7A11/IQGAP1/BRK1/LRPPRC/NDUFC1
CYRIB	0.911386	1.36803	0.00354887	1576	tags=20%, list=3%, signal=20%	HNRNPU/ZHX2/BOP1/HNRNPM/DHX9/LRPPRC/SART3/SLC3A2/WASF2/HNRNPA3/FANCI/RNH1/SLC2A1/BRK1/IQGAP1/ACTG1/UBASH3B
IER3IP1	0.803794	1.36799	0.045122	4164	tags=20%, list=8%, signal=19%	HNRNPA3/PCBP2/CHD4/FANCI/SART3/TARDBP/STRAP/UBASH3B/RPN1/HNRNPH1/PPM1F/PDLIM1/MYL6/NDUFS1/BRK1/SLC3A2/NDUFS2
H2BP2	0.892504	1.3679	0.0332968	1730	tags=7%, list=3%, signal=7%	CAPZB/ACTB/UBASH3B/SQSTM1/SAMM50/TARDBP
NAA25	0.938588	1.36782	0.00417068	1224	tags=18%, list=2%, signal=17%	SART3/GCN1/DHX9/HNRNPA3/SMPD4/LRPPRC/CD2AP/HNRNPH1/TARDBP/HNRNPU/IPO7/DBN1/STRAP/NSUN2/INF2
YARS2	0.867073	1.36777	0.00817287	3688	tags=32%, list=7%, signal=30%	SART3/RPA1/STRAP/DHX9/LRPPRC/DBN1/ABI2/PCBP2/NDUFC1/SMPD4/IPO4/ACTG2/ATXN10/OXSM/BRK1/UBASH3B/TLN1/NSUN2/HNRNPU/CHCHD3/SLC3A2/MYH10/IQGAP1/IPO7/ACTN4/RNH1/NDUFS1
SUN2	0.89685	1.36764	0.0207085	1268	tags=14%, list=2%, signal=14%	CNOT1/MYH9/SMPD4/LRPPRC/GTF2I/EPAS1/FLNB/NUBPL/PDLIM1/ACTN4/CHD4/GYS1
DCTN3	0.833509	1.36758	0.024505	4747	tags=31%, list=9%, signal=28%	HNRNPM/RNH1/MYL6/AAAS/PCBP2/UBASH3B/SMPD4/HNRNPA3/ACTA2/GCN1/ACTA1/LRPPRC/SAFB2/TLN1/BRK1/DHX9/GYS1/ARMC6/CHD4/RPA1/NDUFA10/NDUFS1/CNOT1/TNKS1BP1/SLC3A2/INF2
MAPK8IP1	0.789398	1.36752	0.0323226	4775	tags=24%, list=9%, signal=22%	TNKS1BP1/ACTA2/GTF2I/CNOT1/MYH10/RNH1/OXSM/SLC2A3/BOP1/HNRNPM/PRC1/DBN1/CYFIP1/TARDBP/NDUFA10/SLC7A11/ACTC1/PDLIM1/ZHX2/FLNB
EAF2	0.818864	1.36747	0.0122905	4246	tags=20%, list=8%, signal=19%	TARDBP/CAPZB/PRDX1/DHX9/SAFB2/ANP32E/HNRNPA3/MYL6/FANCI/TNKS1BP1/ACTBL2/PCBP2/MRPS17/ACTG1/RUFY1/BRK1/MYH9
PLEKHM3	0.891116	1.36743	0.0188998	1590	tags=11%, list=3%, signal=10%	GTF2I/CNOT1/NCKAP1/NDUFS1/NSUN2/EPAS1/MYH9/CYFIP1/TLN1
IMMP1L	0.841085	1.36741	0.015189	2262	tags=15%, list=4%, signal=15%	SAFB2/AAAS/PCBP2/SMPD4/HNRNPM/SART3/ABI2/FANCI/NDUFA11/RAC1/CHCHD3/HNRNPU/ACTA1
CFAP126	0.90203	1.36741	0.0059924	2813	tags=20%, list=5%, signal=19%	GTF2I/CNOT1/NDUFS1/CYFIP1/NCKAP1/EPAS1/ACTN4/CD2AP/DHX9/NDUFS2/MYH9/NDUFA10/CHCHD3/STRAP/MYH10/SLC7A11/TARDBP
FAT1	0.841549	1.36741	0.0120266	3787	tags=20%, list=7%, signal=19%	CNOT1/NDUFS1/GTF2I/CYFIP1/MYH9/TLN1/MYL6/NDUFA11/DHX9/SLC2A1/BRK1/PDLIM1/RNH1/IPO7/PPM1F/ZHX2/GYS1
DDX54	0.8984	1.3674	0.00789849	2304	tags=21%, list=4%, signal=21%	GCN1/SART3/AAAS/DHX9/SMPD4/HNRNPM/ACTN4/HNRNPU/STRAP/CNOT1/HNRNPH1/PDLIM1/CHCHD3/BRK1/RRP1/WASF2/IQGAP1/PCBP2
MCMBP	0.926467	1.36736	0.00421113	1637	tags=20%, list=3%, signal=20%	DHX9/SART3/NCKAP1/HNRNPU/CYFIP1/RPA1/HNRNPA3/SMPD4/IPO7/HNRNPM/IQGAP1/SLC3A2/MYH9/CAPZB/LRPPRC/SAFB2/ACTA2
PLRG1	0.84998	1.36731	0.0303566	1240	tags=15%, list=2%, signal=15%	DHX9/TARDBP/HNRNPU/SLC7A11/NDUFC1/CYFIP1/PRDX1/OXSM/SLC3A2/SQSTM1/TLN1/RAC1/MYH10
AC107871.2	0.77629	1.36721	0.0363552	5389	tags=25%, list=10%, signal=23%	ACTB/PPM1F/NUBPL/SLC2A1/NDUFS1/ACTN4/EPAS1/CHCHD3/ACTG1/MYL6/ACTA2/TRIP6/PRDX1/SQSTM1/PML/ACTA1/HNRNPH1/GTF2I/RUFY1/RPN1/RNH1
AL592166.1	0.825979	1.36709	0.0279668	2808	tags=11%, list=5%, signal=10%	PCBP2/RPN1/ANP32E/TARDBP/MYH10/IPO4/WASF2/TRIP6/PRDX1
WASHC2A	0.836875	1.36698	0.0231693	3482	tags=21%, list=6%, signal=20%	DHX9/GCN1/SQSTM1/LRPPRC/IPO7/RUFY1/HNRNPU/NCKAP1/BRK1/PRDX1/SART3/NLN/WASF2/MRPS17/RNH1/SLC7A11/RAC1/ACTA1
SMARCB1	0.903824	1.36695	0.00562791	1844	tags=27%, list=3%, signal=27%	HNRNPU/HNRNPM/ATXN10/ABI2/SART3/AAAS/PCBP2/SMPD4/DBN1/HNRNPA3/RAC1/DHX9/SAFB2/TLN1/INF2/CYFIP1/PPM1F/TNKS1BP1/CAPZB/SAMM50/SLC2A3/GCN1/GYS1
GPR108	0.822712	1.36694	0.0436836	2592	tags=19%, list=5%, signal=18%	HNRNPM/SAFB2/UBASH3B/RPA1/ATXN10/RUFY1/SQSTM1/LRPPRC/INF2/RPN1/BOP1/DSTN/SLC3A2/DHX9/GTF2I/NDUFS2
PCID2	0.872538	1.36691	0.0287138	2481	tags=27%, list=5%, signal=26%	HNRNPH1/ABI2/SART3/ANP32E/GCN1/HNRNPU/SMPD4/RPA1/IPO7/NDUFS2/DHX9/ACTG1/RRP1/LRPPRC/MYH10/HNRNPM/CAPZB/RNH1/HNRNPA3/TARDBP/TRIP6/NLN/SAFB2
ACO2	0.895996	1.36684	0.0225348	1801	tags=20%, list=3%, signal=20%	CYFIP1/NDUFS1/CNOT1/GTF2I/NCKAP1/MYH9/TLN1/SMPD4/NDUFA11/NDUFA10/CHCHD3/FLNA/SAMM50/ATXN10/IQGAP1/OXSM/STRAP
FAM219A	0.888093	1.36681	0.00491638	1334	tags=20%, list=2%, signal=20%	TLN1/SMPD4/ACTN4/PML/WASF2/MYH9/CNOT1/FANCI/NCKAP1/DSTN/IQGAP1/ACTB/CAPZB/DHX9/SLC2A1/ZHX2/ABI2
ECHS1	0.791686	1.36677	0.0240064	4290	tags=23%, list=8%, signal=21%	UBASH3B/SLC2A1/HNRNPA3/IQGAP1/GTF2I/MYL6/DSTN/TRIP6/OXSM/PDLIM1/EPAS1/FANCI/NDUFA10/NLN/FLNB/CNOT1/NDUFS2/NCKAP1/RRP1
MCAT	0.815877	1.36676	0.032319	2944	tags=23%, list=5%, signal=21%	SAMM50/NDUFA10/RRP1/DBN1/OXSM/BOP1/PPM1F/BRK1/ATXN10/IPO4/DSTN/MYH9/RNH1/GYS1/NDUFC1/ARMC6/GTF2I/FLNB/MRPS17
NUP88	0.841317	1.36674	0.0406699	1811	tags=14%, list=3%, signal=14%	RPA1/MYH10/HNRNPU/IPO7/GTF2I/DHX9/ABI2/SMPD4/SART3/SLC3A2/PRDX1/LRPPRC
TCF3P1	0.89769	1.36673	0.0150487	923	tags=5%, list=2%, signal=5%	SART3/HNRNPH1/ANP32E/IPO7
AC091057.1	0.94554	1.3667	0.00195241	1174	tags=19%, list=2%, signal=19%	HNRNPA3/FANCI/PRC1/HNRNPM/HNRNPH1/DHX9/SMPD4/ABI2/ANP32E/HNRNPU/SART3/RPA1/NDUFS2/GYS1/GCN1/CHD4
YEATS4	0.907836	1.36668	0.00783323	2191	tags=29%, list=4%, signal=27%	HNRNPM/DHX9/SART3/IPO7/PCBP2/CD2AP/RPA1/AAAS/HNRNPA3/HNRNPU/LRPPRC/FANCI/CYFIP1/SMPD4/SPART/ZHX2/SLC3A2/CNOT1/CAPZB/ABI2/SAFB2/NUBPL/MYL6/SAMM50
ACAD9	0.850949	1.36658	0.0110662	2312	tags=29%, list=4%, signal=27%	SART3/HNRNPM/RPA1/NDUFS2/NDUFA10/GCN1/NCKAP1/CHCHD3/ATXN10/TNKS1BP1/SMPD4/NDUFS1/BRK1/AAAS/NUBPL/RPN1/ACTG2/ACTB/DHX9/WASF2/HNRNPH1/CYFIP1/ACTA1/FLNB
NOL7	0.882981	1.36655	0.0294785	425	tags=8%, list=1%, signal=8%	CD2AP/HNRNPA3/TARDBP/PCBP2/HNRNPM/HNRNPU/FANCI
EDEM2	0.814672	1.36647	0.0311626	2370	tags=15%, list=4%, signal=15%	RPN1/HNRNPM/MYL6/HNRNPA3/SAFB2/TARDBP/TRIP6/ATXN10/STRAP/RNH1/FLNA/WASF2/SMPD4
MCFD2	0.853637	1.36645	0.0148553	2834	tags=18%, list=5%, signal=17%	CNOT1/GTF2I/NCKAP1/TLN1/GCN1/LRPPRC/NDUFS2/NDUFS1/CHCHD3/STRAP/HNRNPU/ZHX2/CHD4/OXSM/ARMC6
CDC16	0.827327	1.36644	0.0423412	3392	tags=20%, list=6%, signal=19%	RPA1/RUFY1/LRPPRC/HNRNPA3/SAFB2/CD2AP/DHX9/SLC3A2/CAPZB/GCN1/ACTG2/CHCHD3/NUBPL/HNRNPM/ATXN10/ACTN4/CNOT1
AAMP	0.884138	1.36636	0.0101132	2318	tags=27%, list=4%, signal=26%	AAAS/ACTA2/SART3/HNRNPM/ACTB/BRK1/RPA1/SMPD4/DHX9/NDUFA10/HNRNPA3/ATXN10/NSUN2/TARDBP/TLN1/LRPPRC/PRDX1/CNOT1/SLC7A11/NCKAP1/SAMM50/MYL6/MYH9
KLF6	0.790719	1.36634	0.0343137	3033	tags=18%, list=6%, signal=17%	CYFIP1/MYH9/NCKAP1/CNOT1/IQGAP1/SLC3A2/NUBPL/MRPS17/ACTB/STRAP/HNRNPA3/NDUFS1/SLC7A11/ACTG1/DHX9
TRPC6	0.833732	1.36629	0.0384139	2059	tags=11%, list=4%, signal=10%	ACTA2/ACTG2/ACTC1/PPM1F/FLNA/DSTN/EPAS1/RPN1/IPO4
C9orf40	0.822872	1.36628	0.0448889	3278	tags=21%, list=6%, signal=20%	SART3/PCBP2/DHX9/FANCI/AAAS/SAFB2/PPM1F/HNRNPM/RPN1/HNRNPU/FLNA/CHCHD3/ANP32E/SMPD4/IPO4/SLC7A11/SAMM50/SLC2A1
HARS1	0.847465	1.36628	0.0337995	3116	tags=35%, list=6%, signal=33%	SART3/SQSTM1/HNRNPM/HNRNPU/NLN/NSUN2/HNRNPH1/SLC3A2/CHCHD3/WASF2/DHX9/RNH1/ZHX2/DBN1/SLC7A11/AAAS/NDUFS1/NDUFS2/SLC2A1/TNKS1BP1/STRAP/RUFY1/RRP1/BOP1/SAFB2/MYL6/CYFIP1/MYH10/IPO7
WDSUB1	0.879161	1.36621	0.0109574	2509	tags=21%, list=5%, signal=20%	HNRNPU/HNRNPA3/SART3/NCKAP1/SMPD4/LRPPRC/RPA1/FANCI/WASF2/SAFB2/ABI2/DHX9/AAAS/TRIP6/ARMC6/INF2/PML/TLN1
RHBDD1	0.834044	1.36621	0.0158727	3715	tags=20%, list=7%, signal=19%	GTF2I/CNOT1/NDUFS1/MYH9/SLC3A2/NCKAP1/SART3/RPN1/NDUFA10/BOP1/TRIP6/PRC1/NLN/DHX9/RPA1/NDUFC1/SLC2A1
MYADM	0.84521	1.36619	0.0216943	2331	tags=20%, list=4%, signal=19%	IQGAP1/DBN1/HNRNPA3/RPA1/SMPD4/ACTG1/HNRNPM/ABI2/MYH9/CHCHD3/TNKS1BP1/ZHX2/ACTA2/SPART/SLC2A3/ATXN10/SAFB2
DDX51	0.827165	1.36616	0.031653	1662	tags=17%, list=3%, signal=16%	AAAS/GCN1/SART3/TARDBP/PCBP2/CYFIP1/SMPD4/HNRNPH1/SLC3A2/HNRNPU/CNOT1/RRP1/HNRNPM/IQGAP1
CHMP5	0.867451	1.36608	0.0129914	1829	tags=20%, list=3%, signal=20%	TLN1/SART3/CYFIP1/CNOT1/IQGAP1/NCKAP1/IPO7/WASF2/NUBPL/CHCHD3/ACTA2/PML/ZHX2/UBASH3B/NDUFA11/ANP32E/HNRNPM
DNPEP	0.838838	1.36607	0.0219646	2282	tags=18%, list=4%, signal=17%	NDUFA10/RNH1/RPA1/BRK1/RUFY1/GTF2I/HNRNPA3/MYL6/MRPS17/SAFB2/FANCI/ABI2/DBN1/ACTB/SAMM50
H2AC13	0.834852	1.36605	0.0409511	7	tags=1%, list=0%, signal=1%	CNOT1
BAMBI	0.852847	1.36604	0.0135302	3021	tags=29%, list=5%, signal=27%	BOP1/ZHX2/PCBP2/SLC3A2/RAC1/BRK1/INF2/SLC7A11/ATXN10/IPO7/HNRNPU/SAMM50/DSTN/DHX9/SMPD4/PPM1F/HNRNPM/RNH1/RPA1/ABI2/SLC2A3/UBASH3B/EPAS1/SLC2A1
NPEPPSP1	0.87213	1.36604	0.0232495	3195	tags=24%, list=6%, signal=22%	DHX9/SMPD4/NCKAP1/CNOT1/GTF2I/ACTN4/CD2AP/SAFB2/SLC3A2/ZHX2/SART3/NDUFA10/GCN1/NSUN2/HNRNPH1/PPM1F/PML/SAMM50/PRC1/SLC7A11
DCP1B	0.800523	1.36601	0.0327456	3243	tags=21%, list=6%, signal=20%	RPA1/SART3/IPO7/DHX9/HNRNPH1/STRAP/MYH10/GYS1/HNRNPM/AAAS/SMPD4/BOP1/IPO4/SLC3A2/RUFY1/FLNB/PPM1F/ACTG1
CLPTM1	0.83248	1.366	0.0366748	1905	tags=19%, list=3%, signal=18%	ACTN4/SMPD4/RPN1/GTF2I/SAFB2/MYH9/OXSM/ATXN10/SAMM50/ACTG2/HNRNPM/PDLIM1/NCKAP1/TNKS1BP1/NDUFS2/ANP32E
WDR55	0.846896	1.36596	0.0295791	2132	tags=20%, list=4%, signal=19%	DHX9/CYFIP1/NSUN2/NLN/HNRNPH1/WASF2/IPO7/SQSTM1/MYH9/SART3/RUFY1/SMPD4/BOP1/HNRNPU/RPA1/SLC3A2/NDUFA11
LARP1	0.901945	1.36595	0.0104944	1711	tags=20%, list=3%, signal=20%	DHX9/IPO7/LRPPRC/NCKAP1/GCN1/RUFY1/HNRNPU/SMPD4/CD2AP/NLN/NSUN2/GTF2I/SART3/WASF2/SLC3A2/GYS1/PCBP2
PLEKHG7	0.825351	1.36576	0.0208816	3934	tags=19%, list=7%, signal=18%	CNOT1/FLNB/GCN1/HNRNPU/MRPS17/GTF2I/ARMC6/NDUFS2/NDUFA11/SLC3A2/DHX9/ACTG2/SPART/TRIP6/OXSM/SMPD4
ZBTB12	0.921098	1.36573	0.00655134	2033	tags=21%, list=4%, signal=21%	HNRNPU/SMPD4/FANCI/HNRNPA3/HNRNPH1/RPA1/SART3/SAFB2/DHX9/PCBP2/AAAS/ABI2/HNRNPM/CYFIP1/IPO7/CHD4/ACTN4/ANP32E
AP001033.1	0.938576	1.36568	0.00690297	1083	tags=8%, list=2%, signal=8%	AAAS/SLC3A2/RNH1/HNRNPM/NLN/UBASH3B/FLNA
LRCH1	0.887797	1.36559	0.0107449	1735	tags=13%, list=3%, signal=13%	GTF2I/CYFIP1/CNOT1/CD2AP/ACTB/IQGAP1/MYH9/FLNA/SLC3A2/ZHX2/EPAS1
AL133215.3	0.762873	1.36556	0.0315961	5160	tags=20%, list=9%, signal=18%	SQSTM1/SLC7A11/NCKAP1/CNOT1/CHCHD3/GYS1/ZHX2/PRDX1/TLN1/NLN/STRAP/TNKS1BP1/DSTN/SAMM50/DHX9/NDUFA11/SMPD4
VPS13B-DT	0.824251	1.36535	0.0338542	3148	tags=15%, list=6%, signal=15%	BOP1/EPAS1/ZHX2/PRDX1/TNKS1BP1/NDUFS2/NDUFC1/SPART/ACTC1/INF2/PDLIM1/MYH10/NUBPL
TMEM237	0.914933	1.36533	0.00524821	1539	tags=15%, list=3%, signal=15%	HNRNPA3/ABI2/SMPD4/HNRNPH1/FANCI/TARDBP/HNRNPU/PCBP2/RPN1/FLNA/HNRNPM/AAAS/BRK1
NPM1P9	0.875487	1.36532	0.0111526	1187	tags=15%, list=2%, signal=15%	TARDBP/GYS1/FANCI/PCBP2/HNRNPA3/HNRNPM/STRAP/PRC1/HNRNPU/EPAS1/HNRNPH1/AAAS/NSUN2
ADCK2	0.817734	1.36532	0.0361186	3166	tags=26%, list=6%, signal=25%	AAAS/GCN1/HNRNPM/ATXN10/FANCI/SMPD4/DHX9/GTF2I/SART3/RRP1/RNH1/RPA1/ACTA1/TRIP6/ACTB/IPO4/SAFB2/ACTN4/HNRNPA3/NUBPL/OXSM/HNRNPH1
MYL6	0.852636	1.36528	0.0189643	4252	tags=34%, list=8%, signal=31%	TARDBP/HNRNPM/BRK1/PCBP2/NDUFA11/IPO7/RAC1/CHD4/PRC1/RRP1/ACTG2/NDUFS1/IPO4/SART3/FANCI/NDUFC1/PPM1F/DHX9/FLNA/TRIP6/ATXN10/HNRNPU/CAPZB/RNH1/SLC2A1/BOP1/ACTA1/SAFB2
NPIPB4	0.828024	1.36509	0.0377822	2695	tags=19%, list=5%, signal=18%	HNRNPH1/SAFB2/FLNA/SMPD4/CYFIP1/TLN1/MRPS17/PCBP2/FLNB/LRPPRC/CD2AP/IPO7/NDUFC1/PRDX1/ACTG1/PDLIM1
AC090617.5	0.746238	1.365	0.042735	5406	tags=30%, list=10%, signal=27%	MYH10/ABI2/UBASH3B/CHD4/ACTG1/RPA1/CHCHD3/PDLIM1/NLN/NDUFS2/CYFIP1/ACTG2/IPO7/TNKS1BP1/PRDX1/SAFB2/NUBPL/RNH1/ACTB/AAAS/MYL6/INF2/NSUN2/CNOT1/WASF2
ZNF74	0.881786	1.365	0.00612661	953	tags=13%, list=2%, signal=13%	SMPD4/ATXN10/HNRNPM/HNRNPU/PPM1F/IPO7/SAMM50/PDLIM1/RPA1/CYFIP1/GCN1
UNK	0.896683	1.36499	0.0165955	2532	tags=20%, list=5%, signal=19%	SART3/HNRNPA3/FANCI/SMPD4/ACTN4/PRC1/HNRNPU/SAFB2/RPA1/CD2AP/AAAS/GTF2I/OXSM/ABI2/ACTG1/HNRNPH1/ACTC1
CTNNA1	0.872603	1.36498	0.0182696	2540	tags=24%, list=5%, signal=23%	HNRNPU/CYFIP1/NCKAP1/RUFY1/IPO7/SART3/CD2AP/SQSTM1/DHX9/NDUFS1/NLN/ACTN4/PRDX1/SAFB2/NDUFA10/TLN1/HNRNPM/SLC7A11/GCN1/SPART
CLK2	0.915164	1.36497	0.00976062	1314	tags=13%, list=2%, signal=13%	HNRNPU/ANP32E/HNRNPA3/SMPD4/HNRNPH1/SART3/DHX9/RPA1/HNRNPM/SAFB2/ACTG1
LRRC59	0.88515	1.36496	0.013013	2050	tags=20%, list=4%, signal=20%	SMPD4/FANCI/DHX9/HNRNPM/NSUN2/IPO7/RPN1/TLN1/CHCHD3/STRAP/ACTN4/CNOT1/ACTB/SPART/IQGAP1/PRDX1/HNRNPH1
ACP6	0.836187	1.36492	0.0339181	1454	tags=14%, list=3%, signal=14%	HNRNPU/BOP1/RRP1/ANP32E/ATXN10/TARDBP/NDUFS2/NUBPL/SLC7A11/SAMM50/ACTA2/SLC2A3
MAML3	0.83207	1.36484	0.0189741	3711	tags=20%, list=7%, signal=19%	CYFIP1/CNOT1/SLC7A11/PDLIM1/SPART/LRPPRC/NUBPL/MYH9/NDUFA10/ZHX2/HNRNPH1/SAFB2/CHCHD3/PML/RPN1/PRDX1/STRAP
TRAFD1	0.906715	1.36478	0.00146752	1871	tags=19%, list=3%, signal=18%	SART3/GCN1/HNRNPU/FANCI/DHX9/RPA1/HNRNPM/HNRNPA3/PML/TNKS1BP1/STRAP/HNRNPH1/GYS1/IQGAP1/SPART/FLNA
PCBP2P2	0.916007	1.36475	0.00756496	1259	tags=14%, list=2%, signal=14%	CNOT1/GTF2I/DHX9/GCN1/IPO7/ACTN4/HNRNPM/LRPPRC/FLNB/NDUFA10/PCBP2/PML
WEE1	0.857971	1.36473	0.00927469	2251	tags=18%, list=4%, signal=17%	IPO7/HNRNPA3/HNRNPH1/ABI2/SART3/CD2AP/SMPD4/HNRNPU/ACTB/FLNB/DSTN/HNRNPM/NDUFA10/BRK1/MYH9
MAP4K4	0.869743	1.36472	0.0175405	1137	tags=13%, list=2%, signal=13%	HNRNPU/SART3/RPA1/SMPD4/ACTN4/HNRNPM/HNRNPA3/MYH9/DHX9/FLNB/RPN1
OBI1	0.857574	1.3647	0.02906	1534	tags=15%, list=3%, signal=15%	HNRNPA3/SART3/SMPD4/IPO4/ABI2/TARDBP/HNRNPM/WASF2/PML/RAC1/DHX9/SLC2A1/RUFY1
GPN2	0.847541	1.36469	0.0332147	2867	tags=20%, list=5%, signal=19%	WASF2/CAPZB/SART3/HNRNPU/CD2AP/SAFB2/GYS1/MRPS17/NDUFA10/RAC1/TRIP6/PCBP2/ANP32E/FLNA/BRK1/ACTC1/ACTN4
TRIOBP	0.878716	1.36465	0.00707101	3339	tags=24%, list=6%, signal=22%	ABI2/SMPD4/RUFY1/MYH9/ATXN10/AAAS/RPA1/WASF2/PPM1F/FLNB/NSUN2/PRDX1/DHX9/NCKAP1/RAC1/NLN/INF2/TARDBP/PDLIM1/LRPPRC
ZNF335	0.920887	1.36464	0.00400753	1042	tags=15%, list=2%, signal=15%	SART3/HNRNPU/HNRNPA3/SMPD4/SAFB2/GCN1/CD2AP/GYS1/AAAS/HNRNPH1/ACTB/WASF2/TLN1
LYAR	0.848137	1.36462	0.0311419	1643	tags=19%, list=3%, signal=19%	HNRNPA3/TARDBP/AAAS/PCBP2/RPA1/HNRNPU/OXSM/HNRNPM/ACTB/SLC3A2/STRAP/IPO4/BOP1/CAPZB/PRDX1/DHX9
CTSD	0.77591	1.36447	0.0350438	1329	tags=8%, list=2%, signal=8%	INF2/TRIP6/NDUFS2/RNH1/RRP1/RUFY1/SQSTM1
HNRNPA3P6	0.880433	1.36446	0.0087159	1781	tags=17%, list=3%, signal=16%	HNRNPA3/NCKAP1/DHX9/ANP32E/HNRNPM/HNRNPU/SMPD4/SART3/IPO7/RPA1/CD2AP/NSUN2/CNOT1/STRAP
STT3A	0.85446	1.36445	0.0272578	3148	tags=21%, list=6%, signal=20%	ATXN10/HNRNPM/SART3/SMPD4/CYFIP1/RPN1/ANP32E/DBN1/NDUFS2/CD2AP/GTF2I/RNH1/TARDBP/IPO4/CAPZB/SLC7A11/HNRNPU/ABI2
AC020917.2	0.854982	1.36437	0.0284889	3491	tags=18%, list=6%, signal=17%	GYS1/PRC1/TARDBP/CYFIP1/RNH1/SART3/LRPPRC/NUBPL/CHCHD3/CD2AP/IQGAP1/PRDX1/ACTA1/ABI2/FLNB
PTMAP10	0.757104	1.36434	0.0461783	6611	tags=30%, list=12%, signal=26%	SMPD4/FANCI/HNRNPA3/ABI2/CAPZB/RNH1/DSTN/NDUFA10/MYL6/SQSTM1/PPM1F/AAAS/TNKS1BP1/ACTG2/EPAS1/MYH10/DBN1/FLNB/RAC1/NDUFA11/PCBP2/NDUFS1/DHX9/NDUFS2/ACTA1
PPAT	0.890568	1.36431	0.0100337	2004	tags=20%, list=4%, signal=20%	SART3/LRPPRC/DHX9/NCKAP1/HNRNPM/IPO7/FANCI/SMPD4/HNRNPU/GCN1/NDUFA10/BRK1/SLC2A1/HNRNPH1/TRIP6/AAAS/PRC1
ING3	0.898467	1.36429	0.00920792	1910	tags=21%, list=3%, signal=21%	HNRNPH1/DHX9/ABI2/CYFIP1/GTF2I/IPO7/CHCHD3/EPAS1/CNOT1/SMPD4/SAFB2/NDUFS1/SART3/PML/RPN1/ACTB/DSTN/ATXN10
RPL7AP22	0.924742	1.36421	0.00401913	1900	tags=10%, list=3%, signal=9%	UBASH3B/ABI2/INF2/DSTN/CYFIP1/GYS1/NDUFS1/TARDBP
PEA15	0.883205	1.36418	0.0105674	1897	tags=24%, list=3%, signal=23%	HNRNPU/DSTN/DBN1/HNRNPM/PPM1F/ACTB/DHX9/NCKAP1/PML/MYH9/HNRNPH1/TLN1/ANP32E/FLNB/CD2AP/SMPD4/ACTN4/WASF2/NDUFS2/LRPPRC
MARCHF7	0.924025	1.36403	0.01698	1146	tags=14%, list=2%, signal=14%	NCKAP1/DHX9/CD2AP/LRPPRC/HNRNPU/ABI2/HNRNPA3/IPO7/CYFIP1/HNRNPM/SMPD4/IQGAP1
PCDH1	0.762111	1.36397	0.0246367	3971	tags=29%, list=7%, signal=27%	MYH9/RNH1/PRC1/NSUN2/WASF2/SQSTM1/FLNA/RRP1/UBASH3B/ACTN4/CD2AP/FLNB/LRPPRC/PML/CHCHD3/NDUFA11/ACTA2/OXSM/RAC1/PDLIM1/ACTC1/SLC3A2/RPN1/DBN1
STARD7	0.878576	1.36394	0.0136382	3349	tags=31%, list=6%, signal=29%	HNRNPM/LRPPRC/NCKAP1/NDUFA10/RPA1/DHX9/SMPD4/SART3/TARDBP/CYFIP1/CD2AP/GYS1/BRK1/NLN/GCN1/HNRNPU/DBN1/ABI2/CNOT1/EPAS1/ACTG2/HNRNPH1/SAFB2/FANCI/HNRNPA3/NDUFS2
STON2	0.764968	1.36389	0.04811	2821	tags=12%, list=5%, signal=11%	CAPZB/NSUN2/SLC7A11/PRDX1/ZHX2/SQSTM1/PPM1F/OXSM/ACTG2/WASF2
KITLG	0.827964	1.36384	0.0294811	2819	tags=23%, list=5%, signal=21%	NCKAP1/DHX9/RPA1/SLC2A1/SLC7A11/LRPPRC/MYH10/NDUFS1/SAMM50/AAAS/IQGAP1/HNRNPU/SART3/HNRNPM/SPART/ZHX2/ANP32E/SMPD4/CHD4
AL032821.1	0.879688	1.36382	0.0147277	5122	tags=24%, list=9%, signal=22%	SMPD4/IQGAP1/FLNB/UBASH3B/ACTB/PDLIM1/SART3/NUBPL/HNRNPH1/ACTA1/NSUN2/NLN/FANCI/MYH9/SLC2A1/IPO4/SLC3A2/BRK1/SLC7A11/GYS1
PABPC1P4	0.807314	1.3637	0.0391697	2330	tags=15%, list=4%, signal=15%	DHX9/WASF2/CHD4/EPAS1/LRPPRC/PRDX1/NDUFS2/HNRNPM/FLNB/ARMC6/CYFIP1/PPM1F/OXSM
AC127002.2	0.800455	1.36369	0.0207365	2591	tags=13%, list=5%, signal=12%	UBASH3B/GTF2I/RPA1/MYH9/PCBP2/NDUFS1/ZHX2/NDUFA10/SAFB2/NDUFS2/RUFY1
TCHP	0.883597	1.36352	0.00865982	2145	tags=19%, list=4%, signal=18%	SART3/GCN1/DHX9/NSUN2/HNRNPU/HNRNPH1/RUFY1/AAAS/RPA1/SAMM50/MYL6/WASF2/ACTN4/MYH10/BRK1/PRC1
ZNF232	0.852275	1.36346	0.0140366	1686	tags=13%, list=3%, signal=13%	HNRNPM/HNRNPU/SAFB2/RPA1/AAAS/TARDBP/MYL6/LRPPRC/SMPD4/GYS1/CHCHD3
MSTO2P	0.889946	1.36344	0.0228567	1891	tags=14%, list=3%, signal=14%	HNRNPH1/HNRNPU/HNRNPA3/HNRNPM/SMPD4/NUBPL/SART3/NSUN2/RPA1/CD2AP/NDUFA11/GYS1
DCAF15	0.898124	1.36332	0.0128829	1291	tags=18%, list=2%, signal=17%	SAFB2/SART3/AAAS/HNRNPU/SMPD4/HNRNPM/HNRNPH1/DHX9/ANP32E/NDUFA11/ACTN4/WASF2/HNRNPA3/TRIP6/MYL6
AL356056.2	0.894863	1.36332	0.00759849	2317	tags=17%, list=4%, signal=16%	DHX9/GCN1/IPO7/NUBPL/SMPD4/CNOT1/ACTA1/NCKAP1/ZHX2/PPM1F/TNKS1BP1/IPO4/NDUFA10/INF2
IPO9	0.926787	1.36319	0.00181459	1890	tags=23%, list=3%, signal=22%	DHX9/HNRNPU/SART3/SMPD4/RPA1/FANCI/HNRNPA3/LRPPRC/ATXN10/IPO7/HNRNPH1/GCN1/ACTN4/ANP32E/PRC1/NCKAP1/ARMC6/CYFIP1/EPAS1
CLCN2	0.867441	1.36318	0.0111103	3150	tags=25%, list=6%, signal=24%	SART3/DHX9/SMPD4/ACTN4/CYFIP1/HNRNPM/FANCI/HNRNPU/NSUN2/GYS1/GTF2I/CNOT1/MYH9/AAAS/TRIP6/LRPPRC/BOP1/GCN1/PRC1/SLC2A1/TARDBP
HNRNPM	0.930643	1.36317	0.00256181	806	tags=23%, list=1%, signal=23%	SART3/DHX9/RPA1/HNRNPA3/HNRNPU/FANCI/AAAS/TARDBP/SAFB2/ACTN4/SMPD4/RPN1/SPART/ATXN10/FLNA/MYL6/GCN1/GYS1/NDUFA10
AP003733.3	0.794736	1.36316	0.023808	2077	tags=11%, list=4%, signal=10%	AAAS/HNRNPU/LRPPRC/PCBP2/TARDBP/HNRNPH1/ANP32E/IPO4/MYH9
AL356968.2	0.82208	1.36316	0.0328867	1916	tags=14%, list=3%, signal=14%	GTF2I/CNOT1/FLNB/RRP1/RAC1/MYH9/CD2AP/CHD4/IPO7/NUBPL/NDUFS1/PPM1F
CAP1P2	0.854878	1.36309	0.0166332	2752	tags=20%, list=5%, signal=19%	IPO7/TLN1/GTF2I/PML/MYH10/GYS1/CNOT1/RRP1/SART3/NCKAP1/CAPZB/SLC2A1/ACTC1/CHD4/NSUN2/FLNB/EPAS1
ATP5F1E	0.902446	1.36306	0.00709892	2402	tags=17%, list=4%, signal=16%	CHD4/MYL6/GTF2I/ZHX2/BRK1/CNOT1/NDUFA11/RPN1/GCN1/RRP1/NDUFS2/CAPZB/ACTG1/RAC1
AC084824.5	0.794449	1.36304	0.0318471	3472	tags=15%, list=6%, signal=15%	CHD4/MYL6/ACTA1/NCKAP1/STRAP/NDUFC1/MRPS17/RNH1/RAC1/SART3/SLC2A1/SQSTM1/PRC1
ELP4	0.848447	1.36301	0.0306243	1866	tags=17%, list=3%, signal=16%	AAAS/HNRNPA3/HNRNPM/ANP32E/IPO7/HNRNPU/HNRNPH1/DHX9/PCBP2/TARDBP/NUBPL/PRC1/FANCI/BRK1
POLR3A	0.876841	1.36295	0.0195146	2404	tags=20%, list=4%, signal=19%	SART3/SMPD4/LRPPRC/GCN1/RPA1/HNRNPM/HNRNPA3/DHX9/HNRNPU/PDLIM1/AAAS/PPM1F/EPAS1/BOP1/FLNB/IPO7/MRPS17
ZNF343	0.8791	1.36294	0.0150287	2981	tags=25%, list=5%, signal=24%	DHX9/SMPD4/RPA1/CD2AP/PCBP2/HNRNPH1/TARDBP/ZHX2/IPO7/LRPPRC/GTF2I/RRP1/PDLIM1/HNRNPU/RNH1/BOP1/PRC1/DSTN/RPN1/SAFB2/SLC2A3
DAGLB	0.810043	1.36288	0.0437956	1366	tags=17%, list=2%, signal=16%	RAC1/GYS1/RRP1/DSTN/MYH10/CHCHD3/ACTB/MYH9/SAFB2/PCBP2/BRK1/RNH1/MRPS17/OXSM
MFSD4B	0.830098	1.3628	0.0433213	2922	tags=21%, list=5%, signal=20%	TARDBP/HNRNPA3/ABI2/RPA1/HNRNPH1/SART3/LRPPRC/ACTB/SQSTM1/SMPD4/CHD4/TRIP6/GCN1/NCKAP1/CHCHD3/PRC1/FANCI/HNRNPU
RN7SL574P	0.786614	1.3628	0.0356201	3553	tags=15%, list=6%, signal=15%	HNRNPH1/NSUN2/SMPD4/SART3/PML/SLC2A3/NCKAP1/NDUFC1/NDUFS2/AAAS/RPA1/SAFB2/ZHX2
CYB561D1	0.856352	1.36274	0.0401741	2300	tags=13%, list=4%, signal=13%	WASF2/PPM1F/GCN1/HNRNPU/MRPS17/DBN1/NCKAP1/ARMC6/NLN/HNRNPM/AAAS
AC007040.2	0.962823	1.36274	0.0131946	125	tags=2%, list=0%, signal=2%	BRK1/CHD4
TCP11	0.863165	1.3627	0.0237034	2064	tags=7%, list=4%, signal=7%	NCKAP1/ACTB/SAMM50/GTF2I/FLNB/ANP32E
RPA2	0.855441	1.3626	0.0329545	4543	tags=38%, list=8%, signal=35%	CAPZB/PCBP2/TARDBP/SART3/BRK1/SMPD4/RPA1/WASF2/OXSM/HNRNPU/SLC2A1/CHCHD3/DHX9/EPAS1/FANCI/PRDX1/PRC1/AAAS/ACTG2/PML/RPN1/TRIP6/ZHX2/SLC7A11/FLNB/ANP32E/TNKS1BP1/IPO7/INF2/ACTA1/ACTC1/GYS1
OPLAH	0.834387	1.36258	0.0389117	4106	tags=27%, list=7%, signal=25%	MYH9/RNH1/CYFIP1/SQSTM1/CHD4/NDUFS2/BOP1/CNOT1/NCKAP1/RPN1/FLNA/SMPD4/EPAS1/ACTG1/TLN1/FLNB/TARDBP/NLN/GCN1/ARMC6/HNRNPU/SLC7A11/WASF2
BRAP	0.900149	1.36247	0.00577311	1018	tags=14%, list=2%, signal=14%	SART3/HNRNPU/SMPD4/RPA1/GCN1/AAAS/HNRNPA3/PCBP2/CHCHD3/PPM1F/PRC1/CHD4
AC079210.1	0.778989	1.36243	0.0478088	2866	tags=11%, list=5%, signal=10%	NDUFS1/NDUFA11/ACTA1/BOP1/PRDX1/WASF2/BRK1/ACTB/SLC2A1
PRKAG1	0.904343	1.36242	0.00195188	2345	tags=31%, list=4%, signal=30%	DHX9/PCBP2/CHCHD3/HNRNPU/AAAS/RPA1/STRAP/HNRNPM/SART3/CD2AP/NSUN2/CAPZB/ATXN10/RNH1/OXSM/TARDBP/PRDX1/GCN1/GYS1/RUFY1/MYL6/ACTG1/SLC2A1/RAC1/SAMM50/SMPD4
AL591167.1	0.877368	1.36238	0.0398162	265	tags=4%, list=0%, signal=4%	CD2AP/NCKAP1/MYL6
KIZ-AS1	0.88349	1.3623	0.0224007	1869	tags=11%, list=3%, signal=10%	DHX9/AAAS/SMPD4/HNRNPA3/SAFB2/CYFIP1/NSUN2/MYL6/RAC1
TUSC2	0.844461	1.3623	0.0355097	2151	tags=13%, list=4%, signal=13%	BRK1/TARDBP/RRP1/CHD4/PCBP2/DBN1/SAMM50/TLN1/BOP1/SPART/TRIP6
SEMA6D	0.889832	1.36229	0.012758	883	tags=6%, list=2%, signal=6%	IQGAP1/FLNA/ACTA2/EPAS1/CHD4
ZNF2	0.888678	1.36226	0.0084483	1629	tags=15%, list=3%, signal=15%	SMPD4/DHX9/HNRNPA3/HNRNPH1/IPO7/AAAS/PML/HNRNPU/ACTN4/ABI2/RPN1/SPART/RPA1
CD59	0.831769	1.36224	0.0284627	2487	tags=14%, list=5%, signal=14%	IQGAP1/PML/RAC1/FLNA/ACTG2/UBASH3B/WASF2/ACTG1/PDLIM1/NDUFS2/ABI2/NUBPL
COA1	0.87976	1.3622	0.00551532	1769	tags=18%, list=3%, signal=17%	GYS1/FANCI/ABI2/DHX9/SART3/HNRNPA3/SAFB2/SMPD4/HNRNPU/STRAP/DSTN/TRIP6/FLNA/LRPPRC/RUFY1
PLIN3	0.899373	1.3622	0.00726305	1932	tags=21%, list=4%, signal=21%	HNRNPM/CNOT1/IQGAP1/WASF2/CYFIP1/TLN1/DHX9/SAFB2/SART3/ACTN4/GYS1/RAC1/FLNA/EPAS1/NDUFS1/IPO7/PML/NDUFA10
NDUFA10	0.796625	1.3622	0.040201	3112	tags=20%, list=6%, signal=19%	NDUFS2/SAMM50/NCKAP1/OXSM/HNRNPM/NDUFS1/SMPD4/BRK1/TRIP6/SART3/PPM1F/PCBP2/AAAS/NUBPL/ZHX2/PRDX1/STRAP
AC131944.1	0.875308	1.36217	0.0307046	1162	tags=8%, list=2%, signal=8%	SQSTM1/NLN/SLC2A1/EPAS1/PML/SAMM50/SAFB2
KCNMB1	0.91174	1.36217	0.0167926	629	tags=10%, list=1%, signal=9%	ACTA2/IQGAP1/FLNA/ACTG2/ACTC1/UBASH3B/ACTBL2/PPM1F
PJA1	0.871991	1.36213	0.0113212	1797	tags=21%, list=3%, signal=21%	HNRNPM/FANCI/WASF2/SART3/DSTN/DHX9/SLC2A1/CAPZB/FLNA/NDUFS2/ABI2/NCKAP1/PRDX1/MYL6/NLN/NUBPL/IQGAP1/AAAS
FAM204A	0.840684	1.36207	0.0393975	1590	tags=17%, list=3%, signal=16%	HNRNPU/ABI2/RPA1/SART3/PRC1/DBN1/HNRNPM/PPM1F/CHD4/NDUFS1/IQGAP1/MYL6/NSUN2/RAC1
LINC00551	0.882529	1.36199	0.0172088	2739	tags=20%, list=5%, signal=19%	NDUFA10/HNRNPM/HNRNPA3/CAPZB/MYH10/SPART/UBASH3B/ACTA2/ACTG2/ABI2/LRPPRC/STRAP/AAAS/IQGAP1/MRPS17/TNKS1BP1/TRIP6
CTSC	0.853263	1.36199	0.0186673	1454	tags=19%, list=3%, signal=19%	UBASH3B/RNH1/SLC2A1/CAPZB/PRDX1/WASF2/CYFIP1/IQGAP1/IPO4/DBN1/NDUFS2/STRAP/HNRNPM/GYS1/SLC7A11/CHCHD3
DUSP12	0.884527	1.36199	0.0186695	2487	tags=29%, list=5%, signal=27%	HNRNPU/SMPD4/HNRNPA3/DHX9/HNRNPM/CD2AP/RPA1/TARDBP/AAAS/BRK1/ANP32E/RUFY1/HNRNPH1/ABI2/FANCI/RRP1/NDUFS1/NDUFC1/ATXN10/NDUFA11/DSTN/RNH1/ACTG1/LRPPRC
SUGP1	0.893485	1.36196	0.0183189	2436	tags=23%, list=4%, signal=22%	SAFB2/HNRNPM/TARDBP/RNH1/RRP1/AAAS/PCBP2/SART3/MYL6/SAMM50/DBN1/BRK1/RPA1/HNRNPA3/ACTN4/TLN1/NCKAP1/GYS1/DHX9
AC021945.1	0.835806	1.36195	0.0360481	4354	tags=24%, list=8%, signal=22%	HNRNPH1/HNRNPA3/MYH9/CHD4/RRP1/NSUN2/GYS1/FANCI/DBN1/UBASH3B/HNRNPM/GTF2I/SART3/PRDX1/OXSM/SLC2A3/EPAS1/DSTN/FLNB/NLN
MIR365A	0.999473	1.36194	0.05	30	tags=1%, list=0%, signal=1%	IPO7
RAE1	0.905105	1.36192	0.00238872	1351	tags=20%, list=2%, signal=20%	SART3/TARDBP/HNRNPM/PCBP2/FANCI/HNRNPA3/HNRNPU/GYS1/IPO4/SMPD4/SLC3A2/STRAP/RPA1/AAAS/GCN1/CHD4/SQSTM1
GCNT3	0.859103	1.36186	0.0173182	2902	tags=17%, list=5%, signal=16%	SQSTM1/SLC2A1/WASF2/PRDX1/SLC7A11/NDUFA10/GCN1/NDUFS2/UBASH3B/INF2/NLN/DSTN/FANCI/DHX9
NFYA	0.912176	1.36186	0.00528761	1836	tags=18%, list=3%, signal=17%	SMPD4/CD2AP/HNRNPU/DHX9/HNRNPA3/ATXN10/ANP32E/MYH9/SART3/LRPPRC/NCKAP1/IQGAP1/SAFB2/FANCI/MYL6
FILIP1L	0.896312	1.36184	0.00564036	1178	tags=15%, list=2%, signal=15%	ACTA2/IQGAP1/SLC2A3/NCKAP1/MYH9/TLN1/FLNA/UBASH3B/ACTG1/SPART/CNOT1/SLC7A11/DSTN
PCNPP1	0.791626	1.36183	0.0366162	2192	tags=15%, list=4%, signal=15%	GCN1/AAAS/SART3/IPO7/HNRNPM/EPAS1/HNRNPA3/GYS1/SPART/ZHX2/NCKAP1/IPO4/MYH9
HNRNPA1L2	0.812038	1.36176	0.0459227	3926	tags=21%, list=7%, signal=20%	HNRNPA3/ABI2/HNRNPM/FANCI/CNOT1/HNRNPH1/SLC2A1/MYH10/ACTA2/CAPZB/RPA1/LRPPRC/ARMC6/PPM1F/TARDBP/CHD4/SLC3A2/SLC2A3
KIAA0930	0.856634	1.36174	0.0318544	2418	tags=24%, list=4%, signal=23%	PPM1F/ATXN10/ACTB/TARDBP/RRP1/TRIP6/RAC1/GCN1/DBN1/UBASH3B/BRK1/IPO4/BOP1/RPN1/INF2/ACTG1/NLN/SAMM50/PML/FLNB
MORF4L1	0.901681	1.36172	0.00946171	1975	tags=30%, list=4%, signal=29%	SART3/HNRNPU/HNRNPA3/DHX9/DBN1/ACTN4/FLNA/CD2AP/SMPD4/IPO7/IQGAP1/CYFIP1/PRC1/RPA1/AAAS/FANCI/HNRNPH1/ACTC1/TARDBP/ABI2/CAPZB/PRDX1/NCKAP1/PML/ACTG1
ABL2	0.907166	1.36166	0.00357953	2729	tags=18%, list=5%, signal=17%	DHX9/HNRNPU/ACTN4/GCN1/SART3/SMPD4/CD2AP/ATXN10/PPM1F/WASF2/PCBP2/SAMM50/HNRNPH1/UBASH3B/TLN1
AC092440.1	0.999636	1.36163	0.0122876	21	tags=1%, list=0%, signal=1%	LRPPRC
CPNE2	0.818314	1.36163	0.0227581	2842	tags=21%, list=5%, signal=20%	IQGAP1/UBASH3B/FLNA/NCKAP1/WASF2/GCN1/SPART/GYS1/TLN1/CYFIP1/SQSTM1/NSUN2/STRAP/LRPPRC/BOP1/DBN1/RAC1/ACTC1
DPP9	0.8231	1.36151	0.0240485	2727	tags=21%, list=5%, signal=20%	ACTN4/SAFB2/AAAS/DHX9/GTF2I/SMPD4/HNRNPM/GCN1/GYS1/ACTA1/INF2/MYH9/SLC7A11/ACTB/ANP32E/TNKS1BP1/CHD4/FLNA
NDUFB8	0.893007	1.3615	0.0189612	3706	tags=27%, list=7%, signal=26%	NDUFA11/CNOT1/GTF2I/DHX9/NDUFS1/SQSTM1/EPAS1/IPO4/CHD4/PDLIM1/NDUFC1/MYL6/ANP32E/AAAS/CYFIP1/ATXN10/IPO7/INF2/SAFB2/RAC1/MYH9/CD2AP/SART3
AC004816.1	0.849589	1.36146	0.0226574	2899	tags=23%, list=5%, signal=21%	TARDBP/HNRNPA3/CAPZB/SART3/PRC1/SLC2A1/ACTB/ZHX2/HNRNPM/STRAP/RPN1/PCBP2/RUFY1/FANCI/AAAS/NUBPL/MRPS17/CHD4/RAC1
ZNF526	0.883094	1.36142	0.00916142	1053	tags=19%, list=2%, signal=19%	TARDBP/HNRNPU/HNRNPM/ABI2/SMPD4/GCN1/ACTN4/SAMM50/NCKAP1/SAFB2/DHX9/DBN1/RRP1/WASF2/PPM1F/AAAS
DDX50	0.900488	1.36141	0.00415012	2268	tags=23%, list=4%, signal=22%	HNRNPU/DHX9/HNRNPM/HNRNPA3/RPA1/SMPD4/SART3/ACTG1/LRPPRC/IPO7/FLNA/NDUFS2/ATXN10/MYH10/GCN1/PCBP2/ACTA1/PDLIM1/CYFIP1
EIF6	0.8539	1.36136	0.0293772	2692	tags=18%, list=5%, signal=17%	BRK1/MYL6/RRP1/IPO4/BOP1/PDLIM1/ARMC6/RPN1/ACTA1/SLC3A2/NDUFC1/NDUFA10/ANP32E/DSTN/ACTA2
C5orf15	0.814205	1.36128	0.0352369	2606	tags=21%, list=5%, signal=20%	HNRNPH1/CD2AP/NCKAP1/HNRNPM/TARDBP/NDUFC1/PRC1/HNRNPA3/NSUN2/NUBPL/UBASH3B/SQSTM1/SART3/STRAP/RNH1/IPO7/ACTA1/NDUFA10
NOLC1	0.899493	1.36126	0.00753418	2197	tags=19%, list=4%, signal=18%	IPO7/DHX9/CNOT1/LRPPRC/HNRNPU/HNRNPA3/HNRNPM/NLN/GCN1/RPA1/DBN1/SMPD4/RUFY1/CYFIP1/BOP1/ATXN10
IRF3	0.859079	1.36124	0.0287934	2644	tags=19%, list=5%, signal=18%	BRK1/RRP1/CHD4/GYS1/TARDBP/NCKAP1/NUBPL/PDLIM1/HNRNPA3/NDUFS1/RPN1/BOP1/CHCHD3/SMPD4/GTF2I/SLC7A11
AC026356.2	0.859701	1.36124	0.0212559	3096	tags=19%, list=6%, signal=18%	ABI2/TARDBP/DBN1/AAAS/FANCI/SAFB2/LRPPRC/SMPD4/IPO4/PPM1F/SLC7A11/NSUN2/STRAP/SAMM50/CD2AP/ACTN4
TSPEAR-AS1	0.739173	1.36121	0.0423358	7166	tags=29%, list=13%, signal=25%	WASF2/SAMM50/SAFB2/ABI2/PDLIM1/NLN/HNRNPH1/DSTN/MYL6/PRC1/OXSM/ACTG1/RNH1/RUFY1/TARDBP/ACTG2/GYS1/TRIP6/HNRNPM/SART3/ACTBL2/PPM1F/DBN1/NUBPL
NEURL4	0.882733	1.3612	0.0277469	1515	tags=13%, list=3%, signal=13%	RPA1/DHX9/SMPD4/SART3/GCN1/HNRNPU/CNOT1/IPO7/PML/PPM1F/TLN1
ZWILCH	0.911849	1.36118	0.00912447	1232	tags=14%, list=2%, signal=14%	FANCI/HNRNPA3/HNRNPH1/PRC1/IQGAP1/SMPD4/RPA1/DHX9/SART3/AAAS/PDLIM1/ABI2
METTL1	0.835646	1.36116	0.0425532	2071	tags=21%, list=4%, signal=21%	IPO4/AAAS/ANP32E/TARDBP/RAC1/ACTG1/RRP1/BRK1/HNRNPA3/BOP1/ABI2/OXSM/NDUFA11/CHCHD3/IPO7/MYL6/ACTG2/NDUFC1
SEH1L	0.87618	1.36115	0.00957558	1701	tags=21%, list=3%, signal=21%	HNRNPU/HNRNPA3/SMPD4/DHX9/HNRNPH1/LRPPRC/ZHX2/CD2AP/SART3/NCKAP1/TARDBP/IPO7/ACTG1/ABI2/SLC3A2/STRAP/PCBP2/RNH1
CHTF8	0.864063	1.36114	0.0361638	2773	tags=13%, list=5%, signal=12%	CNOT1/GTF2I/EPAS1/ABI2/TNKS1BP1/GCN1/FLNA/LRPPRC/NSUN2/CHD4/CYFIP1
RNASEH2B	0.825355	1.36099	0.02455	873	tags=15%, list=2%, signal=15%	HNRNPU/HNRNPA3/SART3/DHX9/TARDBP/HNRNPM/RPA1/SAFB2/SMPD4/RAC1/ABI2/RUFY1/NCKAP1
ATP2B1	0.878054	1.36097	0.0124811	2484	tags=24%, list=5%, signal=23%	DHX9/GCN1/HNRNPH1/HNRNPA3/SMPD4/SART3/ABI2/MYH10/NLN/HNRNPU/PRC1/AAAS/BOP1/GYS1/NDUFA11/RPA1/ACTA1/TLN1/STRAP/NDUFS1
KIAA0753	0.916935	1.3609	0.00402039	2229	tags=23%, list=4%, signal=22%	RPA1/SART3/HNRNPM/ABI2/DHX9/MYH10/CD2AP/UBASH3B/DBN1/GYS1/SAFB2/IQGAP1/HNRNPU/ACTG1/INF2/SMPD4/AAAS/SLC7A11/ZHX2
ATP6AP2	0.844575	1.3608	0.0112468	3931	tags=29%, list=7%, signal=27%	IQGAP1/NCKAP1/FLNA/DSTN/CYFIP1/UBASH3B/SMPD4/MYH10/STRAP/TRIP6/ACTB/OXSM/FANCI/PRDX1/ATXN10/DHX9/BRK1/HNRNPH1/PPM1F/RPN1/BOP1/NUBPL/NDUFA10/SLC7A11
RNU6-828P	0.870396	1.36072	0.0384829	3958	tags=15%, list=7%, signal=14%	INF2/PDLIM1/SAMM50/FANCI/CD2AP/CNOT1/GYS1/RRP1/NUBPL/NDUFA11/SMPD4/DBN1/SART3
TMEM127	0.88462	1.36071	0.00546963	1697	tags=20%, list=3%, signal=20%	SMPD4/MYH9/CYFIP1/TNKS1BP1/HNRNPU/IQGAP1/NCKAP1/ACTN4/WASF2/STRAP/CHCHD3/DBN1/NDUFA11/PPM1F/ABI2/SAFB2/NDUFA10
DESI1	0.7712	1.36059	0.0482846	6062	tags=29%, list=11%, signal=25%	MYH9/PPM1F/ATXN10/RRP1/CHD4/NLN/EPAS1/STRAP/WASF2/MYH10/GCN1/TLN1/ZHX2/ACTG1/ACTB/NDUFA10/SLC3A2/SAMM50/SMPD4/SART3/MYL6/FANCI/NDUFC1/UBASH3B
NUFIP1P1	0.80926	1.36047	0.0395894	4425	tags=18%, list=8%, signal=16%	PCBP2/SAFB2/HNRNPA3/SLC2A1/NDUFS1/FLNB/NDUFA10/ACTG2/IPO4/IPO7/SLC3A2/NDUFC1/HNRNPU/DSTN/TLN1
RTL10	0.863422	1.36043	0.0301974	2882	tags=27%, list=5%, signal=26%	PPM1F/HNRNPU/DHX9/HNRNPM/ATXN10/SAMM50/HNRNPA3/GCN1/WASF2/DBN1/MYH9/NDUFA10/SART3/ABI2/SAFB2/STRAP/TRIP6/RRP1/SMPD4/NLN/FANCI/ACTA2/ACTG1
TPRKB	0.889837	1.36043	0.00466778	1669	tags=15%, list=3%, signal=15%	BRK1/TARDBP/AAAS/HNRNPA3/PCBP2/FANCI/HNRNPH1/SAMM50/RPN1/MYL6/SMPD4/CAPZB/CHCHD3
TUFT1	0.827588	1.36038	0.0211368	2171	tags=23%, list=4%, signal=22%	HNRNPU/SMPD4/CD2AP/RPA1/HNRNPA3/ANP32E/FANCI/LRPPRC/NDUFS2/GCN1/RUFY1/DHX9/ATXN10/NDUFS1/DBN1/ACTB/SART3/GYS1/SLC2A1
URB1	0.885115	1.36035	0.00843384	2633	tags=25%, list=5%, signal=24%	GTF2I/GCN1/IPO7/MYH9/CNOT1/DHX9/RRP1/LRPPRC/NCKAP1/ATXN10/SART3/CYFIP1/TLN1/UBASH3B/NDUFS1/ZHX2/PDLIM1/ACTN4/ANP32E/ARMC6/HNRNPM
HDDC3	0.783851	1.36035	0.033462	3493	tags=18%, list=6%, signal=17%	MYL6/AAAS/IPO4/RUFY1/ACTA2/CAPZB/BRK1/WASF2/PCBP2/RNH1/FLNA/NDUFC1/SLC3A2/TRIP6/LRPPRC
ZNF337-AS1	0.8997	1.36031	0.00280013	1932	tags=15%, list=4%, signal=15%	LRPPRC/HNRNPU/SMPD4/DHX9/HNRNPH1/PRC1/CNOT1/NCKAP1/RPA1/ANP32E/GCN1/SPART/FLNB
SMARCC1	0.923106	1.36029	0.00265406	967	tags=19%, list=2%, signal=19%	DHX9/HNRNPU/IPO7/CD2AP/RPA1/SMPD4/GCN1/ZHX2/FANCI/SART3/HNRNPA3/HNRNPM/ABI2/LRPPRC/AAAS/FLNB
E2F6	0.908606	1.36028	0.00228246	1140	tags=17%, list=2%, signal=16%	SMPD4/ABI2/HNRNPU/DHX9/HNRNPA3/SART3/HNRNPM/GCN1/ANP32E/TARDBP/RPA1/HNRNPH1/CYFIP1/ZHX2
SNRPD3	0.84225	1.36026	0.0334101	2305	tags=20%, list=4%, signal=19%	ATXN10/DHX9/HNRNPM/IPO7/SMPD4/LRPPRC/SAMM50/NDUFA10/PCBP2/SART3/NDUFS1/RPA1/MYH10/BOP1/ACTN4/CNOT1/UBASH3B
HMGB3P4	0.836457	1.36018	0.0335353	1461	tags=7%, list=3%, signal=7%	GTF2I/CYFIP1/HNRNPH1/PRC1/SART3/ACTB
MTMR11	0.792971	1.36016	0.044176	1377	tags=13%, list=2%, signal=13%	ZHX2/SQSTM1/HNRNPU/NLN/PRDX1/ANP32E/NUBPL/CD2AP/BOP1/SLC2A1/DHX9
AC016773.1	0.871754	1.36013	0.0131793	1331	tags=7%, list=2%, signal=7%	TARDBP/SAFB2/NDUFA11/ABI2/CHD4/SLC2A3
RIOK1	0.89105	1.36006	0.0102574	3452	tags=35%, list=6%, signal=32%	CD2AP/SART3/HNRNPA3/ANP32E/AAAS/SMPD4/RPA1/BOP1/TARDBP/LRPPRC/HNRNPU/NLN/ACTA1/BRK1/ACTB/TNKS1BP1/ACTG1/SLC3A2/ATXN10/SLC7A11/RPN1/PML/NDUFA11/DHX9/TRIP6/WASF2/FLNB/PCBP2/MYH10
XRCC1	0.882064	1.36001	0.024855	2180	tags=19%, list=4%, signal=18%	AAAS/RPA1/HNRNPA3/FANCI/ABI2/HNRNPM/GYS1/SMPD4/PCBP2/CHD4/RUFY1/RRP1/IQGAP1/ACTC1/BOP1/PPM1F
AP1S1	0.805487	1.35998	0.0424469	4232	tags=27%, list=8%, signal=25%	CHCHD3/RRP1/NDUFS2/NDUFA10/SMPD4/SPART/ACTB/TRIP6/PRDX1/BOP1/BRK1/ACTG1/STRAP/DSTN/GYS1/LRPPRC/AAAS/GCN1/TNKS1BP1/FLNA/PCBP2/FANCI/WASF2
AL008730.1	0.927871	1.35996	0.0134992	1389	tags=6%, list=3%, signal=6%	PRDX1/PML/CAPZB/ANP32E/IQGAP1
AC016065.1	0.809495	1.35994	0.0457846	4324	tags=29%, list=8%, signal=26%	IQGAP1/CHCHD3/HNRNPU/STRAP/DBN1/DHX9/TARDBP/PML/FLNA/ACTG1/IPO4/ANP32E/ARMC6/ACTN4/NDUFS1/SLC2A3/TRIP6/PDLIM1/RPA1/SQSTM1/GTF2I/NSUN2/CYFIP1/HNRNPH1
AC005479.2	0.793899	1.35988	0.0406723	2599	tags=15%, list=5%, signal=15%	RAC1/UBASH3B/TARDBP/ACTB/RRP1/DSTN/PML/CHCHD3/PRC1/SLC2A3/SLC7A11/NLN/ACTG2
PVR	0.755214	1.35988	0.0366492	4612	tags=30%, list=8%, signal=27%	IPO7/RPN1/SMPD4/STRAP/RUFY1/NCKAP1/MYH9/CD2AP/CYFIP1/SLC2A1/CHCHD3/CAPZB/TRIP6/FLNB/ACTB/RRP1/PDLIM1/MYL6/DSTN/PRC1/ZHX2/ACTG2/HNRNPU/DHX9/GYS1
TEX2	0.846824	1.35987	0.0368239	5000	tags=27%, list=9%, signal=25%	CNOT1/GTF2I/IPO7/EPAS1/NUBPL/ABI2/DBN1/AAAS/NCKAP1/BOP1/CHD4/WASF2/DHX9/RPN1/PRDX1/ATXN10/SAMM50/CD2AP/CYFIP1/RUFY1/MYH9/FLNA/RRP1
COPS2	0.876403	1.35981	0.0279642	2276	tags=19%, list=4%, signal=18%	IPO7/CYFIP1/LRPPRC/ABI2/MYH9/SMPD4/NCKAP1/CD2AP/NDUFA10/HNRNPU/SLC2A3/NDUFS1/NDUFC1/MYH10/SART3/ACTN4
DDX52	0.914899	1.35963	0.00438104	1080	tags=17%, list=2%, signal=16%	DHX9/HNRNPU/CD2AP/NCKAP1/LRPPRC/IPO7/RPA1/SMPD4/HNRNPA3/SART3/GCN1/FANCI/CYFIP1/DBN1
CCDC138	0.875442	1.35957	0.0127834	2311	tags=18%, list=4%, signal=17%	HNRNPU/SMPD4/LRPPRC/HNRNPA3/RPA1/DHX9/FANCI/PCBP2/WASF2/CAPZB/ZHX2/ACTG1/UBASH3B/AAAS/SLC7A11
AC103691.2	0.833847	1.35954	0.0413223	3044	tags=18%, list=6%, signal=17%	PRDX1/DSTN/CHCHD3/RUFY1/SPART/MYL6/NLN/NUBPL/NDUFA10/CYFIP1/ACTA2/INF2/FLNB/RPA1/CD2AP
MIPOL1	0.859177	1.35952	0.019476	2396	tags=13%, list=4%, signal=13%	HNRNPA3/TARDBP/SMPD4/SAFB2/CD2AP/SART3/CYFIP1/PRC1/HNRNPH1/NUBPL/ANP32E
RIT1	0.899103	1.3595	0.00517365	2134	tags=17%, list=4%, signal=16%	HNRNPA3/SART3/NCKAP1/TARDBP/HNRNPU/HNRNPH1/ACTG1/HNRNPM/IQGAP1/PML/ANP32E/SLC2A1/RAC1/CD2AP
RIOX2	0.853489	1.35946	0.0142761	3848	tags=31%, list=7%, signal=29%	NLN/PRDX1/NSUN2/SQSTM1/TLN1/CYFIP1/ACTN4/IQGAP1/FANCI/CNOT1/GCN1/NDUFS1/PML/FLNB/SLC7A11/FLNA/ARMC6/HNRNPH1/SLC3A2/BOP1/UBASH3B/SART3/EPAS1/RPN1/RUFY1/OXSM
CD44-AS1	0.871176	1.35943	0.0146226	3642	tags=15%, list=7%, signal=14%	IQGAP1/LRPPRC/SPART/ACTB/SAMM50/PML/SLC7A11/RPN1/SLC3A2/PRDX1/ACTA2/CHCHD3/ARMC6
C12orf4	0.880217	1.35937	0.0078289	2049	tags=19%, list=4%, signal=18%	DHX9/ABI2/RPA1/HNRNPU/IQGAP1/FANCI/STRAP/GYS1/HNRNPA3/ACTB/ACTC1/FLNA/UBASH3B/TLN1/RAC1/CHCHD3
ZMYM3	0.903668	1.35927	0.00747593	2067	tags=24%, list=4%, signal=23%	SART3/RPA1/SMPD4/DHX9/LRPPRC/HNRNPU/GCN1/HNRNPM/TARDBP/CNOT1/MYH10/ANP32E/AAAS/GYS1/IPO7/NCKAP1/FANCI/SLC3A2/RUFY1/SQSTM1
PLS3	0.853667	1.35918	0.0134698	1918	tags=12%, list=3%, signal=12%	GTF2I/CNOT1/NDUFS1/TLN1/HNRNPU/EPAS1/PRDX1/MYH10/TNKS1BP1/HNRNPM
SESTD1	0.846843	1.35914	0.0165583	3996	tags=25%, list=7%, signal=23%	NCKAP1/DHX9/IPO7/SMPD4/LRPPRC/HNRNPA3/HNRNPU/CD2AP/GTF2I/CHCHD3/CNOT1/NDUFS2/RUFY1/CYFIP1/PCBP2/DSTN/SLC2A1/RRP1/NDUFA11/ACTG2/PDLIM1
MMP11	0.861069	1.35914	0.0218902	1825	tags=11%, list=3%, signal=10%	DBN1/PCBP2/ATXN10/CHD4/ABI2/NDUFC1/TRIP6/BOP1/FLNA
TOMM22	0.857147	1.35912	0.0242084	3176	tags=27%, list=6%, signal=26%	ATXN10/BRK1/PCBP2/RAC1/HNRNPM/SMPD4/AAAS/PPM1F/RRP1/ZHX2/SAMM50/NDUFA10/FLNB/TARDBP/RUFY1/MRPS17/OXSM/RPN1/DBN1/MYL6/CAPZB/BOP1/NLN
AC074117.1	0.830476	1.35909	0.0291375	2422	tags=21%, list=4%, signal=21%	SMPD4/LRPPRC/HNRNPH1/SART3/HNRNPA3/ANP32E/HNRNPM/CNOT1/GCN1/PCBP2/HNRNPU/PPM1F/FANCI/NDUFA11/SPART/NDUFC1/IPO4/PRDX1
RFC5	0.911671	1.35906	0.0111786	1365	tags=17%, list=2%, signal=16%	FANCI/HNRNPA3/SART3/PRC1/ANP32E/GYS1/HNRNPU/RPA1/HNRNPH1/MYL6/DHX9/AAAS/ABI2/RAC1
CCT5	0.912563	1.35904	0.00485971	1999	tags=29%, list=4%, signal=28%	NSUN2/DHX9/SMPD4/HNRNPM/LRPPRC/SART3/HNRNPA3/TARDBP/MYH9/CHCHD3/HNRNPU/WASF2/SAMM50/GCN1/CNOT1/RPN1/RNH1/NLN/BOP1/SQSTM1/PRDX1/ANP32E/RAC1/ABI2
TDG	0.918118	1.35903	0.00535778	1737	tags=24%, list=3%, signal=23%	SART3/HNRNPA3/HNRNPU/SMPD4/HNRNPH1/GCN1/CD2AP/NCKAP1/ABI2/ANP32E/IPO7/RAC1/TARDBP/OXSM/DHX9/TLN1/RPA1/FLNA/ACTN4/LRPPRC
AC020913.1	0.933069	1.35898	0.0456454	764	tags=12%, list=1%, signal=12%	RNH1/SLC3A2/SQSTM1/STRAP/PPM1F/MYH9/ACTC1/ACTA1/DHX9/SLC2A3
KDM3A	0.908936	1.35887	0.00597278	1642	tags=18%, list=3%, signal=17%	DHX9/IPO7/SART3/NCKAP1/SMPD4/HNRNPU/PCBP2/LRPPRC/CD2AP/ACTN4/HNRNPH1/MYH9/CYFIP1/CAPZB/NDUFS1
ZNF451	0.899488	1.35885	0.00550913	1704	tags=12%, list=3%, signal=12%	SART3/DHX9/CD2AP/IPO7/AAAS/CNOT1/GTF2I/HNRNPH1/ANP32E/RAC1
AC130689.1	0.841854	1.35883	0.0318907	2741	tags=23%, list=5%, signal=22%	CNOT1/NDUFS2/NCKAP1/NDUFA11/GTF2I/DHX9/CYFIP1/NDUFS1/IPO4/ANP32E/RNH1/TLN1/TNKS1BP1/LRPPRC/IPO7/PML/BOP1/HNRNPA3/MYL6
ABCA4	0.796319	1.35878	0.048433	2861	tags=15%, list=5%, signal=15%	PRDX1/SLC7A11/NLN/GYS1/CHCHD3/TNKS1BP1/HNRNPM/NDUFA10/NUBPL/INF2/ACTG2/GCN1/PDLIM1
SLC35F4	0.984352	1.35873	0.00667118	87	tags=4%, list=0%, signal=4%	ACTB/PML/GYS1
DVL2	0.899699	1.35872	0.00445176	1068	tags=17%, list=2%, signal=16%	RPA1/HNRNPU/SART3/GCN1/SMPD4/DHX9/AAAS/TARDBP/RUFY1/ATXN10/HNRNPA3/MYH10/ACTN4/LRPPRC
CHCHD2P6	0.802413	1.35871	0.0240338	3961	tags=23%, list=7%, signal=21%	SMPD4/CAPZB/ARMC6/RPN1/TARDBP/ACTBL2/CHCHD3/NDUFC1/NDUFS2/NSUN2/PRDX1/NUBPL/MYL6/SQSTM1/HNRNPU/RAC1/CD2AP/IQGAP1/TRIP6
NFKBIE	0.873397	1.35866	0.00966014	3026	tags=24%, list=5%, signal=23%	ACTB/UBASH3B/CHD4/RRP1/RAC1/SLC2A3/PML/MRPS17/TARDBP/NDUFS2/RNH1/ACTN4/IQGAP1/SMPD4/PCBP2/CNOT1/WASF2/IPO4/BOP1/SLC2A1
GAN	0.873783	1.35864	0.00772857	1574	tags=20%, list=3%, signal=20%	HNRNPA3/CNOT1/HNRNPU/NCKAP1/DHX9/SMPD4/ACTBL2/ANP32E/SLC2A1/STRAP/CAPZB/HNRNPH1/ZHX2/WASF2/RPA1/SART3/PPM1F
MT-CO3	0.807998	1.35862	0.038741	3902	tags=26%, list=7%, signal=24%	HNRNPM/RPN1/MYL6/BRK1/NLN/CYFIP1/BOP1/FANCI/NDUFA10/IPO7/RAC1/DHX9/DSTN/CHCHD3/FLNA/RNH1/RPA1/CAPZB/SQSTM1/ACTN4/CHD4/ACTA2
KIF7	0.819045	1.35859	0.0368609	2720	tags=17%, list=5%, signal=16%	SMPD4/ABI2/HNRNPU/DBN1/MYH10/SART3/GCN1/HNRNPM/FLNB/AAAS/PML/IPO4/RPA1/ACTA2
NME6	0.889085	1.35859	0.00677812	3023	tags=31%, list=5%, signal=29%	HNRNPA3/HNRNPM/HNRNPU/GCN1/DHX9/CAPZB/SART3/BRK1/TARDBP/SMPD4/NCKAP1/LRPPRC/FANCI/AAAS/RPA1/IPO4/PRC1/TLN1/NDUFS2/STRAP/WASF2/GYS1/DSTN/BOP1/GTF2I/ATXN10
METAP2	0.893833	1.35858	0.0137579	1571	tags=25%, list=3%, signal=24%	SART3/DHX9/HNRNPU/RPA1/GCN1/HNRNPM/IPO7/LRPPRC/FANCI/HNRNPA3/SMPD4/ACTN4/HNRNPH1/ATXN10/IQGAP1/TNKS1BP1/FLNA/SAFB2/ACTB/ANP32E/PCBP2
TBC1D17	0.800159	1.35855	0.0355828	2508	tags=15%, list=5%, signal=15%	AAAS/SMPD4/RNH1/GYS1/MYH10/NDUFA11/ACTN4/ANP32E/SPART/CHD4/UBASH3B/NDUFS2/ARMC6
KRT222	0.789928	1.35854	0.0449591	3263	tags=11%, list=6%, signal=10%	DHX9/SLC2A3/RNH1/ABI2/ACTC1/RUFY1/MYH10/ACTG1/TRIP6
OR10H2	0.971791	1.35854	0.0411943	1557	tags=6%, list=3%, signal=6%	BOP1/ACTA2/ZHX2/GCN1/ANP32E
MAPRE2	0.833895	1.35853	0.0163847	1999	tags=14%, list=4%, signal=14%	CYFIP1/CNOT1/PRDX1/WASF2/PPM1F/EPAS1/MYH9/FLNB/NSUN2/NDUFA11/NDUFS1/ACTG2
POLDIP3	0.900102	1.35851	0.00736044	1313	tags=14%, list=2%, signal=14%	ATXN10/PPM1F/GCN1/HNRNPA3/SMPD4/DHX9/AAAS/SAMM50/CD2AP/SART3/TLN1/HNRNPU
LETMD1	0.799828	1.35848	0.0419236	643	tags=13%, list=1%, signal=13%	AAAS/IPO7/SMPD4/RPA1/HNRNPU/ZHX2/DHX9/SART3/PCBP2/NDUFA10/PPM1F
ACVR2A	0.868982	1.35841	0.0312139	2841	tags=24%, list=5%, signal=23%	NCKAP1/HNRNPH1/GTF2I/HNRNPU/NDUFS1/SAFB2/ABI2/HNRNPA3/PRDX1/TNKS1BP1/SART3/CNOT1/TLN1/EPAS1/DHX9/ARMC6/CYFIP1/ACTA1/SLC2A3/RPA1
BCAP31	0.846036	1.35826	0.0153906	2327	tags=20%, list=4%, signal=19%	BOP1/RNH1/PDLIM1/SLC3A2/BRK1/SAMM50/SQSTM1/NDUFS2/RAC1/NDUFA10/NDUFS1/ACTG1/RRP1/LRPPRC/PPM1F/GCN1/ACTB
SPRYD3	0.828922	1.35826	0.0218589	2172	tags=17%, list=4%, signal=16%	RNH1/PML/RPA1/AAAS/SART3/HNRNPM/NUBPL/INF2/ATXN10/FLNA/RPN1/TNKS1BP1/NDUFA10/PRC1
EEF1AKNMT	0.880565	1.35815	0.0176588	1950	tags=19%, list=4%, signal=18%	DHX9/SART3/NDUFS2/HNRNPM/HNRNPU/SMPD4/RNH1/RPA1/BRK1/IPO7/ACTA1/FANCI/ACTN4/DSTN/AAAS/TNKS1BP1
UQCRC2	0.830056	1.35812	0.0300926	3345	tags=24%, list=6%, signal=22%	NDUFS1/GTF2I/NDUFA10/NDUFS2/CHCHD3/MYH10/FLNA/CNOT1/CYFIP1/PRDX1/NSUN2/RRP1/NCKAP1/PRC1/ACTG2/NLN/ACTN4/NUBPL/DHX9/IPO4
IGHV3-79	0.843053	1.35807	0.0358566	1573	tags=14%, list=3%, signal=14%	SMPD4/ABI2/UBASH3B/CD2AP/DHX9/ACTA1/TRIP6/CHD4/CNOT1/GTF2I/MYH10/ACTG1
ST13P10	0.775782	1.35803	0.0438472	5568	tags=18%, list=10%, signal=16%	LRPPRC/NCKAP1/DHX9/GTF2I/FLNA/MYH9/AAAS/ACTG2/RRP1/IQGAP1/HNRNPA3/OXSM/WASF2/FLNB/TARDBP
ZNF394	0.82511	1.35783	0.0320665	3052	tags=23%, list=6%, signal=21%	TARDBP/CHCHD3/RRP1/HNRNPM/HNRNPU/RAC1/BRK1/SLC2A1/ABI2/GYS1/IPO7/MYL6/RUFY1/ATXN10/SLC3A2/INF2/OXSM/PPM1F/TRIP6
YWHAZP5	0.906493	1.3578	0.00259788	1369	tags=18%, list=2%, signal=17%	IQGAP1/IPO7/CNOT1/CYFIP1/GTF2I/MYH9/NCKAP1/TLN1/HNRNPM/ACTB/NDUFA11/DBN1/ZHX2/CHCHD3/SLC2A1
YLPM1	0.92792	1.35777	0.00569828	1372	tags=19%, list=2%, signal=19%	DHX9/IPO7/FLNA/GTF2I/CNOT1/SART3/ACTN4/CYFIP1/MYH9/ABI2/NCKAP1/HNRNPM/ACTB/SAFB2/CD2AP/SMPD4
AC019193.2	0.750847	1.35774	0.0473458	4772	tags=20%, list=9%, signal=19%	NDUFC1/ANP32E/FLNA/SLC7A11/NUBPL/ACTG1/PML/DBN1/AAAS/ZHX2/SLC2A3/MRPS17/RUFY1/NDUFA10/GCN1/TNKS1BP1/NCKAP1
GORAB	0.894287	1.35767	0.00312321	2454	tags=18%, list=4%, signal=17%	MYH9/IQGAP1/ACTN4/NCKAP1/DHX9/CD2AP/HNRNPA3/HNRNPH1/LRPPRC/CYFIP1/INF2/PRDX1/ATXN10/UBASH3B/SQSTM1
MCOLN1	0.849428	1.35763	0.0291375	2641	tags=24%, list=5%, signal=23%	DHX9/RNH1/ACTN4/SQSTM1/RPA1/IPO4/GTF2I/HNRNPM/ACTA2/INF2/NDUFS1/MYH9/MYH10/CHCHD3/NLN/SAMM50/ABI2/SLC3A2/SLC7A11/PDLIM1
SCAMP4	0.866576	1.35761	0.0347534	2424	tags=20%, list=4%, signal=19%	SAFB2/HNRNPM/HNRNPA3/SART3/SMPD4/ACTN4/DHX9/CD2AP/RAC1/STRAP/ZHX2/SQSTM1/IPO7/RPN1/GTF2I/DBN1/RRP1
ACER3	0.844529	1.35761	0.0227167	2801	tags=24%, list=5%, signal=23%	SART3/FANCI/IQGAP1/ABI2/PML/NSUN2/NCKAP1/RPN1/CHD4/ACTB/STRAP/HNRNPH1/SLC7A11/CD2AP/RNH1/CHCHD3/SAFB2/ZHX2/DSTN/HNRNPA3
TRMT10C	0.830259	1.35749	0.0168827	2194	tags=12%, list=4%, signal=11%	OXSM/TARDBP/HNRNPU/LRPPRC/RPA1/DHX9/SLC7A11/SMPD4/TLN1/STRAP
GMEB1	0.895844	1.35744	0.00547326	2194	tags=21%, list=4%, signal=21%	WASF2/HNRNPM/TARDBP/SART3/SAFB2/GCN1/CAPZB/SMPD4/GYS1/ABI2/DHX9/PPM1F/INF2/HNRNPH1/ACTN4/HNRNPU/RPA1/PDLIM1
GSTA4	0.751108	1.35741	0.0389105	5781	tags=29%, list=10%, signal=26%	DHX9/PML/NDUFS2/MYH9/SMPD4/FLNB/PPM1F/SLC3A2/CYFIP1/SAMM50/HNRNPM/RPN1/LRPPRC/HNRNPH1/EPAS1/NLN/DBN1/ACTBL2/RAC1/MYH10/RPA1/NSUN2/PRC1/IQGAP1
MDC1	0.913555	1.35735	0.00685916	2263	tags=24%, list=4%, signal=23%	DHX9/SART3/HNRNPU/CD2AP/HNRNPM/FANCI/SMPD4/RPA1/ANP32E/TARDBP/HNRNPH1/ACTN4/AAAS/HNRNPA3/IQGAP1/GTF2I/ACTB/RAC1/MYH9/SLC7A11
TMEM43	0.899698	1.35735	0.00182077	3187	tags=32%, list=6%, signal=30%	HNRNPU/FLNA/SMPD4/ABI2/HNRNPH1/RPA1/ACTN4/ACTG1/FLNB/DHX9/NSUN2/MYH9/GTF2I/MYH10/RAC1/SART3/DBN1/ACTA2/HNRNPA3/ACTB/CAPZB/OXSM/SLC7A11/WASF2/PML/TRIP6/NCKAP1
TMEM263	0.835773	1.35727	0.0172031	2409	tags=14%, list=4%, signal=14%	IQGAP1/ABI2/FANCI/SMPD4/SART3/TARDBP/NCKAP1/ARMC6/GCN1/HNRNPA3/CD2AP/PRDX1
BCAN	0.818022	1.35722	0.0283924	2421	tags=14%, list=4%, signal=14%	NDUFS2/SQSTM1/NLN/ACTN4/INF2/CD2AP/MYH10/BOP1/RUFY1/ACTBL2/ACTG1/TRIP6
AC107027.3	0.826793	1.35716	0.0175634	4041	tags=26%, list=7%, signal=24%	NCKAP1/HNRNPU/FLNB/SAFB2/DHX9/RPA1/ATXN10/GTF2I/INF2/NUBPL/PRDX1/CD2AP/OXSM/SAMM50/HNRNPM/SLC2A1/SMPD4/HNRNPA3/RRP1/MRPS17/EPAS1/GYS1
CCT8	0.869401	1.35713	0.0199692	2809	tags=30%, list=5%, signal=28%	LRPPRC/HNRNPM/RRP1/HNRNPA3/GCN1/HNRNPU/RPA1/IPO7/DHX9/AAAS/SART3/ACTG1/TARDBP/PRDX1/OXSM/EPAS1/SAFB2/NDUFS2/STRAP/CD2AP/PML/BRK1/PPM1F/RUFY1/NLN
CD2BP2	0.881351	1.35711	0.020349	1957	tags=18%, list=4%, signal=17%	MYL6/BRK1/TARDBP/CHD4/ACTB/FANCI/RAC1/DBN1/UBASH3B/HNRNPM/SLC3A2/IPO7/NSUN2/ACTG1/PRDX1
FIP1L1	0.908555	1.35711	0.00205753	2260	tags=24%, list=4%, signal=23%	DHX9/HNRNPU/ABI2/SMPD4/SART3/TLN1/HNRNPA3/CNOT1/ANP32E/PPM1F/SLC3A2/CYFIP1/RPA1/IPO7/MYL6/MYH9/CHCHD3/RUFY1/NDUFC1/NDUFS2
FMNL2	0.861157	1.3571	0.0158356	3205	tags=25%, list=6%, signal=24%	GYS1/RPA1/IQGAP1/BOP1/ABI2/PCBP2/SLC7A11/HNRNPU/UBASH3B/FLNA/SQSTM1/ACTB/CNOT1/STRAP/DBN1/SAMM50/MYH10/DHX9/SLC2A3/RPN1/EPAS1
INTS7	0.868532	1.3571	0.0212392	2696	tags=20%, list=5%, signal=19%	DHX9/ANP32E/HNRNPU/RUFY1/ATXN10/AAAS/HNRNPA3/SART3/TARDBP/ACTG1/PML/OXSM/ACTN4/CHCHD3/RRP1/FLNA/ACTA2
SPTAN1	0.868479	1.35709	0.0165583	1498	tags=26%, list=3%, signal=26%	DHX9/NCKAP1/IPO7/FLNB/ACTN4/MYH9/CYFIP1/HNRNPU/GCN1/SMPD4/SART3/DBN1/LRPPRC/ACTG1/INF2/MYL6/TRIP6/ACTB/TNKS1BP1/HNRNPM/GTF2I/ARMC6
UHRF1BP1	0.894646	1.35705	0.00899596	1356	tags=15%, list=2%, signal=15%	CD2AP/WASF2/DHX9/GCN1/SMPD4/CYFIP1/LRPPRC/HNRNPU/ANP32E/IPO7/FANCI/SART3/NLN
WFS1	0.824351	1.35698	0.0268032	3770	tags=27%, list=7%, signal=26%	MYH9/SMPD4/RNH1/HNRNPM/SART3/DHX9/NDUFS2/ACTN4/CD2AP/NCKAP1/ATXN10/SLC2A1/HNRNPA3/CYFIP1/ACTA2/PRDX1/PML/RPN1/ACTG2/SLC2A3/BRK1/BOP1/NDUFA10
USP5	0.830436	1.35698	0.0308924	4064	tags=31%, list=7%, signal=29%	STRAP/DHX9/GCN1/LRPPRC/AAAS/ATXN10/ACTN4/BRK1/CNOT1/NCKAP1/SMPD4/OXSM/NDUFS2/NDUFA10/SQSTM1/SART3/PML/SAMM50/FLNB/GYS1/RRP1/RPN1/SLC3A2/ACTA1/ACTA2/CHD4
SNORD79	0.999237	1.35692	0.0496324	44	tags=2%, list=0%, signal=2%	SLC3A2/PRC1
RBM17	0.909529	1.35692	0.00826614	1409	tags=20%, list=3%, signal=20%	HNRNPA3/HNRNPM/ABI2/SMPD4/DHX9/TARDBP/HNRNPU/ACTN4/FANCI/RPA1/GYS1/SAFB2/PDLIM1/GCN1/LRPPRC/SART3/TRIP6
CACNB1	0.907216	1.3569	0.00485456	974	tags=8%, list=2%, signal=8%	IQGAP1/ABI2/SMPD4/FLNA/FANCI/SAFB2/HNRNPH1
P4HA2	0.794252	1.3569	0.0226268	3699	tags=27%, list=7%, signal=26%	SLC3A2/CAPZB/RPN1/MYH9/SQSTM1/DHX9/CHCHD3/RNH1/RUFY1/SLC2A1/PRDX1/BRK1/TRIP6/BOP1/NDUFA10/INF2/DSTN/NDUFC1/FLNA/GCN1/CHD4/ACTG1/PCBP2
EEF2	0.820629	1.35683	0.0344418	3568	tags=23%, list=6%, signal=21%	IPO7/ACTN4/MYH9/DHX9/CNOT1/LRPPRC/TLN1/ACTG2/SAFB2/ACTA2/SMPD4/CYFIP1/NDUFS2/GYS1/DSTN/SLC2A3/MYH10/IQGAP1/EPAS1
SCRN3	0.919769	1.35678	0.00391245	639	tags=10%, list=1%, signal=9%	NDUFS1/NCKAP1/CNOT1/LRPPRC/GTF2I/IPO7/MYH9/CHD4
HSPA5	0.800716	1.35666	0.0487805	4514	tags=27%, list=8%, signal=25%	RPN1/TARDBP/DHX9/HNRNPA3/NCKAP1/ACTN4/RUFY1/TNKS1BP1/UBASH3B/TLN1/NDUFA11/WASF2/INF2/GCN1/MYH10/DBN1/PRDX1/MYL6/CAPZB/RRP1/PML/STRAP/SAMM50
DUSP28	0.855817	1.35665	0.0115018	3006	tags=23%, list=5%, signal=21%	SMPD4/ABI2/HNRNPU/HNRNPA3/TARDBP/PRC1/TNKS1BP1/SAFB2/CHD4/PPM1F/HNRNPH1/RRP1/LRPPRC/SLC7A11/SAMM50/NDUFA11/FANCI/NDUFC1/NLN
CWC27	0.892642	1.35658	0.00773307	1733	tags=26%, list=3%, signal=25%	HNRNPU/AAAS/HNRNPM/DHX9/HNRNPA3/TARDBP/CAPZB/GCN1/FANCI/RUFY1/PRDX1/IPO7/ABI2/IQGAP1/RPA1/DBN1/SLC3A2/WASF2/SAFB2/SLC2A1/RPN1/HNRNPH1
RPS4XP17	0.769086	1.35655	0.038835	2973	tags=17%, list=5%, signal=16%	HNRNPA3/RPA1/AAAS/FLNB/SAFB2/MRPS17/NDUFA11/PRC1/PPM1F/TRIP6/ABI2/ACTA1/ARMC6/GYS1
FERMT1	0.833672	1.35655	0.0303767	4524	tags=25%, list=8%, signal=23%	ZHX2/NUBPL/BOP1/GCN1/RPA1/NDUFA10/SMPD4/SLC7A11/STRAP/RAC1/NCKAP1/SPART/RNH1/WASF2/SLC3A2/ACTG2/SQSTM1/NDUFA11/NDUFC1/IPO4/SAFB2
AL049539.1	0.817155	1.35643	0.0343407	1918	tags=10%, list=3%, signal=9%	AAAS/HNRNPU/PRC1/GYS1/CHD4/ZHX2/GTF2I/ACTA2
RPL7AP31	0.814752	1.35642	0.0387374	66	tags=2%, list=0%, signal=2%	HNRNPM/IPO4
TRIM4	0.878216	1.3564	0.0121326	2741	tags=19%, list=5%, signal=18%	GTF2I/CNOT1/DHX9/IPO7/SART3/CYFIP1/MYH10/SLC2A3/RUFY1/CHCHD3/NDUFS2/TNKS1BP1/RPN1/PML/SPART/PCBP2
OSMR	0.844333	1.3564	0.0169023	3787	tags=24%, list=7%, signal=22%	IQGAP1/ACTB/TLN1/SPART/UBASH3B/SLC7A11/SLC2A1/HNRNPU/PML/PDLIM1/NSUN2/NCKAP1/DSTN/ACTA1/NDUFC1/BRK1/NLN/MYH10/ACTG1/OXSM
POLR2G	0.861736	1.35638	0.0156193	3480	tags=24%, list=6%, signal=22%	BRK1/TARDBP/CHD4/RRP1/RAC1/PCBP2/HNRNPM/SART3/CAPZB/SMPD4/AAAS/WASF2/MYH10/SLC2A1/PRDX1/MYL6/RNH1/NDUFA10/NDUFS2/ACTC1
NRBP1	0.883314	1.35635	0.00669596	1538	tags=23%, list=3%, signal=22%	DHX9/SART3/PCBP2/HNRNPA3/ACTN4/RNH1/HNRNPU/NDUFA10/CAPZB/BRK1/HNRNPM/TNKS1BP1/SMPD4/RPN1/CHCHD3/RPA1/MYL6/ATXN10/SAMM50
CCZ1B	0.837844	1.35625	0.0197031	3451	tags=26%, list=6%, signal=25%	DHX9/CHCHD3/IPO7/RAC1/GYS1/HNRNPU/DSTN/CYFIP1/CNOT1/SLC2A1/LRPPRC/EPAS1/CAPZB/NDUFS2/FANCI/HNRNPM/NDUFS1/SART3/SLC7A11/RPA1/SQSTM1/NLN
AC018628.1	0.804153	1.35623	0.0322581	1784	tags=14%, list=3%, signal=14%	HNRNPA3/SMPD4/FANCI/NDUFC1/SLC3A2/IQGAP1/ACTB/NDUFS1/HNRNPH1/HNRNPU/CD2AP/NDUFS2
HNRNPC	0.932097	1.35616	0.00246771	1161	tags=20%, list=2%, signal=20%	DHX9/HNRNPU/SART3/HNRNPM/ANP32E/HNRNPA3/HNRNPH1/ATXN10/NCKAP1/GYS1/SAFB2/SMPD4/MYL6/TARDBP/GCN1/ABI2/NSUN2
MTERF4	0.800707	1.35615	0.0361882	1480	tags=14%, list=3%, signal=14%	NDUFA10/SART3/HNRNPH1/ABI2/RPA1/SMPD4/HNRNPU/HNRNPA3/LRPPRC/PCBP2/MYL6/PML
TRNT1	0.834061	1.3561	0.0290023	2767	tags=24%, list=5%, signal=23%	STRAP/LRPPRC/DHX9/ABI2/GTF2I/SLC3A2/HNRNPU/NSUN2/OXSM/NCKAP1/SART3/PRDX1/SMPD4/HNRNPM/BRK1/ACTG1/IQGAP1/NDUFS1/GCN1/HNRNPA3
C17orf80	0.892855	1.35609	0.0203262	980	tags=20%, list=2%, signal=20%	IPO7/FANCI/RPA1/HNRNPA3/CNOT1/HNRNPM/ACTN4/HNRNPU/SMPD4/SART3/DHX9/CD2AP/NCKAP1/CYFIP1/ACTG1/FLNA/MYH10
NUP37	0.930175	1.35607	0.0026028	2487	tags=36%, list=5%, signal=34%	SMPD4/AAAS/HNRNPM/FANCI/DHX9/HNRNPU/LRPPRC/TARDBP/HNRNPA3/CAPZB/SART3/PCBP2/RPA1/GCN1/TLN1/SLC7A11/PPM1F/RUFY1/MYH9/NSUN2/MYL6/RNH1/ACTN4/PDLIM1/SAFB2/SLC3A2/DBN1/NDUFC1/OXSM/STRAP
ANKRD27	0.849191	1.35601	0.0138557	2645	tags=31%, list=5%, signal=30%	HNRNPU/NCKAP1/ANP32E/HNRNPA3/DHX9/NLN/GCN1/RAC1/SLC7A11/HNRNPM/ABI2/RUFY1/SMPD4/RPA1/FANCI/TLN1/CAPZB/SQSTM1/CNOT1/IPO7/CYFIP1/PRC1/ZHX2/ACTN4/IQGAP1/NDUFS2
SEC11A	0.840826	1.35595	0.036036	845	tags=15%, list=2%, signal=15%	DHX9/HNRNPA3/PCBP2/BRK1/HNRNPU/SMPD4/ATXN10/ABI2/TARDBP/HNRNPH1/ZHX2/ACTC1/HNRNPM
ABCB8	0.79606	1.35589	0.04266	3723	tags=23%, list=7%, signal=21%	NDUFS2/CHCHD3/TRIP6/TNKS1BP1/EPAS1/RPN1/RRP1/NDUFA10/FANCI/MYL6/SQSTM1/MRPS17/INF2/SPART/PCBP2/SLC2A3/ACTG1/RPA1/PPM1F
ZNF250	0.859789	1.35586	0.0419664	1667	tags=19%, list=3%, signal=18%	BOP1/ZHX2/ACTN4/SART3/LRPPRC/SMPD4/DHX9/DSTN/HNRNPU/GCN1/ACTA2/PDLIM1/FLNB/RUFY1/ABI2/RPA1
DHX30	0.884825	1.35579	0.0192404	2770	tags=29%, list=5%, signal=27%	AAAS/SMPD4/BRK1/DHX9/SART3/GCN1/HNRNPU/HNRNPM/ZHX2/RRP1/RNH1/RPN1/HNRNPH1/SAFB2/MYH9/SLC3A2/ARMC6/RPA1/NDUFA10/FLNB/PCBP2/NDUFS1/OXSM/CHD4
SRSF4	0.907451	1.35575	0.00278171	1292	tags=19%, list=2%, signal=19%	SART3/HNRNPH1/CAPZB/HNRNPU/DHX9/SAFB2/AAAS/HNRNPA3/FANCI/ANP32E/PRDX1/IPO7/FLNA/PRC1/NDUFA11/GYS1
ARMCX1	0.864447	1.35573	0.0110727	2476	tags=19%, list=4%, signal=18%	IQGAP1/ABI2/HNRNPA3/TARDBP/AAAS/HNRNPM/STRAP/CHD4/NSUN2/GYS1/SPART/NDUFA10/DSTN/EPAS1/FLNA/TLN1
HARS2	0.836633	1.35572	0.0360046	2357	tags=21%, list=4%, signal=21%	NSUN2/RUFY1/HNRNPU/DHX9/IQGAP1/NDUFS2/SART3/NLN/OXSM/IPO7/AAAS/SQSTM1/SLC2A1/RNH1/TNKS1BP1/SLC3A2/SLC7A11/DBN1
SYDE1	0.890485	1.35567	0.0112765	1782	tags=14%, list=3%, signal=14%	FLNA/DBN1/ACTA2/UBASH3B/PRC1/RRP1/NDUFC1/ABI2/HNRNPM/SART3/GYS1/CYFIP1
WDR26	0.896381	1.35566	0.0381592	2119	tags=19%, list=4%, signal=18%	HNRNPU/NCKAP1/DHX9/MYH9/ATXN10/SAFB2/PRC1/UBASH3B/IPO7/TLN1/BOP1/GTF2I/SQSTM1/ACTN4/STRAP/SART3
COX15	0.802363	1.35564	0.0361727	3563	tags=24%, list=6%, signal=22%	GCN1/LRPPRC/NDUFA10/CYFIP1/PPM1F/SART3/GTF2I/PDLIM1/DHX9/NCKAP1/EPAS1/RNH1/DSTN/SAMM50/MRPS17/OXSM/HNRNPM/TLN1/CNOT1/NSUN2
CCSER2	0.874468	1.35563	0.0270455	817	tags=8%, list=1%, signal=8%	DHX9/NCKAP1/MYH10/GTF2I/PML/TLN1/EPAS1
SKP2	0.881705	1.35561	0.00887656	1433	tags=14%, list=3%, signal=14%	SMPD4/HNRNPH1/LRPPRC/DHX9/SART3/RPA1/MYH10/HNRNPA3/TARDBP/PCBP2/AAAS/NSUN2
SLC25A38	0.784847	1.35557	0.0456853	3232	tags=18%, list=6%, signal=17%	NSUN2/OXSM/BRK1/ANP32E/SLC3A2/PRC1/RNH1/CHD4/RRP1/FLNB/FANCI/SART3/NDUFS2/ATXN10/SAFB2
THAP8	0.821204	1.35554	0.035461	2911	tags=19%, list=5%, signal=18%	WASF2/RUFY1/RRP1/MRPS17/RAC1/DBN1/ARMC6/UBASH3B/PPM1F/HNRNPA3/BRK1/ATXN10/ACTBL2/CYFIP1/CAPZB/LRPPRC
FAM89B	0.864623	1.3555	0.0341078	2759	tags=15%, list=5%, signal=15%	NDUFA11/CHD4/MYL6/SQSTM1/CNOT1/EPAS1/IPO4/HNRNPU/GTF2I/ACTG1/IQGAP1/ZHX2/NDUFS2
SNX7	0.840627	1.35549	0.01383	2736	tags=24%, list=5%, signal=23%	HNRNPH1/FANCI/SART3/HNRNPM/HNRNPA3/ATXN10/ACTG1/PCBP2/ACTN4/SLC2A1/ACTBL2/SLC2A3/DSTN/TRIP6/AAAS/INF2/WASF2/SQSTM1/TLN1/ANP32E
MTIF2	0.837416	1.35545	0.0384168	1966	tags=15%, list=4%, signal=15%	LRPPRC/HNRNPU/DHX9/IPO7/CHCHD3/NDUFS2/CNOT1/GTF2I/BOP1/TARDBP/HNRNPM/TRIP6/NCKAP1
NUP155	0.934311	1.3554	0.00122911	1580	tags=25%, list=3%, signal=24%	DHX9/FANCI/SART3/IPO7/LRPPRC/SMPD4/GCN1/HNRNPU/RPA1/HNRNPA3/CHCHD3/GTF2I/NCKAP1/FLNB/ACTN4/HNRNPM/CHD4/CNOT1/STRAP/MYH10/PRDX1
DNAJC8	0.892621	1.3554	0.00636733	1682	tags=15%, list=3%, signal=15%	CAPZB/TARDBP/FANCI/ANP32E/SART3/WASF2/RNH1/HNRNPU/PRDX1/AAAS/PRC1/BRK1/PCBP2
DSEL	0.839966	1.35539	0.0188167	3231	tags=20%, list=6%, signal=19%	DSTN/FLNA/NDUFS1/IQGAP1/SART3/UBASH3B/NUBPL/IPO4/TARDBP/CYFIP1/HNRNPH1/CAPZB/SLC2A1/PPM1F/PRDX1/SAMM50/TRIP6
AC021016.1	0.807523	1.35527	0.029036	2513	tags=14%, list=5%, signal=14%	IQGAP1/DSTN/UBASH3B/ACTG1/FLNA/NUBPL/PPM1F/RAC1/IPO7/BOP1/SART3/RNH1
SOWAHC	0.814783	1.35525	0.0399061	2008	tags=20%, list=4%, signal=20%	LRPPRC/GTF2I/ZHX2/NCKAP1/NDUFS1/IPO7/SQSTM1/MYH9/NLN/NSUN2/ACTA1/SLC2A1/RPA1/AAAS/RAC1/MYL6/GCN1
ABI1	0.921976	1.35524	0.00502842	1434	tags=18%, list=3%, signal=17%	SMPD4/NCKAP1/CD2AP/HNRNPU/GTF2I/DHX9/INF2/ACTB/RPA1/ACTN4/MYH9/ANP32E/IQGAP1/HNRNPH1/ABI2
AHNAK	0.873813	1.35522	0.0107833	3390	tags=14%, list=6%, signal=13%	MYH9/CD2AP/GTF2I/BRK1/CYFIP1/CNOT1/RNH1/ACTN4/CAPZB/DBN1/FLNB/PPM1F
PPIAP73	0.805709	1.35517	0.0499244	1567	tags=11%, list=3%, signal=10%	FLNA/PML/IPO4/SAFB2/CNOT1/ACTB/ACTG1/RUFY1/SLC3A2
CD47	0.839948	1.35514	0.0176366	1685	tags=17%, list=3%, signal=16%	PML/UBASH3B/SLC2A1/IQGAP1/ACTN4/LRPPRC/CAPZB/CD2AP/DSTN/WASF2/INF2/RNH1/ACTB/ACTG1
AC023794.5	0.870864	1.35512	0.0189099	3270	tags=17%, list=6%, signal=16%	CNOT1/IPO7/SPART/RPA1/IPO4/BRK1/UBASH3B/LRPPRC/NDUFS1/WASF2/ACTN4/DSTN/RPN1/ABI2
PHF5A	0.87435	1.35508	0.0212662	2615	tags=31%, list=5%, signal=30%	ATXN10/HNRNPU/HNRNPM/FANCI/AAAS/HNRNPA3/SMPD4/BOP1/DHX9/SAFB2/DBN1/SART3/PCBP2/ABI2/BRK1/SLC7A11/TRIP6/RRP1/IPO7/STRAP/CD2AP/NDUFS2/SAMM50/CNOT1/PRDX1/IPO4
ARL6IP6	0.932437	1.35505	0.00330036	889	tags=18%, list=2%, signal=18%	HNRNPA3/SMPD4/DHX9/SART3/NCKAP1/ABI2/FANCI/HNRNPU/HNRNPH1/HNRNPM/LRPPRC/ANP32E/RPA1/TARDBP/PRC1
WDR81	0.845127	1.35501	0.0475087	1269	tags=14%, list=2%, signal=14%	RPA1/DHX9/GTF2I/TNKS1BP1/RNH1/CNOT1/SMPD4/MYH10/ACTN4/SQSTM1/HNRNPM/NDUFS2
ITGB5	0.841978	1.35499	0.0219895	3273	tags=17%, list=6%, signal=16%	ATXN10/INF2/ACTG1/TRIP6/HNRNPA3/RNH1/ARMC6/RAC1/SAMM50/DHX9/UBASH3B/GCN1/FANCI/NDUFA10
CUX1	0.825167	1.35497	0.0393064	2815	tags=23%, list=5%, signal=21%	GTF2I/MYH9/CNOT1/NCKAP1/CHCHD3/DHX9/CYFIP1/INF2/ZHX2/ACTG1/SART3/TNKS1BP1/RNH1/MRPS17/GYS1/HNRNPM/WASF2/SLC3A2/ABI2
MIR339	0.768112	1.35494	0.0286058	5820	tags=29%, list=11%, signal=26%	HNRNPH1/FLNA/PRC1/EPAS1/HNRNPM/OXSM/NDUFA11/RPN1/PCBP2/NSUN2/FANCI/SPART/CD2AP/HNRNPA3/ACTC1/CNOT1/SMPD4/TARDBP/TNKS1BP1/FLNB/STRAP/IPO7/GYS1/IPO4
MLF2	0.773254	1.35492	0.0495979	4384	tags=20%, list=8%, signal=19%	STRAP/CHD4/INF2/WASF2/PPM1F/CD2AP/BRK1/MYH10/IPO4/NDUFA10/GCN1/SART3/ACTG2/ACTA2/SLC2A1/AAAS/SLC3A2
POLD1	0.942999	1.35488	0.00279704	1697	tags=19%, list=3%, signal=18%	SMPD4/FANCI/SART3/HNRNPM/HNRNPA3/GCN1/AAAS/RPA1/DHX9/WASF2/PRC1/ACTN4/HNRNPU/FLNA/SLC2A1/ANP32E
PFAS	0.88277	1.35477	0.0092236	2370	tags=26%, list=4%, signal=25%	RPA1/IPO7/GCN1/DHX9/GTF2I/HNRNPM/CNOT1/CD2AP/SART3/AAAS/MYH10/HNRNPH1/SLC3A2/SAMM50/EPAS1/TLN1/RNH1/HNRNPU/TRIP6/NDUFS2/NSUN2/WASF2
RBM4B	0.866549	1.35471	0.0139998	2801	tags=23%, list=5%, signal=22%	HNRNPU/DHX9/AAAS/SART3/ANP32E/SAFB2/PCBP2/SMPD4/SLC3A2/HNRNPM/ACTG1/NLN/TARDBP/ATXN10/ACTC1/GCN1/TRIP6/TNKS1BP1/RUFY1
KIN	0.836685	1.3547	0.0416667	2809	tags=18%, list=5%, signal=17%	SMPD4/HNRNPU/ABI2/ACTG1/FANCI/SAMM50/DHX9/PCBP2/HNRNPM/RPA1/TNKS1BP1/SART3/LRPPRC/RRP1/MYH9
MYO19	0.921401	1.35469	0.00705227	1073	tags=15%, list=2%, signal=15%	FANCI/DHX9/SMPD4/IPO7/HNRNPH1/HNRNPA3/HNRNPU/AAAS/SART3/CNOT1/MYH9/ATXN10/CHCHD3
SUPT16H	0.925254	1.35469	0.00351265	981	tags=18%, list=2%, signal=18%	SART3/DHX9/FANCI/SMPD4/HNRNPU/HNRNPM/HNRNPA3/ACTN4/GCN1/ABI2/HNRNPH1/TARDBP/FLNB/PRC1/IPO7
GNL2	0.846829	1.35463	0.0289687	1918	tags=23%, list=3%, signal=22%	WASF2/TARDBP/HNRNPA3/SLC2A1/GCN1/NSUN2/SAFB2/CD2AP/CAPZB/PCBP2/STRAP/FANCI/MYH9/OXSM/BOP1/HNRNPU/HNRNPM/PRDX1/MYH10
RELA	0.865689	1.35462	0.0278707	2709	tags=26%, list=5%, signal=25%	SART3/DHX9/IPO7/TNKS1BP1/MYH9/HNRNPM/BOP1/RNH1/ACTB/GCN1/ZHX2/ATXN10/BRK1/SLC3A2/HNRNPU/ACTN4/CAPZB/SMPD4/GYS1/LRPPRC/CD2AP/SAMM50
USP28	0.903167	1.35457	0.0136533	2102	tags=20%, list=4%, signal=19%	IPO7/GTF2I/DHX9/CNOT1/HNRNPH1/MYH9/SMPD4/SART3/DSTN/RPA1/HNRNPA3/NSUN2/RUFY1/HNRNPM/TLN1/SLC3A2/HNRNPU
C7orf57	0.899628	1.35457	0.0387701	487	tags=5%, list=1%, signal=5%	HNRNPM/SLC2A1/ACTBL2/GYS1
DNAL1	0.905028	1.35453	0.010814	2334	tags=19%, list=4%, signal=18%	IQGAP1/FLNA/NCKAP1/PML/GYS1/SMPD4/ABI2/ACTN4/MYH9/TNKS1BP1/HNRNPM/HNRNPH1/SQSTM1/CHCHD3/AAAS/ACTG1
AC253536.4	0.944144	1.35452	0.0285533	231	tags=2%, list=0%, signal=2%	SLC2A1/SLC2A3
PCNT	0.84631	1.35448	0.0315315	3377	tags=26%, list=6%, signal=25%	HNRNPH1/GCN1/FANCI/TARDBP/TLN1/FLNB/DHX9/MYH9/PRC1/HNRNPU/NCKAP1/MYH10/RPA1/SAFB2/AAAS/NSUN2/CHD4/CAPZB/UBASH3B/NDUFC1/ABI2/ANP32E
DYRK1B	0.814309	1.35447	0.0330613	3659	tags=19%, list=7%, signal=18%	ABI2/DBN1/STRAP/PPM1F/NDUFA11/AAAS/SAFB2/BOP1/BRK1/PML/ACTN4/WASF2/NUBPL/CYFIP1/TARDBP/GCN1
SIGLEC10-AS1	0.919428	1.35444	0.019804	3245	tags=18%, list=6%, signal=17%	GCN1/DBN1/IPO4/ACTG1/CAPZB/HNRNPH1/SLC2A1/NCKAP1/STRAP/PCBP2/RNH1/CD2AP/TNKS1BP1/MRPS17/SQSTM1
RNF227	0.863934	1.35443	0.0257017	1089	tags=14%, list=2%, signal=14%	ABI2/ACTG1/RPA1/AAAS/INF2/FANCI/CD2AP/HNRNPM/EPAS1/SAFB2/TARDBP/PPM1F
DHX57	0.91004	1.35441	0.00343144	1243	tags=23%, list=2%, signal=22%	HNRNPU/SART3/RPA1/HNRNPM/SMPD4/DHX9/RUFY1/GCN1/LRPPRC/SAMM50/IPO7/BOP1/CYFIP1/ANP32E/HNRNPA3/TARDBP/CAPZB/ZHX2/NUBPL
AL021707.1	0.754886	1.3544	0.0365497	4681	tags=18%, list=8%, signal=16%	PRC1/LRPPRC/NDUFA11/SAMM50/RRP1/CHD4/SQSTM1/GTF2I/TLN1/NSUN2/ACTBL2/SLC2A1/SPART/NLN/EPAS1
NCOR2	0.900849	1.35439	0.00584051	2791	tags=24%, list=5%, signal=23%	SART3/GCN1/ACTN4/HNRNPM/DHX9/HNRNPU/SMPD4/GYS1/CYFIP1/SAFB2/FLNA/STRAP/EPAS1/MYH9/GTF2I/PCBP2/NSUN2/BOP1/TNKS1BP1/ACTG1
NAPEPLD	0.862784	1.35432	0.0230139	1669	tags=14%, list=3%, signal=14%	CNOT1/ACTN4/GTF2I/TNKS1BP1/TARDBP/SMPD4/ACTB/DHX9/ATXN10/CYFIP1/ARMC6/IPO7
PASK	0.873534	1.35429	0.012397	2256	tags=20%, list=4%, signal=19%	ABI2/FANCI/SART3/HNRNPA3/HNRNPH1/ANP32E/SMPD4/PCBP2/SAFB2/NSUN2/WASF2/ACTA1/PDLIM1/TARDBP/NDUFS1/GCN1/HNRNPU
AC087683.1	0.852622	1.35428	0.0261729	2053	tags=10%, list=4%, signal=9%	ABI2/SART3/HNRNPU/ACTA2/HNRNPH1/OXSM/HNRNPA3/GTF2I
SMG5	0.860247	1.35425	0.0278087	3768	tags=23%, list=7%, signal=21%	GCN1/PPM1F/RRP1/CNOT1/SMPD4/PML/SAMM50/NDUFS2/WASF2/PDLIM1/BOP1/MYH9/RAC1/MYH10/GTF2I/FANCI/ACTA2/RPA1/ANP32E
AKIRIN2	0.79726	1.3542	0.0422886	2395	tags=18%, list=4%, signal=17%	HNRNPA3/HNRNPU/BOP1/PCBP2/IPO7/SMPD4/CAPZB/NUBPL/PRC1/RUFY1/TARDBP/FLNB/IPO4/NDUFS1/AAAS
AC145207.5	0.849217	1.35416	0.0331151	1693	tags=17%, list=3%, signal=16%	GCN1/FANCI/HNRNPA3/ABI2/PRC1/HNRNPH1/LRPPRC/NDUFA11/HNRNPM/CHD4/PPM1F/RRP1/TARDBP/SART3
APH1B	0.80182	1.35416	0.0343494	5455	tags=25%, list=10%, signal=23%	ABI2/HNRNPA3/FLNA/ACTB/IQGAP1/NUBPL/BRK1/UBASH3B/CHD4/RNH1/PML/RPA1/RAC1/TNKS1BP1/MRPS17/ACTC1/CAPZB/FLNB/SLC2A3/GTF2I/IPO4
ARPC5	0.846728	1.35415	0.0375427	2694	tags=15%, list=5%, signal=15%	ANP32E/HNRNPU/RAC1/CD2AP/ATXN10/ACTB/WASF2/GTF2I/HNRNPA3/RPA1/ACTN4/CAPZB/PDLIM1
MFSD1	0.881242	1.35408	0.0109367	4007	tags=25%, list=7%, signal=23%	GTF2I/IQGAP1/CYFIP1/CNOT1/FLNA/NCKAP1/NDUFA11/NDUFS2/DHX9/PRDX1/ATXN10/MYH10/ANP32E/SART3/ACTA2/ACTB/RPA1/NUBPL/STRAP/RPN1/DSTN
MTA1	0.923929	1.35408	0.00225485	1347	tags=19%, list=2%, signal=19%	HNRNPH1/GTF2I/DHX9/SMPD4/SART3/AAAS/ACTN4/HNRNPM/TLN1/HNRNPU/SAFB2/ACTA1/HNRNPA3/CNOT1/RUFY1/ACTG1
BRCC3	0.868752	1.35403	0.0171114	2221	tags=20%, list=4%, signal=19%	DHX9/HNRNPU/RPA1/GTF2I/NDUFS1/NCKAP1/IPO7/CD2AP/LRPPRC/INF2/CYFIP1/TLN1/HNRNPH1/ACTA2/SART3/NUBPL/AAAS
TP53I3	0.791623	1.35401	0.0325	2064	tags=11%, list=4%, signal=10%	PCBP2/ABI2/HNRNPM/BRK1/RRP1/AAAS/SAMM50/MYL6/RNH1
SH3BP5	0.903717	1.354	0.0051999	3700	tags=17%, list=7%, signal=16%	CNOT1/GTF2I/SPART/EPAS1/NUBPL/TLN1/MYH9/ZHX2/ACTG1/FLNA/NSUN2/PCBP2/SAMM50/MYH10
CS	0.87764	1.35395	0.00784178	3095	tags=27%, list=6%, signal=26%	GCN1/HNRNPU/SART3/RPA1/LRPPRC/SMPD4/DHX9/IPO7/ACTN4/NCKAP1/HNRNPM/RAC1/SLC3A2/SAMM50/DBN1/GYS1/TLN1/PPM1F/BRK1/AAAS/OXSM/PRDX1/ANP32E
AP000648.4	0.890417	1.35394	0.00932914	2628	tags=18%, list=5%, signal=17%	HNRNPH1/SMPD4/ABI2/HNRNPU/GCN1/HNRNPA3/TARDBP/LRPPRC/RAC1/CNOT1/SART3/IPO7/ACTB/RUFY1/EPAS1
Z83840.1	0.789898	1.35393	0.0416667	4218	tags=25%, list=8%, signal=23%	DHX9/SART3/IPO7/HNRNPH1/SMPD4/RAC1/GCN1/ATXN10/MRPS17/RPN1/MYH9/HNRNPU/SLC2A1/STRAP/GYS1/NDUFS2/NCKAP1/AAAS/DSTN/HNRNPA3/FANCI
AL513128.1	0.999964	1.35393	0.000728734	3	tags=1%, list=0%, signal=1%	PPM1F
BCL10	0.882699	1.35389	0.0186113	1905	tags=24%, list=3%, signal=23%	SART3/NCKAP1/HNRNPU/IQGAP1/FANCI/CAPZB/HNRNPA3/TLN1/DHX9/SAFB2/ACTBL2/SLC2A1/CHCHD3/SLC2A3/CD2AP/GYS1/ACTG1/HNRNPH1/NDUFA11/ACTN4
SFT2D2	0.875806	1.35382	0.0258083	2269	tags=20%, list=4%, signal=19%	HNRNPU/DHX9/NCKAP1/SMPD4/LRPPRC/ACTN4/CD2AP/TNKS1BP1/TLN1/WASF2/HNRNPM/PPM1F/RAC1/CYFIP1/ANP32E/EPAS1/PML
RDX	0.913428	1.35377	0.00369544	964	tags=12%, list=2%, signal=12%	CNOT1/GTF2I/DHX9/IPO7/EPAS1/CYFIP1/NDUFA11/CHD4/RPN1/NCKAP1
PEMT	0.77645	1.35365	0.0395062	1773	tags=15%, list=3%, signal=15%	PDLIM1/DSTN/NCKAP1/SLC2A1/PRC1/ACTG1/ATXN10/SLC7A11/ZHX2/STRAP/TRIP6/SAMM50/RUFY1
FOXK1	0.870836	1.3536	0.03386	3670	tags=31%, list=7%, signal=29%	WASF2/PPM1F/SMPD4/UBASH3B/DHX9/TARDBP/HNRNPA3/MYH9/RPA1/STRAP/RAC1/TLN1/LRPPRC/CHCHD3/IPO7/GYS1/NSUN2/CAPZB/NDUFA10/PRDX1/DBN1/AAAS/BOP1/SLC2A1/SLC3A2/IQGAP1
AL035458.1	0.86713	1.35359	0.0187512	2431	tags=25%, list=4%, signal=24%	SART3/GCN1/CNOT1/DHX9/SMPD4/MYH10/CHCHD3/HNRNPM/FANCI/RPN1/CAPZB/IPO7/SAFB2/ABI2/CYFIP1/LRPPRC/RUFY1/UBASH3B/NUBPL/NSUN2/NCKAP1
PSPC1	0.869817	1.35355	0.0154396	2073	tags=20%, list=4%, signal=20%	SAFB2/DHX9/RPA1/ABI2/HNRNPA3/HNRNPM/HNRNPU/PRC1/SMPD4/HNRNPH1/DBN1/RNH1/ANP32E/SART3/GYS1/NDUFS1/SLC2A3
POLR1A	0.902152	1.35352	0.00900958	1558	tags=23%, list=3%, signal=22%	DHX9/GCN1/NCKAP1/SMPD4/SART3/LRPPRC/IPO7/CNOT1/TARDBP/ACTN4/SLC7A11/HNRNPU/NDUFS1/ARMC6/NLN/GYS1/PPM1F/SQSTM1/NDUFA10
DNAJB6	0.843154	1.3535	0.0340136	1889	tags=24%, list=3%, signal=23%	WASF2/IPO7/HNRNPM/BOP1/CHCHD3/DBN1/MYH9/HNRNPA3/DHX9/CAPZB/SLC7A11/CD2AP/LRPPRC/TARDBP/RAC1/NCKAP1/GCN1/SMPD4/MYL6/CHD4
DNAJA1	0.792425	1.35349	0.0346106	3298	tags=14%, list=6%, signal=13%	TLN1/TARDBP/RPA1/GCN1/STRAP/HNRNPM/NDUFA10/FLNB/BRK1/UBASH3B/TRIP6/IPO7
CCND2P1	0.846756	1.35346	0.0318182	3419	tags=11%, list=6%, signal=10%	ACTG1/DBN1/MRPS17/FLNB/ATXN10/TNKS1BP1/SLC2A1/NCKAP1/CD2AP
PRELID3B	0.874345	1.35337	0.0164432	2849	tags=25%, list=5%, signal=24%	HNRNPA3/FANCI/HNRNPU/NCKAP1/IPO7/SART3/HNRNPH1/DHX9/IQGAP1/NSUN2/ANP32E/PRC1/CD2AP/TLN1/ACTB/HNRNPM/OXSM/ATXN10/TRIP6/RUFY1/NDUFS1
GBF1	0.913391	1.35334	0.00780311	1372	tags=18%, list=2%, signal=17%	CNOT1/SART3/HNRNPU/GCN1/DHX9/SMPD4/ACTN4/MYH9/FLNB/NCKAP1/SQSTM1/SAFB2/GTF2I/TLN1/INF2
LBR	0.876876	1.35333	0.0172951	2701	tags=29%, list=5%, signal=27%	DHX9/HNRNPU/LRPPRC/HNRNPA3/SMPD4/ANP32E/RPA1/SART3/ABI2/ATXN10/NCKAP1/SLC3A2/TARDBP/ARMC6/HNRNPM/FLNB/DBN1/WASF2/CD2AP/HNRNPH1/PRDX1/ZHX2/RPN1/CHD4
TRA2B	0.933079	1.35332	0.00473687	1171	tags=21%, list=2%, signal=21%	HNRNPU/HNRNPA3/FANCI/DHX9/SMPD4/HNRNPM/HNRNPH1/SART3/ABI2/RPA1/TARDBP/ANP32E/NCKAP1/WASF2/IPO7/CAPZB/CD2AP/ARMC6
PRB3	0.904389	1.3533	0.0396601	1105	tags=11%, list=2%, signal=11%	TARDBP/FANCI/SMPD4/DHX9/INF2/STRAP/SLC2A3/CYFIP1/EPAS1
LUC7L3	0.886772	1.35329	0.0181162	2968	tags=21%, list=5%, signal=20%	HNRNPH1/SART3/ABI2/HNRNPA3/DHX9/HNRNPU/SMPD4/ANP32E/AAAS/TARDBP/PRC1/NDUFS1/RPA1/IPO7/RUFY1/TLN1/STRAP/ACTA1
PSMA1	0.871888	1.35327	0.025849	1357	tags=8%, list=2%, signal=8%	CHD4/MYL6/TARDBP/GTF2I/CNOT1/BRK1/HNRNPA3
TM4SF1	0.818022	1.35314	0.0344617	3985	tags=18%, list=7%, signal=17%	UBASH3B/DSTN/FLNA/IQGAP1/TNKS1BP1/SLC7A11/RAC1/CAPZB/BRK1/INF2/SLC2A1/ACTC1/RRP1/MYL6/RNH1
DANCR	0.790689	1.35311	0.0145046	4840	tags=25%, list=9%, signal=23%	SLC2A1/GYS1/PCBP2/ARMC6/RRP1/SMPD4/LRPPRC/CYFIP1/INF2/NSUN2/PPM1F/ACTG2/CHCHD3/SPART/RNH1/IPO7/OXSM/RPA1/NDUFA11/CD2AP/HNRNPU
HNRNPU	0.956244	1.35308	0.000548726	1149	tags=18%, list=2%, signal=18%	HNRNPA3/DHX9/HNRNPM/SMPD4/TARDBP/RPA1/IPO7/SART3/CD2AP/PCBP2/HNRNPH1/FANCI/RUFY1/ANP32E/LRPPRC
UBTD2	0.852633	1.35305	0.0151127	2648	tags=20%, list=5%, signal=19%	ABI2/SART3/HNRNPA3/HNRNPH1/HNRNPM/NCKAP1/CHD4/FANCI/ANP32E/IPO7/CYFIP1/RUFY1/TNKS1BP1/SLC3A2/MYH9/DBN1/FLNA
AP1S3	0.861321	1.35303	0.0166518	2291	tags=11%, list=4%, signal=10%	IQGAP1/FANCI/UBASH3B/ABI2/GYS1/CD2AP/ACTG1/NDUFC1/DSTN
AC027176.2	0.816492	1.35302	0.0402685	3351	tags=21%, list=6%, signal=20%	HNRNPH1/HNRNPA3/SMPD4/WASF2/IPO7/LRPPRC/NUBPL/EPAS1/FANCI/CNOT1/MYH10/NSUN2/PCBP2/RUFY1/ACTN4/SPART/OXSM/TRIP6
LSM3	0.838303	1.35294	0.0315789	2268	tags=17%, list=4%, signal=16%	BRK1/MYL6/TARDBP/AAAS/CHD4/ABI2/SAMM50/ACTN4/RPN1/NDUFC1/PPM1F/EPAS1/SPART/LRPPRC
TAGLN	0.917434	1.35291	0.0403135	1079	tags=6%, list=2%, signal=6%	ACTA2/ACTG2/FLNA/ANP32E/ACTG1
FAM156A	0.837109	1.35285	0.0336374	3829	tags=24%, list=7%, signal=22%	DHX9/GCN1/RPA1/FANCI/SAMM50/HNRNPM/STRAP/FLNA/DSTN/SMPD4/NDUFC1/MYL6/SLC3A2/RUFY1/NSUN2/OXSM/WASF2/HNRNPH1/PPM1F/ABI2
RAD23A	0.880413	1.3528	0.0133189	3259	tags=30%, list=6%, signal=28%	SMPD4/ACTN4/DHX9/TLN1/RPA1/CNOT1/SLC7A11/GTF2I/CHCHD3/IPO7/DBN1/NDUFC1/ANP32E/ACTB/RAC1/ACTA1/SART3/SLC2A1/SLC3A2/EPAS1/ACTG2/HNRNPH1/RRP1/RUFY1/ARMC6
ZNF574	0.879265	1.35277	0.0310885	1746	tags=19%, list=3%, signal=18%	SMPD4/ACTN4/HNRNPM/SAFB2/SART3/DHX9/AAAS/FLNA/ACTG1/ABI2/RNH1/FLNB/TNKS1BP1/RPN1/CNOT1/GYS1
FBXW4	0.819123	1.35271	0.041866	3575	tags=20%, list=6%, signal=19%	MYL6/RRP1/PDLIM1/PPM1F/HNRNPH1/RNH1/AAAS/MRPS17/OXSM/TNKS1BP1/DBN1/FLNA/RUFY1/SQSTM1/STRAP/CHD4/IPO7
SMIM12	0.815925	1.35271	0.0364277	3326	tags=23%, list=6%, signal=21%	MYL6/PRDX1/CAPZB/CHCHD3/PPM1F/TNKS1BP1/SPART/BRK1/DBN1/WASF2/OXSM/NDUFS2/CD2AP/NDUFA10/STRAP/DSTN/TARDBP/LRPPRC/ACTG2
NONO	0.922353	1.35269	0.0037563	1759	tags=24%, list=3%, signal=23%	SART3/SMPD4/RPA1/HNRNPU/LRPPRC/DHX9/HNRNPM/HNRNPH1/IPO7/FANCI/TARDBP/PCBP2/PPM1F/ATXN10/WASF2/GYS1/HNRNPA3/NDUFA10/SAMM50/NSUN2
MTHFD1L	0.861963	1.35266	0.0154226	2471	tags=19%, list=4%, signal=18%	TARDBP/ACTG1/DBN1/ACTB/RAC1/FLNA/UBASH3B/BOP1/DHX9/BRK1/SLC3A2/PML/CHD4/RRP1/PCBP2/IPO4
FAM98B	0.907957	1.35265	0.00309283	1630	tags=30%, list=3%, signal=29%	IQGAP1/SART3/CYFIP1/SMPD4/HNRNPM/HNRNPA3/CD2AP/HNRNPU/HNRNPH1/ABI2/DHX9/FANCI/PML/NLN/FLNA/ACTG1/INF2/EPAS1/RUFY1/SLC2A1/GYS1/AAAS/MYH9/ATXN10/STRAP
AC123768.1	0.768406	1.35262	0.0385144	1245	tags=11%, list=2%, signal=10%	AAAS/CNOT1/HNRNPH1/SART3/FANCI/PRC1/ZHX2/TLN1/HNRNPA3
PIP4P1	0.82892	1.35259	0.0248294	2816	tags=18%, list=5%, signal=17%	ANP32E/SART3/SMPD4/AAAS/MYL6/SAFB2/PCBP2/MYH10/RNH1/STRAP/SQSTM1/FLNB/RUFY1/PRDX1/ARMC6
TEFM	0.872233	1.35257	0.0159879	1936	tags=18%, list=4%, signal=17%	SMPD4/DHX9/HNRNPU/FANCI/RPA1/LRPPRC/SART3/TLN1/MYH10/ABI2/IPO7/GTF2I/NDUFS1/PRC1/NDUFA11
LINC02539	0.914418	1.35248	0.0285885	465	tags=2%, list=1%, signal=2%	WASF2/IPO4
UFSP2	0.824925	1.35242	0.0337602	2838	tags=19%, list=5%, signal=18%	CNOT1/CYFIP1/NDUFC1/RNH1/STRAP/DHX9/TLN1/NSUN2/ANP32E/NUBPL/IQGAP1/OXSM/FLNB/FLNA/BRK1/RUFY1
ST13	0.836584	1.35241	0.0455607	1685	tags=18%, list=3%, signal=17%	ATXN10/IPO7/MYH9/SAMM50/CYFIP1/LRPPRC/ACTN4/DHX9/AAAS/HNRNPU/SMPD4/NDUFA11/PPM1F/WASF2/SLC3A2
RAB35	0.916714	1.35237	0.00375115	2347	tags=25%, list=4%, signal=24%	SART3/DHX9/GCN1/HNRNPM/IQGAP1/AAAS/HNRNPU/RPA1/CAPZB/FANCI/RAC1/WASF2/TARDBP/CYFIP1/STRAP/MYH9/ACTB/NDUFC1/CNOT1/TNKS1BP1/DBN1
SCAF1	0.87773	1.35236	0.0324074	2043	tags=20%, list=4%, signal=20%	SAFB2/SMPD4/ACTN4/GYS1/HNRNPU/RRP1/ACTG1/ABI2/AAAS/HNRNPM/DHX9/PPM1F/PCBP2/CHD4/PML/HNRNPA3/RAC1
RAB11B-AS1	0.808639	1.35235	0.030647	3327	tags=24%, list=6%, signal=22%	HNRNPM/GTF2I/INF2/SART3/NDUFA11/ABI2/ANP32E/OXSM/CNOT1/NCKAP1/FLNA/ACTB/ACTG1/GYS1/SLC2A1/NDUFA10/PML/HNRNPH1/RPA1/EPAS1
PABPC1	0.885764	1.35234	0.0404157	2941	tags=17%, list=5%, signal=16%	BOP1/ZHX2/PPM1F/PDLIM1/LRPPRC/EPAS1/PRDX1/IPO7/MRPS17/NLN/RAC1/WASF2/ACTB/SAMM50
PCIF1	0.877683	1.35231	0.0212662	3663	tags=29%, list=7%, signal=27%	HNRNPM/HNRNPA3/SMPD4/ACTN4/ATXN10/HNRNPU/CD2AP/PRC1/FANCI/CHCHD3/SART3/DHX9/NCKAP1/SAFB2/RPN1/GYS1/RPA1/DSTN/SLC7A11/GTF2I/BRK1/FLNB/TRIP6/SLC3A2
MZF1	0.835964	1.35221	0.0202657	4296	tags=23%, list=8%, signal=21%	SAFB2/AAAS/GYS1/SMPD4/ABI2/DBN1/TNKS1BP1/ARMC6/SART3/NDUFS2/RNH1/FANCI/RPN1/ACTB/PDLIM1/HNRNPA3/ACTG1/MRPS17/SQSTM1
KNTC1	0.956292	1.35218	0.00343067	619	tags=11%, list=1%, signal=11%	FANCI/SMPD4/HNRNPA3/SART3/HNRNPH1/HNRNPU/ANP32E/PRC1/RPA1
TTLL5	0.897545	1.35215	0.0125356	1363	tags=23%, list=2%, signal=22%	DHX9/SMPD4/ABI2/SART3/HNRNPU/HNRNPM/WASF2/NCKAP1/AAAS/HNRNPA3/ANP32E/MYH9/FLNA/HNRNPH1/IPO7/MYL6/RPN1/CYFIP1/CNOT1
AC016687.2	0.848707	1.35215	0.0418886	4787	tags=18%, list=9%, signal=16%	TRIP6/TARDBP/NDUFA10/LRPPRC/RUFY1/GTF2I/PRC1/PDLIM1/ACTA2/SAMM50/MYH10/SPART/NDUFS2/ACTB/ACTBL2
TAX1BP3	0.845391	1.3521	0.033121	2742	tags=19%, list=5%, signal=18%	DSTN/FLNA/GYS1/ABI2/SPART/SAFB2/RPA1/ACTN4/DHX9/UBASH3B/DBN1/INF2/LRPPRC/AAAS/NSUN2/ANP32E
RPA1	0.899318	1.35204	0.00997928	1799	tags=28%, list=3%, signal=27%	DHX9/SART3/AAAS/HNRNPM/CNOT1/TARDBP/HNRNPU/MYH10/NCKAP1/PPM1F/SMPD4/FLNB/ABI2/NDUFA10/TLN1/HNRNPA3/LRPPRC/ACTN4/FANCI/EPAS1/ANP32E/MYH9/NDUFA11
AL450326.1	0.883286	1.35201	0.0144544	2663	tags=18%, list=5%, signal=17%	GTF2I/CYFIP1/CNOT1/NCKAP1/NDUFS1/FANCI/MYH9/SQSTM1/NDUFA11/ACTA1/MYH10/DHX9/ATXN10/ARMC6/LRPPRC
UBE2G1	0.886161	1.35201	0.0290179	2147	tags=23%, list=4%, signal=22%	RPA1/DHX9/CYFIP1/HNRNPU/MYH10/SPART/IPO7/RRP1/SART3/TNKS1BP1/SMPD4/NDUFA10/NDUFS2/EPAS1/FANCI/STRAP/FLNA/DBN1/ABI2
PARL	0.894809	1.35195	0.00972454	1515	tags=12%, list=3%, signal=12%	CHD4/MYL6/NDUFA11/BRK1/CNOT1/NCKAP1/GTF2I/RRP1/RUFY1/FLNA
AC098583.2	0.999491	1.35193	0.0270258	29	tags=1%, list=0%, signal=1%	RAC1
XRCC5	0.904749	1.35182	0.00470761	1837	tags=24%, list=3%, signal=23%	DHX9/RPA1/HNRNPU/HNRNPM/TARDBP/HNRNPA3/LRPPRC/MYH9/SMPD4/TLN1/NDUFA10/HNRNPH1/ABI2/CYFIP1/STRAP/NCKAP1/RUFY1/ACTN4/WASF2/PRC1
MCPH1-AS1	0.848124	1.35177	0.0357616	2204	tags=13%, list=4%, signal=13%	HNRNPU/DHX9/CYFIP1/IQGAP1/NDUFS1/MYL6/MYH10/ANP32E/TRIP6/ACTA2/ACTG1
LASP1	0.877718	1.35177	0.0106028	2839	tags=30%, list=5%, signal=28%	SMPD4/HNRNPU/SART3/GCN1/WASF2/DHX9/FLNB/HNRNPH1/INF2/ACTN4/MYH9/CNOT1/DBN1/TLN1/RNH1/IPO4/CYFIP1/TNKS1BP1/AAAS/NCKAP1/SLC3A2/PRC1/FANCI/ZHX2/PPM1F
ALDH3A2	0.795696	1.3517	0.0434783	4959	tags=18%, list=9%, signal=16%	NUBPL/NDUFA11/MRPS17/OXSM/DBN1/ABI2/SAMM50/GCN1/SPART/GTF2I/PPM1F/RRP1/SLC2A3/SAFB2/DSTN
NPM1P39	0.846782	1.35169	0.0267962	2415	tags=15%, list=4%, signal=15%	LRPPRC/IPO7/RUFY1/RPA1/HNRNPU/HNRNPM/STRAP/RNH1/MYL6/CYFIP1/PCBP2/NDUFA10/CHD4
IPPK	0.927485	1.35168	0.0112493	1008	tags=11%, list=2%, signal=11%	GTF2I/CNOT1/SART3/DHX9/TLN1/IPO7/EPAS1/NDUFA11/NDUFS1
NAT10	0.906053	1.35167	0.00395935	2662	tags=24%, list=5%, signal=23%	SMPD4/HNRNPU/HNRNPM/GCN1/SART3/DHX9/IPO7/ACTG1/LRPPRC/BOP1/OXSM/ATXN10/AAAS/HNRNPA3/MYH9/RAC1/BRK1/CHCHD3/PPM1F/DSTN
EML4	0.85156	1.3516	0.012627	3417	tags=27%, list=6%, signal=26%	HNRNPA3/LRPPRC/NCKAP1/SART3/HNRNPU/DHX9/SMPD4/CAPZB/ABI2/FANCI/RUFY1/HNRNPM/IPO7/FLNB/SLC7A11/PCBP2/GYS1/IQGAP1/EPAS1/ACTA2/SPART/TLN1/CYFIP1
NR2C1	0.858515	1.3516	0.0203831	1148	tags=13%, list=2%, signal=13%	SART3/HNRNPH1/SMPD4/HNRNPA3/FANCI/TARDBP/HNRNPU/ABI2/GCN1/GYS1/RRP1
PAIP2	0.873976	1.3516	0.0315541	2786	tags=27%, list=5%, signal=26%	PRDX1/HNRNPU/CHCHD3/DHX9/NSUN2/LRPPRC/HNRNPM/MYH9/RUFY1/ATXN10/NLN/BOP1/SQSTM1/IPO7/RNH1/RPA1/SLC3A2/CYFIP1/OXSM/MRPS17/CD2AP/SLC2A3/ACTA2
AC007688.3	0.915151	1.35154	0.0400616	2859	tags=6%, list=5%, signal=6%	ACTG2/NDUFS1/NLN/SQSTM1/SLC3A2
AP2B1	0.872024	1.35141	0.029234	3772	tags=25%, list=7%, signal=23%	DHX9/IPO7/ATXN10/SQSTM1/CNOT1/LRPPRC/HNRNPU/NDUFS1/TLN1/GCN1/NUBPL/RPA1/ACTN4/ANP32E/CD2AP/ZHX2/CYFIP1/SAMM50/RAC1/ACTB/NDUFS2
ACBD5	0.85051	1.3514	0.0299339	1493	tags=14%, list=3%, signal=14%	CNOT1/CYFIP1/NDUFS1/GTF2I/NCKAP1/NDUFS2/NSUN2/NUBPL/STRAP/UBASH3B/EPAS1/NLN
DPH3	0.786622	1.3513	0.0461725	3707	tags=24%, list=7%, signal=22%	OXSM/STRAP/PCBP2/HNRNPU/HNRNPM/TLN1/BRK1/HNRNPA3/CAPZB/ATXN10/GTF2I/PRDX1/RPA1/IQGAP1/DHX9/ACTB/PDLIM1/MRPS17/MYL6/ZHX2
PCYOX1	0.86558	1.35127	0.0263736	3865	tags=21%, list=7%, signal=20%	GTF2I/CNOT1/NDUFS1/TNKS1BP1/UBASH3B/MYH10/NUBPL/DSTN/SLC3A2/HNRNPU/GYS1/ZHX2/ACTG2/NDUFC1/IPO7/PPM1F/EPAS1/NCKAP1
IFT22	0.853249	1.35126	0.0185174	2568	tags=21%, list=5%, signal=20%	CHCHD3/DHX9/STRAP/ACTN4/RPN1/PCBP2/IQGAP1/DBN1/RNH1/SART3/WASF2/HNRNPU/PRDX1/TNKS1BP1/ATXN10/DSTN/FANCI/RAC1
DAG1	0.822273	1.35124	0.0431235	2469	tags=18%, list=4%, signal=17%	MYH9/CNOT1/ACTN4/DHX9/NCKAP1/CYFIP1/NDUFS2/OXSM/IPO7/SQSTM1/LRPPRC/CHD4/INF2/TLN1/FANCI
PTCD3	0.875816	1.35121	0.00896312	1873	tags=23%, list=3%, signal=22%	SMPD4/NCKAP1/LRPPRC/SART3/RPA1/CNOT1/IPO7/PCBP2/HNRNPU/HNRNPA3/GTF2I/NSUN2/CHCHD3/NDUFS1/NDUFA10/OXSM/PDLIM1/MYH9/GYS1
MAN2B1	0.878046	1.3512	0.00563912	3330	tags=26%, list=6%, signal=25%	MYH9/ACTN4/HNRNPH1/TLN1/SMPD4/GTF2I/NCKAP1/DHX9/HNRNPM/IQGAP1/GCN1/PPM1F/FLNA/RNH1/HNRNPU/CNOT1/ACTA1/INF2/SAFB2/SLC2A3/FLNB/EPAS1
STAC	0.87904	1.35113	0.0180139	2906	tags=17%, list=5%, signal=16%	PRDX1/ACTB/CAPZB/ACTBL2/BOP1/PPM1F/SLC7A11/SMPD4/MRPS17/BRK1/UBASH3B/PML/RNH1/FLNA
MOGS	0.847306	1.35112	0.0107458	1053	tags=19%, list=2%, signal=19%	SMPD4/DHX9/RPN1/TARDBP/HNRNPH1/HNRNPU/GCN1/HNRNPA3/SAFB2/RUFY1/CAPZB/LRPPRC/HNRNPM/WASF2/FANCI/ANP32E
CFAP298	0.851223	1.35111	0.0255945	3747	tags=18%, list=7%, signal=17%	RRP1/NDUFA11/CHD4/MYL6/CYFIP1/TARDBP/RNH1/ARMC6/HNRNPH1/GYS1/BRK1/STRAP/SAFB2/ACTG1/RAC1
HDAC2	0.913389	1.351	0.00784595	1272	tags=15%, list=2%, signal=15%	HNRNPU/HNRNPA3/TARDBP/HNRNPM/ACTG1/SART3/HNRNPH1/ABI2/RPA1/DHX9/SAFB2/AAAS/SMPD4
RBM19	0.857396	1.3509	0.0134413	3164	tags=31%, list=6%, signal=29%	SART3/GCN1/HNRNPA3/HNRNPU/HNRNPH1/AAAS/ANP32E/NLN/PRDX1/IPO7/UBASH3B/WASF2/SLC7A11/SMPD4/PPM1F/ZHX2/NSUN2/STRAP/ACTB/ARMC6/LRPPRC/GTF2I/SLC3A2/FANCI/CAPZB/PCBP2
NPHP4	0.786848	1.35089	0.0346658	2822	tags=15%, list=5%, signal=15%	TARDBP/SAFB2/FLNA/IQGAP1/WASF2/INF2/SMPD4/PML/CD2AP/HNRNPU/HNRNPM/AAAS/SLC7A11
PTBP1	0.941374	1.35086	0.000285996	772	tags=18%, list=1%, signal=18%	SMPD4/SAFB2/SART3/HNRNPU/HNRNPM/DHX9/HNRNPA3/AAAS/ANP32E/RPA1/HNRNPH1/ACTN4/ABI2/GYS1/PCBP2
KLHL2P1	0.807349	1.35085	0.0246693	604	tags=10%, list=1%, signal=9%	GTF2I/CNOT1/ZHX2/CHCHD3/SQSTM1/HNRNPM/FLNB/ABI2
SPPL2B	0.837324	1.3508	0.0427252	2504	tags=21%, list=5%, signal=20%	SAFB2/GYS1/NDUFA11/SART3/HNRNPM/SQSTM1/INF2/TNKS1BP1/NLN/PPM1F/BOP1/CD2AP/NDUFS1/AAAS/RRP1/RPN1/IPO4/FLNB
GDF10	0.876469	1.35069	0.0411879	1915	tags=11%, list=3%, signal=10%	DBN1/ATXN10/ARMC6/HNRNPM/STRAP/ACTA1/DSTN/SLC3A2/SQSTM1
AGBL3	0.824385	1.35068	0.0393659	3108	tags=14%, list=6%, signal=14%	ABI2/LRPPRC/ACTN4/ACTG1/IPO7/HNRNPU/DHX9/STRAP/RUFY1/ZHX2/NDUFA10/CNOT1
RNF7	0.845163	1.35068	0.020035	4097	tags=25%, list=7%, signal=23%	BRK1/PCBP2/CAPZB/CHD4/SMPD4/MYL6/TARDBP/LRPPRC/ZHX2/NDUFA10/DSTN/SAFB2/NDUFC1/GYS1/OXSM/AAAS/HNRNPU/ACTC1/STRAP/IQGAP1/MYH10
FECH	0.827003	1.35067	0.0319999	3017	tags=14%, list=5%, signal=14%	CNOT1/GTF2I/NCKAP1/NUBPL/LRPPRC/HNRNPH1/FLNA/NDUFS2/ABI2/SLC2A1/ACTG1/SQSTM1
OTUD3	0.889676	1.35065	0.0098598	2810	tags=21%, list=5%, signal=20%	HNRNPH1/PRC1/SMPD4/SAFB2/SART3/HNRNPA3/MYH9/FANCI/GYS1/BRK1/CAPZB/HNRNPM/ACTN4/GCN1/LRPPRC/ACTBL2/NDUFS1/EPAS1
AC017116.2	0.79686	1.3506	0.0481928	3342	tags=14%, list=6%, signal=13%	TARDBP/HNRNPH1/SMPD4/SART3/PPM1F/RPN1/IPO4/AAAS/GCN1/PRC1/GTF2I/ARMC6
PUS3	0.747869	1.35055	0.0493333	5547	tags=32%, list=10%, signal=29%	NLN/EPAS1/ATXN10/NDUFA10/SMPD4/FLNB/RNH1/INF2/SPART/SAMM50/CYFIP1/PML/RUFY1/IPO7/NDUFS1/ACTB/GTF2I/SLC2A1/MYH10/MRPS17/NDUFC1/ACTA2/SLC7A11/TNKS1BP1/TRIP6/PRDX1/BOP1
DNAJC10	0.8714	1.35055	0.0128686	2269	tags=19%, list=4%, signal=18%	HNRNPA3/HNRNPU/ABI2/HNRNPM/NCKAP1/SART3/SMPD4/TARDBP/FLNA/CD2AP/DSTN/IPO7/ACTG1/GTF2I/NDUFS1/RNH1
RANBP3	0.893958	1.35046	0.031355	1530	tags=18%, list=3%, signal=17%	SAFB2/DHX9/SMPD4/HNRNPM/RPA1/HNRNPA3/ACTN4/SART3/AAAS/NDUFA11/ABI2/GTF2I/GCN1/GYS1/ACTG1
MAGEF1	0.845821	1.35044	0.0266506	1119	tags=13%, list=2%, signal=13%	HNRNPH1/ATXN10/HNRNPU/SMPD4/HNRNPA3/SART3/CHD4/CD2AP/FLNB/TARDBP/ABI2
IQGAP2	0.893387	1.35038	0.0049757	2401	tags=19%, list=4%, signal=18%	CNOT1/GTF2I/GYS1/CHD4/NUBPL/NDUFS1/BOP1/TRIP6/PDLIM1/EPAS1/SAMM50/MYH10/NLN/IPO7/ACTA1/MRPS17
PPT1	0.870592	1.35036	0.0176583	1724	tags=20%, list=3%, signal=20%	TARDBP/FANCI/BRK1/IQGAP1/HNRNPM/PRDX1/WASF2/ACTG1/PML/CAPZB/SMPD4/RNH1/HNRNPH1/CHCHD3/ANP32E/ACTA1/PDLIM1
TSR2	0.822039	1.35028	0.0313253	2685	tags=15%, list=5%, signal=15%	AAAS/SMPD4/PCBP2/SART3/ABI2/EPAS1/NUBPL/STRAP/NDUFA10/FANCI/NDUFC1/RPN1/NDUFS2
ARHGAP1	0.891572	1.35023	0.00633757	2414	tags=29%, list=4%, signal=27%	HNRNPU/ACTN4/IQGAP1/ANP32E/SART3/SMPD4/CYFIP1/MYH9/GYS1/PPM1F/FLNA/GCN1/WASF2/TRIP6/INF2/CAPZB/TARDBP/PML/RNH1/RAC1/RPA1/TNKS1BP1/RUFY1/ACTG1
KIAA0408	0.914046	1.35019	0.0431548	1986	tags=13%, list=4%, signal=13%	ACTBL2/SLC3A2/MYH10/CAPZB/BRK1/SLC2A1/PCBP2/RAC1/ACTN4/DHX9/PDLIM1
TBPL1	0.809317	1.35016	0.0426829	3502	tags=26%, list=6%, signal=25%	TARDBP/HNRNPU/CHD4/PCBP2/CAPZB/IPO4/PPM1F/ANP32E/CNOT1/ACTB/RPN1/INF2/NUBPL/RUFY1/RRP1/FANCI/PRDX1/DBN1/ATXN10/HNRNPH1/DHX9/BRK1
KIAA0100	0.830774	1.35016	0.0365297	1522	tags=14%, list=3%, signal=14%	WASF2/GCN1/PPM1F/SMPD4/DHX9/HNRNPU/HNRNPM/RPA1/FANCI/ARMC6/NCKAP1/AAAS
SPC24	0.892639	1.35012	0.0494822	1657	tags=18%, list=3%, signal=17%	FANCI/PRC1/RRP1/HNRNPA3/AAAS/GTF2I/TARDBP/BOP1/NDUFA11/ACTG1/DHX9/SLC7A11/IPO4/MYH9/GYS1
SLC52A3	0.863391	1.35008	0.0163864	2427	tags=14%, list=4%, signal=14%	CAPZB/IQGAP1/INF2/SLC2A3/PML/DSTN/SAMM50/NLN/RUFY1/RPA1/FANCI/DBN1
PSMD9	0.804567	1.35007	0.0394089	4858	tags=31%, list=9%, signal=28%	AAAS/HNRNPU/PCBP2/SART3/CHCHD3/SMPD4/HNRNPM/NSUN2/WASF2/NDUFA11/HNRNPA3/CAPZB/NDUFA10/PRDX1/SAMM50/STRAP/ABI2/DSTN/SLC3A2/ACTA2/IPO7/GCN1/PPM1F/GTF2I/OXSM/MYH9
AC000123.3	0.883708	1.35005	0.0303817	2858	tags=13%, list=5%, signal=12%	GTF2I/CNOT1/EPAS1/TLN1/SAMM50/SLC7A11/PDLIM1/IPO7/NDUFA11/CD2AP/IQGAP1
FZD7	0.871425	1.35	0.0143095	2330	tags=21%, list=4%, signal=21%	DBN1/IQGAP1/ACTB/HNRNPM/GYS1/FLNA/ANP32E/HNRNPU/NCKAP1/INF2/TARDBP/HNRNPA3/DHX9/UBASH3B/ABI2/AAAS/WASF2/SLC2A1
RANBP2	0.915277	1.34996	0.0250025	1923	tags=19%, list=3%, signal=18%	IPO7/DHX9/NCKAP1/FLNB/CYFIP1/CNOT1/RPA1/HNRNPU/CD2AP/HNRNPH1/GTF2I/TNKS1BP1/TLN1/OXSM/NLN/ABI2
DPH1	0.9026	1.34995	0.00762296	3052	tags=27%, list=6%, signal=26%	RPA1/CNOT1/GTF2I/SART3/TLN1/SMPD4/HNRNPM/INF2/NUBPL/OXSM/CD2AP/TNKS1BP1/GCN1/FLNB/BOP1/MYH10/ACTN4/RAC1/DBN1/SLC2A3/PRDX1/MYH9/ANP32E
WIZ	0.87007	1.34993	0.0371204	1790	tags=18%, list=3%, signal=17%	ACTN4/SMPD4/DHX9/SAFB2/GTF2I/AAAS/TNKS1BP1/PML/GCN1/RRP1/UBASH3B/WASF2/SAMM50/ANP32E/MYH9
MRPS27	0.827231	1.34989	0.0470588	918	tags=15%, list=2%, signal=15%	LRPPRC/NLN/DHX9/HNRNPU/SART3/GCN1/IPO7/ANP32E/RPA1/MYL6/RAC1/CHCHD3/NUBPL
ZNF316	0.853313	1.34988	0.0352673	3989	tags=20%, list=7%, signal=19%	SAFB2/GCN1/SMPD4/HNRNPU/RAC1/SART3/TARDBP/SPART/ACTB/RPA1/IPO4/RUFY1/BOP1/ACTBL2/HNRNPM/NDUFS2/UBASH3B
MRTFA	0.891772	1.34984	0.00798101	1784	tags=26%, list=3%, signal=25%	SMPD4/MYH9/ATXN10/ACTB/IQGAP1/PPM1F/ACTN4/DHX9/SART3/STRAP/HNRNPM/TNKS1BP1/SLC2A3/GYS1/FLNB/MYL6/PML/RAC1/GCN1/CAPZB/TLN1/NCKAP1
AC005064.1	0.909966	1.34983	0.0324003	983	tags=8%, list=2%, signal=8%	GCN1/SART3/PPM1F/ACTA1/FANCI/HNRNPU/DBN1
NPM1P6	0.833128	1.34978	0.0285422	2853	tags=27%, list=5%, signal=26%	WASF2/GCN1/ACTG1/STRAP/TARDBP/SLC7A11/SART3/SQSTM1/IPO7/LRPPRC/RUFY1/SAFB2/PCBP2/RPA1/SLC2A3/PPM1F/DBN1/DHX9/AAAS/FLNB/ACTA2/CNOT1/BRK1
SPATS2L	0.856373	1.34978	0.0271003	2563	tags=23%, list=5%, signal=22%	HNRNPA3/ABI2/SMPD4/ATXN10/CD2AP/SART3/TARDBP/NCKAP1/FANCI/ACTN4/HNRNPM/DHX9/ANP32E/RPA1/TLN1/GCN1/FLNB/CYFIP1/OXSM
PRIM2	0.92624	1.3497	0.00444337	1692	tags=21%, list=3%, signal=21%	FANCI/CD2AP/HNRNPM/TARDBP/ANP32E/SART3/DHX9/HNRNPU/HNRNPA3/STRAP/HNRNPH1/RPN1/PRDX1/PCBP2/NCKAP1/PRC1/CNOT1/INF2
MYH9	0.916033	1.34968	0.00428211	2082	tags=28%, list=4%, signal=27%	ACTN4/CYFIP1/CNOT1/FLNB/IPO7/ATXN10/FLNA/NCKAP1/GTF2I/WASF2/INF2/BRK1/SART3/TRIP6/PML/EPAS1/BOP1/CAPZB/TLN1/NDUFS1/DHX9/SMPD4/DSTN
TP53	0.827434	1.34965	0.0359712	2591	tags=19%, list=5%, signal=18%	RPA1/SART3/ABI2/ACTN4/TARDBP/SLC3A2/PPM1F/SMPD4/ACTA1/HNRNPM/NDUFA11/HNRNPU/TRIP6/MYH9/MRPS17/FANCI
UBQLN4	0.877692	1.34956	0.0292463	1456	tags=13%, list=3%, signal=13%	DHX9/ANP32E/ZHX2/HNRNPU/SMPD4/BOP1/HNRNPA3/PDLIM1/ATXN10/RNH1/RPA1
ARHGEF2	0.899818	1.34951	0.00980906	2492	tags=19%, list=5%, signal=18%	ABI2/HNRNPA3/DBN1/ACTG1/HNRNPM/RRP1/GCN1/HNRNPU/FLNA/DHX9/ATXN10/WASF2/STRAP/SMPD4/ANP32E/PDLIM1
EEF1A1	0.846321	1.3495	0.0322581	3295	tags=33%, list=6%, signal=31%	DHX9/IPO7/SMPD4/HNRNPM/LRPPRC/NUBPL/CNOT1/MYH9/ATXN10/BOP1/SLC3A2/ABI2/HNRNPU/SQSTM1/HNRNPA3/FLNB/CHCHD3/TARDBP/SART3/CYFIP1/TNKS1BP1/SAFB2/CAPZB/ACTN4/PCBP2/NDUFS2/GCN1/NDUFC1
SLC25A25	0.813388	1.34949	0.0434286	4626	tags=25%, list=8%, signal=23%	EPAS1/CNOT1/RAC1/SPART/PRC1/SLC7A11/ATXN10/TARDBP/HNRNPH1/BRK1/ACTG1/DHX9/SLC3A2/NDUFA10/NLN/UBASH3B/RRP1/MYH9/PML/GTF2I/DBN1
ACTN4	0.897203	1.34943	0.0103487	2569	tags=25%, list=5%, signal=24%	NCKAP1/SART3/MYH9/DHX9/RPA1/SAFB2/CNOT1/SMPD4/HNRNPM/FLNB/RNH1/TNKS1BP1/ATXN10/MYH10/HNRNPU/PDLIM1/LRPPRC/PRC1/CYFIP1/GYS1/SLC2A1
ST13P15	0.832603	1.34932	0.0443038	1555	tags=8%, list=3%, signal=8%	IPO7/DHX9/ATXN10/NDUFA11/FLNB/PPM1F/CAPZB
HTT	0.83253	1.34929	0.0409357	3151	tags=30%, list=6%, signal=28%	PPM1F/SART3/CNOT1/INF2/GCN1/NCKAP1/SAMM50/LRPPRC/HNRNPU/WASF2/SQSTM1/DHX9/MYH10/CHCHD3/SMPD4/GYS1/HNRNPH1/GTF2I/NDUFS1/NLN/PRC1/BRK1/NDUFC1/SLC3A2/RRP1
TCTN2	0.910902	1.34925	0.00388239	2851	tags=25%, list=5%, signal=24%	SMPD4/SART3/FANCI/DHX9/HNRNPA3/HNRNPU/ABI2/HNRNPH1/AAAS/BRK1/ANP32E/ACTB/PRC1/PML/PPM1F/GTF2I/RPN1/TLN1/HNRNPM/ACTBL2/NDUFA11
ZDHHC2	0.796741	1.34924	0.0394089	2193	tags=20%, list=4%, signal=19%	IQGAP1/SART3/ABI2/SLC7A11/ACTN4/HNRNPU/NCKAP1/FANCI/CHCHD3/HNRNPM/GYS1/SLC3A2/PML/NUBPL/SQSTM1/NDUFC1/ACTA2
RPL23AP53	0.761088	1.34923	0.0484076	3013	tags=21%, list=5%, signal=20%	NCKAP1/LRPPRC/ZHX2/WASF2/TLN1/UBASH3B/IPO7/ACTA2/IQGAP1/DHX9/SART3/BRK1/FLNA/ACTA1/IPO4/SLC7A11/RPA1/PRC1
AC011330.1	0.815994	1.34921	0.048	3645	tags=12%, list=7%, signal=11%	NDUFS1/ACTG2/ARMC6/CNOT1/ACTA2/GTF2I/TNKS1BP1/IPO4/MYH10/FLNB
COX6CP14	0.97957	1.34918	0.0137395	1125	tags=1%, list=2%, signal=1%	NLN
RAN	0.903289	1.34917	0.00870782	2940	tags=30%, list=5%, signal=28%	TARDBP/HNRNPA3/HNRNPM/SART3/LRPPRC/DBN1/HNRNPU/ABI2/PCBP2/BOP1/GCN1/WASF2/SLC2A3/SLC3A2/UBASH3B/PRDX1/DHX9/SLC7A11/AAAS/IQGAP1/ANP32E/NLN/RNH1/NUBPL/FANCI
AC008691.1	0.902476	1.34912	0.0139869	3067	tags=13%, list=6%, signal=12%	ABI2/SMPD4/RPA1/LRPPRC/SAMM50/NDUFA11/NDUFS2/HNRNPA3/FANCI/FLNB/IPO7
KCTD5	0.89218	1.34909	0.00526598	1910	tags=21%, list=3%, signal=21%	SART3/ACTN4/SMPD4/ANP32E/TLN1/HNRNPM/TARDBP/GTF2I/GYS1/HNRNPU/UBASH3B/AAAS/FLNB/CNOT1/TNKS1BP1/DHX9/IQGAP1/ACTB
AC092368.3	0.851586	1.34901	0.0173821	2198	tags=15%, list=4%, signal=15%	SMPD4/DHX9/MYH9/ACTC1/TNKS1BP1/NCKAP1/ATXN10/SLC2A1/GTF2I/TLN1/WASF2/RPN1/SAFB2
MTX2	0.901666	1.34898	0.00233467	2396	tags=27%, list=4%, signal=26%	HNRNPU/ATXN10/SMPD4/LRPPRC/ACTA2/NCKAP1/HNRNPA3/SAFB2/SART3/MYH9/DHX9/HNRNPM/CHCHD3/GYS1/TNKS1BP1/DSTN/ABI2/NDUFC1/IPO4/RNH1/TARDBP/ACTB/GTF2I
AC244669.1	0.786287	1.34896	0.0386941	3969	tags=23%, list=7%, signal=21%	NUBPL/TARDBP/RRP1/NCKAP1/NDUFS2/ABI2/PRDX1/DBN1/PML/BRK1/IPO4/CHCHD3/GYS1/RPA1/PDLIM1/RAC1/HNRNPA3/HNRNPM/PPM1F
CDC42	0.892821	1.34893	0.00565914	2462	tags=25%, list=4%, signal=24%	CAPZB/WASF2/TARDBP/HNRNPU/IQGAP1/PRDX1/MYH9/CD2AP/SLC2A1/PML/ACTB/TLN1/HNRNPM/BRK1/NLN/FLNA/NCKAP1/PDLIM1/ATXN10/DSTN/SQSTM1
AC092437.1	0.763804	1.34889	0.05	4261	tags=23%, list=8%, signal=21%	DBN1/SART3/ACTG1/PCBP2/FLNA/LRPPRC/MYH9/PRDX1/PML/ACTG2/CD2AP/NCKAP1/RAC1/TLN1/ARMC6/SQSTM1/NDUFC1/NLN/SAMM50
ZNF622	0.812581	1.34887	0.0492611	2074	tags=15%, list=4%, signal=15%	RRP1/RPN1/NSUN2/BRK1/AAAS/RNH1/MYL6/RUFY1/IQGAP1/MYH9/CHD4/NDUFA10/STRAP
AKAP8L	0.873232	1.34881	0.0111037	3507	tags=25%, list=6%, signal=23%	SAFB2/HNRNPH1/SMPD4/HNRNPM/AAAS/CAPZB/GYS1/HNRNPU/TNKS1BP1/TARDBP/WASF2/ACTN4/CNOT1/RPA1/RUFY1/PPM1F/INF2/HNRNPA3/GCN1/PRDX1/SQSTM1
THOC6	0.860275	1.34877	0.022678	2206	tags=24%, list=4%, signal=23%	AAAS/TARDBP/SART3/CHD4/PCBP2/RAC1/DBN1/RRP1/PRC1/ANP32E/CAPZB/RUFY1/OXSM/MRPS17/RPA1/HNRNPU/NDUFS2/ACTA2/SLC2A3/ACTN4
RALA	0.866506	1.34875	0.0163528	2068	tags=20%, list=4%, signal=20%	RAC1/SAFB2/DHX9/GCN1/HNRNPM/HNRNPU/SART3/SMPD4/CHCHD3/PCBP2/PPM1F/NDUFA10/ARMC6/TARDBP/ACTA1/PML/MRPS17
RBM39	0.914655	1.34875	0.00738709	719	tags=13%, list=1%, signal=13%	HNRNPH1/HNRNPA3/SMPD4/SART3/HNRNPU/PRC1/DHX9/CD2AP/SAFB2/RPA1/TARDBP
AC074011.1	0.845087	1.34873	0.0353741	4212	tags=25%, list=8%, signal=23%	PML/FLNA/PPM1F/SLC2A1/RAC1/IPO7/BOP1/UBASH3B/PRDX1/GYS1/SAMM50/CAPZB/TLN1/LRPPRC/ACTB/NDUFS2/DSTN/ATXN10/GTF2I/NSUN2/SLC3A2
METTL6	0.893489	1.34872	0.00706416	3729	tags=31%, list=7%, signal=29%	HNRNPU/PCBP2/SMPD4/AAAS/SART3/TARDBP/GCN1/RUFY1/NCKAP1/RPN1/FLNB/ZHX2/OXSM/MRPS17/NUBPL/ACTB/LRPPRC/PDLIM1/PML/HNRNPA3/DBN1/DHX9/ABI2/EPAS1/CAPZB/BRK1
SOX12	0.814402	1.34871	0.0368664	2344	tags=12%, list=4%, signal=11%	SMPD4/DBN1/PCBP2/RAC1/ATXN10/CD2AP/TARDBP/DHX9/HNRNPM/TRIP6
AC026412.3	0.820222	1.3487	0.0357143	2997	tags=21%, list=5%, signal=20%	NSUN2/HNRNPH1/HNRNPU/SLC7A11/MYH10/GYS1/NDUFS1/WASF2/SMPD4/IPO7/SLC2A1/ACTBL2/HNRNPM/SAMM50/CHCHD3/TARDBP/BRK1/GCN1
FBXL19-AS1	0.83372	1.34868	0.0383234	2733	tags=18%, list=5%, signal=17%	CD2AP/ABI2/ACTN4/AAAS/SMPD4/NDUFA11/NCKAP1/NDUFA10/DHX9/RUFY1/BRK1/ZHX2/TARDBP/NDUFS1/TRIP6
PSMD11	0.86763	1.34859	0.0419977	2991	tags=32%, list=5%, signal=30%	GCN1/HNRNPU/NSUN2/STRAP/TARDBP/SART3/HNRNPA3/GYS1/DHX9/SAMM50/RRP1/IPO4/CHCHD3/CAPZB/CD2AP/BRK1/OXSM/FANCI/ANP32E/ACTG2/PRDX1/ACTBL2/ACTG1/RAC1/SLC3A2/RUFY1/AAAS
HNF4G	0.819688	1.34854	0.0341981	4979	tags=30%, list=9%, signal=27%	IQGAP1/NCKAP1/FLNA/INF2/CD2AP/UBASH3B/ACTN4/NSUN2/MYH9/CYFIP1/ZHX2/CHCHD3/HNRNPA3/DHX9/LRPPRC/HNRNPM/CAPZB/DSTN/SLC2A3/SLC2A1/PRDX1/ACTB/RPN1/TNKS1BP1/GYS1
VPS13B	0.911636	1.34841	0.0097074	2871	tags=21%, list=5%, signal=20%	GTF2I/IPO7/DHX9/ZHX2/CNOT1/CYFIP1/MYH9/FLNA/NCKAP1/SQSTM1/OXSM/PRDX1/SAMM50/NUBPL/NLN/IPO4/ARMC6/PRC1
AC012254.4	0.783601	1.34836	0.039604	3007	tags=8%, list=5%, signal=8%	HNRNPH1/IQGAP1/HNRNPA3/ANP32E/MYH9/CD2AP/STRAP
ORC4	0.863222	1.34833	0.0479911	1762	tags=21%, list=3%, signal=21%	HNRNPU/LRPPRC/SMPD4/DHX9/NDUFA10/RPA1/HNRNPA3/HNRNPM/NCKAP1/ABI2/WASF2/IQGAP1/GTF2I/CNOT1/NDUFS2/TLN1/GCN1/STRAP
KIFBP	0.888938	1.34833	0.00921036	1611	tags=17%, list=3%, signal=16%	DHX9/IPO7/HNRNPU/DSTN/NSUN2/NCKAP1/GTF2I/CD2AP/FLNA/ACTN4/NDUFS2/CYFIP1/ACTB/ACTA2
AC004980.1	0.866023	1.34832	0.0115283	1186	tags=17%, list=2%, signal=16%	SMPD4/GYS1/SAFB2/HNRNPM/ABI2/HNRNPH1/AAAS/NDUFC1/STRAP/SLC3A2/SART3/HNRNPA3/FANCI/SLC7A11
DDN-AS1	0.872722	1.3482	0.0435897	3462	tags=18%, list=6%, signal=17%	HNRNPH1/SART3/ZHX2/DBN1/HNRNPM/ANP32E/INF2/CYFIP1/SMPD4/PPM1F/GCN1/IQGAP1/CD2AP/NSUN2/SLC2A3
FANCL	0.89801	1.3482	0.00611411	1278	tags=15%, list=2%, signal=15%	HNRNPA3/SMPD4/HNRNPH1/DHX9/ANP32E/GTF2I/ABI2/NCKAP1/PRC1/SART3/RPA1/IPO7/STRAP
AL513523.1	0.852834	1.34813	0.0379885	2175	tags=14%, list=4%, signal=14%	HNRNPA3/SMPD4/DHX9/FANCI/NLN/NSUN2/RPN1/TLN1/CYFIP1/MYH9/ANP32E/SART3
LCLAT1	0.818535	1.3481	0.0357753	3358	tags=27%, list=6%, signal=26%	GCN1/LRPPRC/RPA1/NCKAP1/CHCHD3/MYH10/PML/SART3/HNRNPA3/ABI2/TNKS1BP1/GTF2I/NLN/SLC2A1/TARDBP/CD2AP/RRP1/PCBP2/SPART/UBASH3B/SLC7A11/SAFB2/HNRNPH1
LRPPRC	0.885871	1.34808	0.0129116	3129	tags=33%, list=6%, signal=31%	IPO7/DHX9/HNRNPU/GCN1/SMPD4/NCKAP1/CNOT1/FLNB/CD2AP/ATXN10/SAMM50/PRC1/CYFIP1/NDUFA11/STRAP/CHCHD3/PDLIM1/MYH10/HNRNPM/EPAS1/PRDX1/NDUFA10/GTF2I/NDUFS1/RUFY1/SLC7A11/PML
DENND5A	0.927188	1.34804	0.00124322	2399	tags=25%, list=4%, signal=24%	NCKAP1/DHX9/WASF2/IPO7/SART3/TLN1/GTF2I/CYFIP1/IQGAP1/GCN1/ACTN4/EPAS1/FLNA/LRPPRC/HNRNPA3/NSUN2/SMPD4/HNRNPM/RPN1/ACTG2/BOP1
AC007956.2	0.796714	1.34798	0.0381679	2393	tags=13%, list=4%, signal=13%	ABI2/RPA1/ANP32E/CNOT1/GYS1/IQGAP1/PRC1/SART3/EPAS1/DBN1/CYFIP1
SLC37A1	0.867192	1.34798	0.0283894	2635	tags=20%, list=5%, signal=19%	INF2/CD2AP/FLNA/PML/DSTN/NDUFS2/DHX9/SLC2A1/RNH1/HNRNPM/NSUN2/GTF2I/SQSTM1/SAFB2/RRP1/SLC2A3/MYH9
PMM1	0.773687	1.34795	0.03875	1122	tags=11%, list=2%, signal=11%	SAMM50/ATXN10/TARDBP/HNRNPM/CHD4/FLNB/PCBP2/BRK1/STRAP
ACAP3	0.817402	1.3479	0.0377358	2439	tags=17%, list=4%, signal=16%	GCN1/SART3/AAAS/CAPZB/SAFB2/TNKS1BP1/NDUFA11/PPM1F/NLN/NCKAP1/TARDBP/ACTG1/MRPS17/SQSTM1
RAD51	0.936129	1.34788	0.0314607	1584	tags=20%, list=3%, signal=20%	FANCI/HNRNPA3/SART3/PRC1/AAAS/HNRNPM/TARDBP/CAPZB/MYL6/CHCHD3/ACTG1/RAC1/BRK1/SLC3A2/RNH1/CYFIP1/ACTB
EPOR	0.802875	1.34787	0.0414634	2165	tags=11%, list=4%, signal=10%	SART3/ABI2/SAFB2/GYS1/WASF2/UBASH3B/INF2/PRC1/PRDX1
UPF3B	0.86175	1.34779	0.0180006	2138	tags=19%, list=4%, signal=18%	HNRNPA3/FANCI/DHX9/TARDBP/SMPD4/ANP32E/RPA1/GYS1/HNRNPU/CAPZB/IPO4/PPM1F/CHD4/RPN1/ACTBL2/ACTN4
KLF11	0.89796	1.34777	0.0142135	438	tags=8%, list=1%, signal=8%	GTF2I/CNOT1/NDUFS1/FLNB/EPAS1/DHX9/CHD4
AC108727.1	0.901	1.34776	0.0187268	2657	tags=10%, list=5%, signal=9%	SAFB2/IQGAP1/ACTG2/SPART/SAMM50/PCBP2/FLNB/OXSM
GMPS	0.918291	1.34774	0.0206422	1674	tags=18%, list=3%, signal=17%	DHX9/HNRNPU/HNRNPM/HNRNPA3/SMPD4/ABI2/GCN1/NCKAP1/FANCI/HNRNPH1/STRAP/NDUFS2/RPA1/RRP1/PCBP2
NCK1-DT	0.815364	1.34771	0.0321046	1617	tags=12%, list=3%, signal=12%	WASF2/TARDBP/CAPZB/HNRNPA3/SMPD4/HNRNPU/IPO7/PRDX1/ARMC6/NDUFA10
MIR4664	0.904947	1.3477	0.00812711	909	tags=14%, list=2%, signal=14%	GTF2I/MYH9/ACTN4/CYFIP1/FLNB/MYL6/CNOT1/NCKAP1/DHX9/SQSTM1/PCBP2/SLC3A2
G3BP1	0.871129	1.34766	0.0155666	3420	tags=30%, list=6%, signal=28%	IPO7/CNOT1/ZHX2/SQSTM1/RUFY1/NSUN2/DHX9/NDUFS1/GTF2I/WASF2/NCKAP1/LRPPRC/SLC3A2/NDUFA10/NUBPL/SART3/PML/TLN1/CYFIP1/RRP1/TARDBP/MRPS17/GCN1/HNRNPM/ACTG1
EIF3H	0.87322	1.34763	0.0468384	3122	tags=18%, list=6%, signal=17%	BOP1/ZHX2/NCKAP1/PPM1F/UBASH3B/MYH9/HNRNPU/MRPS17/SQSTM1/ACTG1/PRDX1/CD2AP/CYFIP1/RAC1/RPN1
CEP72	0.837251	1.34761	0.00783762	4529	tags=27%, list=8%, signal=25%	RUFY1/HNRNPU/NSUN2/HNRNPH1/INF2/NUBPL/AAAS/SMPD4/EPAS1/ABI2/ACTA1/DHX9/PRC1/GCN1/NDUFS1/FLNB/DBN1/MYH9/SPART/NDUFC1/NDUFA11/HNRNPA3/STRAP
CDV3	0.866971	1.34756	0.0145452	3638	tags=31%, list=7%, signal=29%	SMPD4/CYFIP1/IQGAP1/HNRNPH1/IPO7/SART3/LRPPRC/EPAS1/WASF2/RPA1/HNRNPA3/GCN1/ACTA2/NDUFA10/CD2AP/RAC1/STRAP/HNRNPU/FLNB/OXSM/DHX9/NDUFS1/NCKAP1/ZHX2/BOP1/NUBPL
EIF2D	0.838526	1.3475	0.0414129	2580	tags=21%, list=5%, signal=20%	HNRNPU/RUFY1/LRPPRC/ATXN10/AAAS/DHX9/HNRNPM/ACTB/SLC7A11/NDUFS2/WASF2/RPA1/GTF2I/PCBP2/CNOT1/RPN1/CAPZB/TLN1
MPRIPP1	0.866795	1.34747	0.0146656	4107	tags=29%, list=7%, signal=26%	HNRNPU/SAFB2/DHX9/HNRNPM/IPO4/HNRNPH1/ACTA2/SQSTM1/GCN1/INF2/ABI2/NDUFA11/NDUFS1/NCKAP1/CHCHD3/PPM1F/ZHX2/NDUFA10/TRIP6/NDUFC1/MYH10/CYFIP1/PRDX1/PDLIM1
PHTF1	0.825114	1.34732	0.0168911	6214	tags=39%, list=11%, signal=35%	IQGAP1/ABI2/SART3/CHCHD3/HNRNPM/WASF2/CYFIP1/UBASH3B/ANP32E/SLC2A1/MYH9/CNOT1/FANCI/NDUFC1/MYL6/GTF2I/RPN1/SPART/PPM1F/STRAP/SAFB2/DSTN/DBN1/RUFY1/SLC7A11/SMPD4/ACTA1/RNH1/SLC2A3/TRIP6/IPO7/PCBP2/INF2
TFAM	0.902254	1.3473	0.00937126	1571	tags=19%, list=3%, signal=19%	IPO7/NCKAP1/DHX9/SART3/RPA1/CNOT1/HNRNPU/MYH10/LRPPRC/HNRNPH1/TARDBP/SMPD4/STRAP/RRP1/CYFIP1/NDUFS1
TNPO2	0.889814	1.34729	0.00502052	2900	tags=20%, list=5%, signal=19%	SAFB2/SMPD4/GYS1/SART3/HNRNPA3/CHCHD3/ANP32E/DBN1/HNRNPH1/ABI2/FLNA/NLN/ACTN4/IPO4/PRDX1/MRPS17/RPA1
SALL2	0.902379	1.34724	0.00475401	1870	tags=14%, list=3%, signal=14%	ABI2/HNRNPU/HNRNPH1/MYH10/RPA1/HNRNPA3/TARDBP/DBN1/GTF2I/CAPZB/RNH1/FLNB
EGLN1	0.879016	1.34721	0.0251735	1664	tags=17%, list=3%, signal=16%	CNOT1/GTF2I/MYH9/IPO7/NSUN2/TLN1/NDUFS2/SMPD4/NDUFA11/DHX9/ANP32E/IQGAP1/TRIP6/TNKS1BP1
PRDX2P1	0.829032	1.34715	0.0496689	2018	tags=5%, list=4%, signal=5%	OXSM/CD2AP/INF2/SQSTM1
CNPPD1	0.816394	1.34715	0.0354286	2694	tags=26%, list=5%, signal=25%	NDUFA10/RRP1/PDLIM1/CAPZB/RAC1/SMPD4/SAMM50/BRK1/MYL6/HNRNPU/GCN1/PCBP2/PML/SLC3A2/TRIP6/RPA1/NLN/WASF2/ACTBL2/STRAP/ZHX2/MYH10
EPS15L1	0.86325	1.34712	0.0171196	2588	tags=23%, list=5%, signal=22%	SMPD4/SAFB2/DHX9/RPA1/ACTN4/SART3/HNRNPU/ANP32E/FLNA/INF2/NCKAP1/MYH9/GCN1/PRC1/CYFIP1/RPN1/RAC1/PRDX1/FANCI
AP001269.1	0.798876	1.34708	0.0446043	2753	tags=14%, list=5%, signal=14%	IPO4/AAAS/TARDBP/DHX9/BOP1/EPAS1/NDUFS1/TLN1/CNOT1/RRP1/FANCI/INF2
RBBP7	0.891157	1.34705	0.00524143	1941	tags=18%, list=4%, signal=17%	FANCI/DHX9/SART3/HNRNPU/RPA1/HNRNPA3/CHCHD3/HNRNPM/ABI2/STRAP/DSTN/RAC1/HNRNPH1/PML/CAPZB
MBLAC1	0.803341	1.34703	0.0474453	3136	tags=15%, list=6%, signal=15%	NDUFA11/MYL6/RRP1/CYFIP1/BRK1/CNOT1/TLN1/HNRNPH1/GCN1/IPO4/ACTN4/PRDX1/HNRNPA3
AP005900.1	0.867998	1.34703	0.0311748	2100	tags=18%, list=4%, signal=17%	SAFB2/DBN1/CHCHD3/PRDX1/GTF2I/NDUFS1/HNRNPH1/DSTN/NDUFS2/GCN1/CHD4/ACTG1/FLNB/ACTB/NUBPL
CDK5	0.831258	1.34701	0.0242157	1543	tags=8%, list=3%, signal=8%	RNH1/CHCHD3/PRDX1/BRK1/NDUFS2/NDUFC1/SAFB2
CP	0.841261	1.34701	0.0275457	3314	tags=14%, list=6%, signal=13%	SMPD4/AAAS/NDUFA10/NDUFA11/DBN1/NDUFS1/FLNB/SLC7A11/MYL6/RPN1/PCBP2/NLN
MITD1	0.886448	1.347	0.0122377	1920	tags=19%, list=3%, signal=18%	HNRNPA3/UBASH3B/SMPD4/ANP32E/PCBP2/SART3/TARDBP/HNRNPU/FANCI/ABI2/GYS1/ACTA1/SAFB2/RAC1/NCKAP1/ACTG1
KNSTRN	0.872637	1.34697	0.0409357	1011	tags=13%, list=2%, signal=13%	FANCI/DHX9/PRC1/SMPD4/HNRNPU/CAPZB/AAAS/NSUN2/PRDX1/NUBPL/TRIP6
MCCD1P1	0.819846	1.34688	0.0293731	2489	tags=14%, list=5%, signal=14%	ACTN4/CD2AP/NLN/PRDX1/IPO4/PPM1F/NDUFS1/ACTA2/ACTG1/EPAS1/MRPS17/HNRNPM
EXO5	0.878666	1.34688	0.0140047	2871	tags=24%, list=5%, signal=23%	HNRNPA3/AAAS/ANP32E/IPO7/NSUN2/HNRNPH1/PRC1/FANCI/RPN1/DHX9/SART3/PRDX1/HNRNPM/TARDBP/NDUFC1/WASF2/GYS1/INF2/LRPPRC/SLC2A3
AL080312.2	0.835443	1.34688	0.0369822	4237	tags=15%, list=8%, signal=14%	ACTB/NDUFA11/TARDBP/NDUFS1/RPA1/NUBPL/TRIP6/SLC7A11/RNH1/RPN1/ACTG2/MYL6/NLN
AC026956.2	0.920426	1.3468	0.0181799	940	tags=5%, list=2%, signal=5%	SLC2A1/MYH9/CHCHD3/EPAS1
USP19	0.887948	1.34672	0.0279829	2917	tags=29%, list=5%, signal=27%	DHX9/SMPD4/SART3/HNRNPU/CNOT1/GCN1/RPA1/TLN1/FLNB/ANP32E/HNRNPA3/STRAP/ACTN4/GTF2I/MYH9/NDUFS2/SAFB2/CHD4/HNRNPM/LRPPRC/PRDX1/MYH10/OXSM/RNH1
TRAP1	0.875693	1.34668	0.02262	2102	tags=25%, list=4%, signal=24%	CYFIP1/CNOT1/LRPPRC/GTF2I/SMPD4/NDUFA10/NLN/ACTG1/SQSTM1/NDUFS2/MYH9/SLC3A2/IPO7/PRDX1/DSTN/MYH10/CHCHD3/DHX9/GYS1/PCBP2/IPO4
ZNF300	0.83291	1.34664	0.0170048	2762	tags=13%, list=5%, signal=12%	HNRNPA3/SART3/HNRNPH1/HNRNPU/FANCI/ABI2/AAAS/PRC1/PPM1F/GCN1/FLNB
VAPA	0.795781	1.34663	0.0447585	2496	tags=25%, list=5%, signal=24%	NCKAP1/ATXN10/DHX9/RPA1/LRPPRC/RUFY1/SQSTM1/EPAS1/IPO4/NDUFS2/HNRNPM/CYFIP1/RNH1/NDUFC1/HNRNPU/ANP32E/IPO7/ACTG1/NUBPL/NLN/CD2AP
COL18A1	0.868978	1.34656	0.0133939	1264	tags=13%, list=2%, signal=13%	MYH9/CNOT1/SMPD4/CHD4/GTF2I/SLC2A1/TARDBP/TNKS1BP1/ARMC6/RPN1/FLNB
RPS23P6	0.840822	1.34656	0.0448667	3345	tags=17%, list=6%, signal=16%	NDUFA11/GTF2I/CHD4/MYH10/CNOT1/PPM1F/ZHX2/FLNB/ATXN10/TARDBP/SAMM50/NDUFS2/TNKS1BP1/NUBPL
PHOSPHO2	0.793589	1.34651	0.0426829	3024	tags=23%, list=5%, signal=21%	HNRNPA3/SMPD4/NDUFA10/HNRNPM/DHX9/BRK1/ANP32E/MYL6/PPM1F/PRDX1/NUBPL/TARDBP/FANCI/HNRNPU/NDUFS2/ACTG1/ACTA2/NCKAP1/ATXN10
RAB11FIP4	0.801886	1.3465	0.0295159	4433	tags=23%, list=8%, signal=21%	HNRNPU/SMPD4/DHX9/FANCI/MYH9/RPA1/GCN1/GTF2I/RPN1/NDUFS2/SART3/PRC1/RUFY1/NDUFS1/NDUFA11/EPAS1/RRP1/IPO4/PPM1F
MAP1LC3B2	0.773143	1.34647	0.047619	2523	tags=15%, list=5%, signal=15%	SLC2A1/SLC7A11/RAC1/DSTN/NDUFC1/SLC2A3/RNH1/ACTG1/ACTBL2/CAPZB/BOP1/GYS1/RPN1
NBEAL1	0.908205	1.34646	0.0225865	1788	tags=14%, list=3%, signal=14%	NCKAP1/CNOT1/GTF2I/NDUFS1/CYFIP1/EPAS1/NDUFA10/IPO7/LRPPRC/CD2AP/DSTN/NDUFA11
PRKCD	0.857697	1.34645	0.0159243	3956	tags=23%, list=7%, signal=21%	SMPD4/ABI2/SART3/DBN1/PCBP2/HNRNPA3/AAAS/INF2/RUFY1/FANCI/PPM1F/RRP1/NCKAP1/ACTG1/GYS1/ZHX2/ACTA2/ACTB/RAC1
ZNF446	0.831441	1.34644	0.0341578	2933	tags=21%, list=5%, signal=20%	SAFB2/GCN1/HNRNPM/HNRNPU/GYS1/DHX9/IQGAP1/SMPD4/TARDBP/CD2AP/ABI2/IPO4/PML/TRIP6/WASF2/SLC2A1/SLC2A3/RPN1
RNF10	0.828449	1.34642	0.0331808	3344	tags=23%, list=6%, signal=21%	GCN1/SART3/ACTN4/TARDBP/RUFY1/HNRNPU/FANCI/STRAP/SMPD4/WASF2/OXSM/RPN1/DHX9/ANP32E/CNOT1/SLC7A11/PCBP2/RNH1/AAAS
SLC25A3	0.788105	1.34637	0.0450563	3146	tags=20%, list=6%, signal=19%	GCN1/MYL6/CHCHD3/STRAP/NDUFA10/HNRNPM/OXSM/DBN1/NDUFS2/TRIP6/FANCI/SAMM50/DSTN/PPM1F/INF2/UBASH3B/TARDBP
ZNF619P1	0.999582	1.34633	0.0432314	24	tags=1%, list=0%, signal=1%	ABI2
BET1L	0.828535	1.34631	0.0366972	4495	tags=26%, list=8%, signal=24%	SAFB2/RNH1/SMPD4/AAAS/PPM1F/HNRNPU/RPA1/RUFY1/RAC1/EPAS1/PCBP2/GCN1/NDUFA11/WASF2/TNKS1BP1/ARMC6/ABI2/GYS1/STRAP/NDUFA10/FANCI/INF2
KHDRBS3	0.743542	1.3463	0.0458839	3487	tags=15%, list=6%, signal=15%	ZHX2/CHCHD3/SQSTM1/BOP1/ACTB/TARDBP/PCBP2/ACTN4/RPN1/WASF2/RAC1/DSTN/IPO4
AP3M1	0.901628	1.34628	0.0206975	1185	tags=13%, list=2%, signal=13%	GTF2I/DHX9/NCKAP1/RPA1/IPO7/GCN1/TLN1/SMPD4/LRPPRC/SART3/STRAP
AC022007.1	0.871338	1.34626	0.0256391	1817	tags=10%, list=3%, signal=9%	FANCI/SMPD4/HNRNPU/EPAS1/BRK1/RPA1/PCBP2/NDUFA11
TXLNG	0.930387	1.34626	0.00127251	956	tags=17%, list=2%, signal=16%	IPO7/DHX9/CNOT1/GTF2I/HNRNPU/LRPPRC/RPA1/MYH9/NSUN2/SART3/NCKAP1/NUBPL/AAAS/RPN1
NAIF1	0.823351	1.34624	0.0239265	3992	tags=23%, list=7%, signal=21%	AAAS/RNH1/RPA1/HNRNPU/NLN/SAFB2/GTF2I/NDUFA10/WASF2/MYL6/HNRNPH1/ARMC6/OXSM/SMPD4/NDUFC1/PPM1F/PRC1/ZHX2/ACTA1
IGFALS	0.788276	1.34615	0.0330073	5298	tags=26%, list=10%, signal=24%	SLC7A11/BOP1/RNH1/ZHX2/SLC2A1/NDUFA10/NLN/PRC1/TNKS1BP1/WASF2/IPO7/RPA1/ARMC6/HNRNPH1/DBN1/LRPPRC/RRP1/HNRNPA3/NDUFC1/HNRNPM/IQGAP1/NDUFS1
LUC7L2	0.845481	1.34612	0.0418558	3577	tags=26%, list=6%, signal=25%	SART3/ABI2/SAFB2/HNRNPH1/SMPD4/ACTB/AAAS/TARDBP/PCBP2/PRC1/BRK1/PDLIM1/FANCI/ANP32E/ZHX2/RAC1/SLC2A3/HNRNPU/RUFY1/STRAP/SLC7A11/ACTG2
BHLHE40	0.7994	1.34611	0.0437788	3337	tags=18%, list=6%, signal=17%	SLC2A3/IQGAP1/EPAS1/MYH9/GTF2I/CNOT1/CHD4/PCBP2/ATXN10/FLNB/RUFY1/IPO4/UBASH3B/RNH1/SLC3A2
CCNB3	0.770798	1.3461	0.0414508	2209	tags=10%, list=4%, signal=9%	LRPPRC/IPO7/DHX9/FLNB/ZHX2/AAAS/ACTA1/GYS1
AC009927.1	0.872376	1.34607	0.0332447	647	tags=5%, list=1%, signal=5%	PRC1/FLNB/GTF2I/SAFB2
EXOSC4	0.901515	1.34602	0.0332594	1864	tags=12%, list=3%, signal=12%	BOP1/SLC3A2/CHD4/FLNB/ZHX2/EPAS1/NDUFA11/NDUFA10/DHX9/LRPPRC
YAE1	0.866661	1.346	0.00934019	2674	tags=25%, list=5%, signal=24%	HNRNPU/AAAS/TARDBP/HNRNPM/SAFB2/HNRNPA3/GYS1/ANP32E/ACTG1/SMPD4/SART3/CHD4/DHX9/MRPS17/SPART/FANCI/EPAS1/OXSM/NDUFC1/IQGAP1/HNRNPH1
JADE3	0.894679	1.34591	0.010315	2514	tags=24%, list=5%, signal=23%	NCKAP1/IPO7/GTF2I/DHX9/LRPPRC/CNOT1/RPA1/PRC1/TLN1/HNRNPA3/CYFIP1/HNRNPU/NDUFC1/CHD4/MYH9/ATXN10/PDLIM1/CHCHD3/FANCI/PCBP2
NAA50	0.893024	1.3459	0.0174244	2672	tags=30%, list=5%, signal=28%	LRPPRC/HNRNPU/GCN1/NCKAP1/FANCI/CYFIP1/DHX9/HNRNPA3/CD2AP/WASF2/RPA1/SLC2A1/SMPD4/TLN1/CNOT1/HNRNPM/DBN1/SART3/SLC3A2/STRAP/NDUFA10/NDUFS1/RPN1/IPO7/ACTG1
BTBD9	0.845451	1.34586	0.0322953	2023	tags=17%, list=4%, signal=16%	WASF2/CD2AP/RAC1/GTF2I/SMPD4/SAFB2/MYH9/DHX9/ACTN4/RPA1/ZHX2/CNOT1/PPM1F/RRP1
NOP58	0.912899	1.34583	0.00346957	1757	tags=26%, list=3%, signal=25%	LRPPRC/SMPD4/DHX9/HNRNPA3/HNRNPU/MYH9/TARDBP/HNRNPH1/RPA1/NCKAP1/IPO7/NSUN2/CHD4/NLN/TLN1/OXSM/CHCHD3/PRC1/RRP1/SART3/NUBPL/SQSTM1
PTBP2	0.871476	1.34583	0.0182503	2060	tags=21%, list=4%, signal=21%	HNRNPU/SART3/ABI2/HNRNPH1/DHX9/TARDBP/SMPD4/CD2AP/NCKAP1/RPA1/PCBP2/DBN1/WASF2/ACTA1/CHD4/EPAS1/GTF2I/UBASH3B
GPKOW	0.84626	1.34582	0.0375587	1487	tags=15%, list=3%, signal=15%	HNRNPM/DHX9/RNH1/NDUFS2/GYS1/HNRNPU/FANCI/CAPZB/HNRNPA3/RUFY1/RPA1/RRP1/AAAS
RCE1	0.867643	1.34581	0.0186113	3111	tags=21%, list=6%, signal=20%	HNRNPA3/HNRNPU/SART3/SAFB2/ABI2/GCN1/HNRNPM/DHX9/WASF2/ACTG1/TRIP6/EPAS1/DBN1/GYS1/FANCI/DSTN/ATXN10/NDUFS2
TRIM25	0.798176	1.34573	0.0426309	991	tags=11%, list=2%, signal=11%	WASF2/GCN1/PRC1/SAMM50/UBASH3B/SLC7A11/SLC2A1/DBN1/ACTG1
TM7SF2	0.81373	1.34569	0.037931	3354	tags=15%, list=6%, signal=15%	IQGAP1/UBASH3B/SLC2A1/CD2AP/CHCHD3/TNKS1BP1/CYFIP1/MRPS17/RNH1/ZHX2/ABI2/SLC7A11/SAFB2
LINC01831	0.767449	1.34558	0.0406291	5047	tags=19%, list=9%, signal=17%	SLC3A2/CNOT1/TARDBP/TLN1/SAMM50/FLNA/OXSM/NDUFS2/SQSTM1/PCBP2/PRDX1/IQGAP1/ACTC1/PDLIM1/GTF2I/NDUFC1
AC006504.7	0.80105	1.34555	0.034565	3498	tags=18%, list=6%, signal=17%	SAFB2/TARDBP/PCBP2/HNRNPA3/GYS1/HNRNPU/AAAS/PRDX1/RPA1/RRP1/MYH9/NCKAP1/NDUFA10/CNOT1/ANP32E
AC087481.1	0.86342	1.34551	0.0363128	2544	tags=12%, list=5%, signal=11%	ACTBL2/GTF2I/DBN1/IQGAP1/NDUFA11/FLNA/RPN1/BOP1/PPM1F/ACTB
DBF4	0.912267	1.3455	0.011401	842	tags=14%, list=2%, signal=14%	FANCI/GCN1/STRAP/HNRNPA3/HNRNPU/SMPD4/SART3/ABI2/HNRNPM/SLC2A1/GTF2I/NCKAP1
LEPROTL1	0.839661	1.34547	0.049711	2459	tags=14%, list=4%, signal=14%	UBASH3B/IQGAP1/IPO7/STRAP/ACTG1/HNRNPM/ACTBL2/OXSM/CHCHD3/TARDBP/MYH10/NUBPL
CHST10	0.838745	1.34545	0.0233873	2594	tags=17%, list=5%, signal=16%	DBN1/ABI2/DHX9/HNRNPM/RPA1/SAFB2/PRC1/ACTG1/RPN1/SMPD4/BOP1/ACTC1/SPART/SQSTM1
ATXN2	0.876285	1.34538	0.0126914	3110	tags=26%, list=6%, signal=25%	HNRNPU/NCKAP1/SART3/GCN1/HNRNPA3/DHX9/IPO7/HNRNPM/SMPD4/BOP1/ABI2/CD2AP/LRPPRC/TARDBP/NDUFS1/NUBPL/MRPS17/GTF2I/NDUFA11/CHD4/SQSTM1/SLC2A1
CAV1	0.832797	1.34537	0.0262314	2222	tags=17%, list=4%, signal=16%	FLNA/IQGAP1/MYH9/ACTA2/UBASH3B/FANCI/RAC1/ACTG2/ACTC1/SPART/IPO7/ZHX2/GYS1/CYFIP1
AP000529.1	0.963456	1.34531	0.0246589	1649	tags=8%, list=3%, signal=8%	CD2AP/NDUFC1/PRC1/GYS1/ATXN10/MYH9/CHD4
SREBF2	0.832809	1.34531	0.0395809	2842	tags=20%, list=5%, signal=19%	SMPD4/ATXN10/FLNB/MYH9/GCN1/CD2AP/DHX9/CYFIP1/AAAS/ZHX2/SLC2A1/RUFY1/NDUFA10/NDUFA11/CNOT1/IPO4/HNRNPH1
COX6C	0.861699	1.3453	0.0284464	2040	tags=12%, list=4%, signal=11%	BOP1/GTF2I/FANCI/NDUFS1/CNOT1/DHX9/ANP32E/NDUFA11/MRPS17/NDUFS2
DNM1L	0.904069	1.34525	0.00625684	2043	tags=20%, list=4%, signal=20%	STRAP/SART3/DHX9/SMPD4/NCKAP1/HNRNPA3/CD2AP/HNRNPU/GCN1/ABI2/FANCI/HNRNPM/RPN1/TLN1/ACTN4/SPART/CYFIP1
RPL13P5	0.853558	1.34524	0.0234062	1888	tags=15%, list=3%, signal=15%	FANCI/SMPD4/WASF2/GCN1/NCKAP1/STRAP/SART3/RPA1/DHX9/LRPPRC/NLN/SQSTM1/RUFY1
ERCC2	0.819828	1.34522	0.03875	3597	tags=20%, list=7%, signal=19%	RRP1/SMPD4/MYL6/BRK1/PPM1F/SAMM50/NLN/ATXN10/GYS1/NDUFA11/WASF2/SQSTM1/OXSM/UBASH3B/TARDBP/ACTA1/ACTN4
SLC7A9	0.827402	1.3451	0.0338191	2641	tags=15%, list=5%, signal=15%	DBN1/DHX9/NSUN2/NDUFS2/ACTN4/NDUFS1/CNOT1/LRPPRC/CYFIP1/ACTBL2/SLC7A11/SQSTM1/DSTN
DSC2	0.812703	1.34507	0.0353228	3258	tags=30%, list=6%, signal=28%	LRPPRC/DHX9/GCN1/FLNB/HNRNPM/HNRNPH1/BOP1/CYFIP1/ZHX2/IPO7/DBN1/CAPZB/ACTG1/RAC1/SLC2A3/NSUN2/INF2/NCKAP1/RPA1/NLN/NDUFA10/SART3/CHD4/CHCHD3/SMPD4
AL445305.1	0.816932	1.34505	0.0339806	2790	tags=14%, list=5%, signal=14%	GTF2I/DHX9/IPO7/CNOT1/IQGAP1/NSUN2/ZHX2/LRPPRC/ACTN4/PRDX1/NLN/OXSM
ZNF513	0.865613	1.345	0.0294785	1985	tags=14%, list=4%, signal=14%	SMPD4/SART3/RUFY1/ACTN4/CNOT1/HNRNPU/DHX9/PCBP2/RAC1/NCKAP1/NDUFA11/ARMC6
CCDC92	0.810884	1.34499	0.0397112	3441	tags=21%, list=6%, signal=20%	ACTN4/SART3/SAFB2/HNRNPU/AAAS/SMPD4/RPA1/RPN1/MYH9/RNH1/PDLIM1/ACTG1/CAPZB/BRK1/UBASH3B/FLNB/HNRNPH1/LRPPRC
PALLD	0.795505	1.34497	0.0365408	3403	tags=21%, list=6%, signal=20%	SQSTM1/SLC7A11/IQGAP1/DSTN/GYS1/TLN1/NCKAP1/PPM1F/ACTB/PRDX1/MYH9/SAMM50/AAAS/UBASH3B/ACTA2/ZHX2/PML/ATXN10
TBC1D2B	0.842743	1.34496	0.0314438	3106	tags=15%, list=6%, signal=15%	EPAS1/GTF2I/MYH9/CYFIP1/CNOT1/MYL6/HNRNPH1/BOP1/NDUFA11/ACTN4/FLNB/IQGAP1/PDLIM1
ORC2	0.899917	1.34493	0.0171966	1702	tags=17%, list=3%, signal=16%	HNRNPH1/DHX9/SART3/HNRNPU/HNRNPA3/SMPD4/NCKAP1/RPA1/LRPPRC/SAFB2/GYS1/NDUFS1/TARDBP/BRK1
POMT2	0.813358	1.34492	0.028351	3616	tags=26%, list=7%, signal=25%	SMPD4/HNRNPA3/SAFB2/FLNA/BRK1/TARDBP/ATXN10/RAC1/INF2/MYH9/SAMM50/ARMC6/CHD4/CAPZB/ACTB/NUBPL/NDUFC1/ZHX2/RNH1/DBN1/SQSTM1/PRC1
C11orf68	0.825043	1.34489	0.0346021	3543	tags=19%, list=6%, signal=18%	BRK1/AAAS/RNH1/SAFB2/TRIP6/ACTG1/RPA1/ACTN4/ANP32E/CNOT1/CD2AP/FLNB/HNRNPA3/TNKS1BP1/HNRNPM/PDLIM1
AC135050.1	0.790363	1.34484	0.0465995	4328	tags=24%, list=8%, signal=22%	GYS1/MRPS17/CHCHD3/PRC1/MYH10/SLC2A1/ANP32E/HNRNPH1/SPART/SLC2A3/DBN1/PRDX1/MYL6/RRP1/NDUFC1/GCN1/NLN/UBASH3B/SLC3A2/LRPPRC
DEPDC4	0.819303	1.34481	0.0384615	4535	tags=29%, list=8%, signal=26%	AAAS/HNRNPH1/SART3/HNRNPA3/DHX9/RPA1/HNRNPU/SLC3A2/RRP1/FLNB/PCBP2/GCN1/OXSM/NDUFC1/SQSTM1/NLN/FANCI/NUBPL/ABI2/TLN1/ACTA2/FLNA/PDLIM1/INF2
ZCCHC17	0.875984	1.3447	0.0302013	3878	tags=30%, list=7%, signal=28%	TARDBP/CAPZB/PRDX1/BRK1/ANP32E/WASF2/CHD4/GYS1/RPA1/TLN1/RAC1/RUFY1/RNH1/PML/DBN1/NDUFC1/CNOT1/DSTN/TNKS1BP1/FANCI/ARMC6/RRP1/ACTA2/AAAS/SQSTM1
GPRC5B	0.828158	1.34465	0.0280584	2970	tags=15%, list=5%, signal=15%	IQGAP1/FLNA/HNRNPU/TNKS1BP1/MYH9/ACTN4/ABI2/DBN1/HNRNPM/ACTG1/FLNB/PRDX1/OXSM
IMMT	0.864868	1.34454	0.0146392	2397	tags=27%, list=4%, signal=26%	HNRNPM/LRPPRC/CHCHD3/NDUFS1/NDUFA10/NCKAP1/OXSM/SART3/HNRNPU/FANCI/STRAP/TNKS1BP1/FLNA/CYFIP1/SPART/RPA1/DHX9/BRK1/NDUFS2/PML/SLC3A2/MYH10/SAFB2
ONECUT1	0.846513	1.34452	0.0330296	3182	tags=21%, list=6%, signal=20%	CYFIP1/SLC7A11/CNOT1/NDUFS2/ACTN4/EPAS1/FLNB/HNRNPU/PML/HNRNPA3/HNRNPH1/PRDX1/SLC3A2/BRK1/NUBPL/AAAS/GCN1/BOP1
LINC00517	0.901804	1.3445	0.036547	1811	tags=10%, list=3%, signal=9%	NDUFA10/NCKAP1/PRDX1/CYFIP1/IQGAP1/EPAS1/PPM1F/DSTN
PROSER1	0.899373	1.34445	0.00695107	2582	tags=19%, list=5%, signal=18%	HNRNPA3/HNRNPU/HNRNPH1/SART3/ANP32E/GYS1/IQGAP1/TLN1/SAFB2/TARDBP/ABI2/GTF2I/GCN1/DHX9/SLC2A3/CNOT1
AL078605.1	0.906563	1.34441	0.0262155	4052	tags=14%, list=7%, signal=13%	CHD4/SLC3A2/INF2/OXSM/NDUFA11/ACTB/SLC2A3/BRK1/NDUFC1/NLN/TLN1/STRAP
EDNRB	0.850622	1.3444	0.0465116	3630	tags=23%, list=7%, signal=21%	SPART/ACTA2/TLN1/NDUFS1/MYH10/CNOT1/GYS1/RUFY1/CHD4/ACTC1/ANP32E/IQGAP1/NDUFA11/RAC1/HNRNPM/UBASH3B/PCBP2/DHX9/NCKAP1
RPRD2	0.908581	1.34436	0.0105002	2347	tags=17%, list=4%, signal=16%	ANP32E/DHX9/HNRNPU/IPO7/NDUFS1/MYH9/ACTN4/RPA1/SMPD4/TLN1/HNRNPH1/IPO4/SLC2A3/NDUFS2
FOXD4L5	0.913471	1.34428	0.0463939	2571	tags=10%, list=5%, signal=9%	RPA1/RPN1/CHCHD3/IPO7/TRIP6/OXSM/AAAS/RRP1
PIGBOS1	0.788328	1.34425	0.0463415	4687	tags=27%, list=9%, signal=25%	PCBP2/ACTA1/BRK1/GTF2I/SAFB2/SQSTM1/CHD4/PRC1/CD2AP/PPM1F/NDUFA11/TRIP6/CNOT1/FANCI/INF2/HNRNPM/CAPZB/TNKS1BP1/TARDBP/RPA1/PRDX1/HNRNPH1/NDUFC1
AC116337.3	0.768425	1.34418	0.042029	2316	tags=21%, list=4%, signal=21%	NDUFA11/EPAS1/MYH10/ACTC1/RNH1/SAMM50/SLC2A1/CD2AP/LRPPRC/IPO7/HNRNPM/TRIP6/NDUFA10/SQSTM1/RAC1/ANP32E/NSUN2/BOP1
COMMD3	0.834575	1.34415	0.0306122	3440	tags=24%, list=6%, signal=22%	MYL6/NDUFA11/CHD4/BRK1/GTF2I/BOP1/CNOT1/RAC1/TLN1/NDUFC1/ANP32E/LRPPRC/AAAS/HNRNPM/SLC7A11/DSTN/IPO4/EPAS1/SQSTM1/NDUFS1
BORCS5	0.809933	1.34415	0.042953	2567	tags=13%, list=5%, signal=13%	STRAP/HNRNPH1/RNH1/HNRNPM/FANCI/DHX9/CHCHD3/RAC1/SLC2A3/SMPD4/NCKAP1
GALNT10	0.862141	1.34411	0.0267244	2599	tags=31%, list=5%, signal=30%	IQGAP1/PML/UBASH3B/ABI2/NLN/RNH1/WASF2/PPM1F/RAC1/CHCHD3/SLC2A1/NCKAP1/AAAS/CAPZB/PRDX1/BOP1/RPN1/DSTN/GTF2I/MRPS17/IPO4/CYFIP1/ATXN10/NSUN2/EPAS1/ACTN4
ACTN1	0.845938	1.34408	0.0151595	3145	tags=29%, list=6%, signal=27%	DHX9/HNRNPM/MYH9/SART3/IQGAP1/TLN1/ABI2/ATXN10/FLNA/SPART/UBASH3B/ACTG1/CHCHD3/HNRNPH1/CAPZB/SQSTM1/NLN/NDUFA11/SAMM50/FANCI/INF2/PCBP2/LRPPRC/SLC2A3
BRD8	0.858691	1.34405	0.0200352	1603	tags=12%, list=3%, signal=12%	DHX9/HNRNPH1/SART3/RUFY1/RPA1/SMPD4/LRPPRC/SAFB2/AAAS/MRPS17
GMDS	0.752224	1.34404	0.0429129	3118	tags=20%, list=6%, signal=19%	TARDBP/CD2AP/RPN1/FANCI/PML/BRK1/RAC1/NDUFS2/ARMC6/PDLIM1/NDUFA11/INF2/PRC1/PPM1F/SLC2A1/CAPZB/AAAS
FAM222B	0.882509	1.34403	0.0202952	1345	tags=12%, list=2%, signal=12%	SMPD4/HNRNPU/HNRNPA3/ATXN10/GCN1/ABI2/LRPPRC/FLNB/WASF2/RAC1
TICRR	0.948218	1.34402	0.0151317	752	tags=14%, list=1%, signal=14%	FANCI/PRC1/HNRNPA3/RPA1/ABI2/AAAS/RPN1/SMPD4/SART3/ACTA1/PCBP2/HNRNPU
AKAP8	0.8844	1.34399	0.0102803	1379	tags=14%, list=3%, signal=14%	HNRNPU/SART3/SAFB2/HNRNPM/HNRNPH1/SMPD4/GYS1/HNRNPA3/DHX9/TARDBP/TLN1/CNOT1
AC025449.1	0.815285	1.34398	0.0352941	991	tags=6%, list=2%, signal=6%	CHD4/NDUFA11/RRP1/EPAS1/HNRNPH1
NIPA1	0.874425	1.34394	0.0146951	3429	tags=24%, list=6%, signal=22%	CYFIP1/NCKAP1/IQGAP1/LRPPRC/ABI2/DHX9/NDUFS1/IPO7/CD2AP/HNRNPH1/MYH9/GTF2I/ACTB/SLC3A2/MRPS17/TRIP6/NSUN2/INF2/SMPD4/FANCI
DCTN1	0.92077	1.34387	0.00331748	1953	tags=23%, list=4%, signal=22%	CNOT1/DHX9/CYFIP1/MYH9/ACTN4/NCKAP1/TLN1/EPAS1/LRPPRC/SMPD4/SART3/HNRNPM/WASF2/IQGAP1/CD2AP/ABI2/GTF2I/CHCHD3/HNRNPU
PROZ	0.774447	1.34386	0.0392638	3360	tags=15%, list=6%, signal=15%	RAC1/ACTB/NCKAP1/BOP1/CAPZB/UBASH3B/BRK1/NSUN2/IQGAP1/RNH1/PPM1F/ATXN10/PML
CBX8	0.773824	1.34384	0.0461923	3850	tags=29%, list=7%, signal=27%	SART3/ACTG1/ANP32E/SQSTM1/SMPD4/RRP1/IQGAP1/SAFB2/RNH1/AAAS/HNRNPH1/ACTB/CHD4/EPAS1/HNRNPM/MYH10/SLC3A2/TLN1/NDUFA10/BOP1/SPART/ACTA2/ARMC6/NCKAP1
MFAP1	0.892622	1.34376	0.014152	2892	tags=35%, list=5%, signal=33%	CYFIP1/SMPD4/HNRNPM/AAAS/HNRNPU/ARMC6/LRPPRC/TARDBP/RAC1/RUFY1/ATXN10/NDUFA10/STRAP/TNKS1BP1/IPO7/RNH1/IQGAP1/DHX9/RPA1/GTF2I/BRK1/MYL6/HNRNPH1/ZHX2/FANCI/SART3/RPN1/PRDX1/SLC2A1
BRAT1	0.854757	1.34366	0.0372093	1902	tags=20%, list=3%, signal=20%	SAFB2/SMPD4/AAAS/TARDBP/GYS1/RAC1/RRP1/GCN1/ARMC6/MYL6/SART3/FANCI/TRIP6/HNRNPM/RNH1/NLN/CD2AP
SNX32	0.873669	1.34364	0.0313253	2342	tags=17%, list=4%, signal=16%	TLN1/SAFB2/CD2AP/ANP32E/SLC7A11/SPART/EPAS1/PML/ACTG1/HNRNPU/HNRNPH1/ATXN10/STRAP/PRC1
AC026124.1	0.923089	1.34364	0.0391898	2227	tags=8%, list=4%, signal=8%	PDLIM1/SPART/MYH9/NLN/BRK1/IPO4/RPA1
TCF20	0.903258	1.34363	0.0125356	2555	tags=23%, list=5%, signal=22%	ATXN10/SART3/DHX9/SMPD4/NCKAP1/CNOT1/MYH9/GTF2I/FLNB/CYFIP1/ANP32E/CD2AP/ACTN4/INF2/PDLIM1/PPM1F/ZHX2/RPA1/IPO7
FXNP2	0.873304	1.34359	0.0465839	3840	tags=14%, list=7%, signal=13%	TLN1/CD2AP/TNKS1BP1/MRPS17/PPM1F/ZHX2/NUBPL/OXSM/GYS1/IPO4/RAC1/TARDBP
LIG1	0.907829	1.34356	0.0310424	1150	tags=18%, list=2%, signal=18%	FANCI/PRC1/SAFB2/GCN1/SART3/HNRNPA3/HNRNPM/RPA1/SMPD4/AAAS/HNRNPH1/GYS1/ANP32E/DBN1/PCBP2
CLCN7	0.90847	1.34355	0.0103826	1841	tags=20%, list=3%, signal=20%	CNOT1/GTF2I/NCKAP1/MYH9/SQSTM1/SMPD4/NLN/NUBPL/SART3/TLN1/GCN1/WASF2/FLNB/HNRNPH1/IPO7/PPM1F/SLC3A2
SMARCA4	0.913067	1.34345	0.00930083	1569	tags=25%, list=3%, signal=24%	SMPD4/ACTN4/HNRNPM/SAFB2/SART3/ABI2/HNRNPU/AAAS/RPA1/RUFY1/FLNA/GYS1/HNRNPA3/HNRNPH1/RRP1/DHX9/INF2/DBN1/PPM1F/NDUFA10/ACTB
CRYZL1	0.814273	1.34339	0.0359955	2530	tags=20%, list=5%, signal=19%	HNRNPA3/HNRNPU/DHX9/FANCI/RPA1/HNRNPH1/DSTN/PML/RRP1/ACTB/EPAS1/SLC2A3/ACTA1/INF2/FLNB/ACTA2/TRIP6
MKRN1	0.843564	1.34337	0.0397727	1550	tags=26%, list=3%, signal=25%	SART3/GCN1/GTF2I/RAC1/NLN/WASF2/ATXN10/IPO7/IPO4/ANP32E/BRK1/GYS1/TARDBP/UBASH3B/CHCHD3/MRPS17/PML/CD2AP/SMPD4/NCKAP1/RPA1/DSTN
EIF4ENIF1	0.913486	1.34337	0.00489609	1186	tags=25%, list=2%, signal=24%	ATXN10/SMPD4/HNRNPU/DHX9/HNRNPM/SART3/GCN1/HNRNPA3/MYH9/IPO7/CD2AP/NCKAP1/LRPPRC/SAMM50/DBN1/PDLIM1/FLNB/RAC1/ABI2/AAAS/TRIP6
SLC35B2	0.863273	1.34337	0.01598	3920	tags=27%, list=7%, signal=25%	AAAS/CD2AP/SMPD4/HNRNPA3/FANCI/LRPPRC/RPN1/ACTN4/SLC7A11/ACTB/CHCHD3/IQGAP1/ACTA2/ACTG2/PML/MYH10/FLNA/SLC2A3/PPM1F/ATXN10/RUFY1/HNRNPU/NCKAP1
CICP16	0.884501	1.34336	0.0295872	1461	tags=10%, list=3%, signal=9%	HNRNPH1/CNOT1/GTF2I/SMPD4/NDUFS1/FLNB/ACTN4/ARMC6
FADD	0.87101	1.34335	0.0315053	2414	tags=21%, list=4%, signal=21%	CNOT1/CYFIP1/MYH9/GTF2I/ACTN4/TLN1/RNH1/TNKS1BP1/STRAP/ACTA2/MRPS17/RRP1/SLC3A2/PPM1F/NSUN2/NCKAP1/SAFB2/SAMM50
NOS3	0.89486	1.34332	0.03367	838	tags=11%, list=2%, signal=11%	EPAS1/SPART/IQGAP1/ACTA2/CNOT1/FLNA/CYFIP1/MYH9/STRAP
KCNJ14	0.811186	1.34331	0.0359118	3441	tags=24%, list=6%, signal=22%	SAFB2/SMPD4/AAAS/DBN1/GCN1/EPAS1/NDUFC1/IPO4/SART3/RAC1/PDLIM1/GYS1/SPART/ARMC6/TNKS1BP1/SAMM50/ACTC1/TLN1/UBASH3B/RRP1
ARMC9	0.893341	1.34329	0.0104512	2212	tags=23%, list=4%, signal=22%	FANCI/DBN1/ABI2/SMPD4/HNRNPM/HNRNPA3/SLC2A1/CAPZB/SLC3A2/BRK1/ACTBL2/PPM1F/ACTG1/CD2AP/CHCHD3/HNRNPU/SPART/RPN1/MYH10
ASB8	0.867936	1.34327	0.0239535	2315	tags=26%, list=4%, signal=25%	GTF2I/NUBPL/CNOT1/NDUFS1/RPA1/DHX9/SART3/STRAP/CHCHD3/PDLIM1/MYH9/NDUFC1/TNKS1BP1/HNRNPM/NDUFA11/HNRNPU/PCBP2/BOP1/OXSM/CHD4/ACTA1/GCN1
WDR74	0.841371	1.34325	0.0320366	3298	tags=23%, list=6%, signal=21%	RNH1/SLC3A2/SART3/AAAS/FANCI/BOP1/LRPPRC/PCBP2/SAFB2/CYFIP1/IPO7/HNRNPM/CAPZB/SQSTM1/DHX9/FLNA/NUBPL/ACTB/TARDBP
TMEM209	0.887213	1.34324	0.0316431	1913	tags=15%, list=3%, signal=15%	DHX9/NCKAP1/IPO7/LRPPRC/CNOT1/ANP32E/CHCHD3/CD2AP/SMPD4/HNRNPU/GTF2I/RPN1/SART3
AC005329.1	0.850437	1.34323	0.035248	2503	tags=7%, list=5%, signal=7%	HNRNPH1/GCN1/CAPZB/BRK1/ACTBL2/MYH9
UTRN	0.875851	1.34317	0.0294118	2816	tags=20%, list=5%, signal=19%	IQGAP1/SMPD4/HNRNPA3/ABI2/HNRNPH1/DHX9/NCKAP1/UBASH3B/SART3/TLN1/LRPPRC/IPO7/NLN/OXSM/PPM1F/GYS1/RRP1
AC074008.1	0.951534	1.34316	0.0391312	1853	tags=6%, list=3%, signal=6%	WASF2/SLC2A1/ANP32E/GYS1/PPM1F
FEZ1	0.846157	1.34315	0.0372272	658	tags=8%, list=1%, signal=8%	ACTA2/FLNA/DBN1/IQGAP1/UBASH3B/ACTN4/WASF2
USP13	0.852538	1.34314	0.0295119	3295	tags=25%, list=6%, signal=24%	HNRNPH1/SMPD4/MYH9/ANP32E/HNRNPA3/NCKAP1/PML/GCN1/GTF2I/FANCI/FLNB/DHX9/PRC1/TARDBP/ACTA1/HNRNPU/IPO4/SLC2A3/INF2/WASF2/CHD4
PEX19	0.841384	1.34314	0.0391937	1279	tags=10%, list=2%, signal=9%	NDUFS2/RNH1/ACTN4/DHX9/GTF2I/TARDBP/ANP32E/SLC2A3
DUT	0.811002	1.34313	0.0287604	1644	tags=19%, list=3%, signal=19%	SART3/AAAS/NUBPL/PCBP2/NDUFA10/PRC1/TARDBP/HNRNPM/FLNB/DHX9/SQSTM1/PDLIM1/CD2AP/RPN1/DSTN/ACTG1
DCTN2	0.859505	1.34313	0.0176385	3807	tags=40%, list=7%, signal=38%	PCBP2/SART3/TARDBP/SMPD4/RUFY1/HNRNPA3/BRK1/CHCHD3/AAAS/RAC1/WASF2/MYL6/CAPZB/DBN1/HNRNPM/GCN1/NCKAP1/SQSTM1/STRAP/RRP1/SLC3A2/RNH1/PRDX1/NSUN2/SLC7A11/TRIP6/DHX9/PPM1F/HNRNPU/SLC2A3/NDUFA10/MYH10/NDUFS1/RPN1
DDB1	0.891057	1.34313	0.0106514	2523	tags=32%, list=5%, signal=31%	DHX9/LRPPRC/SART3/MYH9/CNOT1/GCN1/RNH1/IPO7/CAPZB/TNKS1BP1/SLC3A2/NSUN2/PRDX1/STRAP/ABI2/NLN/ACTN4/HNRNPU/RPA1/NCKAP1/PPM1F/BOP1/RPN1/PDLIM1/PCBP2/DSTN/NDUFS1
CCNYL1	0.859752	1.34311	0.0156468	2551	tags=18%, list=5%, signal=17%	SMPD4/ABI2/LRPPRC/FLNB/MYH10/NCKAP1/SART3/ACTB/HNRNPA3/ZHX2/HNRNPU/NDUFA11/ANP32E/ATXN10/RNH1
ERF	0.848802	1.34306	0.0182189	3037	tags=24%, list=6%, signal=23%	DHX9/ACTN4/HNRNPH1/SMPD4/HNRNPU/SART3/PDLIM1/ANP32E/ZHX2/MYH9/PCBP2/PRC1/NSUN2/RAC1/GYS1/STRAP/RPA1/SLC3A2/SQSTM1/AAAS
MT-CYB	0.816763	1.34306	0.0423216	3794	tags=21%, list=7%, signal=20%	BRK1/MYL6/RPN1/CHD4/SAMM50/HNRNPM/AAAS/RRP1/TRIP6/PCBP2/GCN1/SLC7A11/SLC2A3/STRAP/MYH10/GTF2I/DSTN/OXSM
IFT172	0.875167	1.34305	0.0102006	1737	tags=21%, list=3%, signal=21%	HNRNPU/HNRNPA3/SART3/SMPD4/HNRNPH1/RPA1/ABI2/FANCI/GYS1/TNKS1BP1/TARDBP/CAPZB/PRDX1/ACTA1/PRC1/AAAS/PCBP2/CHD4
DDX55	0.907165	1.34298	0.00703364	1192	tags=18%, list=2%, signal=17%	DHX9/SMPD4/HNRNPU/SART3/GCN1/LRPPRC/NCKAP1/FANCI/MYH9/IPO7/BRK1/HNRNPH1/GTF2I/SQSTM1/HNRNPA3
PAK2	0.861472	1.34297	0.0421286	2363	tags=25%, list=4%, signal=24%	HNRNPU/ACTN4/NCKAP1/PML/LRPPRC/IPO7/SART3/RAC1/NSUN2/CD2AP/IQGAP1/DHX9/CYFIP1/SLC2A3/CHCHD3/PPM1F/SMPD4/PCBP2/ABI2/NDUFA11/CAPZB
ZBTB45	0.889622	1.34294	0.0145497	2274	tags=24%, list=4%, signal=23%	ACTN4/SMPD4/RPA1/SAFB2/HNRNPM/GYS1/PPM1F/HNRNPU/SART3/GCN1/RNH1/AAAS/PDLIM1/ACTB/LRPPRC/ARMC6/CAPZB/WASF2/STRAP/DBN1
AC009554.2	0.794592	1.34292	0.033121	1818	tags=11%, list=3%, signal=10%	NDUFA11/CYFIP1/DHX9/ATXN10/CHD4/ACTG2/BOP1/ACTG1/CHCHD3
WDR46	0.874576	1.3429	0.0460674	1601	tags=21%, list=3%, signal=21%	RRP1/TARDBP/HNRNPM/NDUFA10/ACTB/CD2AP/PCBP2/IPO7/BOP1/TRIP6/SQSTM1/BRK1/RNH1/SAMM50/HNRNPA3/RAC1/NUBPL/SLC3A2
SPTLC2	0.878252	1.34285	0.0312471	1702	tags=20%, list=3%, signal=20%	FLNA/CYFIP1/IQGAP1/CNOT1/ATXN10/DHX9/NCKAP1/HNRNPU/TNKS1BP1/ACTB/WASF2/UBASH3B/NLN/RUFY1/RPN1/MYH9/SPART
ZNF550	0.864529	1.34285	0.0301339	1032	tags=11%, list=2%, signal=11%	HNRNPU/DHX9/SMPD4/HNRNPA3/HNRNPH1/LRPPRC/ABI2/ACTB/DBN1
TSFM	0.841275	1.34284	0.0319803	2634	tags=12%, list=5%, signal=11%	CNOT1/GTF2I/IPO7/IPO4/NSUN2/ATXN10/HNRNPH1/TARDBP/INF2/FANCI
Z92544.1	0.903198	1.34283	0.0102176	2688	tags=21%, list=5%, signal=20%	UBASH3B/GYS1/ABI2/CD2AP/HNRNPU/PPM1F/PCBP2/SPART/DBN1/SLC7A11/RRP1/WASF2/RAC1/INF2/TLN1/HNRNPH1/NDUFS2/SART3
MYL12A	0.787882	1.34277	0.0462633	2212	tags=19%, list=4%, signal=18%	RAC1/DSTN/MYH9/ATXN10/ACTB/PDLIM1/MYL6/CHCHD3/CYFIP1/LRPPRC/IQGAP1/UBASH3B/INF2/TARDBP/BOP1/NDUFS2
AEBP2	0.909175	1.34263	0.00689522	1436	tags=18%, list=3%, signal=17%	DHX9/SMPD4/SART3/NCKAP1/HNRNPU/STRAP/ABI2/CD2AP/ACTN4/IQGAP1/CHCHD3/SLC2A3/NDUFS1/DBN1/GCN1
TIMM10B	0.809261	1.3426	0.0399033	3586	tags=20%, list=7%, signal=19%	SART3/IPO7/LRPPRC/NCKAP1/HNRNPU/FANCI/ABI2/DHX9/SMPD4/WASF2/PPM1F/RNH1/PCBP2/PRDX1/FLNB/ACTN4/DSTN
TSN	0.893267	1.34255	0.00400434	688	tags=13%, list=1%, signal=13%	HNRNPU/SMPD4/NCKAP1/HNRNPA3/DHX9/HNRNPM/PCBP2/CD2AP/LRPPRC/SART3/RPA1
INTS14	0.877879	1.34252	0.0134563	1755	tags=18%, list=3%, signal=17%	DHX9/ACTN4/SART3/HNRNPM/SMPD4/AAAS/CNOT1/RPA1/IPO7/CYFIP1/HNRNPU/NCKAP1/PRC1/NSUN2/INF2
PARP2	0.869043	1.34243	0.0276243	1621	tags=17%, list=3%, signal=16%	HNRNPH1/SART3/AAAS/DHX9/HNRNPU/FANCI/HNRNPA3/NUBPL/ACTN4/ATXN10/SLC3A2/PRC1/INF2/SMPD4
ZFAT	0.847114	1.34237	0.0211104	1288	tags=18%, list=2%, signal=17%	SMPD4/WASF2/HNRNPM/SART3/HNRNPU/DHX9/HNRNPA3/LRPPRC/CD2AP/RPN1/FLNA/CYFIP1/PPM1F/ZHX2/NLN
RPL17	0.816267	1.34234	0.0290585	2578	tags=19%, list=5%, signal=18%	HNRNPA3/HNRNPM/HNRNPU/RUFY1/PCBP2/IPO4/SMPD4/RRP1/BOP1/MRPS17/SAFB2/LRPPRC/RPN1/GYS1/FANCI/FLNB
UBAP1	0.873559	1.34234	0.0279909	1807	tags=14%, list=3%, signal=14%	TLN1/CNOT1/DHX9/ACTN4/HNRNPM/GYS1/GCN1/SMPD4/TARDBP/GTF2I/NDUFS1/RPA1
BLOC1S5	0.853969	1.34227	0.0416198	2633	tags=21%, list=5%, signal=20%	CD2AP/DHX9/ATXN10/HNRNPU/ANP32E/HNRNPA3/TARDBP/HNRNPM/ACTN4/PML/NUBPL/TNKS1BP1/BOP1/SLC2A3/GYS1/SAFB2/NDUFS1/IQGAP1
TMCO4	0.827867	1.34219	0.0339181	2690	tags=17%, list=5%, signal=16%	CAPZB/WASF2/GYS1/PRDX1/SLC2A1/HNRNPH1/PML/CHCHD3/SQSTM1/NDUFC1/NDUFS2/FLNB/ARMC6/SART3
MAP7D3	0.781794	1.34217	0.0391198	2699	tags=23%, list=5%, signal=22%	IQGAP1/SART3/UBASH3B/SQSTM1/TLN1/SPART/FANCI/NDUFA11/PRDX1/NLN/TRIP6/SLC7A11/HNRNPH1/CD2AP/ACTC1/FLNA/SAFB2/IPO4/STRAP
TOPORS	0.913537	1.34216	0.00828479	1444	tags=10%, list=3%, signal=9%	GTF2I/CNOT1/DHX9/TLN1/IPO7/OXSM/MYH9/NLN
AC107021.2	0.803832	1.34213	0.0435323	2070	tags=12%, list=4%, signal=11%	HNRNPU/IPO7/HNRNPH1/WASF2/EPAS1/TARDBP/SART3/FANCI/ANP32E/OXSM
KATNB1	0.845922	1.34212	0.0442177	3057	tags=21%, list=6%, signal=20%	CNOT1/SART3/CHCHD3/ACTN4/HNRNPU/RUFY1/CAPZB/TLN1/BRK1/NSUN2/DHX9/RRP1/SQSTM1/WASF2/RNH1/STRAP/RPA1/PRDX1
RBM15B	0.886362	1.34212	0.0097074	3480	tags=31%, list=6%, signal=29%	SMPD4/WASF2/SART3/HNRNPU/CD2AP/SAFB2/HNRNPA3/AAAS/ABI2/CAPZB/DHX9/BRK1/SLC7A11/RRP1/GCN1/FANCI/NSUN2/RNH1/MYH9/RPA1/MYH10/ARMC6/PRDX1/TNKS1BP1/OXSM/ACTB
METTL21A	0.813971	1.34208	0.0416171	2763	tags=18%, list=5%, signal=17%	HNRNPA3/FANCI/SMPD4/ABI2/NCKAP1/GCN1/HNRNPU/CD2AP/PRC1/HNRNPM/ACTB/BRK1/PRDX1/RNH1/ARMC6
TRPC4AP	0.855641	1.34207	0.0295455	2409	tags=26%, list=4%, signal=25%	SMPD4/GCN1/SART3/AAAS/HNRNPA3/DHX9/PCBP2/FANCI/ABI2/HNRNPM/LRPPRC/ACTG1/GYS1/CHD4/SAFB2/DBN1/HNRNPH1/RNH1/RPA1/RUFY1/STRAP/IPO7
PEX5	0.825905	1.34204	0.0361305	1774	tags=19%, list=3%, signal=18%	GTF2I/STRAP/ZHX2/FLNB/GCN1/SAFB2/IPO7/CNOT1/AAAS/SMPD4/RPA1/NUBPL/LRPPRC/SLC3A2/NDUFC1/SAMM50
OS9	0.869535	1.34201	0.0256473	3164	tags=30%, list=6%, signal=28%	CNOT1/TLN1/ACTN4/SMPD4/RNH1/SQSTM1/HNRNPM/NUBPL/NDUFA11/GCN1/RPN1/CHCHD3/SLC7A11/NLN/NDUFS1/GTF2I/ATXN10/TNKS1BP1/HNRNPH1/MYL6/CYFIP1/MYH9/ACTG2/NDUFA10/UBASH3B
ZNF324	0.834717	1.34201	0.0417193	1476	tags=17%, list=3%, signal=16%	CNOT1/CD2AP/HNRNPM/SLC2A1/SART3/GYS1/SMPD4/ACTN4/TNKS1BP1/GCN1/GTF2I/ACTG1/ARMC6/NDUFS1
TRIM24	0.858626	1.34201	0.0209513	3338	tags=23%, list=6%, signal=21%	SMPD4/IPO7/GCN1/AAAS/ZHX2/PCBP2/GTF2I/FLNB/RPA1/LRPPRC/TNKS1BP1/OXSM/HNRNPU/PRC1/SART3/CHCHD3/DBN1/RRP1/IQGAP1
RELB	0.836776	1.34201	0.0470183	4464	tags=31%, list=8%, signal=28%	PML/HNRNPM/INF2/HNRNPU/ACTBL2/DBN1/ATXN10/SART3/BOP1/IQGAP1/RRP1/NDUFA10/RNH1/IPO4/RUFY1/NDUFS2/SLC2A1/CHD4/DSTN/LRPPRC/ACTB/TRIP6/BRK1/RAC1/PDLIM1/FLNB
RBM8A	0.833468	1.34195	0.0447248	2323	tags=23%, list=4%, signal=22%	HNRNPU/DHX9/HNRNPM/MYL6/TARDBP/SMPD4/PCBP2/AAAS/NDUFC1/RPN1/CHD4/ANP32E/SAFB2/NDUFA11/BRK1/NDUFA10/CHCHD3/NDUFS1/SLC3A2
EHD4	0.804492	1.34193	0.0421546	2882	tags=18%, list=5%, signal=17%	CYFIP1/MYH9/NSUN2/FLNA/MYL6/PML/PRC1/SLC3A2/RPN1/ACTA2/NUBPL/CHD4/FANCI/NDUFA11/TARDBP
ZNF26	0.891062	1.34192	0.0309486	1811	tags=13%, list=3%, signal=13%	SART3/HNRNPA3/SMPD4/ABI2/HNRNPU/HNRNPH1/FANCI/ANP32E/TARDBP/RUFY1/MYL6
TM9SF4	0.89768	1.34191	0.0202515	2423	tags=21%, list=4%, signal=21%	SMPD4/DHX9/ACTN4/TLN1/SART3/HNRNPM/CNOT1/GTF2I/MYH10/GYS1/SLC2A1/MYH9/OXSM/TRIP6/ATXN10/RUFY1/FANCI/ANP32E
CD276	0.858657	1.34189	0.0108881	971	tags=19%, list=2%, signal=19%	ATXN10/ABI2/SART3/SMPD4/HNRNPA3/INF2/ACTG1/PML/PCBP2/HNRNPM/DBN1/CYFIP1/TRIP6/FLNA/DHX9/MYH9
PPT2-EGFL8	0.837442	1.34183	0.0428397	3423	tags=14%, list=6%, signal=13%	HNRNPH1/SMPD4/SART3/INF2/GTF2I/ANP32E/RPA1/LRPPRC/PDLIM1/NDUFS2/ATXN10/NDUFA11
TBL1XR1	0.864035	1.34182	0.0293798	1763	tags=19%, list=3%, signal=18%	HNRNPU/TARDBP/HNRNPA3/WASF2/SMPD4/CD2AP/NCKAP1/DHX9/SART3/MYH9/FLNB/FANCI/BRK1/ZHX2/DBN1/EPAS1
AFAP1L2	0.931233	1.34181	0.00611504	1009	tags=12%, list=2%, signal=12%	UBASH3B/FLNA/IQGAP1/ACTA2/CNOT1/ABI2/NDUFA10/DBN1/WASF2/ACTC1
UBR3	0.898241	1.3418	0.0302352	2483	tags=18%, list=5%, signal=17%	NDUFS1/NCKAP1/CNOT1/GTF2I/NDUFA11/PCBP2/SMPD4/NLN/CYFIP1/RRP1/TLN1/EPAS1/BOP1/NDUFA10/DHX9
PLGRKT	0.8012	1.34179	0.0327869	4488	tags=21%, list=8%, signal=20%	CAPZB/RNH1/NDUFS2/RAC1/SLC2A1/TARDBP/MYL6/TLN1/ACTB/ACTA1/ACTG2/BOP1/CHCHD3/ARMC6/PCBP2/ATXN10/STRAP/NCKAP1
TAF3	0.911187	1.34178	0.00786689	1348	tags=15%, list=2%, signal=15%	DHX9/SART3/HNRNPU/FANCI/RPA1/ACTN4/HNRNPM/MYH10/SMPD4/TLN1/PCBP2/HNRNPA3/GYS1
AC012513.3	0.802494	1.34177	0.0402439	3711	tags=21%, list=7%, signal=20%	RPA1/LRPPRC/ABI2/HNRNPH1/SMPD4/DHX9/PPM1F/HNRNPM/NCKAP1/CNOT1/DSTN/EPAS1/FANCI/NDUFA11/NDUFS1/NDUFC1/HNRNPU/ACTG2
KRT18P49	0.928941	1.34176	0.0385445	2864	tags=11%, list=5%, signal=10%	SQSTM1/DSTN/NDUFA11/CYFIP1/CNOT1/ZHX2/MYH10/MRPS17/OXSM
CCT2	0.909622	1.34176	0.0120704	1950	tags=31%, list=4%, signal=30%	SMPD4/HNRNPM/DHX9/PCBP2/SART3/GCN1/HNRNPA3/LRPPRC/AAAS/SQSTM1/RPA1/HNRNPU/STRAP/CNOT1/DBN1/ACTG1/BRK1/SLC2A1/PRDX1/FANCI/BOP1/RAC1/CHCHD3/PPM1F/SLC3A2/NSUN2
ATP5MGP1	0.757197	1.34176	0.0363299	4927	tags=21%, list=9%, signal=20%	CHD4/RRP1/RAC1/IQGAP1/NDUFS1/IPO4/WASF2/TARDBP/GYS1/SQSTM1/NUBPL/IPO7/CD2AP/BRK1/RPA1/MRPS17/STRAP/NCKAP1
KHSRP	0.900075	1.34174	0.0123989	2096	tags=23%, list=4%, signal=22%	SAFB2/SMPD4/SART3/HNRNPU/AAAS/HNRNPH1/DHX9/HNRNPM/RPA1/ACTN4/GCN1/HNRNPA3/IPO7/LRPPRC/GYS1/MYH10/ABI2/ACTA1/ACTG1
TTI1	0.92746	1.34172	0.00385782	2469	tags=26%, list=4%, signal=25%	DHX9/SMPD4/FANCI/SART3/GCN1/HNRNPU/HNRNPM/HNRNPH1/ACTN4/WASF2/AAAS/IPO7/RPA1/FLNB/CHCHD3/CNOT1/PRDX1/SLC3A2/RUFY1/NDUFA10/MYH9/ANP32E
DCAF16	0.897523	1.34172	0.0059822	2866	tags=21%, list=5%, signal=20%	SMPD4/HNRNPH1/SART3/HNRNPU/FANCI/ABI2/HNRNPA3/HNRNPM/PCBP2/PPM1F/WASF2/DHX9/NCKAP1/FLNB/GYS1/EPAS1/DBN1/PML
STK35	0.865914	1.34169	0.0427447	1960	tags=17%, list=4%, signal=16%	GCN1/SMPD4/AAAS/WASF2/DHX9/SART3/ATXN10/HNRNPH1/HNRNPU/HNRNPM/ABI2/RUFY1/NCKAP1/NDUFA10
IGF2R	0.848433	1.34166	0.03386	3718	tags=27%, list=7%, signal=26%	NCKAP1/DHX9/TLN1/CNOT1/IPO7/SMPD4/GTF2I/MYH9/GCN1/OXSM/FLNB/WASF2/PDLIM1/NSUN2/GYS1/NDUFS2/SLC2A3/STRAP/PML/RAC1/ACTG2/SQSTM1/ACTA2
CDC26	0.832366	1.34165	0.0296209	4255	tags=27%, list=8%, signal=25%	HNRNPM/BRK1/TARDBP/TLN1/HNRNPU/RAC1/OXSM/PCBP2/FANCI/AAAS/RPA1/SMPD4/MYH10/NCKAP1/SPART/CAPZB/INF2/FLNB/TRIP6/RNH1/GTF2I/NDUFC1/NDUFS2
URI1	0.869636	1.34162	0.0245709	1277	tags=18%, list=2%, signal=17%	HNRNPM/ACTN4/DHX9/IPO7/RPA1/IQGAP1/ACTG1/NDUFA10/TNKS1BP1/LRPPRC/STRAP/AAAS/SART3/ABI2/HNRNPU
ZBTB40	0.905744	1.34158	0.0062954	2225	tags=20%, list=4%, signal=19%	WASF2/GCN1/CD2AP/SART3/AAAS/HNRNPH1/HNRNPU/SMPD4/MYH10/CAPZB/RPA1/PRDX1/LRPPRC/UBASH3B/ACTN4/GYS1/TLN1
CALM3	0.821671	1.34156	0.0319635	3176	tags=31%, list=6%, signal=29%	DHX9/HNRNPM/PPM1F/RPA1/ACTN4/TARDBP/SMPD4/GYS1/HNRNPU/PML/SART3/TNKS1BP1/CAPZB/RPN1/GCN1/AAAS/ZHX2/IQGAP1/CD2AP/RRP1/SLC2A1/RAC1/STRAP/ACTB/SLC7A11/MYL6
AP001453.2	0.799085	1.34147	0.0397436	4035	tags=15%, list=7%, signal=14%	TNKS1BP1/SART3/RNH1/NDUFA11/SMPD4/TARDBP/HNRNPH1/NDUFC1/NDUFA10/RAC1/DBN1/AAAS/SLC7A11
RFT1	0.838285	1.34147	0.0238121	3101	tags=21%, list=6%, signal=20%	TARDBP/FANCI/DHX9/HNRNPU/SMPD4/LRPPRC/GCN1/BRK1/RAC1/ACTN4/ATXN10/WASF2/PRC1/HNRNPM/SAMM50/RNH1/IPO4/EPAS1
CDK4	0.913539	1.34146	0.0102875	1706	tags=23%, list=3%, signal=22%	SART3/HNRNPM/DHX9/SMPD4/PCBP2/LRPPRC/HNRNPU/AAAS/HNRNPA3/GCN1/CHCHD3/ACTN4/HNRNPH1/FANCI/MYH9/CHD4/WASF2/PPM1F/ACTG1
WDR70	0.85404	1.34143	0.0333704	2834	tags=25%, list=5%, signal=24%	AAAS/TARDBP/NSUN2/RPA1/HNRNPM/HNRNPU/SART3/ACTB/NDUFA10/RNH1/RUFY1/SMPD4/ANP32E/MYL6/GCN1/EPAS1/CAPZB/BRK1/IPO4/PRC1/FLNB
ABT1	0.850182	1.34142	0.0498221	1161	tags=15%, list=2%, signal=15%	DHX9/SMPD4/HNRNPU/AAAS/CD2AP/ANP32E/PCBP2/FANCI/RAC1/HNRNPM/SART3/BOP1/RNH1
AC016903.1	0.98057	1.34137	0.0367236	1070	tags=1%, list=2%, signal=1%	EPAS1
TFG	0.827095	1.34134	0.0394589	2511	tags=26%, list=5%, signal=25%	NCKAP1/DHX9/SART3/HNRNPA3/MYH9/LRPPRC/ACTA1/RPN1/CD2AP/CYFIP1/STRAP/CAPZB/ATXN10/OXSM/ACTB/RAC1/IPO7/RPA1/NSUN2/AAAS/SLC7A11/FLNB
SLC39A1	0.845187	1.3413	0.0215317	2462	tags=27%, list=4%, signal=26%	GCN1/SMPD4/NDUFS1/NSUN2/HNRNPU/RRP1/ACTN4/SAFB2/SART3/NDUFS2/ANP32E/PRC1/TRIP6/DHX9/CYFIP1/PDLIM1/MYH9/CHCHD3/ABI2/NLN/HNRNPA3/PML/DSTN
GRN	0.835569	1.34129	0.0350877	2979	tags=23%, list=5%, signal=21%	RNH1/CAPZB/FLNA/MYL6/FANCI/HNRNPM/RPN1/ACTB/SQSTM1/DHX9/GCN1/CYFIP1/SAFB2/RRP1/IQGAP1/TARDBP/SLC3A2/SLC7A11/NDUFS2
C11orf45	0.840519	1.34128	0.0247824	2152	tags=10%, list=4%, signal=9%	UBASH3B/ACTB/ABI2/IQGAP1/BOP1/SQSTM1/MYH9/MRPS17
ARHGAP44	0.843555	1.34123	0.036635	4311	tags=23%, list=8%, signal=21%	NCKAP1/CHCHD3/HNRNPA3/PRDX1/ABI2/NUBPL/OXSM/SQSTM1/ACTG2/DBN1/ACTA2/ACTB/GYS1/SLC7A11/SPART/CYFIP1/MYL6/UBASH3B/PCBP2
ARSI	0.866624	1.3412	0.0231154	2739	tags=14%, list=5%, signal=14%	DBN1/UBASH3B/IQGAP1/DHX9/FLNA/PPM1F/DSTN/RPA1/ACTA2/IPO4/AAAS/ACTG1
AC004803.1	0.806579	1.3412	0.0432692	2980	tags=20%, list=5%, signal=19%	STRAP/NCKAP1/HNRNPM/CYFIP1/FLNB/ABI2/GCN1/CNOT1/CHCHD3/ACTB/SLC7A11/MRPS17/SMPD4/UBASH3B/NUBPL/ARMC6/WASF2
AC095055.1	0.813616	1.3412	0.0485564	3760	tags=19%, list=7%, signal=18%	UBASH3B/PDLIM1/SMPD4/FLNA/RAC1/ACTB/SLC2A1/ACTA2/FANCI/DSTN/NDUFC1/NDUFA11/TLN1/RPA1/GCN1/ACTN4
PROC	0.895579	1.34119	0.0180775	1714	tags=13%, list=3%, signal=13%	IQGAP1/TLN1/TNKS1BP1/MYH9/ACTC1/DBN1/SLC2A1/UBASH3B/NUBPL/AAAS/CAPZB
PRRX1	0.908495	1.34117	0.0204593	2629	tags=18%, list=5%, signal=17%	FLNA/UBASH3B/IQGAP1/GCN1/SMPD4/SART3/ACTA2/CYFIP1/SPART/ATXN10/PML/SLC7A11/SLC2A3/PPM1F/SAMM50
GALNT2	0.796392	1.34117	0.0389016	3083	tags=14%, list=6%, signal=14%	GTF2I/DHX9/TLN1/TNKS1BP1/MYL6/ACTN4/ATXN10/HNRNPU/GCN1/STRAP/CD2AP/ANP32E
PAK4	0.88426	1.34117	0.0113868	2371	tags=25%, list=4%, signal=24%	SAFB2/GYS1/ACTN4/SMPD4/AAAS/SART3/DHX9/HNRNPU/HNRNPM/ABI2/RPA1/NDUFC1/RUFY1/PRC1/ANP32E/PCBP2/ACTA1/IPO7/PRDX1/CHD4/FLNB
CAPS2-AS1	0.975989	1.34111	0.0143949	1322	tags=1%, list=2%, signal=1%	SLC2A3
BICRA	0.846943	1.34109	0.0369128	2814	tags=24%, list=5%, signal=23%	SAFB2/SMPD4/HNRNPU/GYS1/SART3/CD2AP/ABI2/TLN1/ACTN4/TNKS1BP1/BRK1/HNRNPA3/FLNA/NDUFA11/CAPZB/MYH9/RRP1/IPO4/AAAS/RNH1
CRTC3	0.89627	1.34107	0.0071481	1969	tags=17%, list=4%, signal=16%	IQGAP1/HNRNPU/CYFIP1/PML/NCKAP1/ABI2/DSTN/PDLIM1/ATXN10/CHD4/DHX9/SMPD4/NDUFA10/SART3
FTO	0.881595	1.341	0.037037	2165	tags=12%, list=4%, signal=11%	CNOT1/NDUFS1/MYH9/ZHX2/CYFIP1/TLN1/BOP1/NUBPL/ATXN10/RNH1
AC078899.1	0.833749	1.34092	0.0437756	2989	tags=17%, list=5%, signal=16%	CYFIP1/NCKAP1/TLN1/CNOT1/ACTBL2/ACTN4/NSUN2/WASF2/BOP1/GTF2I/SLC3A2/ARMC6/SQSTM1/PML
PPIH	0.877132	1.34087	0.036677	3384	tags=25%, list=6%, signal=24%	CHD4/TARDBP/FANCI/BRK1/HNRNPA3/AAAS/RAC1/NDUFA11/PRC1/WASF2/NDUFC1/MYL6/GTF2I/CAPZB/RRP1/SLC2A1/IPO4/MYH9/STRAP/PRDX1/BOP1
MCM4	0.90532	1.34085	0.0428894	2065	tags=25%, list=4%, signal=24%	HNRNPA3/DHX9/HNRNPM/FANCI/SMPD4/HNRNPU/RPA1/TARDBP/SART3/WASF2/ABI2/CHCHD3/PRC1/CYFIP1/ATXN10/IPO7/MYH9/RPN1/FLNA/NDUFS2/GCN1
SEC22C	0.895524	1.34084	0.00611527	2942	tags=29%, list=5%, signal=27%	TLN1/NCKAP1/WASF2/ABI2/SMPD4/GTF2I/FLNB/GCN1/ACTN4/CNOT1/FANCI/DHX9/NDUFA10/RPN1/DSTN/IPO7/SART3/ACTG1/ACTA2/RPA1/PRDX1/PRC1/CYFIP1/CD2AP
ARSA	0.77221	1.34084	0.0468354	2421	tags=13%, list=4%, signal=13%	RNH1/NUBPL/SAMM50/SLC3A2/NDUFS2/HNRNPU/ATXN10/IPO4/NCKAP1/ACTG1/NDUFA10
KATNA1	0.847546	1.34079	0.0464326	1887	tags=18%, list=3%, signal=17%	HNRNPM/HNRNPU/HNRNPA3/CAPZB/WASF2/FANCI/PML/TARDBP/AAAS/SMPD4/LRPPRC/ANP32E/RPA1/ACTN4/TNKS1BP1
NUP50	0.836937	1.34073	0.0344037	1068	tags=17%, list=2%, signal=16%	ATXN10/ABI2/NCKAP1/SMPD4/GCN1/CD2AP/CYFIP1/HNRNPA3/DHX9/MYH9/SAMM50/STRAP/IPO7/SART3
ARHGAP10	0.78146	1.34055	0.0457433	3606	tags=13%, list=7%, signal=12%	IQGAP1/ACTA2/SPART/SLC2A3/ANP32E/BOP1/SLC7A11/CHCHD3/TNKS1BP1/ACTG2/SMPD4
ACTG1	0.796121	1.34055	0.032596	4442	tags=24%, list=8%, signal=22%	ABI2/ACTB/HNRNPU/TLN1/UBASH3B/CD2AP/RPA1/FLNA/SAFB2/DBN1/TNKS1BP1/TARDBP/DHX9/HNRNPA3/ATXN10/IPO4/NSUN2/SAMM50/HNRNPM/ZHX2
EIF5AP4	0.766125	1.34048	0.0497449	4996	tags=25%, list=9%, signal=23%	STRAP/CNOT1/CYFIP1/WASF2/DBN1/OXSM/INF2/IPO7/ZHX2/NDUFS2/NLN/RRP1/ACTA2/ACTA1/HNRNPM/ACTG2/TRIP6/TLN1/SAFB2/ACTC1/RUFY1
ZDHHC18	0.825511	1.34048	0.0429864	2523	tags=21%, list=5%, signal=20%	WASF2/HNRNPU/SART3/ANP32E/HNRNPA3/TARDBP/DHX9/FANCI/DBN1/PCBP2/AAAS/NDUFA11/ACTG1/NCKAP1/CAPZB/HNRNPH1/GCN1/MYH9
BRD7	0.864784	1.34047	0.0364706	2589	tags=23%, list=5%, signal=22%	DHX9/IPO7/NCKAP1/HNRNPM/HNRNPU/CNOT1/CHCHD3/ACTN4/TLN1/PCBP2/ATXN10/GYS1/CD2AP/SART3/NLN/MYH9/PDLIM1/ABI2/NUBPL
ZC3H15	0.903059	1.34047	0.0169987	1560	tags=18%, list=3%, signal=17%	NCKAP1/HNRNPU/DHX9/LRPPRC/IPO7/NDUFS1/MYH9/ATXN10/HNRNPM/ABI2/CYFIP1/CHCHD3/STRAP/GTF2I/TARDBP
AMMECR1L	0.910561	1.34037	0.0069932	2266	tags=25%, list=4%, signal=24%	SMPD4/NCKAP1/IPO7/DHX9/GTF2I/CD2AP/SART3/WASF2/HNRNPU/SQSTM1/LRPPRC/ATXN10/EPAS1/IPO4/ACTG2/CYFIP1/INF2/PPM1F/STRAP/MYL6/SAMM50
COPA	0.88137	1.34037	0.017139	3053	tags=31%, list=6%, signal=29%	DHX9/SMPD4/HNRNPU/ACTN4/NSUN2/CNOT1/IPO7/MYH9/SQSTM1/GCN1/NDUFS2/TLN1/PRDX1/NDUFS1/ANP32E/SART3/FLNB/SLC2A3/NCKAP1/PPM1F/ACTB/NLN/CHCHD3/MYH10/TRIP6/ARMC6
AC011365.1	0.890234	1.34035	0.0174246	1556	tags=8%, list=3%, signal=8%	ACTA2/NCKAP1/MYH10/NSUN2/IQGAP1/ACTBL2/ACTG1
PTPN23	0.901543	1.34027	0.00577797	1636	tags=23%, list=3%, signal=22%	SART3/DHX9/SMPD4/ZHX2/HNRNPU/WASF2/GCN1/AAAS/RPA1/SAFB2/BOP1/CAPZB/LRPPRC/ACTG1/BRK1/SQSTM1/IQGAP1/HNRNPA3/PCBP2
EHMT2-AS1	0.854936	1.34027	0.0258321	4988	tags=25%, list=9%, signal=23%	SMPD4/CD2AP/DBN1/SART3/NUBPL/FANCI/PRC1/NDUFA10/ABI2/SLC2A3/SAFB2/UBASH3B/IPO4/RPN1/SLC7A11/RNH1/FLNA/GCN1/ARMC6/FLNB/ZHX2
CLIC1	0.886447	1.34026	0.0207544	2728	tags=25%, list=5%, signal=24%	HNRNPA3/TARDBP/BRK1/GCN1/ABI2/NDUFS2/HNRNPU/HNRNPH1/RPN1/DSTN/PDLIM1/CHD4/NLN/ANP32E/SMPD4/AAAS/PPM1F/CAPZB/DBN1/RPA1/NDUFC1
KIF5B	0.895104	1.34023	0.00802662	2030	tags=14%, list=4%, signal=14%	NCKAP1/CD2AP/IPO7/HNRNPU/SMPD4/DBN1/MYH9/TARDBP/PRDX1/GYS1/DSTN/HNRNPM
LEAP2	0.813808	1.34022	0.035109	3228	tags=24%, list=6%, signal=22%	SLC2A1/GYS1/HNRNPM/DHX9/RAC1/TARDBP/FLNA/DSTN/CHCHD3/MYH10/SAFB2/PCBP2/BRK1/SLC2A3/NDUFA10/SLC7A11/ACTB/PML/SAMM50/NLN
DNAJC21	0.88104	1.34021	0.0192538	1326	tags=15%, list=2%, signal=15%	NSUN2/DHX9/LRPPRC/MYH9/HNRNPU/CYFIP1/HNRNPM/GCN1/IPO7/RUFY1/SART3/TNKS1BP1/SMPD4
LAMTOR5	0.830922	1.3402	0.0412371	3479	tags=20%, list=6%, signal=19%	BRK1/TARDBP/PCBP2/UBASH3B/EPAS1/CAPZB/MYL6/GTF2I/PRDX1/HNRNPU/IPO4/RUFY1/ACTA2/HNRNPH1/ACTN4/OXSM/NLN
BSCL2	0.828882	1.34014	0.0408654	4136	tags=24%, list=8%, signal=22%	CNOT1/GTF2I/ANP32E/SMPD4/ACTN4/SAMM50/BOP1/SPART/ACTG1/RAC1/PDLIM1/BRK1/FLNA/SLC7A11/IPO4/EPAS1/MYH9/CAPZB/ZHX2/ARMC6
CFL1	0.88232	1.34004	0.00603645	2103	tags=20%, list=4%, signal=19%	ACTB/BRK1/RAC1/TARDBP/UBASH3B/CHD4/CAPZB/SART3/DBN1/BOP1/HNRNPM/GTF2I/HNRNPA3/RRP1/RNH1/CHCHD3/NUBPL
PBDC1	0.804235	1.34003	0.0454545	3133	tags=21%, list=6%, signal=20%	HNRNPM/RAC1/TARDBP/ACTB/STRAP/TRIP6/HNRNPA3/OXSM/SQSTM1/MYL6/BRK1/IPO7/ACTG1/FANCI/ACTG2/NUBPL/MYH10/RNH1
PXYLP1	0.81177	1.34002	0.0448878	2586	tags=15%, list=5%, signal=15%	RPA1/DHX9/SART3/HNRNPM/ABI2/CD2AP/HNRNPH1/SAMM50/CHD4/TLN1/INF2/STRAP/FANCI
HNRNPH3	0.889267	1.34002	0.00696078	1233	tags=17%, list=2%, signal=16%	HNRNPA3/HNRNPH1/DHX9/ABI2/FANCI/SART3/HNRNPU/TARDBP/ANP32E/AAAS/PRC1/SAFB2/GYS1/PCBP2
LINC01220	0.838539	1.34002	0.0363636	2134	tags=12%, list=4%, signal=11%	RNH1/DBN1/UBASH3B/IQGAP1/BRK1/NSUN2/SLC2A3/PML/SLC2A1/CYFIP1
ICAM2	0.791393	1.34	0.044586	1329	tags=11%, list=2%, signal=10%	DBN1/ACTA2/FLNA/STRAP/IQGAP1/TRIP6/SLC2A3/CAPZB/HNRNPM
PWWP2A	0.890576	1.33991	0.00700912	2238	tags=21%, list=4%, signal=21%	HNRNPH1/DHX9/NCKAP1/SART3/RUFY1/SMPD4/IPO7/ANP32E/ABI2/GCN1/SLC2A3/IQGAP1/CYFIP1/CD2AP/TLN1/TRIP6/HNRNPA3/CHCHD3
AC241585.1	0.794041	1.33985	0.0369487	3399	tags=21%, list=6%, signal=20%	CYFIP1/GTF2I/CNOT1/NCKAP1/IQGAP1/HNRNPM/ACTN4/STRAP/NDUFA11/CHCHD3/ACTA2/IPO7/NDUFS2/PML/FLNA/RNH1/TLN1/RPN1
HSF2	0.88723	1.33984	0.0316384	1379	tags=23%, list=3%, signal=22%	HNRNPA3/HNRNPU/SART3/DHX9/SMPD4/HNRNPH1/FANCI/HNRNPM/TARDBP/PCBP2/CD2AP/AAAS/RPA1/ANP32E/NCKAP1/ACTA1/CHD4/MYH9/IQGAP1
CLN6	0.896083	1.33984	0.00699861	698	tags=12%, list=1%, signal=12%	CNOT1/SMPD4/FANCI/MYH9/SART3/DHX9/NSUN2/GCN1/PRC1/RPA1
LRRFIP1P1	0.862947	1.33981	0.0253699	1873	tags=17%, list=3%, signal=16%	FANCI/HNRNPA3/CYFIP1/HNRNPH1/NCKAP1/CD2AP/DHX9/ABI2/SQSTM1/TRIP6/LRPPRC/RPA1/NDUFS1/HNRNPM
UPF2	0.91385	1.33974	0.00647443	2055	tags=19%, list=4%, signal=18%	DHX9/IPO7/CYFIP1/NCKAP1/ACTN4/SMPD4/SART3/HNRNPU/MYH9/CD2AP/LRPPRC/AAAS/RPA1/NDUFC1/NLN/FLNB
AC005726.2	0.874911	1.33973	0.0302385	1875	tags=12%, list=3%, signal=12%	CYFIP1/NSUN2/HNRNPH1/FLNB/ACTC1/PML/RUFY1/MYH10/MRPS17/OXSM
DCLRE1B	0.931711	1.3397	0.00198698	1906	tags=21%, list=3%, signal=21%	DHX9/HNRNPM/RPA1/FANCI/HNRNPA3/SART3/TARDBP/HNRNPU/SMPD4/HNRNPH1/STRAP/CAPZB/MYH9/RPN1/ACTB/FLNB/RRP1/GTF2I
AL021920.1	0.915145	1.33965	0.0349816	3114	tags=13%, list=6%, signal=12%	ABI2/SLC2A3/GCN1/HNRNPU/BOP1/ACTN4/ANP32E/ACTC1/IPO7/GYS1/ACTG2
XXYLT1	0.884628	1.3396	0.00818384	2523	tags=25%, list=5%, signal=24%	SAFB2/HNRNPU/ABI2/IQGAP1/RPA1/CHD4/HNRNPA3/ACTN4/DHX9/GYS1/ACTG1/DBN1/WASF2/AAAS/HNRNPM/FLNA/RRP1/MYH10/PPM1F/SLC2A1/TARDBP
PCGF2	0.830895	1.3396	0.0269456	3918	tags=29%, list=7%, signal=27%	SMPD4/SART3/TLN1/MYH9/CD2AP/ABI2/ACTG1/NLN/SLC3A2/NCKAP1/SAFB2/STRAP/DHX9/IPO7/RPA1/PPM1F/HNRNPM/AAAS/ZHX2/UBASH3B/TNKS1BP1/MYH10/DBN1/INF2
GATAD2B	0.908961	1.33958	0.0224026	1867	tags=17%, list=3%, signal=16%	DHX9/HNRNPU/ANP32E/RPA1/HNRNPH1/NCKAP1/MYH9/SMPD4/ACTN4/CD2AP/PCBP2/RNH1/SAFB2/PML
P3H1	0.852589	1.33958	0.0424581	1254	tags=18%, list=2%, signal=17%	SART3/WASF2/HNRNPA3/AAAS/TARDBP/PRDX1/RPN1/HNRNPM/BRK1/ABI2/CAPZB/NSUN2/CHD4/SLC2A1/HNRNPU
CCDC81	0.796867	1.33956	0.0470588	2020	tags=15%, list=4%, signal=15%	IQGAP1/FLNA/HNRNPH1/PCBP2/ACTA2/LRPPRC/SPART/ACTA1/GYS1/ABI2/RNH1/ACTC1/ACTG2
SNRPGP15	0.819707	1.33952	0.0332103	2432	tags=15%, list=4%, signal=15%	NCKAP1/CD2AP/IPO7/DHX9/MYH9/NDUFS1/GCN1/ACTG1/ACTA2/SPART/CHD4/HNRNPH1/SMPD4
PRPF19	0.859636	1.33951	0.016856	2746	tags=30%, list=5%, signal=28%	AAAS/SMPD4/GCN1/BRK1/CAPZB/RRP1/RNH1/SLC2A1/SART3/BOP1/TARDBP/RPN1/RUFY1/SAMM50/WASF2/NSUN2/SLC3A2/RAC1/FLNB/CHCHD3/IPO7/PML/PCBP2/ACTG1/TLN1
SDHAP1	0.83412	1.33943	0.0395034	2959	tags=15%, list=5%, signal=15%	ABI2/HNRNPH1/HNRNPU/SAFB2/SART3/HNRNPA3/NDUFA11/TLN1/DSTN/GYS1/MYL6/TRIP6/MYH9
UBC	0.815461	1.33942	0.0364706	4268	tags=33%, list=8%, signal=31%	DHX9/NSUN2/CNOT1/SLC3A2/GTF2I/MYH9/HNRNPU/HNRNPM/ACTN4/IPO7/UBASH3B/PDLIM1/MYL6/RNH1/TNKS1BP1/GCN1/SLC2A1/AAAS/WASF2/BOP1/PPM1F/NDUFS2/OXSM/ZHX2/CAPZB/ACTG1/EPAS1/DBN1
NR1H4	0.847776	1.33942	0.0473146	3628	tags=33%, list=7%, signal=31%	RAC1/HNRNPM/ACTN4/STRAP/ABI2/ATXN10/UBASH3B/TNKS1BP1/IQGAP1/RUFY1/HNRNPU/NDUFA10/BOP1/SMPD4/SART3/MYH9/MYH10/NDUFS2/ACTG2/NDUFS1/SAMM50/CD2AP/HNRNPH1/CHCHD3/RPA1/INF2/SPART/WASF2
PEX11B	0.837667	1.33941	0.0429733	3071	tags=23%, list=6%, signal=21%	RPA1/RUFY1/NDUFS2/NDUFA10/ANP32E/HNRNPM/SAMM50/ACTN4/PPM1F/LRPPRC/DHX9/STRAP/ACTA1/CD2AP/TNKS1BP1/AAAS/ACTA2/ARMC6/DBN1
OFD1	0.872607	1.33939	0.0162074	1642	tags=13%, list=3%, signal=13%	HNRNPA3/HNRNPH1/SART3/SMPD4/CD2AP/HNRNPU/SAFB2/DHX9/FANCI/SLC7A11/CHCHD3
CSE1L	0.89268	1.33936	0.0114504	880	tags=21%, list=2%, signal=21%	HNRNPU/HNRNPA3/SMPD4/DHX9/LRPPRC/FANCI/TARDBP/HNRNPM/CD2AP/AAAS/ABI2/PRC1/RPA1/BOP1/GCN1/SLC3A2/ACTN4/WASF2
ZSWIM5	0.804846	1.33934	0.0335731	3530	tags=25%, list=6%, signal=23%	TARDBP/ZHX2/SLC2A1/GCN1/PRDX1/CD2AP/CAPZB/GTF2I/PCBP2/SLC7A11/SART3/AAAS/LRPPRC/HNRNPA3/NCKAP1/OXSM/BOP1/SAMM50/ARMC6/IPO4/MYL6
AGBL5	0.854532	1.33925	0.0339113	1183	tags=14%, list=2%, signal=14%	AAAS/SMPD4/NCKAP1/ANP32E/SART3/HNRNPA3/LRPPRC/HNRNPU/CHCHD3/PCBP2/PRDX1/HNRNPM
LMBR1	0.871655	1.33924	0.0354286	1839	tags=14%, list=3%, signal=14%	GTF2I/CNOT1/IPO7/NCKAP1/CHCHD3/LRPPRC/STRAP/GCN1/CYFIP1/UBASH3B/SAFB2/INF2
TMEM102	0.779263	1.33923	0.0414634	3670	tags=18%, list=7%, signal=17%	INF2/IQGAP1/DSTN/CYFIP1/ACTC1/PML/UBASH3B/SAMM50/NDUFS1/MYL6/PPM1F/FLNB/OXSM/HNRNPU/LRPPRC
SSB	0.901617	1.33919	0.0229923	2216	tags=21%, list=4%, signal=21%	HNRNPA3/HNRNPU/SMPD4/HNRNPM/DHX9/CAPZB/GTF2I/TARDBP/SQSTM1/LRPPRC/DBN1/ABI2/CD2AP/ACTN4/RRP1/ACTB/PPM1F/ANP32E
CLEC4O	0.949912	1.33916	0.0155324	1281	tags=5%, list=2%, signal=5%	MRPS17/AAAS/SAMM50/CNOT1
SRSF3	0.912062	1.33911	0.00558071	1096	tags=19%, list=2%, signal=19%	HNRNPA3/DHX9/TARDBP/HNRNPM/AAAS/SMPD4/CD2AP/RPA1/HNRNPU/HNRNPH1/ABI2/FANCI/STRAP/PCBP2/ATXN10/ARMC6
GET3	0.827979	1.33909	0.0424028	1980	tags=18%, list=4%, signal=17%	RNH1/BRK1/RPN1/AAAS/NDUFS2/CAPZB/DHX9/PRDX1/HNRNPM/ANP32E/SAFB2/DSTN/NUBPL/RUFY1/HNRNPH1
TCAF1P1	0.883885	1.33909	0.0440636	2868	tags=18%, list=5%, signal=17%	GTF2I/CNOT1/NDUFS1/IPO7/MYH10/CHD4/SPART/ACTBL2/FLNB/ACTA1/HNRNPM/BOP1/TLN1/EPAS1/MYH9
AL158212.3	0.851445	1.33908	0.037851	2409	tags=18%, list=4%, signal=17%	IPO7/CAPZB/DHX9/WASF2/SMPD4/DBN1/HNRNPA3/GCN1/HNRNPU/PPM1F/PDLIM1/STRAP/TLN1/ANP32E/NLN
SRSF9	0.914281	1.33886	0.00915465	2205	tags=27%, list=4%, signal=26%	SART3/DHX9/GCN1/HNRNPU/HNRNPA3/HNRNPM/FANCI/MYH9/CNOT1/ATXN10/BRK1/CHCHD3/STRAP/FLNA/PCBP2/ACTN4/RAC1/RRP1/AAAS/TARDBP/RPN1/SQSTM1/SAFB2
DVL3	0.927356	1.33886	0.00102151	1564	tags=21%, list=3%, signal=21%	SMPD4/SART3/HNRNPA3/DHX9/HNRNPU/MYH9/ACTN4/WASF2/RPA1/ANP32E/CHCHD3/GYS1/TRIP6/HNRNPH1/IPO7/IQGAP1/GCN1/SAFB2
TTC26	0.865762	1.33883	0.0263271	3106	tags=26%, list=6%, signal=25%	DHX9/FANCI/SART3/SMPD4/CHCHD3/CAPZB/WASF2/NCKAP1/TARDBP/CYFIP1/SLC2A1/ABI2/NUBPL/ANP32E/CHD4/STRAP/FLNA/SLC7A11/PRDX1/ACTC1/ACTA1/OXSM
TARS1	0.803356	1.33876	0.0477327	1618	tags=19%, list=3%, signal=19%	NSUN2/HNRNPA3/HNRNPU/STRAP/DHX9/RAC1/TARDBP/SLC3A2/SART3/NDUFA11/SAFB2/RRP1/ACTB/CHCHD3/NLN/RNH1
RFC3	0.891186	1.33875	0.0167606	2984	tags=20%, list=5%, signal=19%	FANCI/SMPD4/DHX9/HNRNPA3/RPA1/PRC1/AAAS/WASF2/STRAP/LRPPRC/SAFB2/GTF2I/SART3/RNH1/MYH10/NDUFA10/GYS1
AC026469.1	0.847792	1.33873	0.0417867	399	tags=5%, list=1%, signal=5%	BOP1/HNRNPU/TRIP6/SLC3A2
GTF2H2C	0.845113	1.33872	0.0318021	1513	tags=15%, list=3%, signal=15%	DHX9/LRPPRC/SMPD4/ATXN10/IPO7/GTF2I/HNRNPU/MYH9/GCN1/SART3/NSUN2/CHD4/MRPS17
RAPGEF5	0.867019	1.3387	0.0116674	1379	tags=12%, list=3%, signal=12%	CYFIP1/MYH9/EPAS1/FLNA/IQGAP1/SPART/GTF2I/ACTA2/TLN1/SLC7A11
UXS1	0.873702	1.3387	0.00992466	2012	tags=19%, list=4%, signal=18%	SMPD4/ABI2/DHX9/HNRNPA3/HNRNPU/CD2AP/RUFY1/RPA1/HNRNPH1/BOP1/TLN1/BRK1/HNRNPM/FANCI/RAC1/PPM1F
CPSF4	0.854809	1.33869	0.0414269	2796	tags=20%, list=5%, signal=19%	RRP1/BRK1/TARDBP/SMPD4/RAC1/SART3/FANCI/TRIP6/AAAS/IPO4/MRPS17/EPAS1/PCBP2/SLC3A2/CHCHD3/RNH1/INF2
RIPK2	0.8479	1.33855	0.0447427	3140	tags=15%, list=6%, signal=15%	BOP1/RAC1/ZHX2/SLC2A1/IQGAP1/UBASH3B/ACTB/HNRNPU/ACTG1/BRK1/CD2AP/PRC1/NDUFA11
TXNDC9	0.852561	1.33851	0.028932	5208	tags=33%, list=9%, signal=30%	HNRNPA3/HNRNPM/DBN1/HNRNPU/SQSTM1/NCKAP1/DSTN/DHX9/ATXN10/PML/TARDBP/LRPPRC/TLN1/RUFY1/NDUFS2/ACTC1/NSUN2/BRK1/STRAP/WASF2/PRDX1/NDUFA10/PRC1/PPM1F/ACTG1/IPO7/AAAS/IQGAP1
CNOT6	0.918613	1.33848	0.00171203	2016	tags=26%, list=4%, signal=25%	SART3/HNRNPH1/HNRNPU/HNRNPA3/SMPD4/ABI2/TARDBP/RUFY1/FANCI/DHX9/IPO7/SAFB2/IQGAP1/GTF2I/CD2AP/GYS1/CHD4/ARMC6/GCN1/UBASH3B/DBN1/PML
UBXN1	0.857849	1.33845	0.0447059	3962	tags=27%, list=7%, signal=25%	RRP1/PCBP2/BRK1/CHD4/GTF2I/MYL6/AAAS/FLNB/ATXN10/NDUFA11/CD2AP/HNRNPH1/MRPS17/RNH1/ACTN4/CAPZB/NDUFC1/NDUFS2/NDUFA10/MYH10/ACTA2/NSUN2/BOP1
AL121601.1	0.761183	1.33844	0.0493333	3857	tags=20%, list=7%, signal=19%	CHD4/EPAS1/NDUFA11/FANCI/TARDBP/HNRNPU/BOP1/PDLIM1/SQSTM1/WASF2/HNRNPH1/ACTG2/MYH10/LRPPRC/TRIP6/GYS1/FLNA
KIF2A	0.915257	1.33842	0.00563792	2026	tags=31%, list=4%, signal=30%	HNRNPM/DHX9/SART3/NCKAP1/HNRNPU/FANCI/HNRNPH1/SMPD4/STRAP/IQGAP1/HNRNPA3/CAPZB/RAC1/RPA1/ABI2/ANP32E/SLC2A1/WASF2/FLNA/GYS1/NSUN2/ACTB/PML/ACTG1/LRPPRC/CD2AP
AP000866.2	0.851833	1.33835	0.0219137	2017	tags=13%, list=4%, signal=13%	ACTG1/ACTN4/FLNA/CAPZB/GCN1/STRAP/SAFB2/TARDBP/TNKS1BP1/MYH9/ANP32E
AC009220.2	0.845126	1.33833	0.0479452	1052	tags=8%, list=2%, signal=8%	PRC1/FANCI/LRPPRC/CHCHD3/ACTN4/CYFIP1/PML
STXBP4	0.885326	1.33828	0.0126801	3170	tags=25%, list=6%, signal=24%	ABI2/SMPD4/HNRNPU/DHX9/SART3/HNRNPA3/RPA1/DBN1/HNRNPM/CD2AP/PCBP2/ACTG1/FLNA/CHCHD3/NSUN2/SLC2A1/NUBPL/STRAP/ATXN10/NDUFA10/GCN1
POLR3F	0.865555	1.33826	0.0190676	2269	tags=24%, list=4%, signal=23%	HNRNPM/HNRNPA3/SMPD4/FANCI/TARDBP/RPA1/GCN1/ABI2/SART3/AAAS/HNRNPH1/HNRNPU/DHX9/ACTN4/MYH9/DSTN/ACTA2/PRDX1/PCBP2/STRAP
AL035587.1	0.793521	1.33825	0.0435308	2118	tags=15%, list=4%, signal=15%	HNRNPH1/HNRNPA3/FANCI/ACTN4/RPA1/AAAS/HNRNPU/NSUN2/CYFIP1/CAPZB/SLC7A11/ANP32E/RUFY1
EIF2B5	0.869788	1.3382	0.0144329	2961	tags=26%, list=5%, signal=25%	AAAS/PCBP2/FANCI/HNRNPM/BRK1/TARDBP/SART3/HNRNPA3/MYL6/HNRNPU/ACTB/RRP1/ARMC6/CHCHD3/SAMM50/GCN1/DSTN/RUFY1/GTF2I/STRAP/ACTA1/OXSM
GALK2	0.840209	1.3382	0.0244226	1434	tags=13%, list=3%, signal=13%	CNOT1/SMPD4/NDUFS1/GTF2I/CYFIP1/IPO7/CHCHD3/NLN/NCKAP1/DHX9/ARMC6
SLC35E3	0.868375	1.33819	0.00966014	2528	tags=27%, list=5%, signal=26%	HNRNPU/SMPD4/HNRNPA3/FANCI/SART3/WASF2/DHX9/FLNB/ATXN10/NCKAP1/TNKS1BP1/BRK1/AAAS/SPART/INF2/MYH9/MRPS17/NDUFS1/NUBPL/GCN1/RNH1/EPAS1/ZHX2
GTF2H3	0.899867	1.33815	0.00593036	1999	tags=29%, list=4%, signal=28%	DHX9/SART3/HNRNPA3/HNRNPU/HNRNPM/CNOT1/SMPD4/NDUFA11/NCKAP1/WASF2/CYFIP1/FANCI/RPN1/RAC1/TLN1/FLNB/PCBP2/NDUFA10/UBASH3B/ACTB/IQGAP1/LRPPRC/TARDBP/ABI2
BLM	0.918596	1.33815	0.0327569	1316	tags=14%, list=2%, signal=14%	FANCI/HNRNPA3/HNRNPU/PRC1/SMPD4/ABI2/RPA1/DHX9/GCN1/LRPPRC/ACTG1/NUBPL
OBP2A	0.905824	1.33813	0.022987	3358	tags=15%, list=6%, signal=15%	CNOT1/CAPZB/BRK1/ANP32E/UBASH3B/NDUFC1/CHCHD3/ACTB/INF2/SAMM50/ACTA2/TLN1/TRIP6
UIMC1	0.890662	1.33813	0.00957171	2119	tags=23%, list=4%, signal=22%	HNRNPH1/SMPD4/SART3/DHX9/AAAS/HNRNPM/HNRNPA3/RUFY1/IPO7/CHCHD3/NCKAP1/PCBP2/ABI2/HNRNPU/SAFB2/ACTG1/GCN1/DBN1/TNKS1BP1
ZNF121	0.849578	1.3381	0.0384615	2463	tags=20%, list=4%, signal=19%	SAFB2/HNRNPH1/HNRNPU/PCBP2/ABI2/HNRNPA3/CD2AP/PRDX1/SLC2A3/CHCHD3/SMPD4/NDUFS2/TLN1/NSUN2/RAC1/PML/PDLIM1
AC004771.2	0.820227	1.3381	0.0416667	1517	tags=12%, list=3%, signal=12%	IQGAP1/EPAS1/CYFIP1/FLNA/TLN1/OXSM/MYL6/RAC1/ACTN4/UBASH3B
DUSP7	0.872396	1.33797	0.00724351	2930	tags=25%, list=5%, signal=24%	DHX9/NCKAP1/SART3/GYS1/FLNA/WASF2/IQGAP1/STRAP/HNRNPM/SMPD4/GCN1/ACTN4/DBN1/SLC2A3/ACTB/ACTA2/SLC3A2/CYFIP1/NSUN2/FLNB/CAPZB
ZNF602P	0.77186	1.33794	0.04	4636	tags=13%, list=8%, signal=12%	TARDBP/BOP1/PRDX1/PRC1/ACTA1/BRK1/INF2/RUFY1/ACTA2/ANP32E/IPO7
ZNF674-AS1	0.815547	1.3377	0.037296	2481	tags=14%, list=5%, signal=14%	HNRNPA3/DHX9/HNRNPH1/SMPD4/NDUFS1/ARMC6/SART3/RRP1/HNRNPM/SAFB2/ABI2/RPA1
RPL37P6	0.875984	1.33769	0.0375427	3509	tags=19%, list=6%, signal=18%	CHD4/NDUFA11/MYL6/CYFIP1/GTF2I/GCN1/CNOT1/BRK1/RPA1/ACTG2/ACTA1/BOP1/ACTB/IPO7/NDUFA10/SAMM50
GLA	0.804247	1.33767	0.0488677	1916	tags=19%, list=3%, signal=18%	SLC2A1/RAC1/WASF2/PRDX1/SLC3A2/TARDBP/NLN/STRAP/SPART/BOP1/UBASH3B/NSUN2/HNRNPU/ANP32E/SQSTM1/RRP1
CAPN1	0.84837	1.33767	0.0237827	2715	tags=19%, list=5%, signal=18%	SART3/SMPD4/CYFIP1/ACTN4/MYH9/NCKAP1/FLNA/CHCHD3/FANCI/TLN1/BRK1/IPO7/RPA1/RNH1/TNKS1BP1/ABI2
LIMS1	0.918946	1.33763	0.002567	1625	tags=15%, list=3%, signal=15%	NCKAP1/DHX9/SART3/CD2AP/CNOT1/CAPZB/LRPPRC/SMPD4/MYH9/TLN1/SLC7A11/FLNB/FANCI
AC012467.2	0.841648	1.33756	0.0209827	1695	tags=13%, list=3%, signal=13%	ABI2/HNRNPH1/SMPD4/SART3/RPA1/HNRNPA3/PML/TARDBP/RPN1/WASF2/BRK1
MGAT5	0.847035	1.33752	0.0231693	2970	tags=24%, list=5%, signal=23%	PML/ABI2/HNRNPA3/WASF2/SART3/IQGAP1/UBASH3B/CYFIP1/INF2/FANCI/DSTN/FLNA/MYH9/NDUFC1/SLC2A3/ACTN4/SQSTM1/GYS1/ACTB/RUFY1
ADM	0.785396	1.33748	0.0421836	2774	tags=18%, list=5%, signal=17%	SLC2A1/SLC2A3/SLC7A11/CAPZB/ACTB/CHCHD3/SLC3A2/PCBP2/BOP1/NDUFS1/NDUFS2/WASF2/CHD4/NCKAP1/OXSM
ZNF764	0.821266	1.33747	0.0386007	4476	tags=26%, list=8%, signal=24%	SMPD4/DHX9/HNRNPM/ANP32E/CD2AP/GYS1/ATXN10/ACTN4/IPO7/HNRNPA3/RAC1/ACTG2/SART3/RNH1/SLC2A3/CNOT1/HNRNPH1/FLNA/ARMC6/ACTB/TRIP6/NDUFC1
AL049634.1	0.905995	1.33744	0.0272426	3121	tags=13%, list=6%, signal=12%	IQGAP1/FANCI/CD2AP/NDUFS2/ACTA1/RUFY1/ACTC1/CYFIP1/CHD4/AAAS/HNRNPM
DAZAP1	0.914407	1.33742	0.00269094	1052	tags=18%, list=2%, signal=18%	HNRNPM/HNRNPA3/HNRNPU/GCN1/TARDBP/SART3/FANCI/SAFB2/PCBP2/HNRNPH1/PRC1/DHX9/ACTN4/GYS1/SMPD4
PPP1R15A	0.797022	1.3374	0.0472727	5149	tags=31%, list=9%, signal=28%	SLC2A3/IQGAP1/FLNA/ACTB/ACTG1/AAAS/NSUN2/PML/TLN1/RNH1/CD2AP/CAPZB/SLC3A2/SLC7A11/MYH10/NDUFC1/ARMC6/UBASH3B/CYFIP1/RAC1/NUBPL/SLC2A1/PDLIM1/NDUFA10/BOP1/INF2
AP3B1	0.904579	1.33738	0.00753127	1607	tags=26%, list=3%, signal=25%	DHX9/NSUN2/HNRNPU/NCKAP1/LRPPRC/IPO7/ACTN4/RAC1/TARDBP/RPA1/NLN/SQSTM1/WASF2/CYFIP1/CHCHD3/RUFY1/FLNA/PRDX1/RNH1/TLN1/HNRNPM/CAPZB
BICD1	0.900572	1.33726	0.00383332	1456	tags=18%, list=3%, signal=17%	ABI2/GCN1/NCKAP1/HNRNPU/RPA1/GYS1/SLC2A1/SLC7A11/CHCHD3/STRAP/DBN1/IQGAP1/TARDBP/ACTB/INF2
TARDBP	0.904423	1.33726	0.00205318	2198	tags=28%, list=4%, signal=27%	HNRNPU/HNRNPM/ABI2/FANCI/HNRNPA3/RAC1/RRP1/SART3/SMPD4/PRC1/GYS1/DHX9/ANP32E/PCBP2/HNRNPH1/AAAS/SLC2A1/CHD4/GCN1/SAFB2/BRK1/IPO4/ACTB
NAP1L1	0.897131	1.33722	0.00247298	2034	tags=20%, list=4%, signal=20%	DHX9/SART3/TARDBP/PCBP2/RPA1/LRPPRC/ABI2/SMPD4/UBASH3B/ACTG1/HNRNPA3/RRP1/SLC2A1/ACTN4/SAFB2/HNRNPM/STRAP
PPP1R21	0.869193	1.33719	0.010885	2346	tags=14%, list=4%, signal=14%	NCKAP1/IPO7/LRPPRC/ACTN4/RPA1/HNRNPA3/CAPZB/HNRNPU/NDUFA11/TLN1/MYH10/ACTG2
NOMO2	0.901396	1.33718	0.0101415	2522	tags=24%, list=5%, signal=23%	CNOT1/GTF2I/NCKAP1/MYH9/GCN1/ACTN4/DHX9/LRPPRC/WASF2/CYFIP1/RPA1/FLNB/SLC3A2/NDUFC1/TLN1/ACTG1/RAC1/CHD4/ACTB/ACTC1
USP22	0.89083	1.33715	0.0139074	1186	tags=17%, list=2%, signal=16%	GCN1/DHX9/CNOT1/GTF2I/MYH10/SART3/SMPD4/IPO7/LRPPRC/WASF2/CD2AP/NCKAP1/ATXN10/NDUFS1
ADGRE5	0.844103	1.33709	0.0314597	1877	tags=14%, list=3%, signal=14%	UBASH3B/FLNA/BOP1/IQGAP1/SQSTM1/NCKAP1/ACTG1/NLN/DSTN/PML/SLC2A1/SPART
RPIA	0.88152	1.33707	0.0163986	2178	tags=21%, list=4%, signal=21%	HNRNPA3/HNRNPU/HNRNPM/ACTG1/TARDBP/RPA1/ANP32E/CD2AP/ACTB/BRK1/NDUFS1/PML/PCBP2/SMPD4/FANCI/NDUFA10/IPO4/ARMC6
EIF4HP1	0.864751	1.33702	0.0472813	1779	tags=11%, list=3%, signal=10%	CNOT1/GTF2I/DBN1/MYH10/SLC2A3/CYFIP1/LRPPRC/NCKAP1/RRP1
DNAJC17	0.817907	1.33701	0.0470723	3140	tags=20%, list=6%, signal=19%	MYL6/CHD4/RRP1/GTF2I/NDUFA11/INF2/PRC1/DSTN/EPAS1/RNH1/RUFY1/PML/CNOT1/HNRNPA3/IPO4/HNRNPH1/MRPS17
TLK2	0.891487	1.33698	0.0177177	2073	tags=20%, list=4%, signal=20%	HNRNPH1/SMPD4/TARDBP/HNRNPU/HNRNPA3/DHX9/SART3/CD2AP/ABI2/SAFB2/DSTN/PCBP2/STRAP/ACTG1/RAC1/IPO7/NLN
RGS14	0.797305	1.33698	0.0462725	2863	tags=18%, list=5%, signal=17%	SQSTM1/NLN/BOP1/SLC7A11/ACTN4/CAPZB/ZHX2/MYH10/PDLIM1/HNRNPU/NDUFA10/SLC2A3/RUFY1/EPAS1/TLN1
SNRPB2	0.861407	1.33696	0.0273206	2775	tags=18%, list=5%, signal=17%	TARDBP/HNRNPA3/AAAS/FANCI/DSTN/RAC1/HNRNPM/CD2AP/SMPD4/PCBP2/GYS1/ACTBL2/BRK1/NSUN2/HNRNPH1
AL596087.1	0.836985	1.33696	0.0303398	3098	tags=26%, list=6%, signal=25%	CNOT1/HNRNPM/DHX9/ACTN4/GTF2I/CYFIP1/MYH9/IPO7/BOP1/LRPPRC/NCKAP1/EPAS1/PPM1F/PML/PRDX1/FLNA/MRPS17/TNKS1BP1/PDLIM1/ATXN10/SMPD4/ABI2
NBN	0.866218	1.33695	0.0473506	2558	tags=31%, list=5%, signal=30%	SART3/IPO7/CYFIP1/CNOT1/NCKAP1/DHX9/UBASH3B/GCN1/NLN/SQSTM1/IQGAP1/ACTN4/TLN1/ZHX2/SLC3A2/EPAS1/SLC2A3/ARMC6/ACTBL2/CHD4/SLC2A1/MYH10/MYL6/BOP1/RNH1/CHCHD3
NEMP2	0.833066	1.33692	0.043849	2813	tags=18%, list=5%, signal=17%	HNRNPA3/HNRNPU/FANCI/NCKAP1/EPAS1/SMPD4/RPN1/STRAP/RPA1/BRK1/NDUFA10/MYH9/CYFIP1/AAAS/SLC2A1
TMEM192	0.840772	1.3368	0.0301676	3258	tags=17%, list=6%, signal=16%	CNOT1/GTF2I/NDUFS1/UBASH3B/NUBPL/NDUFC1/ACTG2/DBN1/FLNB/CHD4/CAPZB/NDUFS2/GCN1/BRK1
TGIF1	0.782927	1.33672	0.0441527	3844	tags=18%, list=7%, signal=17%	HNRNPU/ZHX2/ATXN10/FLNB/RPN1/CAPZB/ANP32E/SLC3A2/NUBPL/IPO4/ACTB/SLC7A11/CNOT1/PDLIM1/BOP1
RHEB	0.848103	1.33667	0.0296804	1853	tags=18%, list=3%, signal=17%	CHCHD3/DHX9/STRAP/CYFIP1/HNRNPU/RPN1/WASF2/HNRNPM/CNOT1/NSUN2/OXSM/TLN1/PCBP2/MYH9/AAAS
SET	0.91291	1.33667	0.0113142	1803	tags=25%, list=3%, signal=24%	HNRNPA3/HNRNPU/DHX9/SART3/GCN1/HNRNPM/ZHX2/ABI2/FANCI/BRK1/SMPD4/WASF2/DBN1/RUFY1/STRAP/HNRNPH1/RAC1/RNH1/ACTG2/TLN1/TARDBP
HCG15	0.807775	1.33665	0.0492424	2277	tags=13%, list=4%, signal=13%	HNRNPH1/NSUN2/IPO7/HNRNPA3/ABI2/SPART/SART3/RAC1/OXSM/ACTA1/NDUFS1
NCK2	0.867532	1.33663	0.0179691	3955	tags=26%, list=7%, signal=24%	DBN1/ABI2/ACTG1/SAFB2/SART3/MYH10/SQSTM1/ATXN10/LRPPRC/NDUFC1/SMPD4/SPART/DHX9/SAMM50/RPA1/NDUFS1/RNH1/HNRNPU/TNKS1BP1/ACTN4/CYFIP1/ANP32E
SELENOF	0.831044	1.33662	0.0487805	2349	tags=17%, list=4%, signal=16%	HNRNPM/WASF2/TARDBP/PRDX1/DHX9/RNH1/GCN1/NLN/ATXN10/RPN1/CYFIP1/CHCHD3/SLC2A1/ACTBL2
PES1	0.872473	1.33659	0.0310345	2519	tags=30%, list=5%, signal=28%	BRK1/RRP1/PPM1F/HNRNPM/ATXN10/RUFY1/ZHX2/ACTB/DBN1/BOP1/PCBP2/CNOT1/TARDBP/RNH1/HNRNPH1/EPAS1/INF2/HNRNPU/GCN1/NDUFA10/OXSM/CHD4/AAAS/STRAP/LRPPRC
AC073370.1	0.851732	1.33658	0.035014	2964	tags=11%, list=5%, signal=10%	ACTB/FANCI/PML/UBASH3B/RRP1/SLC2A1/BOP1/SLC7A11/DBN1
TSR1	0.890165	1.33654	0.034141	2509	tags=27%, list=5%, signal=26%	RPA1/DHX9/HNRNPU/IPO7/SMPD4/CYFIP1/GTF2I/NCKAP1/FLNA/TLN1/SQSTM1/HNRNPM/NDUFS1/MYH10/UBASH3B/IQGAP1/CHCHD3/OXSM/SLC2A3/NUBPL/NDUFS2/RRP1/HNRNPH1
CASP8	0.863901	1.33652	0.0159484	1320	tags=18%, list=2%, signal=17%	NCKAP1/SMPD4/SQSTM1/WASF2/HNRNPA3/ABI2/SART3/DHX9/NSUN2/CNOT1/CYFIP1/NDUFA10/IPO7/FANCI/GTF2I
METTL17	0.87888	1.33646	0.0269252	1773	tags=20%, list=3%, signal=20%	SART3/HNRNPH1/SMPD4/AAAS/ABI2/HNRNPM/MYH9/ACTN4/SAFB2/DHX9/GCN1/RPA1/HNRNPA3/INF2/ANP32E/ZHX2/SLC3A2
RBM28	0.895671	1.3364	0.0138407	1622	tags=23%, list=3%, signal=22%	SART3/SMPD4/CHCHD3/HNRNPA3/GCN1/HNRNPU/TARDBP/RUFY1/DHX9/ANP32E/WASF2/ATXN10/LRPPRC/RRP1/AAAS/HNRNPH1/STRAP/RPN1/DBN1
KLF7	0.859472	1.33632	0.00953712	2734	tags=15%, list=5%, signal=15%	IQGAP1/SPART/EPAS1/ABI2/FLNA/ACTA2/NCKAP1/SLC2A3/SMPD4/FLNB/ATXN10/ACTB/GTF2I
KBTBD2	0.896157	1.33624	0.00763757	1495	tags=21%, list=3%, signal=21%	DHX9/HNRNPU/CD2AP/SART3/NCKAP1/RAC1/ABI2/TARDBP/TLN1/SMPD4/NSUN2/LRPPRC/IQGAP1/ACTB/CHCHD3/FLNB/PRC1/RPA1
YWHAB	0.90299	1.33621	0.00919068	2843	tags=33%, list=5%, signal=32%	HNRNPM/CYFIP1/DHX9/SART3/DSTN/FANCI/HNRNPU/TARDBP/NCKAP1/RAC1/HNRNPA3/PML/IQGAP1/DBN1/STRAP/ATXN10/RNH1/CHCHD3/ACTG1/GYS1/MYH9/ACTB/GCN1/CAPZB/CD2AP/RPA1/UBASH3B/FLNA
G6PD	0.890684	1.33621	0.00520732	3327	tags=29%, list=6%, signal=27%	SLC2A1/CAPZB/UBASH3B/PCBP2/INF2/HNRNPM/SLC7A11/RUFY1/TARDBP/DBN1/NLN/SLC2A3/CHD4/SQSTM1/SLC3A2/PML/MRPS17/FLNB/ZHX2/HNRNPA3/PPM1F/NDUFS2/HNRNPU/RRP1
[truncated: 1,438 more rows]

## Sheet: Table S4
IncNodePurity (N=5490)
Gene	enrichmentScore	NES	pvalue	rank	leading_edge	core_enrichment
DPM1	0.9001	1.13337	0.0157707	2692	tags=19%, list=5%, signal=18%	SART3/FANCI/SMPD4/HNRNPM/HNRNPH1/AAAS/IQGAP1/MYH9/GYS1/NDUFS2/BRK1/ACTA2/NSUN2/ANP32E/PRC1/UBASH3B
C1orf112	0.938869	1.15357	0.00120574	2169	tags=20%, list=4%, signal=19%	HNRNPU/RPA1/SART3/ANP32E/DHX9/HNRNPM/AAAS/LRPPRC/FANCI/NUBPL/SMPD4/TLN1/MYH10/MYH9/GCN1/IPO7/RUFY1
NFYA	0.939259	1.14931	0.0169723	1138	tags=11%, list=2%, signal=11%	SMPD4/CD2AP/HNRNPU/DHX9/HNRNPA3/ANP32E/SART3/ZHX2/NCKAP1
NIPAL3	0.924619	1.14948	0.00286736	1695	tags=21%, list=3%, signal=21%	WASF2/UBASH3B/NCKAP1/HNRNPU/SART3/CYFIP1/CNOT1/DSTN/DHX9/GYS1/EPAS1/IQGAP1/CAPZB/GTF2I/PML/GCN1/TLN1/RPA1
LAS1L	0.906452	1.13664	0.0205769	2038	tags=24%, list=4%, signal=23%	FANCI/DHX9/HNRNPU/HNRNPM/PCBP2/TARDBP/STRAP/SART3/RPA1/PRDX1/GCN1/AAAS/CAPZB/PRC1/MYL6/CHD4/BOP1/RNH1/GYS1/SQSTM1
ANKIB1	0.944501	1.12207	0.02997	678	tags=7%, list=1%, signal=7%	IPO7/GTF2I/NCKAP1/CHCHD3/IQGAP1/SLC2A1
CD99	0.848913	1.11367	0.0172726	5062	tags=31%, list=9%, signal=28%	CAPZB/RPN1/PRDX1/HNRNPM/MYL6/TARDBP/HNRNPU/MYH9/SMPD4/CHCHD3/PCBP2/BRK1/NDUFA10/FANCI/RAC1/INF2/SAFB2/ZHX2/PDLIM1/SQSTM1/ACTBL2/STRAP/ACTG1/ACTC1/ABI2/SLC2A1
LASP1	0.916334	1.1349	0.030969	1409	tags=18%, list=3%, signal=17%	SART3/DHX9/SMPD4/ACTN4/MYH9/ATXN10/NCKAP1/GCN1/WASF2/INF2/HNRNPU/HNRNPM/SQSTM1/HNRNPA3/GTF2I
CYP26B1	0.903049	1.09387	0.027972	3380	tags=19%, list=6%, signal=18%	ABI2/HNRNPA3/GCN1/DBN1/IPO7/INF2/ACTC1/TARDBP/ACTG1/SAFB2/ATXN10/SMPD4/BOP1/TRIP6/ACTA2/DSTN
CASP10	0.886149	1.11927	0.02997	3425	tags=27%, list=6%, signal=26%	GYS1/IQGAP1/SMPD4/RPA1/WASF2/PML/MYH9/HNRNPA3/ACTN4/FLNB/PPM1F/EPAS1/SART3/BOP1/DHX9/FANCI/RUFY1/NCKAP1/ABI2/GCN1/NDUFA10/SLC3A2/TRIP6
RBM5	0.946051	1.15449	0.00591176	533	tags=10%, list=1%, signal=9%	HNRNPH1/DHX9/SMPD4/SART3/HNRNPA3/HNRNPU/SAFB2/ABI2
ARF5	0.902632	1.14694	0.0163715	2524	tags=23%, list=5%, signal=22%	HNRNPM/CHCHD3/TRIP6/RPN1/AAAS/HNRNPU/SAFB2/STRAP/FANCI/SLC7A11/ACTA2/RRP1/RNH1/ACTN4/BRK1/PDLIM1/WASF2/RAC1/MRPS17
FKBP4	0.916695	1.19037	0.00185002	1603	tags=29%, list=3%, signal=28%	STRAP/WASF2/DHX9/HNRNPU/HNRNPM/SMPD4/GCN1/ACTG1/PPM1F/BOP1/CYFIP1/HNRNPA3/LRPPRC/SAMM50/CNOT1/IQGAP1/ZHX2/CHCHD3/ATXN10/NDUFS2/SLC3A2/IPO4/NLN/BRK1
KDM1A	0.952009	1.16116	0.00305235	1070	tags=20%, list=2%, signal=20%	TARDBP/HNRNPM/CAPZB/WASF2/HNRNPU/SLC2A1/SART3/AAAS/BRK1/GYS1/PCBP2/RNH1/GCN1/RAC1/PML/CHCHD3/BOP1
HCCS	0.88881	1.12684	0.027972	2568	tags=25%, list=5%, signal=24%	HNRNPM/LRPPRC/TLN1/IPO7/DHX9/SLC2A1/OXSM/MYH10/CAPZB/RNH1/CHCHD3/PML/GCN1/PRDX1/NSUN2/SLC7A11/STRAP/CHD4/NDUFA10/ACTB/WASF2
DVL2	0.946747	1.16898	0.00142664	1303	tags=21%, list=2%, signal=21%	RPA1/AAAS/DHX9/HNRNPU/TARDBP/SMPD4/SART3/HNRNPM/HNRNPA3/MYH10/CNOT1/CD2AP/GYS1/ACTB/SAFB2/CAPZB/GCN1/RUFY1
SLC25A5	0.873293	1.12111	0.02997	2521	tags=20%, list=5%, signal=19%	CHCHD3/HNRNPM/DHX9/STRAP/ATXN10/ACTA2/BRK1/RNH1/CNOT1/NDUFS2/CYFIP1/RPA1/TLN1/RUFY1/ACTB/SPART/CAPZB
DHX33	0.928505	1.17633	0.00747334	1433	tags=19%, list=3%, signal=19%	RPA1/GTF2I/LRPPRC/DHX9/NCKAP1/MYH10/HNRNPH1/GCN1/HNRNPU/SART3/ACTN4/NDUFS1/NSUN2/TARDBP/CNOT1/ZHX2
THSD7A	0.906118	1.12667	0.00275637	2861	tags=19%, list=5%, signal=18%	EPAS1/IQGAP1/MYH10/FLNA/ABI2/TARDBP/HNRNPA3/PML/RUFY1/ACTA2/CYFIP1/STRAP/SQSTM1/CNOT1/ACTG1/SLC2A1
LIG3	0.941191	1.16652	0.00479635	2094	tags=30%, list=4%, signal=29%	DHX9/LRPPRC/SART3/HNRNPU/AAAS/CD2AP/FANCI/CNOT1/SMPD4/IPO4/RPA1/ATXN10/HNRNPM/CYFIP1/FLNB/ACTN4/GCN1/NUBPL/PRDX1/NLN/NSUN2/SLC3A2/HNRNPA3/BOP1/PPM1F
CIAPIN1	0.907822	1.14049	0.026973	3052	tags=27%, list=6%, signal=26%	HNRNPM/STRAP/CHCHD3/GYS1/SLC2A1/SART3/BRK1/RPA1/CNOT1/NDUFS2/ATXN10/SLC3A2/ACTN4/RNH1/CAPZB/NDUFA10/LRPPRC/ACTB/MYL6/CD2AP/UBASH3B/GCN1/ARMC6
FAM214B	0.909875	1.15305	0.00784661	2679	tags=24%, list=5%, signal=23%	GYS1/PML/TLN1/ACTB/RNH1/WASF2/DSTN/ACTBL2/SLC3A2/SART3/SLC2A3/SLC2A1/NDUFC1/PCBP2/PPM1F/HNRNPA3/HNRNPM/SPART/UBASH3B/NDUFS2
MSL3	0.899631	1.10873	0.047952	2676	tags=20%, list=5%, signal=19%	ABI2/FLNA/SART3/HNRNPM/FANCI/IQGAP1/UBASH3B/STRAP/SPART/AAAS/CYFIP1/GCN1/HNRNPH1/ACTB/WASF2/ANP32E/LRPPRC
GCFC2	0.873785	1.11484	0.027972	1719	tags=15%, list=3%, signal=15%	HNRNPU/ZHX2/LRPPRC/NUBPL/DHX9/RPA1/IPO7/HNRNPH1/NCKAP1/BOP1/PCBP2/SQSTM1/SART3
ZNF195	0.925225	1.12491	0.030969	2210	tags=13%, list=4%, signal=13%	HNRNPU/SMPD4/HNRNPA3/SART3/IPO7/SAFB2/LRPPRC/NSUN2/ABI2/PPM1F/RAC1
PDK2	0.888065	1.11341	0.026973	4411	tags=23%, list=8%, signal=21%	SMPD4/CNOT1/NDUFS1/MYH9/DHX9/GTF2I/SQSTM1/GYS1/BOP1/ACTA2/RAC1/HNRNPM/PRDX1/CHCHD3/ACTN4/ACTG1/SPART/DSTN/NDUFA10
ITGA3	0.939206	1.09782	0.03996	2267	tags=13%, list=4%, signal=13%	IQGAP1/FLNA/UBASH3B/PML/ACTA2/ACTB/SPART/ACTN4/ACTC1/NDUFC1/GYS1
REX1BD	0.874272	1.13248	0.0106863	4480	tags=23%, list=8%, signal=21%	MYL6/RNH1/NDUFA11/RRP1/EPAS1/NDUFS1/ARMC6/SMPD4/FLNB/CAPZB/NDUFC1/CHD4/ACTC1/TRIP6/PDLIM1/CD2AP/IPO4/NLN/ACTB
TMEM132A	0.939674	1.11587	0.0108357	1391	tags=13%, list=3%, signal=13%	DBN1/GYS1/ABI2/FLNA/ACTG1/DSTN/PDLIM1/RNH1/UBASH3B/HNRNPM/AAAS
AP2B1	0.89534	1.11793	0.034965	2913	tags=21%, list=5%, signal=20%	HNRNPU/MYH9/IPO7/NCKAP1/CD2AP/DHX9/NUBPL/SMPD4/TLN1/SART3/FLNA/ABI2/SAMM50/GTF2I/LRPPRC/NSUN2/ATXN10/DBN1
TNFRSF12A	0.873814	1.13111	0.00553996	2753	tags=23%, list=5%, signal=22%	ACTB/RNH1/PDLIM1/DBN1/UBASH3B/RAC1/PML/RUFY1/RPA1/TNKS1BP1/SLC3A2/ACTG1/ZHX2/CYFIP1/SQSTM1/TLN1/MYL6/NDUFS2/FLNA
MAP3K9	0.902582	1.12399	0.0271854	2535	tags=24%, list=5%, signal=23%	HNRNPH1/SART3/GCN1/DHX9/HNRNPA3/RPA1/HNRNPU/SMPD4/INF2/SLC2A1/DSTN/HNRNPM/TARDBP/WASF2/ANP32E/RPN1/CAPZB/NSUN2/TLN1/PML
RALA	0.937472	1.15692	0.00501943	1673	tags=27%, list=3%, signal=27%	RAC1/SMPD4/GCN1/TARDBP/ACTB/FANCI/DHX9/HNRNPM/CAPZB/AAAS/STRAP/DBN1/HNRNPU/CD2AP/RPN1/PCBP2/BRK1/ATXN10/TLN1/CHCHD3/BOP1/GYS1/SLC2A3
ALDH3B1	0.91525	1.14852	0.00382967	1206	tags=15%, list=2%, signal=15%	PML/CD2AP/RAC1/IQGAP1/FANCI/SART3/HNRNPU/DBN1/ANP32E/UBASH3B/DSTN/SAFB2/CAPZB
CCL26	0.898832	1.08361	0.037962	2149	tags=10%, list=4%, signal=9%	ACTB/PML/WASF2/SLC2A3/BRK1/RUFY1/NDUFS2/CHD4
DBF4	0.942512	1.14651	0.0202765	1169	tags=25%, list=2%, signal=25%	FANCI/SART3/HNRNPM/ABI2/DHX9/HNRNPU/TARDBP/NCKAP1/RPA1/HNRNPA3/ACTB/SMPD4/SLC2A1/ANP32E/IPO7/RAC1/LRPPRC/GCN1/RRP1/PRC1/WASF2
COX10	0.922821	1.1909	0.000828876	2553	tags=25%, list=5%, signal=24%	LRPPRC/GYS1/STRAP/RPA1/OXSM/MYH10/DHX9/NDUFS1/NDUFA10/GCN1/WASF2/SAMM50/ABI2/SAFB2/AAAS/ATXN10/TNKS1BP1/SPART/HNRNPU/TRIP6/CHCHD3
GTF2IRD1	0.892853	1.12849	0.025974	3305	tags=31%, list=6%, signal=29%	SMPD4/RPA1/SART3/ACTN4/HNRNPU/HNRNPH1/CD2AP/CHCHD3/IPO7/SAFB2/STRAP/NDUFS1/CAPZB/FANCI/SPART/TNKS1BP1/CYFIP1/ARMC6/RPN1/SLC3A2/MYH9/GYS1/PRC1/ACTA1/DBN1/GCN1
PAF1	0.885616	1.12312	0.040959	3788	tags=27%, list=7%, signal=26%	RRP1/MYL6/AAAS/SAFB2/TARDBP/BRK1/HNRNPM/RNH1/TNKS1BP1/FANCI/GYS1/RPA1/CHCHD3/ACTG2/GCN1/PDLIM1/NDUFS2/TRIP6/RUFY1/INF2/ACTN4/RPN1/IPO7
ELAC2	0.903781	1.16044	0.00859389	1595	tags=25%, list=3%, signal=24%	RPA1/ATXN10/MYH10/HNRNPM/DHX9/LRPPRC/OXSM/ACTN4/HNRNPU/GCN1/NDUFA10/SAMM50/CD2AP/TNKS1BP1/AAAS/PPM1F/NDUFS2/STRAP/CYFIP1/RRP1/PRC1
PNPLA4	0.835328	1.09266	0.033966	5147	tags=29%, list=9%, signal=26%	CNOT1/NUBPL/NDUFS1/TNKS1BP1/RAC1/SLC2A1/PML/NDUFA10/GTF2I/MYH10/CHCHD3/NDUFA11/NLN/CHD4/ANP32E/MRPS17/EPAS1/HNRNPA3/CAPZB/ACTA1/SAMM50/RRP1/TRIP6/WASF2
CDKL3	0.872293	1.11315	0.0250827	1606	tags=10%, list=3%, signal=9%	HNRNPH1/ABI2/CD2AP/TARDBP/RUFY1/TLN1/PRC1/NDUFS1
MARK4	0.885457	1.12319	0.033966	2137	tags=20%, list=4%, signal=19%	SMPD4/SAFB2/GYS1/DHX9/HNRNPA3/ACTN4/ATXN10/HNRNPU/RUFY1/TLN1/RPA1/SART3/WASF2/FANCI/SLC2A1/AAAS/LRPPRC
PROM1	0.932287	1.06225	0.043956	2190	tags=13%, list=4%, signal=13%	DBN1/UBASH3B/IQGAP1/ABI2/GYS1/SLC2A1/CD2AP/PML/BOP1/ACTG1/CNOT1
CCDC124	0.90774	1.13859	0.0323009	2306	tags=20%, list=4%, signal=19%	RRP1/BRK1/BOP1/CHD4/RAC1/MYL6/DBN1/GTF2I/ARMC6/RNH1/NDUFA10/IPO7/HNRNPM/ACTA1/NDUFC1/AAAS/TNKS1BP1
PAFAH1B1	0.928647	1.15073	0.0202765	2577	tags=26%, list=5%, signal=25%	RPA1/CYFIP1/DHX9/IQGAP1/NCKAP1/STRAP/CD2AP/HNRNPM/TLN1/EPAS1/ACTB/NDUFS2/DBN1/DSTN/ACTN4/ZHX2/FLNA/SLC2A1/NDUFS1/OXSM/INF2/UBASH3B
DNAH9	0.974891	1.07374	0.0292882	19	tags=2%, list=0%, signal=2%	GYS1/TNKS1BP1
KIAA0100	0.903792	1.14602	0.0178734	3202	tags=26%, list=6%, signal=25%	WASF2/PPM1F/CYFIP1/GCN1/SMPD4/HNRNPM/FANCI/ATXN10/RRP1/LRPPRC/RPA1/HNRNPH1/IPO7/TNKS1BP1/RAC1/EPAS1/BRK1/FLNB/UBASH3B/TLN1/BOP1/NLN
RHBDF1	0.896009	1.13813	0.00993898	1846	tags=18%, list=3%, signal=17%	FLNA/DBN1/MYH9/NCKAP1/ACTB/DSTN/PPM1F/CYFIP1/UBASH3B/TRIP6/SLC7A11/RAC1/NDUFA11/IQGAP1/NDUFS2
CRAMP1	0.923082	1.14591	0.0100884	1954	tags=20%, list=4%, signal=20%	DHX9/SMPD4/WASF2/HNRNPU/RPA1/ACTN4/FLNA/PPM1F/NDUFA10/PRC1/MYH9/IPO7/HNRNPH1/HNRNPA3/PML/NCKAP1/CNOT1
TEAD3	0.914812	1.13168	0.031968	1490	tags=12%, list=3%, signal=12%	SMPD4/DHX9/SAFB2/CD2AP/HNRNPU/HNRNPA3/ABI2/ACTN4/MYH9/NDUFA11
JARID2	0.949459	1.16431	0.00494507	645	tags=13%, list=1%, signal=13%	CD2AP/DHX9/RPA1/HNRNPU/SART3/SMPD4/HNRNPM/ATXN10/GTF2I/ZHX2/ABI2
CYTH3	0.918003	1.12582	0.0172726	1829	tags=26%, list=3%, signal=25%	FLNA/IQGAP1/DSTN/ACTA2/ACTN4/MYH9/EPAS1/PML/CNOT1/CYFIP1/TLN1/GYS1/ACTB/STRAP/DHX9/GTF2I/UBASH3B/WASF2/PPM1F/DBN1/NCKAP1/SPART
ADAM22	0.899835	1.10501	0.0211777	2009	tags=15%, list=4%, signal=15%	CD2AP/ANP32E/DBN1/DHX9/ABI2/ACTB/CNOT1/ACTG1/NDUFS1/MRPS17/HNRNPH1/HNRNPU/PRDX1
PKD1	0.929235	1.13012	0.041958	711	tags=10%, list=1%, signal=9%	CNOT1/GTF2I/NCKAP1/MYH9/IPO7/CYFIP1/ACTN4/HNRNPH1
CSDE1	0.916811	1.13469	0.035964	1584	tags=18%, list=3%, signal=17%	CNOT1/SART3/DHX9/GTF2I/WASF2/NDUFS1/HNRNPH1/GCN1/LRPPRC/NDUFA10/STRAP/NCKAP1/FLNB/RNH1/HNRNPM
UBE3C	0.921739	1.11637	0.036963	1758	tags=13%, list=3%, signal=13%	GTF2I/CNOT1/NDUFS1/CHCHD3/MYH9/IPO7/ACTA2/BOP1/NDUFA11/TRIP6/GCN1
POMT2	0.925931	1.17651	0.00100325	1935	tags=23%, list=4%, signal=22%	ABI2/HNRNPM/TARDBP/SAFB2/SMPD4/HNRNPA3/FLNA/SART3/GCN1/HNRNPH1/RPN1/CHD4/GYS1/DHX9/RNH1/STRAP/ANP32E/PCBP2/FANCI
MLXIPL	0.891613	1.10944	0.035964	2937	tags=19%, list=5%, signal=18%	DBN1/FLNA/ACTB/IQGAP1/AAAS/UBASH3B/NLN/NDUFA11/SLC2A1/GYS1/SAFB2/CD2AP/ARMC6/BOP1/RRP1/RAC1
EEF1AKNMT	0.922413	1.14669	0.0214781	1961	tags=21%, list=4%, signal=21%	HNRNPU/DHX9/SMPD4/LRPPRC/SART3/IPO7/RPA1/HNRNPM/RNH1/NDUFS2/ATXN10/ANP32E/PCBP2/GCN1/NDUFA10/SPART/CHCHD3/FLNB
DYRK4	0.875685	1.1305	0.00331133	4563	tags=24%, list=8%, signal=22%	CHD4/PCBP2/MYL6/STRAP/ACTB/FANCI/RAC1/RPN1/BRK1/ACTG2/RNH1/DSTN/ACTA2/PDLIM1/ANP32E/SPART/NDUFS2/EPAS1/MYH10/ACTC1
ZNF207	0.940221	1.12096	0.045954	1762	tags=20%, list=3%, signal=20%	HNRNPU/SART3/CD2AP/HNRNPA3/SMPD4/DHX9/HNRNPH1/FANCI/PRC1/RPA1/WASF2/ACTN4/HNRNPM/NCKAP1/TARDBP/RAC1/DSTN
UQCRC1	0.829962	1.09149	0.038961	6411	tags=29%, list=12%, signal=25%	OXSM/NDUFS2/CHCHD3/NDUFC1/EPAS1/ACTB/SLC2A1/PRDX1/RUFY1/RPN1/SAMM50/MRPS17/SLC2A3/TLN1/ACTG2/BRK1/NDUFA11/STRAP/UBASH3B/RPA1/RNH1/FLNA/NLN/AAAS
STARD3NL	0.911502	1.14374	0.0129281	2000	tags=25%, list=4%, signal=24%	SLC2A1/SMPD4/RAC1/BRK1/HNRNPA3/IQGAP1/GYS1/SAFB2/HNRNPU/PML/CAPZB/DBN1/TARDBP/ACTB/FLNB/FANCI/INF2/UBASH3B/HNRNPM/ABI2/RPN1
NCAPD2	0.954255	1.15285	0.0114335	1349	tags=23%, list=2%, signal=22%	FANCI/SMPD4/HNRNPM/HNRNPU/RPA1/TARDBP/DHX9/SART3/WASF2/PRC1/STRAP/GCN1/CHD4/ATXN10/AAAS/ACTN4/HNRNPA3/IPO7/NCKAP1
IFFO1	0.844509	1.09301	0.040959	2848	tags=12%, list=5%, signal=11%	RPA1/SART3/CAPZB/SMPD4/PDLIM1/ACTN4/MYL6/AAAS/GYS1/SAFB2
NISCH	0.905571	1.13022	0.02997	1860	tags=19%, list=3%, signal=18%	SMPD4/FLNB/SART3/SAFB2/ANP32E/CD2AP/HNRNPU/PPM1F/WASF2/BRK1/ZHX2/INF2/ARMC6/ACTN4/IPO4/ACTB
LRRC23	0.834309	1.08907	0.038961	6272	tags=25%, list=11%, signal=22%	DBN1/BRK1/NDUFC1/STRAP/IQGAP1/CHD4/FANCI/PRDX1/RRP1/NDUFA10/OXSM/ACTG1/SLC2A3/FLNB/IPO4/ACTG2/PDLIM1/TARDBP/ABI2/RAC1/IPO7
LYPLA2	0.896156	1.14647	0.0109852	3678	tags=20%, list=7%, signal=19%	CAPZB/BRK1/TARDBP/WASF2/HNRNPM/SART3/RRP1/RPN1/GTF2I/NDUFS1/GCN1/SQSTM1/TNKS1BP1/SLC2A3/SAMM50/FLNA/CD2AP
MKS1	0.898744	1.1233	0.032967	1730	tags=14%, list=3%, signal=14%	SMPD4/AAAS/TARDBP/HNRNPH1/FANCI/SART3/ABI2/HNRNPU/NSUN2/NUBPL/HNRNPM/NDUFC1
AKAP8L	0.922075	1.1443	0.0139743	1574	tags=21%, list=3%, signal=21%	SART3/HNRNPH1/SMPD4/SAFB2/HNRNPU/GCN1/AAAS/RUFY1/RPA1/HNRNPM/PCBP2/ACTN4/TARDBP/NDUFA11/GYS1/ABI2/DHX9/MYL6
UTP18	0.953192	1.1685	0.00186843	980	tags=23%, list=2%, signal=22%	FANCI/DHX9/HNRNPU/HNRNPA3/TARDBP/HNRNPM/SART3/LRPPRC/GCN1/PCBP2/ZHX2/BRK1/FLNB/SMPD4/RAC1/ATXN10/SLC2A1/ACTG1/BOP1
RNF216	0.923449	1.13284	0.031968	2128	tags=25%, list=4%, signal=24%	DHX9/IPO7/GYS1/SMPD4/SAFB2/LRPPRC/RPA1/SLC2A1/SART3/RAC1/HNRNPU/ACTN4/WASF2/ABI2/PPM1F/CD2AP/CHCHD3/PRC1/ACTB/STRAP/SLC7A11
PTBP1	0.948108	1.14336	0.00934116	1183	tags=21%, list=2%, signal=21%	SMPD4/HNRNPU/DHX9/AAAS/HNRNPM/HNRNPA3/SAFB2/ACTN4/GCN1/ABI2/TARDBP/ANP32E/SART3/LRPPRC/HNRNPH1/PCBP2/RRP1/RAC1
LARS2	0.90704	1.13485	0.031968	3871	tags=27%, list=7%, signal=25%	CNOT1/GTF2I/NDUFS1/NCKAP1/MYH10/GCN1/SART3/NDUFA11/CHD4/OXSM/DHX9/NSUN2/CHCHD3/HNRNPH1/MYH9/FLNB/NLN/NDUFA10/NDUFS2/PRDX1/FLNA/MRPS17/CAPZB
PPP5C	0.94731	1.14353	0.00412711	1634	tags=27%, list=3%, signal=27%	DHX9/SMPD4/RPA1/ACTN4/HNRNPM/CNOT1/SAFB2/SART3/ABI2/IPO7/GYS1/GCN1/HNRNPA3/NDUFA11/STRAP/LRPPRC/PRDX1/TLN1/HNRNPU/FANCI/CHCHD3/HNRNPH1/MYH10
ERCC1	0.921225	1.15748	0.0088928	2104	tags=18%, list=4%, signal=17%	BRK1/GYS1/MYL6/PCBP2/TARDBP/AAAS/RRP1/NDUFC1/ACTG1/TRIP6/CHD4/RNH1/SLC2A1/PRDX1/NDUFA10
MBTPS2	0.915248	1.13713	0.036963	1541	tags=13%, list=3%, signal=13%	GTF2I/NCKAP1/CNOT1/DHX9/NDUFS1/DSTN/LRPPRC/TRIP6/MYH10/STRAP/HNRNPU
PRICKLE3	0.914872	1.14086	0.0114335	1626	tags=24%, list=3%, signal=23%	DHX9/CNOT1/SART3/GTF2I/NCKAP1/TLN1/GCN1/MYH9/SMPD4/RNH1/TNKS1BP1/ABI2/SLC2A1/SLC3A2/PRDX1/WASF2/ACTN4/ACTBL2/STRAP/SQSTM1
EXTL3	0.883375	1.11351	0.037962	4526	tags=30%, list=8%, signal=27%	DHX9/IPO7/ACTN4/GCN1/RPA1/SLC3A2/PPM1F/SMPD4/WASF2/BOP1/RNH1/GTF2I/NCKAP1/AAAS/MYH9/HNRNPH1/TRIP6/PCBP2/GYS1/ACTA2/HNRNPA3/RPN1/PML/NDUFA11/STRAP
UBR7	0.910135	1.12276	0.044955	3974	tags=37%, list=7%, signal=34%	DHX9/SART3/HNRNPH1/FANCI/HNRNPM/HNRNPU/ABI2/IPO7/HNRNPA3/TLN1/SAFB2/ACTB/INF2/RPA1/TRIP6/ACTN4/RPN1/SMPD4/PML/PRC1/SLC3A2/CHCHD3/ACTG1/ACTA2/BRK1/PCBP2/DBN1/NDUFC1/MYH9/DSTN/GCN1
MAN2B2	0.885994	1.14256	0.00650665	2483	tags=15%, list=5%, signal=15%	CNOT1/ACTN4/NDUFS1/MYH9/NCKAP1/RPN1/TLN1/NDUFS2/NDUFA11/GYS1/SLC2A1/GTF2I/HNRNPM
RWDD2A	0.873997	1.12827	0.00874334	1916	tags=13%, list=3%, signal=13%	HNRNPA3/ABI2/HNRNPH1/HNRNPM/HNRNPU/SART3/ANP32E/STRAP/ACTG1/ACTA1/ARMC6
POLR3B	0.917108	1.16156	0.00687845	1845	tags=23%, list=3%, signal=22%	ACTN4/DHX9/LRPPRC/HNRNPU/GCN1/RPA1/IPO7/CNOT1/MYH10/NDUFS1/SART3/RUFY1/ABI2/RPN1/ATXN10/FLNA/NCKAP1/CYFIP1/ZHX2
DDX11	0.906041	1.1332	0.030969	1498	tags=17%, list=3%, signal=16%	PRC1/TARDBP/ABI2/HNRNPU/SAFB2/SMPD4/AAAS/DHX9/FANCI/PPM1F/HNRNPA3/HNRNPH1/HNRNPM/PML
HEBP1	0.866738	1.14237	0.00197942	3380	tags=27%, list=6%, signal=26%	STRAP/TNKS1BP1/NDUFA10/MYH9/IQGAP1/MYH10/MYL6/ACTN4/HNRNPU/BRK1/TARDBP/NCKAP1/UBASH3B/SAFB2/CHD4/MRPS17/ATXN10/SLC2A1/CAPZB/SAMM50/AAAS/ACTB/SART3
ZC3H3	0.889266	1.13045	0.040959	2930	tags=21%, list=5%, signal=20%	BOP1/ZHX2/ACTN4/RUFY1/HNRNPU/SMPD4/RNH1/ANP32E/SLC7A11/RRP1/AAAS/NLN/GCN1/PPM1F/SLC3A2/ARMC6/ACTG2/MRPS17
CAPN1	0.931517	1.16329	0.00172116	1502	tags=21%, list=3%, signal=21%	CYFIP1/SMPD4/HNRNPM/NCKAP1/ATXN10/HNRNPU/DHX9/RPA1/TLN1/TNKS1BP1/ACTN4/MYH9/RNH1/CD2AP/INF2/GYS1/NDUFS2/ACTA2
MTMR11	0.848672	1.10461	0.026973	3333	tags=21%, list=6%, signal=20%	ZHX2/SQSTM1/NLN/SLC7A11/ANP32E/PDLIM1/SLC3A2/SLC2A1/RNH1/NSUN2/DBN1/HNRNPA3/RUFY1/NUBPL/SART3/NDUFS1/BOP1/MYH9
CHDH	0.849724	1.10369	0.0160711	5210	tags=30%, list=9%, signal=27%	ZHX2/FLNB/TLN1/NSUN2/CD2AP/TNKS1BP1/LRPPRC/SLC3A2/MYH9/CAPZB/HNRNPU/NDUFS2/BRK1/MRPS17/OXSM/SAMM50/MYL6/SMPD4/SLC2A1/NUBPL/SLC7A11/ACTG1/NDUFA10/RNH1/IPO7
ATP2C1	0.935082	1.12624	0.046953	1697	tags=15%, list=3%, signal=15%	NCKAP1/CNOT1/DHX9/CYFIP1/RAC1/MYH9/IPO7/CHCHD3/CAPZB/NSUN2/WASF2/SMPD4/TNKS1BP1
CXorf56	0.900301	1.12162	0.038961	3567	tags=29%, list=6%, signal=27%	SMPD4/FANCI/ANP32E/DHX9/HNRNPU/HNRNPM/SART3/NSUN2/TLN1/CHCHD3/MYH9/ACTN4/ZHX2/RNH1/PRDX1/STRAP/SLC2A1/CAPZB/TARDBP/GYS1/LRPPRC/RAC1/DSTN/RUFY1
TTC27	0.94241	1.15656	0.00964007	1616	tags=20%, list=3%, signal=20%	TARDBP/HNRNPU/LRPPRC/SMPD4/HNRNPA3/DHX9/SART3/ANP32E/HNRNPM/PCBP2/CNOT1/ATXN10/PPM1F/CAPZB/RPN1/PML/STRAP
PHLDB1	0.948463	1.11076	0.036963	1718	tags=19%, list=3%, signal=18%	IQGAP1/FLNA/ABI2/EPAS1/NCKAP1/MYH10/TLN1/PML/ACTA2/MYH9/GTF2I/ACTN4/RPN1/DBN1/CNOT1/HNRNPH1
PRDM11	0.902219	1.12149	0.0292882	2332	tags=20%, list=4%, signal=19%	ABI2/SAFB2/ATXN10/SMPD4/NCKAP1/IPO7/HNRNPH1/DBN1/CYFIP1/PML/NLN/BRK1/GYS1/DSTN/CHD4/RPA1/CD2AP
NCDN	0.927364	1.13817	0.0157707	2292	tags=26%, list=4%, signal=25%	GYS1/ABI2/SAFB2/WASF2/SART3/DSTN/SMPD4/DBN1/HNRNPU/PML/RUFY1/RAC1/IQGAP1/ACTBL2/STRAP/SLC2A1/CAPZB/ACTB/ACTN4/RNH1/BRK1/RPN1
ZFP64	0.939774	1.14576	0.0169723	2076	tags=27%, list=4%, signal=26%	HNRNPM/SART3/SMPD4/ACTN4/RPA1/NCKAP1/HNRNPU/CNOT1/GTF2I/CYFIP1/PRC1/CHCHD3/DHX9/ATXN10/AAAS/HNRNPA3/PCBP2/ABI2/SAFB2/MYH9/ACTB/GCN1/ACTA2
MNAT1	0.888321	1.1424	0.0169723	4605	tags=35%, list=8%, signal=32%	DHX9/PCBP2/HNRNPH1/HNRNPU/SART3/AAAS/TARDBP/MYH9/SAFB2/CYFIP1/GTF2I/SQSTM1/SAMM50/MYL6/DSTN/NDUFC1/ACTG1/ANP32E/WASF2/GCN1/SLC7A11/BRK1/CD2AP/NDUFS1/ACTG2/ACTA1/SLC2A3/IQGAP1/BOP1
MRE11	0.942547	1.13674	0.0329047	716	tags=17%, list=1%, signal=16%	HNRNPU/HNRNPA3/SMPD4/FANCI/CD2AP/HNRNPH1/HNRNPM/MYH9/ABI2/NCKAP1/TARDBP/ACTG1/ACTN4/DHX9
SERPINB1	0.864918	1.10784	0.048951	3995	tags=23%, list=7%, signal=21%	CD2AP/TARDBP/PPM1F/ATXN10/RPA1/RAC1/SLC2A1/DSTN/HNRNPU/CHCHD3/NDUFA10/INF2/MRPS17/NCKAP1/SLC2A3/PCBP2/FLNA/HNRNPM/BOP1
SLC7A9	0.881387	1.12168	0.0193754	2500	tags=25%, list=5%, signal=24%	DBN1/DHX9/ACTN4/GTF2I/PML/NDUFA11/NDUFA10/IPO7/ACTG1/SART3/NDUFS1/SQSTM1/SLC3A2/NCKAP1/CNOT1/HNRNPU/DSTN/FLNB/MYH9/NLN/NDUFS2
SPAST	0.940873	1.14736	0.0163715	745	tags=10%, list=1%, signal=9%	NCKAP1/LRPPRC/DHX9/IPO7/SMPD4/HNRNPU/CD2AP/ABI2
RTF2	0.917976	1.14958	0.0054656	1370	tags=20%, list=2%, signal=20%	CAPZB/PCBP2/TARDBP/BRK1/HNRNPA3/HNRNPU/SMPD4/RNH1/WASF2/GYS1/HNRNPM/FANCI/GCN1/AAAS/CHCHD3/MYL6/SLC2A1
BIRC3	0.864062	1.1071	0.047952	1594	tags=11%, list=3%, signal=10%	PML/UBASH3B/IQGAP1/DSTN/SQSTM1/FLNB/GTF2I/NLN/TNKS1BP1
DERA	0.839325	1.09464	0.031968	6690	tags=27%, list=12%, signal=24%	STRAP/CNOT1/CHCHD3/NUBPL/NDUFS1/AAAS/RRP1/SAFB2/GTF2I/SLC7A11/CAPZB/RPN1/DHX9/FLNA/EPAS1/NLN/NDUFA10/HNRNPU/BRK1/SPART/ACTA2/TARDBP/IPO4
STRAP	0.903774	1.13897	0.0103874	3251	tags=36%, list=6%, signal=34%	DHX9/GYS1/CHCHD3/DBN1/NCKAP1/LRPPRC/HNRNPA3/HNRNPM/CYFIP1/CHD4/SLC2A1/RAC1/GCN1/SART3/FANCI/BRK1/ATXN10/WASF2/ACTA2/SAFB2/MYH9/NDUFA10/TARDBP/IPO7/UBASH3B/SMPD4/SAMM50/BOP1/RPA1/TLN1
ABCC2	0.889451	1.10705	0.030969	3839	tags=21%, list=7%, signal=20%	NLN/DBN1/SQSTM1/DSTN/NUBPL/CYFIP1/SLC2A3/CHD4/MYH10/IPO7/SAFB2/IQGAP1/SLC7A11/TRIP6/SAMM50/PML/PDLIM1/MYH9
GCLM	0.92924	1.17893	0.0004443	1729	tags=15%, list=3%, signal=15%	CYFIP1/SQSTM1/NLN/PRDX1/CNOT1/SLC7A11/DHX9/OXSM/NDUFS1/SLC3A2/IPO7/ZHX2/BOP1
DEPDC1	0.948895	1.14526	0.041958	1214	tags=13%, list=2%, signal=13%	FANCI/SART3/HNRNPM/HNRNPA3/SMPD4/TARDBP/WASF2/PRC1/ANP32E/PRDX1/BOP1
HSF2	0.930513	1.14488	0.0295885	1627	tags=19%, list=3%, signal=19%	SMPD4/DHX9/HNRNPA3/HNRNPU/FANCI/SART3/ANP32E/TARDBP/NCKAP1/PCBP2/HNRNPH1/CAPZB/CD2AP/ZHX2/PML/NSUN2
PHF20	0.931012	1.12265	0.047952	1297	tags=15%, list=2%, signal=15%	DHX9/SART3/IPO7/NCKAP1/LRPPRC/SMPD4/HNRNPU/TARDBP/RPA1/CHCHD3/ANP32E/GCN1/CYFIP1
NCAPH2	0.928534	1.15085	0.0100884	1567	tags=19%, list=3%, signal=19%	RRP1/AAAS/HNRNPM/PRC1/FANCI/TARDBP/GCN1/ATXN10/RPN1/PCBP2/SAMM50/RUFY1/SMPD4/RNH1/MYL6/BRK1
TOMM34	0.904392	1.13249	0.0193754	3314	tags=32%, list=6%, signal=30%	TARDBP/CAPZB/RAC1/RRP1/RNH1/AAAS/WASF2/ACTB/SART3/RUFY1/PRDX1/ZHX2/BRK1/HNRNPU/PML/CHCHD3/SMPD4/IQGAP1/ATXN10/NDUFS2/CD2AP/IPO4/ACTN4/TRIP6/PPM1F/ACTC1/HNRNPA3
KPNA6	0.929301	1.12346	0.046953	1327	tags=17%, list=2%, signal=16%	CNOT1/GTF2I/ACTN4/WASF2/CYFIP1/CAPZB/RAC1/EPAS1/IPO7/STRAP/ACTA2/MYH9/HNRNPM/SAFB2
RNASET2	0.883112	1.10509	0.043956	2859	tags=15%, list=5%, signal=15%	CHD4/DBN1/INF2/BRK1/NDUFA11/MYL6/FLNB/RRP1/DSTN/ACTB/SLC2A3/SQSTM1/NUBPL
MIPEP	0.874259	1.13291	0.00859389	3685	tags=26%, list=7%, signal=24%	STRAP/NUBPL/MYH10/CHCHD3/HNRNPU/CNOT1/RPA1/DHX9/HNRNPM/NCKAP1/RNH1/NDUFS1/NDUFS2/IQGAP1/LRPPRC/GCN1/DSTN/HNRNPA3/ARMC6/PPM1F/CAPZB/MYL6
VRK2	0.942034	1.11433	0.046953	1757	tags=23%, list=3%, signal=22%	CNOT1/NCKAP1/DHX9/IPO7/GTF2I/LRPPRC/HNRNPU/GCN1/WASF2/RPA1/TLN1/SLC2A1/HNRNPH1/MYH9/ACTB/OXSM/CYFIP1/CHCHD3/CAPZB
BRD9	0.921557	1.14422	0.0058374	1562	tags=21%, list=3%, signal=21%	SMPD4/TARDBP/HNRNPU/HNRNPH1/NSUN2/HNRNPM/DHX9/GCN1/HNRNPA3/CD2AP/SART3/AAAS/GYS1/ATXN10/RUFY1/NLN/SAFB2/RRP1
RABEP1	0.933526	1.15063	0.027972	1487	tags=15%, list=3%, signal=15%	CNOT1/GTF2I/MYH10/CYFIP1/NDUFS1/RPA1/EPAS1/HNRNPM/DHX9/SPART/NDUFS2/ATXN10/ACTA2
NUP160	0.951959	1.13726	0.0232804	1273	tags=14%, list=2%, signal=14%	DHX9/SMPD4/SART3/IPO7/GTF2I/CNOT1/LRPPRC/NCKAP1/HNRNPU/MYH10/CD2AP/ANP32E
GRN	0.894875	1.12158	0.028971	2967	tags=29%, list=5%, signal=27%	CAPZB/RNH1/RPN1/DHX9/ACTB/PML/HNRNPA3/HNRNPM/ACTG1/INF2/WASF2/FLNA/SAFB2/SLC3A2/RUFY1/MYH9/SART3/SQSTM1/ANP32E/SLC7A11/BRK1/MYL6/RRP1/NDUFS1
SARS1	0.885253	1.13682	0.0111346	1557	tags=24%, list=3%, signal=23%	RUFY1/BRK1/RRP1/HNRNPM/RNH1/TARDBP/SLC3A2/ACTB/RAC1/SPART/SLC2A1/ACTG1/PRDX1/LRPPRC/UBASH3B/HNRNPU/CHCHD3/RPN1/TRIP6/GCN1
RANBP3	0.938039	1.14649	0.00844443	1389	tags=20%, list=3%, signal=20%	SAFB2/HNRNPM/RPA1/SMPD4/HNRNPA3/SART3/DHX9/AAAS/GYS1/ACTN4/TNKS1BP1/HNRNPU/PRDX1/RUFY1/FLNA/NDUFA11/RNH1
ALG1	0.894346	1.1315	0.028971	2859	tags=29%, list=5%, signal=27%	SQSTM1/RNH1/PRDX1/CNOT1/DHX9/ZHX2/ACTA2/FLNB/NDUFA11/SLC3A2/CHCHD3/NLN/BRK1/ACTN4/PPM1F/OXSM/FLNA/MYH9/ACTG1/ACTB/RAC1/GCN1/SAMM50/ABI2
ABCF2	0.901971	1.12713	0.025974	3492	tags=29%, list=6%, signal=27%	TARDBP/CHD4/RRP1/IPO4/ACTB/BOP1/MYL6/NDUFA11/RNH1/MRPS17/DBN1/PCBP2/NDUFA10/FANCI/RAC1/ZHX2/SLC2A1/CHCHD3/RUFY1/STRAP/CNOT1/BRK1/SLC2A3/SLC3A2
CHPF2	0.90475	1.12862	0.0181738	2235	tags=30%, list=4%, signal=29%	DHX9/CHCHD3/ABI2/CYFIP1/UBASH3B/SART3/SMPD4/HNRNPM/IPO7/TNKS1BP1/ACTB/ACTN4/TRIP6/SLC2A1/GCN1/INF2/EPAS1/GYS1/PML/CNOT1/GTF2I/SQSTM1/SLC2A3/SAFB2/NDUFS1
ATP6V0A1	0.864373	1.12277	0.0166719	3894	tags=24%, list=7%, signal=22%	SLC3A2/RNH1/ZHX2/SAMM50/RUFY1/PPM1F/DHX9/NUBPL/GCN1/SQSTM1/CAPZB/NDUFS2/MRPS17/NDUFA10/GTF2I/CHD4/FANCI/SLC7A11/DBN1/FLNB
MAP2K3	0.830864	1.10575	0.00964007	6282	tags=32%, list=11%, signal=29%	TRIP6/INF2/RNH1/EPAS1/ABI2/MYH9/CYFIP1/RPA1/SPART/UBASH3B/ACTB/PDLIM1/PPM1F/SAMM50/NDUFA10/MYH10/OXSM/SLC2A3/IQGAP1/LRPPRC/PRDX1/ARMC6/ACTG2/RAC1/PRC1/TARDBP/SQSTM1
RNF19A	0.881359	1.10971	0.041958	3343	tags=26%, list=6%, signal=25%	NCKAP1/IPO7/MYH9/SART3/NSUN2/CYFIP1/IQGAP1/PML/DHX9/SMPD4/BOP1/HNRNPU/ZHX2/HNRNPH1/SQSTM1/SLC3A2/NLN/RNH1/FLNA/PRDX1/NDUFA11/RAC1
VCL	0.942349	1.13333	0.0135259	1135	tags=18%, list=2%, signal=18%	IQGAP1/TLN1/NCKAP1/FLNA/MYH9/DHX9/CNOT1/HNRNPM/ANP32E/ABI2/PML/ACTG1/SART3/NDUFS1/STRAP
NSMAF	0.891114	1.12026	0.034965	3539	tags=27%, list=6%, signal=26%	SAFB2/IQGAP1/PML/HNRNPH1/FLNA/SART3/ACTN4/HNRNPM/PPM1F/UBASH3B/ACTG1/HNRNPU/ZHX2/ACTB/TLN1/BOP1/SMPD4/TRIP6/BRK1/AAAS/TARDBP/NDUFS2/RAC1
ADSS2	0.929283	1.1431	0.0232804	1624	tags=14%, list=3%, signal=14%	HNRNPU/NCKAP1/DHX9/IPO7/SMPD4/CNOT1/CD2AP/SAFB2/LRPPRC/SPART/DBN1/ACTN4
RFC1	0.917484	1.13658	0.0217785	1685	tags=18%, list=3%, signal=17%	NCKAP1/LRPPRC/CYFIP1/HNRNPU/IPO7/CD2AP/CNOT1/DHX9/HNRNPA3/GTF2I/SART3/SMPD4/ABI2/FLNB/ACTN4
TUBG2	0.911896	1.15063	0.00695281	1299	tags=13%, list=2%, signal=13%	FANCI/HNRNPH1/SART3/ABI2/SMPD4/HNRNPA3/HNRNPU/TARDBP/SLC7A11/DBN1/PRC1
RPL26L1	0.853232	1.10173	0.045954	3200	tags=20%, list=6%, signal=19%	MYL6/RUFY1/RNH1/BRK1/NDUFC1/PRDX1/NDUFA10/SLC3A2/BOP1/OXSM/SQSTM1/AAAS/ACTB/SAFB2/NDUFS2/EPAS1/SLC7A11
AGA	0.851983	1.11776	0.0120314	2909	tags=18%, list=5%, signal=17%	IQGAP1/HNRNPM/RUFY1/RAC1/HNRNPU/CAPZB/UBASH3B/TLN1/RPN1/EPAS1/CD2AP/GYS1/SLC7A11/SQSTM1/NDUFC1
TRIO	0.931814	1.13236	0.02997	1602	tags=17%, list=3%, signal=16%	IPO7/SART3/ACTN4/SMPD4/MYH9/IQGAP1/NSUN2/FLNA/HNRNPM/GYS1/ABI2/SLC3A2/NCKAP1/GTF2I
MTREX	0.945059	1.13793	0.0262843	1940	tags=27%, list=4%, signal=26%	CNOT1/HNRNPU/SMPD4/IPO7/HNRNPH1/NCKAP1/DHX9/GTF2I/SART3/MYH9/TLN1/CYFIP1/LRPPRC/ACTA2/RPA1/NSUN2/HNRNPM/GCN1/FLNB/SAMM50/ACTN4/NDUFS1/CHCHD3
PNKP	0.885957	1.11115	0.040959	3203	tags=26%, list=6%, signal=25%	RRP1/ABI2/SART3/SAFB2/HNRNPM/FANCI/ACTB/RAC1/GYS1/CHD4/SLC7A11/TRIP6/SLC2A1/CYFIP1/HNRNPH1/SMPD4/SLC3A2/HNRNPA3/WASF2/IPO7/ACTC1/PRDX1
SLC66A1	0.86847	1.1136	0.044955	5669	tags=31%, list=10%, signal=28%	CAPZB/RUFY1/BRK1/ACTB/MYL6/CHD4/TARDBP/WASF2/MRPS17/SAFB2/ARMC6/GTF2I/BOP1/SAMM50/ACTA2/NDUFS1/SLC3A2/NLN/PRC1/INF2/IPO7/DSTN/DHX9/SPART/NDUFA11/AAAS
INPP4A	0.926755	1.11276	0.02997	1033	tags=13%, list=2%, signal=13%	NCKAP1/DHX9/IQGAP1/WASF2/HNRNPU/HNRNPA3/TARDBP/SPART/ABI2/FLNA/MYH9
RAB27B	0.876662	1.08848	0.047952	1096	tags=11%, list=2%, signal=11%	CD2AP/DSTN/IPO7/UBASH3B/SART3/MYH9/HNRNPU/LRPPRC/HNRNPM
PSMA4	0.921685	1.16041	0.00201642	2806	tags=26%, list=5%, signal=25%	TARDBP/BRK1/RAC1/MYL6/FANCI/HNRNPM/PRC1/HNRNPA3/CHD4/CAPZB/NDUFC1/PRDX1/TRIP6/RPN1/ACTB/IPO7/CD2AP/SLC3A2/NDUFA10/ATXN10/MYH10/ACTG2
LSG1	0.9357	1.14	0.00747334	1770	tags=21%, list=3%, signal=21%	SART3/SMPD4/HNRNPU/NCKAP1/MYH9/DHX9/TARDBP/ABI2/FLNB/IPO7/NSUN2/CNOT1/RUFY1/ACTN4/WASF2/SAFB2/LRPPRC/HNRNPM
TNC	0.924815	1.14589	0.0196757	1609	tags=13%, list=3%, signal=13%	SLC2A3/IQGAP1/FLNA/ACTG1/SPART/UBASH3B/DSTN/SLC7A11/CNOT1/ZHX2/ACTA2
THAP3	0.860156	1.10707	0.043956	4266	tags=18%, list=8%, signal=16%	RRP1/TARDBP/CAPZB/CHD4/RNH1/RAC1/RUFY1/ARMC6/EPAS1/NLN/GTF2I/SLC2A1/SAMM50/SAFB2/PRDX1
TDP1	0.939365	1.16559	0.00598612	1879	tags=18%, list=3%, signal=17%	SART3/HNRNPU/HNRNPM/HNRNPA3/SMPD4/DHX9/GCN1/AAAS/RPA1/LRPPRC/FANCI/NDUFA11/RNH1/RPN1/SLC2A1
ADAM28	0.959387	1.10445	0.00524251	815	tags=6%, list=1%, signal=6%	UBASH3B/FLNA/IQGAP1/DBN1/NDUFC1
JADE2	0.942971	1.18068	0.000257468	1472	tags=25%, list=3%, signal=24%	HNRNPU/HNRNPM/IQGAP1/WASF2/CD2AP/GCN1/SART3/ACTN4/DHX9/SMPD4/HNRNPA3/PPM1F/PML/DSTN/FLNA/RPA1/RUFY1/GYS1/TARDBP/FLNB/UBASH3B
CTNNA1	0.933166	1.16567	0.00412711	2243	tags=26%, list=4%, signal=25%	HNRNPU/DHX9/ACTN4/SART3/SMPD4/MYH9/CNOT1/IPO7/AAAS/NCKAP1/CD2AP/NLN/RUFY1/SQSTM1/SLC3A2/NDUFA11/RAC1/PML/RNH1/PRC1/NSUN2/CYFIP1
DSG2	0.888382	1.09821	0.037962	2406	tags=15%, list=4%, signal=15%	HNRNPH1/ABI2/FANCI/HNRNPA3/NCKAP1/IQGAP1/GYS1/TARDBP/PRC1/SAMM50/HNRNPM/CD2AP/TRIP6
GEMIN8	0.907996	1.16454	0.00234939	3791	tags=33%, list=7%, signal=31%	RPA1/AAAS/HNRNPU/HNRNPM/PCBP2/CAPZB/SAFB2/TARDBP/PPM1F/CHD4/BRK1/FANCI/DHX9/WASF2/NUBPL/OXSM/SAMM50/NDUFS1/DBN1/SPART/IQGAP1/HNRNPA3/CYFIP1/RNH1/ACTN4/MRPS17/BOP1/LRPPRC
OFD1	0.921103	1.13871	0.0329047	1438	tags=10%, list=3%, signal=9%	HNRNPH1/SMPD4/HNRNPU/HNRNPA3/DHX9/AAAS/UBASH3B/NSUN2
CTPS2	0.91858	1.15484	0.00904225	1399	tags=14%, list=3%, signal=14%	DHX9/SMPD4/LRPPRC/HNRNPU/GCN1/IPO7/HNRNPM/NCKAP1/RPA1/DBN1/SAFB2/ACTA1
ATP6V1H	0.888483	1.13531	0.0141238	2766	tags=24%, list=5%, signal=23%	BOP1/HNRNPM/ACTG1/NCKAP1/SPART/TLN1/SLC3A2/RNH1/PRDX1/SQSTM1/STRAP/ZHX2/NSUN2/MYL6/CYFIP1/DHX9/ACTB/RRP1/HNRNPA3/RPA1
TPR	0.944231	1.12073	0.047952	1548	tags=21%, list=3%, signal=21%	DHX9/IPO7/SART3/NCKAP1/HNRNPU/SMPD4/GTF2I/MYH9/CD2AP/CNOT1/ATXN10/RPA1/TLN1/FLNB/AAAS/HNRNPA3/MYH10/HNRNPH1
C12orf4	0.928406	1.15161	0.00904225	2076	tags=32%, list=4%, signal=31%	SART3/HNRNPM/SMPD4/IPO7/GYS1/FANCI/IQGAP1/HNRNPU/GCN1/FLNA/DHX9/ABI2/STRAP/RAC1/ACTG1/FLNB/UBASH3B/SLC2A3/PML/CHD4/TARDBP/HNRNPH1/BOP1/DBN1/WASF2/CAPZB/HNRNPA3
MAP4	0.940183	1.17171	0.00297835	1624	tags=31%, list=3%, signal=30%	SMPD4/GYS1/UBASH3B/WASF2/CYFIP1/IPO7/IQGAP1/PML/DSTN/RPA1/NCKAP1/TLN1/RAC1/DHX9/CAPZB/ACTB/LRPPRC/CD2AP/SPART/ACTG1/GCN1/HNRNPM/NSUN2/TNKS1BP1/FLNB/PDLIM1
TSPAN17	0.900918	1.14984	0.00457327	1723	tags=21%, list=3%, signal=21%	INF2/RUFY1/PPM1F/PML/RNH1/SQSTM1/NLN/RRP1/UBASH3B/ABI2/DSTN/MYL6/TNKS1BP1/ACTG1/FLNA/TRIP6/NDUFS2/GCN1
CC2D2A	0.89709	1.10945	0.043956	2323	tags=18%, list=4%, signal=17%	ABI2/IQGAP1/SAFB2/CAPZB/HNRNPU/UBASH3B/STRAP/RPA1/FLNB/BRK1/TNKS1BP1/DHX9/ATXN10/WASF2/ACTA1
SNX29	0.932697	1.13943	0.00360732	1161	tags=14%, list=2%, signal=14%	IQGAP1/NCKAP1/TLN1/CYFIP1/PML/SMPD4/SLC2A1/MYH9/FLNA/DSTN/NDUFA11/WASF2
LMO3	0.933443	1.12478	0.046953	1674	tags=7%, list=3%, signal=7%	HNRNPM/AAAS/STRAP/ACTB/SAFB2/GYS1
R3HDM1	0.949727	1.15993	0.0071759	626	tags=15%, list=1%, signal=15%	HNRNPA3/RPA1/DHX9/SMPD4/ABI2/ANP32E/HNRNPM/NCKAP1/LRPPRC/HNRNPU/TARDBP/RPN1/GCN1
COL9A2	0.917547	1.09748	0.034965	2072	tags=15%, list=4%, signal=15%	DBN1/SAFB2/SLC2A1/FLNA/ABI2/HNRNPU/DSTN/ANP32E/ATXN10/CD2AP/ACTG1/HNRNPA3/CYFIP1
KITLG	0.87929	1.10201	0.038961	4190	tags=30%, list=8%, signal=28%	NCKAP1/HNRNPM/SART3/FLNA/ABI2/FANCI/ANP32E/SLC7A11/HNRNPU/NUBPL/IQGAP1/AAAS/IPO7/SMPD4/SQSTM1/RPN1/NDUFA10/ACTA2/ACTC1/CHCHD3/RPA1/TNKS1BP1/BRK1/MRPS17/ACTN4
ERCC8	0.940325	1.18971	0.000325821	1543	tags=21%, list=3%, signal=21%	DHX9/HNRNPH1/IPO7/LRPPRC/HNRNPA3/SART3/SMPD4/HNRNPU/HNRNPM/ATXN10/AAAS/GCN1/RUFY1/NSUN2/SAFB2/ACTG1/PCBP2/CHCHD3
VAMP3	0.890152	1.11199	0.03996	3691	tags=32%, list=7%, signal=30%	CAPZB/CNOT1/PRDX1/NCKAP1/RNH1/TNKS1BP1/CHCHD3/LRPPRC/WASF2/GYS1/SLC2A1/BRK1/IQGAP1/NDUFA10/HNRNPM/IPO7/DHX9/FLNA/SART3/ACTA1/PCBP2/ACTB/ABI2/TLN1/RPN1/EPAS1/PDLIM1
CLPTM1L	0.875991	1.13827	0.00183161	2744	tags=31%, list=5%, signal=29%	NSUN2/RPN1/HNRNPM/SART3/CHCHD3/RNH1/GCN1/ACTB/FANCI/MYH9/RUFY1/CAPZB/INF2/MYL6/NDUFS2/RRP1/IPO7/RAC1/FLNA/WASF2/ACTN4/EPAS1/PRC1/STRAP/PPM1F/SLC7A11
HEXB	0.887117	1.15507	0.00197942	2621	tags=17%, list=5%, signal=16%	SQSTM1/NLN/RNH1/ACTB/NDUFS2/CYFIP1/HNRNPM/ATXN10/SLC3A2/CHCHD3/ACTN4/HNRNPH1/SAMM50/PRDX1
ARHGEF5	0.860585	1.09474	0.046953	4561	tags=30%, list=8%, signal=27%	TLN1/CYFIP1/HNRNPA3/CHCHD3/ACTB/SART3/TARDBP/HNRNPH1/RUFY1/SLC7A11/RNH1/SLC3A2/LRPPRC/ANP32E/STRAP/SLC2A1/DSTN/SLC2A3/IQGAP1/RAC1/NDUFS2/BRK1/SPART/CHD4/MRPS17
LIMA1	0.927597	1.15367	0.00650665	2060	tags=21%, list=4%, signal=21%	IQGAP1/FLNA/NCKAP1/IPO7/TLN1/SART3/GTF2I/ACTN4/HNRNPM/RPA1/PML/EPAS1/ABI2/MYH9/WASF2/PDLIM1/RPN1/UBASH3B
LETMD1	0.895769	1.15806	0.00331133	2818	tags=23%, list=5%, signal=21%	AAAS/SART3/SMPD4/IPO7/PCBP2/LRPPRC/RPA1/HNRNPA3/PPM1F/TNKS1BP1/RAC1/DBN1/WASF2/SLC3A2/RUFY1/PDLIM1/UBASH3B/NUBPL/ZHX2
BCAR1	0.902959	1.12342	0.031968	4170	tags=38%, list=8%, signal=35%	TNKS1BP1/IQGAP1/RNH1/CNOT1/INF2/GYS1/CHCHD3/RAC1/ACTN4/SQSTM1/HNRNPM/ACTB/NCKAP1/FLNA/DBN1/SLC7A11/PPM1F/NDUFS2/ACTBL2/SPART/CYFIP1/MYH9/CD2AP/PML/SLC3A2/BRK1/EPAS1/ACTA2/SAMM50/SLC2A1/MYL6/PCBP2
THOC3	0.883634	1.13704	0.0184742	2742	tags=23%, list=5%, signal=22%	FANCI/SMPD4/AAAS/HNRNPU/HNRNPA3/PCBP2/PRC1/RUFY1/RPA1/TARDBP/HNRNPM/NSUN2/MYL6/ARMC6/SAMM50/IPO4/SLC2A1/SQSTM1/HNRNPH1
RRP12	0.894991	1.12646	0.0265847	3174	tags=25%, list=6%, signal=24%	BOP1/RRP1/ZHX2/GCN1/ACTB/SLC3A2/IPO7/SPART/PPM1F/RNH1/IPO4/HNRNPM/ACTA1/NLN/PRDX1/CNOT1/PRC1/TNKS1BP1/FLNA/UBASH3B/MYH10
MRTO4	0.903344	1.12804	0.042957	2997	tags=24%, list=5%, signal=23%	CAPZB/SART3/TARDBP/BRK1/WASF2/PRC1/RAC1/RRP1/BOP1/GCN1/SLC3A2/STRAP/NLN/PCBP2/ACTA1/TLN1/DBN1/FANCI/NDUFA10/SQSTM1
ANAPC4	0.901058	1.12206	0.036963	2266	tags=12%, list=4%, signal=11%	HNRNPU/SAFB2/HNRNPH1/RPA1/GYS1/WASF2/HNRNPM/PDLIM1/HNRNPA3/RAC1
TRAPPC3	0.939058	1.171	0.00305235	777	tags=13%, list=1%, signal=13%	CAPZB/BRK1/TARDBP/RAC1/SLC2A1/WASF2/MYL6/PRDX1/SLC7A11/CHCHD3/RNH1
OPN3	0.878512	1.11746	0.027972	5226	tags=26%, list=9%, signal=24%	GTF2I/CYFIP1/CNOT1/NCKAP1/IPO7/NDUFS1/NLN/NDUFA11/RRP1/MYH9/HNRNPM/CHCHD3/ACTBL2/ACTA1/HNRNPU/RPA1/ACTN4/PRDX1/ARMC6/RUFY1/RAC1/EPAS1
SDCCAG8	0.923457	1.13518	0.0114335	2328	tags=25%, list=4%, signal=24%	HNRNPU/DHX9/NCKAP1/SART3/ANP32E/DSTN/SMPD4/ABI2/HNRNPM/IPO7/MYH9/TLN1/SPART/RPA1/OXSM/IQGAP1/FLNA/TRIP6/UBASH3B/FLNB/ACTA2
TBC1D22A	0.922013	1.15627	0.00844443	1944	tags=23%, list=4%, signal=22%	ATXN10/PPM1F/SAMM50/HNRNPU/HNRNPM/RRP1/ACTN4/SMPD4/TARDBP/ACTB/DBN1/BRK1/BOP1/RAC1/PML/ZHX2/FLNB/PDLIM1/RNH1
ATP9A	0.875609	1.11783	0.0138248	3559	tags=35%, list=6%, signal=32%	HNRNPU/ACTN4/CD2AP/SMPD4/HNRNPA3/MYH10/MYH9/PML/DSTN/FLNB/PPM1F/TRIP6/RAC1/CNOT1/IPO7/DBN1/ZHX2/NDUFC1/SPART/SLC3A2/SART3/SAFB2/CYFIP1/RUFY1/CAPZB/INF2/NDUFA11/EPAS1/BOP1
CBLN4	0.923638	1.07355	0.046953	524	tags=4%, list=1%, signal=4%	NUBPL/TRIP6/FANCI
NOP58	0.942975	1.15498	0.00658101	2013	tags=30%, list=4%, signal=29%	HNRNPA3/SMPD4/LRPPRC/IPO7/HNRNPU/NCKAP1/HNRNPH1/CD2AP/DHX9/CYFIP1/SART3/GCN1/RPA1/TARDBP/ABI2/GTF2I/DBN1/NDUFA11/SLC2A1/NLN/BOP1/STRAP/PRDX1/PCBP2/ANP32E
SZRD1	0.935121	1.16235	0.00524251	1252	tags=18%, list=2%, signal=17%	CAPZB/WASF2/PCBP2/RUFY1/AAAS/SART3/TARDBP/GCN1/FLNA/RAC1/RNH1/ACTN4/HNRNPM/SLC2A1/HNRNPU
CUL1	0.913935	1.16094	0.0106863	2684	tags=26%, list=5%, signal=25%	CHCHD3/DHX9/GTF2I/ACTN4/IPO7/HNRNPM/SLC7A11/SART3/RPA1/NDUFA11/GCN1/CNOT1/FANCI/RNH1/SAMM50/HNRNPU/TNKS1BP1/ARMC6/ACTG2/STRAP/RPN1/MYH9
EIF2AK2	0.937782	1.14654	0.0123303	2090	tags=24%, list=4%, signal=23%	DHX9/GTF2I/NCKAP1/SART3/ABI2/LRPPRC/ACTB/HNRNPM/HNRNPU/SAFB2/IPO7/CNOT1/RPA1/HNRNPA3/CD2AP/HNRNPH1/PML/TARDBP/ANP32E/FLNA
MCOLN3	0.920107	1.06637	0.032967	2852	tags=11%, list=5%, signal=10%	SART3/HNRNPU/RRP1/LRPPRC/DHX9/FLNB/GYS1/RPA1/SPART
ITIH4	0.869173	1.11074	0.025974	2460	tags=18%, list=4%, signal=17%	GTF2I/STRAP/CNOT1/MYH10/CHCHD3/DHX9/ABI2/NDUFA11/CAPZB/SAFB2/NUBPL/HNRNPU/TRIP6/IPO7/RUFY1
HPF1	0.865469	1.10128	0.044955	3813	tags=24%, list=7%, signal=22%	NDUFC1/CAPZB/PRDX1/TARDBP/FANCI/MYL6/RNH1/CHD4/PRC1/CHCHD3/SLC7A11/ACTBL2/BRK1/HNRNPM/MRPS17/ATXN10/DSTN/WASF2/NLN/CYFIP1
ZFR	0.954048	1.12384	0.041958	970	tags=13%, list=2%, signal=13%	DHX9/NCKAP1/CNOT1/GTF2I/IPO7/ACTN4/CD2AP/LRPPRC/HNRNPU/SMPD4/CHCHD3
RC3H2	0.912069	1.13055	0.046953	2260	tags=20%, list=4%, signal=19%	CNOT1/GTF2I/RPA1/DHX9/TLN1/ABI2/HNRNPM/WASF2/FLNB/SART3/ZHX2/EPAS1/NCKAP1/GCN1/GYS1/TARDBP/SQSTM1
SOAT1	0.928658	1.15102	0.0117325	1202	tags=17%, list=2%, signal=16%	DHX9/HNRNPU/IQGAP1/SART3/NCKAP1/TARDBP/HNRNPA3/WASF2/CD2AP/ANP32E/PML/ACTB/HNRNPM/RUFY1
F7	0.907035	1.12818	0.00934116	2406	tags=19%, list=4%, signal=18%	DBN1/SAFB2/RAC1/BRK1/TNKS1BP1/CYFIP1/ACTN4/BOP1/UBASH3B/CHCHD3/MYH10/IQGAP1/GTF2I/ACTB/CAPZB/PPM1F
GDI2	0.922551	1.15597	0.0154703	1752	tags=24%, list=3%, signal=23%	LRPPRC/HNRNPM/GCN1/DHX9/IPO7/HNRNPU/STRAP/SMPD4/ACTB/WASF2/RPA1/ACTN4/OXSM/NCKAP1/RNH1/CD2AP/SPART/NDUFA10/PRDX1/NUBPL
PITHD1	0.871285	1.12569	0.027972	2266	tags=12%, list=4%, signal=11%	CAPZB/AAAS/TARDBP/BRK1/SART3/WASF2/PRDX1/IQGAP1/SPART/NLN
MTA3	0.917404	1.12291	0.030969	1941	tags=21%, list=4%, signal=21%	HNRNPA3/HNRNPU/SART3/RPA1/CD2AP/ACTG1/DHX9/DBN1/PCBP2/TARDBP/SMPD4/LRPPRC/GYS1/FLNB/RUFY1/ABI2/NCKAP1/PDLIM1
USP13	0.890439	1.11503	0.033966	2982	tags=26%, list=5%, signal=25%	ANP32E/DHX9/HNRNPA3/HNRNPU/HNRNPH1/IPO7/ATXN10/SMPD4/NCKAP1/CYFIP1/SART3/RPN1/NDUFS1/SQSTM1/ACTG2/PRC1/RPA1/SPART/EPAS1/GYS1/SLC7A11/ZHX2
LAMC2	0.950212	1.12158	0.00784661	690	tags=6%, list=1%, signal=6%	UBASH3B/IQGAP1/ACTBL2/FLNA/HNRNPA3
SEC61A1	0.885873	1.12049	0.038961	1697	tags=17%, list=3%, signal=16%	HNRNPM/TARDBP/RPN1/GCN1/HNRNPA3/SAFB2/ABI2/CHCHD3/CAPZB/ARMC6/PRDX1/IPO7/GYS1/RRP1
POLR3E	0.904293	1.1275	0.041958	2448	tags=24%, list=4%, signal=23%	CNOT1/IPO7/SART3/SMPD4/SQSTM1/NLN/CYFIP1/NSUN2/MYH9/OXSM/PRDX1/NCKAP1/RUFY1/PML/CAPZB/FLNB/CHCHD3/NDUFS1/NDUFA11/HNRNPU
NDC1	0.932166	1.14313	0.03996	2178	tags=21%, list=4%, signal=21%	HNRNPM/HNRNPA3/FANCI/SART3/HNRNPU/PCBP2/GCN1/CHCHD3/WASF2/CYFIP1/LRPPRC/GTF2I/RPA1/IPO7/ACTG1/TARDBP/PRC1/SLC7A11
PARP12	0.860972	1.10843	0.024975	3413	tags=20%, list=6%, signal=19%	INF2/PML/RUFY1/RAC1/GCN1/TARDBP/IPO7/ATXN10/TRIP6/BOP1/CHD4/PRDX1/ANP32E/RNH1/GYS1/SLC7A11/IQGAP1
TARBP1	0.910222	1.12649	0.031968	1416	tags=13%, list=3%, signal=13%	HNRNPU/SMPD4/CD2AP/ANP32E/SAFB2/AAAS/IPO7/LRPPRC/NDUFS1/PDLIM1/MRPS17
MXD1	0.88286	1.11642	0.037962	2853	tags=21%, list=5%, signal=20%	HNRNPH1/DHX9/TARDBP/HNRNPA3/NCKAP1/HNRNPU/SART3/INF2/PML/CD2AP/SAFB2/PPM1F/FLNA/ACTB/ACTG2/FANCI/PDLIM1/RPN1
CTDP1	0.907552	1.14583	0.0154703	2346	tags=25%, list=4%, signal=24%	SART3/HNRNPM/DHX9/RNH1/ACTN4/RUFY1/AAAS/HNRNPA3/HNRNPU/RPN1/ABI2/RPA1/NDUFA11/IPO7/CHD4/FLNB/ZHX2/PDLIM1/GCN1/SAFB2/FANCI
OGFR	0.888814	1.15599	0.00613484	1251	tags=14%, list=2%, signal=14%	RRP1/AAAS/ACTB/GCN1/ANP32E/SAFB2/FANCI/PRC1/RUFY1/SART3/SQSTM1/ACTG2
SNRNP40	0.944813	1.1642	0.00814552	1850	tags=26%, list=3%, signal=25%	DHX9/WASF2/SART3/CAPZB/TARDBP/GCN1/PCBP2/HNRNPU/HNRNPA3/FANCI/HNRNPM/PRDX1/ACTG1/RPA1/RNH1/FLNA/BRK1/IQGAP1/RUFY1/GYS1/RPN1/NDUFS2
QSER1	0.948678	1.13066	0.038961	1347	tags=19%, list=2%, signal=19%	HNRNPU/DHX9/SMPD4/IPO7/FANCI/LRPPRC/HNRNPH1/HNRNPA3/NCKAP1/SART3/HNRNPM/CD2AP/RPA1/TLN1/ABI2/FLNA
NCKAP1	0.938186	1.1262	0.048951	1439	tags=22%, list=3%, signal=21%	IPO7/CD2AP/GTF2I/CYFIP1/DHX9/HNRNPU/CNOT1/ABI2/SART3/ACTN4/MYH9/NDUFS1/STRAP/IQGAP1/TARDBP/LRPPRC/NDUFC1/CHCHD3
MRPS35	0.930567	1.18008	0.000430629	1706	tags=26%, list=3%, signal=25%	LRPPRC/STRAP/IPO7/RPA1/DHX9/GCN1/SMPD4/HNRNPU/CD2AP/SART3/ATXN10/TNKS1BP1/IQGAP1/DSTN/PCBP2/NDUFS2/BOP1/MYH10/OXSM/ACTN4/NDUFS1/RAC1
SFSWAP	0.952727	1.14959	0.0054656	1416	tags=23%, list=3%, signal=22%	SART3/HNRNPU/SMPD4/AAAS/HNRNPA3/SAFB2/HNRNPH1/PCBP2/PRC1/DHX9/HNRNPM/TARDBP/ANP32E/ACTG1/GYS1/GCN1/ABI2/ACTN4/FLNB
GPBP1	0.92963	1.14621	0.00516815	1600	tags=21%, list=3%, signal=21%	RPA1/DHX9/HNRNPH1/HNRNPU/HNRNPM/IPO7/AAAS/RUFY1/CD2AP/ACTN4/FANCI/SART3/CYFIP1/MYH9/PCBP2/ABI2/NCKAP1/TARDBP
CS	0.914743	1.13229	0.0154703	3478	tags=43%, list=6%, signal=40%	SART3/GCN1/DHX9/NCKAP1/RPA1/LRPPRC/HNRNPU/GTF2I/IPO7/GYS1/PPM1F/DBN1/MYL6/SAFB2/CHCHD3/SMPD4/ACTN4/DSTN/SAMM50/HNRNPA3/CNOT1/ZHX2/RRP1/STRAP/SLC2A3/IPO4/FLNB/PML/TARDBP/CD2AP/RAC1/SPART/OXSM/HNRNPM/NUBPL/ATXN10
MRPS24	0.870207	1.11027	0.035964	2612	tags=17%, list=5%, signal=16%	CAPZB/TARDBP/PPM1F/PML/SAFB2/ACTB/NDUFA11/SLC3A2/CD2AP/MYL6/DHX9/TNKS1BP1/AAAS/SQSTM1
ELMO2	0.940704	1.13822	0.0054656	1669	tags=25%, list=3%, signal=24%	SART3/NCKAP1/SMPD4/ABI2/CD2AP/DHX9/CNOT1/TARDBP/MYH9/GYS1/HNRNPU/HNRNPM/ACTN4/ANP32E/PCBP2/GCN1/CAPZB/PPM1F/ZHX2/WASF2/TLN1
POLD1	0.949244	1.14824	0.0371308	1257	tags=20%, list=2%, signal=20%	DHX9/HNRNPM/SART3/FANCI/AAAS/HNRNPU/HNRNPA3/SMPD4/RPA1/GCN1/WASF2/ABI2/CHCHD3/MYH9/PRC1/ACTN4/ATXN10
EIF4B	0.922429	1.14304	0.0114335	1654	tags=17%, list=3%, signal=16%	LRPPRC/IPO7/GTF2I/HNRNPU/DHX9/ABI2/SART3/HNRNPM/ATXN10/NSUN2/AAAS/PCBP2/STRAP/CNOT1
BICRA	0.920638	1.14797	0.00904225	1314	tags=14%, list=2%, signal=14%	GYS1/ACTN4/SMPD4/SAFB2/DHX9/HNRNPU/SART3/HNRNPM/ABI2/RPA1/WASF2/TNKS1BP1
U2AF2	0.943654	1.13506	0.0232804	1843	tags=21%, list=3%, signal=21%	DHX9/SMPD4/HNRNPM/HNRNPU/HNRNPH1/SART3/HNRNPA3/ACTN4/RPA1/NCKAP1/SAFB2/AAAS/GCN1/RPN1/RNH1/PPM1F/PCBP2/CNOT1
ADCK1	0.856895	1.12391	0.0127786	4683	tags=29%, list=8%, signal=26%	RNH1/ACTB/SLC3A2/INF2/CHCHD3/RAC1/CAPZB/MYL6/RUFY1/BOP1/PPM1F/SAFB2/AAAS/NDUFS2/ACTG2/ATXN10/FLNB/LRPPRC/ACTA1/SQSTM1/HNRNPM/NCKAP1/NDUFA10/ACTA2
CASP8	0.903929	1.12313	0.026973	2605	tags=24%, list=5%, signal=23%	SMPD4/NCKAP1/CYFIP1/NSUN2/TARDBP/HNRNPA3/SART3/SLC2A1/PML/SQSTM1/IPO7/UBASH3B/HNRNPM/IQGAP1/GTF2I/NLN/WASF2/DBN1/AAAS/CAPZB
LIMCH1	0.897217	1.10768	0.033966	1577	tags=11%, list=3%, signal=10%	IQGAP1/DSTN/NCKAP1/FLNA/PML/UBASH3B/SPART/CYFIP1/CD2AP
INTS13	0.913609	1.13139	0.0274858	2593	tags=26%, list=5%, signal=25%	IPO7/STRAP/LRPPRC/SMPD4/RPA1/ACTN4/DHX9/TLN1/PCBP2/CYFIP1/HNRNPA3/NDUFA11/HNRNPM/NSUN2/CD2AP/FANCI/FLNB/ACTG1/AAAS/PPM1F/GYS1/PRC1
CDON	0.917693	1.12535	0.0145721	839	tags=11%, list=2%, signal=11%	IPO7/SMPD4/NCKAP1/CNOT1/GTF2I/DHX9/HNRNPM/FLNB/HNRNPA3
TMEM161A	0.866465	1.11916	0.041357	2946	tags=20%, list=5%, signal=19%	BOP1/ATXN10/SAMM50/ARMC6/RRP1/SAFB2/RNH1/HNRNPM/SLC3A2/MYL6/PPM1F/GCN1/NDUFS2/GTF2I/ACTG1/NCKAP1/TRIP6
SUGP2	0.934627	1.14476	0.0075477	1898	tags=19%, list=3%, signal=18%	HNRNPH1/SMPD4/SART3/FANCI/DHX9/ACTN4/ABI2/AAAS/PCBP2/GCN1/ATXN10/GTF2I/NSUN2/PRC1/RRP1/HNRNPM
SLC12A2	0.867144	1.09571	0.047952	4301	tags=24%, list=8%, signal=22%	IQGAP1/FLNA/UBASH3B/INF2/SPART/MYH9/TRIP6/RPN1/ABI2/SLC3A2/ACTG1/CAPZB/RNH1/RPA1/PRC1/ANP32E/DBN1/RUFY1/SAMM50/NUBPL
[truncated: 5,262 more rows]

## Sheet: Table  S5
Consensus Clustering analysis based on FerrDb gene set
Sample	Cluster
TCGA-CC-A5UC-01A	Cluster 1
TCGA-DD-AAEI-01A	Cluster 2
TCGA-G3-A7M6-01A	Cluster 1
TCGA-DD-A1EL-01A	Cluster 1
TCGA-DD-A4NB-01A	Cluster 1
TCGA-DD-A39Y-01A	Cluster 1
[truncated: 316 more rows]

## Sheet: Table S6
limma differential expression analysis (N=1412)
[truncated: 1,413 more rows]

[truncated: 5 more sheets: Table S7, Table S8, Table S9, Table 10, Table S11]
